# Supplementary material for: A DNA barcode reference library for Swiss butterflies and forester moths as a tool for species identification, systematics and conservation
Source: PLoS One. 2018 Dec 21;13(12):e0208639. doi: 10.1371/journal.pone.0208639 (PMC6303096; doi:10.1371/journal.pone.0208639)
Supplement: S1 Table — Complete list of 868 specimens sequenced for this study, including collection information, unique specimen identifiers, associated CO1 sequences with BOLD process ID numbers and specimen deposition information. (XLSX) [file pone.0208639.s011.xlsx]

## Sheet: Lab Sheet
Project:	LEPAA			User:	Jessica R. Litman
Created:	2018-10-10
Project Code	Process ID	Sample ID	Field ID	BIN	Catalog Num	COI-5P Seq. Length	COI-5P Trace Count	COI-5P Accession	Image Count	Barcode Compliant	Contamination	Stop Codon	Flagged Record	Collection Date	Identification	Life Stage	Extra Info	Voucher Type	Institution	Notes
LEPAA	LEPAA045-16	GBIFCH-BOL_LEPAA_0045		BOLD:AAE6704	CSCF-PAP-906365	618[0n]	2			Yes				26-Jun-2013	Zygaena purpuralis				Natural History Museum of Neuchatel
LEPAA	LEPAA046-16	GBIFCH-BOL_LEPAA_0046		BOLD:ADL6446	CSCF-PAP-906376	654[0n]	2			Yes				12-Jul-2013	Zygaena transalpina				Natural History Museum of Neuchatel
LEPAA	LEPAA047-16	GBIFCH-BOL_LEPAA_0047		BOLD:AAD7506	CSCF-PAP-906363	654[0n]	2			Yes				26-Jul-2013	Zygaena loti				Natural History Museum of Neuchatel
LEPAA	LEPAA048-16	GBIFCH-BOL_LEPAA_0048		BOLD:ABX6141	CSCF-PAP-906183	654[0n]	2			Yes				26-Jul-2013	Hesperia comma				Natural History Museum of Neuchatel
LEPAA	LEPAA001-16	GBIFCH-BOL_LEPAA_0001		BOLD:AAA6940	CSCF-PAP-892997	651[0n]	2			Yes				31-Jul-2013	Melanargia galathea				Natural History Museum of Neuchatel
LEPAA	LEPAA002-16	GBIFCH-BOL_LEPAA_0002		BOLD:AAA8773	CSCF-PAP-892782	654[0n]	2			No				31-Jul-2013	Aporia crataegi				Natural History Museum of Neuchatel
LEPAA	LEPAA003-16	GBIFCH-BOL_LEPAA_0003		BOLD:AAA9312	CSCF-PAP-892815	654[0n]	2			Yes				31-Jul-2013	Brenthis ino				Natural History Museum of Neuchatel
LEPAA	LEPAA004-16	GBIFCH-BOL_LEPAA_0004		BOLD:ADF1350	CSCF-PAP-892886	654[0n]	2			Yes				31-Jul-2013	Eumedonia eumedon				Natural History Museum of Neuchatel
LEPAA	LEPAA005-16	GBIFCH-BOL_LEPAA_0005		BOLD:AAA8958	CSCF-PAP-896260	654[0n]	2			Yes				30-Jul-2013	Argynnis paphia				Natural History Museum of Neuchatel
LEPAA	LEPAA006-16	GBIFCH-BOL_LEPAA_0006		BOLD:AAB4283	CSCF-PAP-893201	654[0n]	2			Yes				31-Jul-2013	Erynnis tages				Natural History Museum of Neuchatel
LEPAA	LEPAA007-16	GBIFCH-BOL_LEPAA_0007		BOLD:AAB7458	CSCF-PAP-896479	654[0n]	2			Yes				30-Jul-2013	Apatura ilia				Natural History Museum of Neuchatel
LEPAA	LEPAA008-16	GBIFCH-BOL_LEPAA_0008		BOLD:ACE6682	CSCF-PAP-893071	654[0n]	2			No				14-Aug-2013	Parnassius apollo				Natural History Museum of Neuchatel
LEPAA	LEPAA009-16	GBIFCH-BOL_LEPAA_0009		BOLD:ABY7043	CSCF-PAP-896229	654[0n]	2			Yes				30-Jul-2013	Polygonia c-album				Natural History Museum of Neuchatel
LEPAA	LEPAA010-16	GBIFCH-BOL_LEPAA_0010		BOLD:AAB5180	CSCF-PAP-892868	653[0n]				No				31-Jul-2013	Erebia manto				Natural History Museum of Neuchatel
LEPAA	LEPAA011-16	GBIFCH-BOL_LEPAA_0011		BOLD:AAB3454	CSCF-PAP-892870	654[0n]	2			Yes				31-Jul-2013	Erebia pandrose				Natural History Museum of Neuchatel
LEPAA	LEPAA012-16	GBIFCH-BOL_LEPAA_0012		BOLD:AAA8264	CSCF-PAP-892864	618[0n]	2			Yes				31-Jul-2013	Erebia euryale				Natural History Museum of Neuchatel
LEPAA	LEPAA013-16	GBIFCH-BOL_LEPAA_0013		BOLD:AAB1698	CSCF-PAP-896181	654[0n]	2			Yes				30-Jul-2013	Araschnia levana				Natural History Museum of Neuchatel
LEPAA	LEPAA014-16	GBIFCH-BOL_LEPAA_0014		BOLD:AAJ1029	CSCF-PAP-893217	654[0n]	2			Yes				31-Jul-2013	Erebia pharte				Natural History Museum of Neuchatel
LEPAA	LEPAA015-16	GBIFCH-BOL_LEPAA_0015		BOLD:AAB1341	CSCF-PAP-893199	654[0n]	2			Yes				31-Jul-2013	Erebia oeme				Natural History Museum of Neuchatel
LEPAA	LEPAA016-16	GBIFCH-BOL_LEPAA_0016			CSCF-PAP-896298	0[n]				No				30-Jul-2013	Brenthis daphne				Natural History Museum of Neuchatel
LEPAA	LEPAA017-16	GBIFCH-BOL_LEPAA_0017		BOLD:AAJ9881	CSCF-PAP-893131	654[0n]	2			Yes				02-Aug-2013	Zygaena fausta				Natural History Museum of Neuchatel
LEPAA	LEPAA018-16	GBIFCH-BOL_LEPAA_0018		BOLD:AAA5337	CSCF-PAP-893129	630[0n]	2			Yes				14-Aug-2013	Vanessa cardui				Natural History Museum of Neuchatel
LEPAA	LEPAA019-16	GBIFCH-BOL_LEPAA_0019		BOLD:AAB3027	CSCF-PAP-893163	654[0n]	2			Yes				15-Aug-2013	Cyaniris semiargus				Natural History Museum of Neuchatel
LEPAA	LEPAA020-16	GBIFCH-BOL_LEPAA_0020		BOLD:AAA6764	CSCF-PAP-895982	654[0n]	2			Yes				30-Jul-2013	Thymelicus sylvestris				Natural History Museum of Neuchatel
LEPAA	LEPAA021-16	GBIFCH-BOL_LEPAA_0021		BOLD:AAB2322	CSCF-PAP-892792	639[0n]	2			Yes				15-Aug-2013	Speyeria agalaja				Natural History Museum of Neuchatel
LEPAA	LEPAA022-16	GBIFCH-BOL_LEPAA_0022		BOLD:AAA5810	CSCF-PAP-896480	654[0n]	2			Yes				30-Jul-2013	Papilio machaon				Natural History Museum of Neuchatel
LEPAA	LEPAA023-16	GBIFCH-BOL_LEPAA_0023		BOLD:AAA9909	CSCF-PAP-892900	654[0n]	2			Yes				14-Aug-2013	Hyponephele lycaon				Natural History Museum of Neuchatel
LEPAA	LEPAA024-16	GBIFCH-BOL_LEPAA_0024		BOLD:AAB0589	CSCF-PAP-892895	654[0n]	2			Yes				14-Aug-2013	Hipparchia semele				Natural History Museum of Neuchatel
LEPAA	LEPAA025-16	GBIFCH-BOL_LEPAA_0025		BOLD:AAA8713	CSCF-PAP-896243	654[0n]	2			Yes				13-Aug-2013	Issoria lathonia				Natural History Museum of Neuchatel
LEPAA	LEPAA026-16	GBIFCH-BOL_LEPAA_0026		BOLD:AAB0123	CSCF-PAP-896244	654[0n]	2			Yes				13-Aug-2013	Lasiommata megera				Natural History Museum of Neuchatel
LEPAA	LEPAA027-16	GBIFCH-BOL_LEPAA_0027		BOLD:AAB3187	CSCF-PAP-893111	654[0n]	2			Yes				14-Aug-2013	Satyrium spini				Natural History Museum of Neuchatel
LEPAA	LEPAA028-16	GBIFCH-BOL_LEPAA_0028		BOLD:AAB3783	CSCF-PAP-896091	654[0n]	2			Yes				13-Aug-2013	Pieris mannii				Natural History Museum of Neuchatel
LEPAA	LEPAA029-16	GBIFCH-BOL_LEPAA_0029		BOLD:ABX5016	CSCF-PAP-893089	654[0n]	2			Yes				14-Aug-2013	Polyommatus dorylas				Natural History Museum of Neuchatel
LEPAA	LEPAA030-16	GBIFCH-BOL_LEPAA_0030		BOLD:AAA3628	CSCF-PAP-896491	654[0n]	2			Yes				13-Aug-2013	Plebejus idas				Natural History Museum of Neuchatel
LEPAA	LEPAA031-16	GBIFCH-BOL_LEPAA_0031		BOLD:AAB0552	CSCF-PAP-906258	654[0n]	2			Yes				26-Jun-2013	Pieris brassicae				Natural History Museum of Neuchatel
LEPAA	LEPAA032-16	GBIFCH-BOL_LEPAA_0032		BOLD:AAA2226	CSCF-PAP-906259	654[0n]	2			Yes				26-Jul-2013	Pieris bryoniae				Natural History Museum of Neuchatel
LEPAA	LEPAA033-16	GBIFCH-BOL_LEPAA_0033		BOLD:AAA2226	CSCF-PAP-906271	654[0n]	2			Yes				26-Jun-2013	Pieris napi				Natural History Museum of Neuchatel
LEPAA	LEPAA034-16	GBIFCH-BOL_LEPAA_0034		BOLD:AAA3447	CSCF-PAP-906027	654[0n]	2			Yes				26-Jul-2013	Colias palaeno				Natural History Museum of Neuchatel
LEPAA	LEPAA035-16	GBIFCH-BOL_LEPAA_0035		BOLD:ACF0844	CSCF-PAP-906031	654[0n]	2			Yes				26-Jul-2013	Colias phicomone				Natural History Museum of Neuchatel
LEPAA	LEPAA036-16	GBIFCH-BOL_LEPAA_0036		BOLD:AAB1133	CSCF-PAP-905926	654[0n]	2			Yes				26-Jul-2013	Anthocharis cardamines				Natural History Museum of Neuchatel
LEPAA	LEPAA037-16	GBIFCH-BOL_LEPAA_0037		BOLD:ABZ3039	CSCF-PAP-893894	600[0n]	2			Yes				13-Aug-2013	Colias croceus				Natural History Museum of Neuchatel
LEPAA	LEPAA038-16	GBIFCH-BOL_LEPAA_0038		BOLD:AAD5447	CSCF-PAP-906353	654[0n]	2			Yes				12-Jul-2013	Zygaena ephialtes				Natural History Museum of Neuchatel
LEPAA	LEPAA039-16	GBIFCH-BOL_LEPAA_0039		BOLD:AAA5810	CSCF-PAP-893700	639[0n]	2			Yes				15-Jul-2013	Papilio machaon				Natural History Museum of Neuchatel
LEPAA	LEPAA040-16	GBIFCH-BOL_LEPAA_0040		BOLD:AAA9222	CSCF-PAP-893999	597[0n]	2			Yes				11-May-2013	Gonepteryx rhamni				Natural History Museum of Neuchatel
LEPAA	LEPAA041-16	GBIFCH-BOL_LEPAA_0041		BOLD:AAA8773	CSCF-PAP-894150	654[0n]	2			Yes				07-Jun-2013	Aporia crataegi				Natural History Museum of Neuchatel
LEPAA	LEPAA042-16	GBIFCH-BOL_LEPAA_0042		BOLD:AAA2224	CSCF-PAP-893625	654[0n]	2			Yes				07-Jun-2013	Pieris rapae				Natural History Museum of Neuchatel
LEPAA	LEPAA043-16	GBIFCH-BOL_LEPAA_0043		BOLD:AAD7474	CSCF-PAP-906354	624[0n]	2			Yes				26-Jul-2013	Zygaena exulans				Natural History Museum of Neuchatel
LEPAA	LEPAA044-16	GBIFCH-BOL_LEPAA_0044		BOLD:AAL5818	CSCF-PAP-906356	654[0n]	2			Yes				26-Jun-2013	Zygaena filipendulae				Natural History Museum of Neuchatel
LEPAA	LEPAA049-16	GBIFCH-BOL_LEPAA_0049		BOLD:AAA6267	CSCF-PAP-905981	633[0n]	2			Yes				05-Jul-2013	Carterocephalus palaemon				Natural History Museum of Neuchatel
LEPAA	LEPAA050-16	GBIFCH-BOL_LEPAA_0050		BOLD:AAC3322	CSCF-PAP-905980	639[0n]	2			No				26-Jun-2013	Carcharodus floccifera				Natural History Museum of Neuchatel
LEPAA	LEPAA051-16	GBIFCH-BOL_LEPAA_0051		BOLD:AAA6760	CSCF-PAP-906349	648[0n]	2			Yes				05-Jul-2013	Thymelicus lineola				Natural History Museum of Neuchatel
LEPAA	LEPAA052-16	GBIFCH-BOL_LEPAA_0052		BOLD:AAB4864	CSCF-PAP-906252	654[0n]	2			Yes				03-Jun-2013	Ochlodes sylvanus				Natural History Museum of Neuchatel
LEPAA	LEPAA053-16	GBIFCH-BOL_LEPAA_0053		BOLD:AAA6761	CSCF-PAP-894039	654[0n]	2			Yes				15-Jul-2013	Thymelicus sylvestris				Natural History Museum of Neuchatel
LEPAA	LEPAA054-16	GBIFCH-BOL_LEPAA_0054		BOLD:AAB4283	CSCF-PAP-893916	618[0n]	1			No				11-May-2013	Erynnis tages				Natural History Museum of Neuchatel
LEPAA	LEPAA055-16	GBIFCH-BOL_LEPAA_0055		BOLD:AAA5531	CSCF-PAP-894766	651[0n]	2			Yes				27-May-2013	Colias hyale				Natural History Museum of Neuchatel
LEPAA	LEPAA056-16	GBIFCH-BOL_LEPAA_0056		BOLD:AAA2226	CSCF-PAP-894884	651[0n]	2			Yes				07-May-2013	Pieris napi				Natural History Museum of Neuchatel
LEPAA	LEPAA057-16	GBIFCH-BOL_LEPAA_0057		BOLD:AAB3783	CSCF-PAP-894441	654[0n]	2			Yes				08-Jul-2013	Pieris mannii				Natural History Museum of Neuchatel
LEPAA	LEPAA058-16	GBIFCH-BOL_LEPAA_0058		BOLD:AAA7663	CSCF-PAP-894912	654[0n]	2			Yes				27-May-2013	Celastrina argiolus				Natural History Museum of Neuchatel
LEPAA	LEPAA059-16	GBIFCH-BOL_LEPAA_0059		BOLD:ABX6048	CSCF-PAP-894480	654[0n]	2			Yes				27-May-2013	Cupido argiades				Natural History Museum of Neuchatel
LEPAA	LEPAA060-16	GBIFCH-BOL_LEPAA_0060		BOLD:AAA9082	CSCF-PAP-894767	654[0n]	2			No				27-May-2013	Cupido minimus				Natural History Museum of Neuchatel
LEPAA	LEPAA061-16	GBIFCH-BOL_LEPAA_0061		BOLD:AAA3303	CSCF-PAP-894432	654[0n]	2			Yes				24-Jul-2013	Polyommatus icarus				Natural History Museum of Neuchatel
LEPAA	LEPAA062-16	GBIFCH-BOL_LEPAA_0062		BOLD:AAB3703	CSCF-PAP-894481	651[0n]	2			Yes				27-May-2013	Polyommatus thersites				Natural History Museum of Neuchatel
LEPAA	LEPAA063-16	GBIFCH-BOL_LEPAA_0063		BOLD:AAA3305	CSCF-PAP-894431	651[0n]	2			Yes				24-Jul-2013	Lysandra coridon				Natural History Museum of Neuchatel
LEPAA	LEPAA064-16	GBIFCH-BOL_LEPAA_0064		BOLD:AAC6392	CSCF-PAP-894638	630[0n]	2			Yes				08-Jul-2013	Satyrium pruni				Natural History Museum of Neuchatel
LEPAA	LEPAA065-16	GBIFCH-BOL_LEPAA_0065			CSCF-PAP-895451	0[n]				No				23-Jul-2013	Carcharodus alceae				Natural History Museum of Neuchatel
LEPAA	LEPAA066-16	GBIFCH-BOL_LEPAA_0066		BOLD:AAB4283	CSCF-PAP-894926	621[0n]	2			Yes				27-May-2013	Erynnis tages				Natural History Museum of Neuchatel
LEPAA	LEPAA067-16	GBIFCH-BOL_LEPAA_0067		BOLD:AAA9312	CSCF-PAP-894542	621[0n]	2			Yes				08-Jul-2013	Brenthis daphne				Natural History Museum of Neuchatel
LEPAA	LEPAA068-16	GBIFCH-BOL_LEPAA_0068		BOLD:AAB3455	CSCF-PAP-894564	654[0n]	2			Yes				23-Jul-2013	Erebia aethiops				Natural History Museum of Neuchatel
LEPAA	LEPAA069-16	GBIFCH-BOL_LEPAA_0069		BOLD:AAB5999	CSCF-PAP-894685	651[0n]	2			No				06-Aug-2013	Thecla betulae				Natural History Museum of Neuchatel
LEPAA	LEPAA070-16	GBIFCH-BOL_LEPAA_0070		BOLD:AAD7506	CSCF-PAP-894563	654[0n]	2			Yes				23-Jul-2013	Zygaena loti				Natural History Museum of Neuchatel
LEPAA	LEPAA071-16	GBIFCH-BOL_LEPAA_0071		BOLD:AAD5447	CSCF-PAP-894879	651[0n]	2			Yes				23-Jul-2013	Zygaena ephialtes				Natural History Museum of Neuchatel
LEPAA	LEPAA072-16	GBIFCH-BOL_LEPAA_0072		BOLD:ADL6544	CSCF-PAP-895023	654[0n]	2			Yes				08-Jul-2013	Zygaena transalpina				Natural History Museum of Neuchatel
LEPAA	LEPAA073-16	GBIFCH-BOL_LEPAA_0073		BOLD:AAB9884	CSCF-PAP-905807	630[0n]	2			Yes				04-Jun-2013	Minois dryas				Natural History Museum of Neuchatel
LEPAA	LEPAA074-16	GBIFCH-BOL_LEPAA_0074		BOLD:AAA4515	CSCF-PAP-905808	621[0n]	2			Yes				14-May-2013	Pararge aegeria				Natural History Museum of Neuchatel
LEPAA	LEPAA075-16	GBIFCH-BOL_LEPAA_0075		BOLD:AAA4515	CSCF-PAP-905809	630[0n]	2			Yes				03-Jun-2013	Pararge aegeria				Natural History Museum of Neuchatel
LEPAA	LEPAA076-16	GBIFCH-BOL_LEPAA_0076		BOLD:ACE4157	CSCF-PAP-905803	636[0n]	2			Yes				14-May-2013	Melitaea cinxia				Natural History Museum of Neuchatel
LEPAA	LEPAA077-16	GBIFCH-BOL_LEPAA_0077		BOLD:AAB3703	CSCF-PAP-905823	627[0n]	2			Yes				05-Jun-2013	Polyommatus thersites				Natural History Museum of Neuchatel
LEPAA	LEPAA078-16	GBIFCH-BOL_LEPAA_0078		BOLD:AAA3628	CSCF-PAP-905819	629[0n]	2			Yes				04-Jun-2013	Plebejus argyrognomon				Natural History Museum of Neuchatel
LEPAA	LEPAA079-16	GBIFCH-BOL_LEPAA_0079		BOLD:AAA4731	CSCF-PAP-905779	654[0n]	2			Yes				03-Jun-2013	Aricia agestis				Natural History Museum of Neuchatel
LEPAA	LEPAA080-16	GBIFCH-BOL_LEPAA_0080		BOLD:ABY8343	CSCF-PAP-905799	630[0n]	2			Yes				17-Apr-2013	Leptidea juvernica				Natural History Museum of Neuchatel
LEPAA	LEPAA081-16	GBIFCH-BOL_LEPAA_0081		BOLD:AAA6298	CSCF-PAP-905800	630[0n]	2			Yes				07-Jun-2013	Leptidea sinapis				Natural History Museum of Neuchatel
LEPAA	LEPAA082-16	GBIFCH-BOL_LEPAA_0082			CSCF-PAP-905964	0[n]				No				26-Jul-2013	Boloria pales				Natural History Museum of Neuchatel
LEPAA	LEPAA083-16	GBIFCH-BOL_LEPAA_0083		BOLD:AAA7584	CSCF-PAP-906233	627[0n]	2			Yes				03-Jun-2013	Melitaea nevadensis				Natural History Museum of Neuchatel
LEPAA	LEPAA084-16	GBIFCH-BOL_LEPAA_0084		BOLD:AAB5849	CSCF-PAP-905954	627[0n]	2			No				26-Jun-2013	Boloria dia				Natural History Museum of Neuchatel
LEPAA	LEPAA085-16	GBIFCH-BOL_LEPAA_0085		BOLD:AAB1747	CSCF-PAP-893650	627[0n]	2			Yes				11-May-2013	Boloria euphrosyne				Natural History Museum of Neuchatel
LEPAA	LEPAA086-16	GBIFCH-BOL_LEPAA_0086		BOLD:AAA6940	CSCF-PAP-906217	615[0n]	2			Yes				26-Jun-2013	Melanargia galathea				Natural History Museum of Neuchatel
LEPAA	LEPAA087-16	GBIFCH-BOL_LEPAA_0087		BOLD:AAC3112	CSCF-PAP-906193	606[0n]	2			Yes				05-Jul-2013	Lasiommata petropolitana				Natural History Museum of Neuchatel
LEPAA	LEPAA088-16	GBIFCH-BOL_LEPAA_0088		BOLD:AAA8853	CSCF-PAP-906187	648[0n]	2			Yes				26-Jun-2013	Lasiommata maera				Natural History Museum of Neuchatel
LEPAA	LEPAA089-16	GBIFCH-BOL_LEPAA_0089		BOLD:AAB0123	CSCF-PAP-894091	618[0n]	2			Yes				22-May-2013	Lasiommata megera				Natural History Museum of Neuchatel
LEPAA	LEPAA090-16	GBIFCH-BOL_LEPAA_0090		BOLD:AAB9884	CSCF-PAP-893849	654[0n]	2			Yes				13-Aug-2013	Minois dryas				Natural History Museum of Neuchatel
LEPAA	LEPAA091-16	GBIFCH-BOL_LEPAA_0091		BOLD:AAA7351	CSCF-PAP-894304	630[0n]	2			Yes				22-May-2013	Coenonympha pamphilus				Natural History Museum of Neuchatel
LEPAA	LEPAA092-16	GBIFCH-BOL_LEPAA_0092		BOLD:AAA9312	CSCF-PAP-905973	627[0n]	2			Yes				26-Jun-2013	Brenthis daphne				Natural History Museum of Neuchatel
LEPAA	LEPAA093-16	GBIFCH-BOL_LEPAA_0093		BOLD:ACS2433	CSCF-PAP-905967	633[0n]	2			Yes				26-Jul-2013	Boloria titania				Natural History Museum of Neuchatel
LEPAA	LEPAA094-16	GBIFCH-BOL_LEPAA_0094		BOLD:AAA3082	CSCF-PAP-906242	630[0n]	2			Yes				05-Jul-2013	Melitaea diamina				Natural History Museum of Neuchatel
LEPAA	LEPAA095-16	GBIFCH-BOL_LEPAA_0095		BOLD:AAA7508	CSCF-PAP-906178	630[0n]	2			Yes				26-Jul-2013	Euphydryas aurinia glaciegenita				Natural History Museum of Neuchatel
LEPAA	LEPAA096-16	GBIFCH-BOL_LEPAA_0096		BOLD:ABY9182	CSCF-PAP-905944	648[0n]	2			Yes				02-Aug-2013	Fabriciana niobe				Natural History Museum of Neuchatel
LEPAA	LEPAA097-16	GBIFCH-BOL_LEPAA_0097		BOLD:AAB8291	CSCF-PAP-906196	651[0n]	2			Yes				26-Jun-2013	Limenitis camilla				Natural History Museum of Neuchatel
LEPAA	LEPAA098-16	GBIFCH-BOL_LEPAA_0098		BOLD:ACE5691	CSCF-PAP-906256	615[0n]	2			Yes				05-Jul-2013	Oeneis glacialis				Natural History Museum of Neuchatel
LEPAA	LEPAA099-16	GBIFCH-BOL_LEPAA_0099		BOLD:AAB0589	CSCF-PAP-894218	573[0n]	2			No				05-Jul-2013	Hipparchia semele				Natural History Museum of Neuchatel
LEPAA	LEPAA100-16	GBIFCH-BOL_LEPAA_0100		BOLD:AAC0485	CSCF-PAP-893713	654[0n]	2			Yes				15-Jul-2013	Hipparchia fagi				Natural History Museum of Neuchatel
LEPAA	LEPAA101-16	GBIFCH-BOL_LEPAA_0101		BOLD:ABA8687	CSCF-PAP-906041	621[0n]	2			Yes				05-Jul-2013	Erebia alberganus				Natural History Museum of Neuchatel
LEPAA	LEPAA102-16	GBIFCH-BOL_LEPAA_0102			CSCF-PAP-906093	0[n]				No				02-Aug-2013	Erebia ligea				Natural History Museum of Neuchatel
LEPAA	LEPAA103-16	GBIFCH-BOL_LEPAA_0103		BOLD:AAC5377	CSCF-PAP-906099	633[0n]	2			Yes				26-Jul-2013	Erebia melampus				Natural History Museum of Neuchatel
LEPAA	LEPAA104-16	GBIFCH-BOL_LEPAA_0104		BOLD:AAJ1029	CSCF-PAP-906144	612[0n]	2			Yes				26-Jul-2013	Erebia pharte				Natural History Museum of Neuchatel
LEPAA	LEPAA105-16	GBIFCH-BOL_LEPAA_0105		BOLD:AAB0969	CSCF-PAP-906064	654[0n]	2			Yes				26-Jul-2013	Erebia epiphron				Natural History Museum of Neuchatel
LEPAA	LEPAA106-16	GBIFCH-BOL_LEPAA_0106		BOLD:AAB1120	CSCF-PAP-905998	654[0n]	2			Yes				26-Jul-2013	Coenonympha darwiniana				Natural History Museum of Neuchatel
LEPAA	LEPAA107-16	GBIFCH-BOL_LEPAA_0107		BOLD:ACF1425	CSCF-PAP-905987	591[0n]	2			No				26-Jun-2013	Coenonympha arcania				Natural History Museum of Neuchatel
LEPAA	LEPAA108-16	GBIFCH-BOL_LEPAA_0108			CSCF-PAP-894151	0[n]				No				07-Jun-2013	Melitaea didyma				Natural History Museum of Neuchatel
LEPAA	LEPAA109-16	GBIFCH-BOL_LEPAA_0109		BOLD:AAB2322	CSCF-PAP-893720	597[0n]	2			Yes				05-Jul-2013	Speyeria agalaja				Natural History Museum of Neuchatel
LEPAA	LEPAA110-16	GBIFCH-BOL_LEPAA_0110			CSCF-PAP-894296	0[n]				No				13-Aug-2013	Boloria selene				Natural History Museum of Neuchatel
LEPAA	LEPAA111-16	GBIFCH-BOL_LEPAA_0111		BOLD:AAA7785	CSCF-PAP-893819	654[0n]	2			Yes				07-Jun-2013	Maniola jurtina				Natural History Museum of Neuchatel
LEPAA	LEPAA112-16	GBIFCH-BOL_LEPAA_0112			CSCF-PAP-906072	0[n]				No				26-Jul-2013	Erebia euryale				Natural History Museum of Neuchatel
LEPAA	LEPAA113-16	GBIFCH-BOL_LEPAA_0113			CSCF-PAP-906151	0[n]				No				26-Jul-2013	Erebia tyndarus				Natural History Museum of Neuchatel
LEPAA	LEPAA114-16	GBIFCH-BOL_LEPAA_0114		BOLD:ACE7893	CSCF-PAP-905950	654[0n]	2			Yes				26-Jul-2013	Aricia artaxerxes				Natural History Museum of Neuchatel
LEPAA	LEPAA115-16	GBIFCH-BOL_LEPAA_0115			CSCF-PAP-906037	0[n]				No				26-Jul-2013	Cupido minimus				Natural History Museum of Neuchatel
LEPAA	LEPAA116-16	GBIFCH-BOL_LEPAA_0116		BOLD:AAB8947	CSCF-PAP-906198	654[0n]	2			Yes				26-Jul-2013	Lycaena hippothoe eurydame				Natural History Museum of Neuchatel
LEPAA	LEPAA117-16	GBIFCH-BOL_LEPAA_0117			CSCF-PAP-905951	0[n]				No				26-Jul-2013	Eumedonia eumedon				Natural History Museum of Neuchatel
LEPAA	LEPAA118-16	GBIFCH-BOL_LEPAA_0118		BOLD:AAA3628	CSCF-PAP-906285	654[0n]	2			Yes				26-Jun-2013	Plebejus argyrognomon				Natural History Museum of Neuchatel
LEPAA	LEPAA119-16	GBIFCH-BOL_LEPAA_0119			CSCF-PAP-893654	0[n]				No				11-May-2013	Celastrina argiolus				Natural History Museum of Neuchatel
LEPAA	LEPAA120-16	GBIFCH-BOL_LEPAA_0120		BOLD:AAA3303	CSCF-PAP-894026	618[0n]	1			No				15-Jul-2013	Polyommatus icarus				Natural History Museum of Neuchatel
LEPAA	LEPAA121-16	GBIFCH-BOL_LEPAA_0121		BOLD:AAA4731	CSCF-PAP-894038	648[0n]	2			Yes				15-Jul-2013	Aricia agestis				Natural History Museum of Neuchatel
LEPAA	LEPAA122-16	GBIFCH-BOL_LEPAA_0122		BOLD:AAA3628	CSCF-PAP-906284	654[0n]	2			Yes				03-Jun-2013	Plebejus argyrognomon				Natural History Museum of Neuchatel
LEPAA	LEPAA123-16	GBIFCH-BOL_LEPAA_0123		BOLD:ADF1340	CSCF-PAP-906370	654[0n]	2			Yes				26-Jun-2013	Zygaena romeo				Natural History Museum of Neuchatel
LEPAA	LEPAA124-16	GBIFCH-BOL_LEPAA_0124		BOLD:AAA7370	CSCF-PAP-906251	654[0n]	2			Yes				26-Jun-2013	Melitaea phoebe				Natural History Museum of Neuchatel
LEPAA	LEPAA125-16	GBIFCH-BOL_LEPAA_0125		BOLD:ACF5881	CSCF-PAP-906145	606[0n]	2			Yes				03-Sep-2013	Erebia pronoe psathura				Natural History Museum of Neuchatel
LEPAA	LEPAA126-16	GBIFCH-BOL_LEPAA_0126		BOLD:AAB5180	CSCF-PAP-906095	588[0n]	2			Yes				02-Aug-2013	Erebia bubastis				Natural History Museum of Neuchatel
LEPAA	LEPAA127-16	GBIFCH-BOL_LEPAA_0127		BOLD:ACF7581	CSCF-PAP-906136	654[0n]	2			Yes				03-Sep-2013	Erebia montana				Natural History Museum of Neuchatel
LEPAA	LEPAA128-16	GBIFCH-BOL_LEPAA_0128		BOLD:AAB7639	CSCF-PAP-906342	651[0n]	2			Yes				26-Jul-2013	Pyrgus serratulae				Natural History Museum of Neuchatel
LEPAA	LEPAA129-16	GBIFCH-BOL_LEPAA_0129		BOLD:ABY4448	CSCF-PAP-894421	648[0n]	2			Yes				31-Jul-2013	Cupido alcetas				Natural History Museum of Neuchatel
LEPAA	LEPAA130-16	GBIFCH-BOL_LEPAA_0130		BOLD:AAA3303	CSCF-PAP-894339	654[0n]	2			Yes				12-Jun-2013	Polyommatus icarus				Natural History Museum of Neuchatel
LEPAA	LEPAA131-16	GBIFCH-BOL_LEPAA_0131		BOLD:ACE9753	CSCF-PAP-894995	654[0n]	2			Yes				12-Jun-2013	Lysandra bellargus				Natural History Museum of Neuchatel
LEPAA	LEPAA132-16	GBIFCH-BOL_LEPAA_0132			CSCF-PAP-894402	0[n]				No				31-Jul-2013	Lycaena phlaeas				Natural History Museum of Neuchatel
LEPAA	LEPAA133-16	GBIFCH-BOL_LEPAA_0133		BOLD:AAB3187	CSCF-PAP-894703	654[0n]	2			Yes				31-Jul-2013	Satyrium spini				Natural History Museum of Neuchatel
LEPAA	LEPAA134-16	GBIFCH-BOL_LEPAA_0134		BOLD:AAC8100	CSCF-PAP-894812	630[0n]	2			Yes				31-Jul-2013	Zygaena filipendulae				Natural History Museum of Neuchatel
LEPAA	LEPAA135-16	GBIFCH-BOL_LEPAA_0135			CSCF-PAP-894382	0[n]				No				04-Jun-2013	Leptidea sinapis				Natural History Museum of Neuchatel
LEPAA	LEPAA136-16	GBIFCH-BOL_LEPAA_0136		BOLD:AAA9222	CSCF-PAP-895010	654[0n]	2			Yes				31-Jul-2013	Gonepteryx rhamni				Natural History Museum of Neuchatel
LEPAA	LEPAA137-16	GBIFCH-BOL_LEPAA_0137		BOLD:AAA2224	CSCF-PAP-894394	654[0n]	2			Yes				31-Jul-2013	Pieris rapae				Natural History Museum of Neuchatel
LEPAA	LEPAA138-16	GBIFCH-BOL_LEPAA_0138		BOLD:AAA8713	CSCF-PAP-894418	654[0n]	2			Yes				31-Jul-2013	Issoria lathonia				Natural History Museum of Neuchatel
LEPAA	LEPAA139-16	GBIFCH-BOL_LEPAA_0139			CSCF-PAP-895421	0[n]				No				12-Jun-2013	Melitaea athalia				Natural History Museum of Neuchatel
LEPAA	LEPAA140-16	GBIFCH-BOL_LEPAA_0140		BOLD:AAB1747	CSCF-PAP-894380	642[0n]	2			Yes				12-Jun-2013	Boloria euphrosyne				Natural History Museum of Neuchatel
LEPAA	LEPAA141-16	GBIFCH-BOL_LEPAA_0141		BOLD:ACF2774	CSCF-PAP-894937	654[0n]	2			Yes				31-Jul-2013	Aphantopus hyperantus				Natural History Museum of Neuchatel
LEPAA	LEPAA142-16	GBIFCH-BOL_LEPAA_0142			CSCF-PAP-895217	0[n]				No				05-Jul-2013	Maniola jurtina				Natural History Museum of Neuchatel
LEPAA	LEPAA143-16	GBIFCH-BOL_LEPAA_0143		BOLD:ACF1425	CSCF-PAP-894364	654[0n]	2			Yes				05-Jul-2013	Coenonympha arcania				Natural History Museum of Neuchatel
LEPAA	LEPAA144-16	GBIFCH-BOL_LEPAA_0144		BOLD:AAA6940	CSCF-PAP-895408	645[0n]	2			Yes				05-Jul-2013	Melanargia galathea				Natural History Museum of Neuchatel
LEPAA	LEPAA145-16	GBIFCH-BOL_LEPAA_0145		BOLD:AAA7351	CSCF-PAP-894345	621[0n]	2			Yes				31-Jul-2013	Coenonympha pamphilus				Natural History Museum of Neuchatel
LEPAA	LEPAA146-16	GBIFCH-BOL_LEPAA_0146		BOLD:AAB6141	CSCF-PAP-894415	654[0n]	2			Yes				04-Jun-2013	Pyrgus malvae				Natural History Museum of Neuchatel
LEPAA	LEPAA147-16	GBIFCH-BOL_LEPAA_0147			CSCF-PAP-906330	0[n]				No				26-Jul-2013	Cyaniris semiargus				Natural History Museum of Neuchatel
LEPAA	LEPAA148-16	GBIFCH-BOL_LEPAA_0148			CSCF-PAP-894385	0[n]				No				04-Jun-2013	Carterocephalus palaemon				Natural History Museum of Neuchatel
LEPAA	LEPAA149-16	GBIFCH-BOL_LEPAA_0149		BOLD:AAB4864	CSCF-PAP-894831	654[0n]	2			Yes				31-Jul-2013	Ochlodes sylvanus				Natural History Museum of Neuchatel
LEPAA	LEPAA150-16	GBIFCH-BOL_LEPAA_0150		BOLD:AAA6761	CSCF-PAP-894383	612[0n]	2			No				31-Jul-2013	Thymelicus sylvestris				Natural History Museum of Neuchatel
LEPAA	LEPAA151-16	GBIFCH-BOL_LEPAA_0151			CSCF-PAP-890919	0[n]				No				12-Apr-2013	Pieris napi				Natural History Museum of Neuchatel
LEPAA	LEPAA152-16	GBIFCH-BOL_LEPAA_0152		BOLD:AAB5849	CSCF-PAP-890509	654[0n]	2			Yes				16-Apr-2013	Boloria dia				Natural History Museum of Neuchatel
LEPAA	LEPAA153-16	GBIFCH-BOL_LEPAA_0153		BOLD:ACE4157	CSCF-PAP-890825	654[0n]	2			Yes				08-May-2013	Melitaea cinxia				Natural History Museum of Neuchatel
LEPAA	LEPAA154-16	GBIFCH-BOL_LEPAA_0154		BOLD:AAB8731	CSCF-PAP-890707	654[0n]	2			Yes				04-Jun-2013	Hamearis lucina				Natural History Museum of Neuchatel
LEPAA	LEPAA155-16	GBIFCH-BOL_LEPAA_0155		BOLD:ABZ0347	CSCF-PAP-890842	633[0n]	2			Yes				06-Jun-2013	Melitaea didyma				Natural History Museum of Neuchatel
LEPAA	LEPAA156-16	GBIFCH-BOL_LEPAA_0156		BOLD:AAC1025	CSCF-PAP-890846	654[0n]	2			No				06-Jun-2013	Melitaea parthenoides				Natural History Museum of Neuchatel
LEPAA	LEPAA157-16	GBIFCH-BOL_LEPAA_0157		BOLD:AAB8291	CSCF-PAP-890750	519[0n]	2			No				02-Jul-2013	Limenitis camilla				Natural History Museum of Neuchatel
LEPAA	LEPAA158-16	GBIFCH-BOL_LEPAA_0158		BOLD:AAB9154	CSCF-PAP-890670	654[0n]	2			Yes				08-May-2013	Erebia triaria				Natural History Museum of Neuchatel
LEPAA	LEPAA159-16	GBIFCH-BOL_LEPAA_0159		BOLD:AAC3364	CSCF-PAP-890502	654[0n]	2			Yes				05-Jul-2013	Eumedonia eumedon				Natural History Museum of Neuchatel
LEPAA	LEPAA160-16	GBIFCH-BOL_LEPAA_0160			CSCF-PAP-890892	0[n]				No				16-Apr-2013	Pararge aegeria				Natural History Museum of Neuchatel
LEPAA	LEPAA161-16	GBIFCH-BOL_LEPAA_0161			CSCF-PAP-890861	0[n]				No				14-Apr-2013	Nymphalis antiopa				Natural History Museum of Neuchatel
LEPAA	LEPAA162-16	GBIFCH-BOL_LEPAA_0162		BOLD:AAB4921	CSCF-PAP-890723	624[0n]	2			Yes				07-Apr-2013	Aglais io				Natural History Museum of Neuchatel
LEPAA	LEPAA163-16	GBIFCH-BOL_LEPAA_0163		BOLD:AAB3454	CSCF-PAP-890662	654[0n]	2			Yes				30-Jul-2013	Erebia pandrose				Natural History Museum of Neuchatel
LEPAA	LEPAA164-16	GBIFCH-BOL_LEPAA_0164			CSCF-PAP-890655	0[n]				No				31-Jul-2013	Erebia melampus				Natural History Museum of Neuchatel
LEPAA	LEPAA165-16	GBIFCH-BOL_LEPAA_0165		BOLD:AAD7506	CSCF-PAP-891063	594[0n]	2			No				06-Jun-2013	Zygaena loti				Natural History Museum of Neuchatel
LEPAA	LEPAA166-16	GBIFCH-BOL_LEPAA_0166			CSCF-PAP-891033	0[n]				No				08-May-2013	Scolitantides orion				Natural History Museum of Neuchatel
LEPAA	LEPAA167-16	GBIFCH-BOL_LEPAA_0167		BOLD:AAA5424	CSCF-PAP-890693	621[0n]	2			Yes				25-Apr-2013	Glaucopsyche alexis				Natural History Museum of Neuchatel
LEPAA	LEPAA168-16	GBIFCH-BOL_LEPAA_0168		BOLD:ACE9753	CSCF-PAP-890959	654[0n]	2			Yes				08-May-2013	Lysandra bellargus				Natural History Museum of Neuchatel
LEPAA	LEPAA169-16	GBIFCH-BOL_LEPAA_0169		BOLD:AAA9654	CSCF-PAP-891000	654[0n]	2			Yes				08-May-2013	Pseudophilotes baton				Natural History Museum of Neuchatel
LEPAA	LEPAA170-16	GBIFCH-BOL_LEPAA_0170		BOLD:AAB1120	CSCF-PAP-890571	642[0n]	2			Yes				13-Aug-2013	Coenonympha darwiniana				Natural History Museum of Neuchatel
LEPAA	LEPAA171-16	GBIFCH-BOL_LEPAA_0171		BOLD:AAB0049	CSCF-PAP-894310	582[0n]	2			Yes				07-May-2013	Callophrys rubi				Natural History Museum of Neuchatel
LEPAA	LEPAA172-16	GBIFCH-BOL_LEPAA_0172			CSCF-PAP-890617	0[n]				No				08-May-2013	Cupido alcetas				Natural History Museum of Neuchatel
LEPAA	LEPAA173-16	GBIFCH-BOL_LEPAA_0173		BOLD:AAA7351	CSCF-PAP-890585	594[0n]	2			No				08-May-2013	Coenonympha pamphilus				Natural History Museum of Neuchatel
LEPAA	LEPAA174-16	GBIFCH-BOL_LEPAA_0174			CSCF-PAP-890570	0[n]				No				18-Jun-2013	Coenonympha darwiniana				Natural History Museum of Neuchatel
LEPAA	LEPAA175-16	GBIFCH-BOL_LEPAA_0175		BOLD:ACF1425	CSCF-PAP-890569	654[0n]	2			Yes				13-Jun-2013	Coenonympha arcania				Natural History Museum of Neuchatel
LEPAA	LEPAA176-16	GBIFCH-BOL_LEPAA_0176		BOLD:AAB1329	CSCF-PAP-890553	654[0n]	2			Yes				25-Apr-2013	Carcharodus alceae				Natural History Museum of Neuchatel
LEPAA	LEPAA177-16	GBIFCH-BOL_LEPAA_0177		BOLD:AAB4283	CSCF-PAP-890678	654[0n]	2			Yes				05-Jul-2013	Erynnis tages				Natural History Museum of Neuchatel
LEPAA	LEPAA178-16	GBIFCH-BOL_LEPAA_0178		BOLD:AAB1429	CSCF-PAP-890780	627[0n]	2			Yes				04-Jul-2013	Phengaris arion				Natural History Museum of Neuchatel
LEPAA	LEPAA179-16	GBIFCH-BOL_LEPAA_0179		BOLD:ABZ3039	CSCF-PAP-893308	654[0n]	2			Yes				12-Aug-2013	Colias croceus				Natural History Museum of Neuchatel
LEPAA	LEPAA180-16	GBIFCH-BOL_LEPAA_0180		BOLD:AAB1747	CSCF-PAP-893317	654[0n]	2			Yes				01-Aug-2013	Boloria euphrosyne				Natural History Museum of Neuchatel
LEPAA	LEPAA181-16	GBIFCH-BOL_LEPAA_0181			CSCF-PAP-896437	0[n]				No				22-Jul-2013	Cupido alcetas				Natural History Museum of Neuchatel
LEPAA	LEPAA182-16	GBIFCH-BOL_LEPAA_0182		BOLD:AAB7639	CSCF-PAP-893211	654[0n]	2			Yes				01-Aug-2013	Pyrgus serratulae				Natural History Museum of Neuchatel
LEPAA	LEPAA183-16	GBIFCH-BOL_LEPAA_0183		BOLD:AAB8291	CSCF-PAP-896110	606[0n]	2			Yes				22-Jul-2013	Limenitis camilla				Natural History Museum of Neuchatel
LEPAA	LEPAA184-16	GBIFCH-BOL_LEPAA_0184		BOLD:AAA4515	CSCF-PAP-896111	633[0n]	2			Yes				07-Jun-2013	Pararge aegeria				Natural History Museum of Neuchatel
LEPAA	LEPAA185-16	GBIFCH-BOL_LEPAA_0185		BOLD:AAA9222	CSCF-PAP-896061	654[0n]	2			Yes				07-Jun-2013	Gonepteryx rhamni				Natural History Museum of Neuchatel
LEPAA	LEPAA186-16	GBIFCH-BOL_LEPAA_0186		BOLD:AAB0552	CSCF-PAP-896112	654[0n]	2			Yes				05-May-2013	Pieris brassicae				Natural History Museum of Neuchatel
LEPAA	LEPAA187-16	GBIFCH-BOL_LEPAA_0187		BOLD:AAB1133	CSCF-PAP-896568	618[0n]	2			Yes				05-May-2013	Anthocharis cardamines				Natural History Museum of Neuchatel
LEPAA	LEPAA188-16	GBIFCH-BOL_LEPAA_0188		BOLD:AAB9884	CSCF-PAP-893323	654[0n]	2			Yes				31-Jul-2013	Minois dryas				Natural History Museum of Neuchatel
LEPAA	LEPAA189-16	GBIFCH-BOL_LEPAA_0189		BOLD:AAA7663	CSCF-PAP-893550	654[0n]	2			Yes				17-May-2013	Celastrina argiolus				Natural History Museum of Neuchatel
LEPAA	LEPAA190-16	GBIFCH-BOL_LEPAA_0190		BOLD:AAB1329	CSCF-PAP-895731	585[0n]	2			Yes				27-May-2013	Carcharodus alceae				Natural History Museum of Neuchatel
LEPAA	LEPAA191-16	GBIFCH-BOL_LEPAA_0191		BOLD:AAA2224	CSCF-PAP-895603	654[0n]	2			Yes				07-May-2013	Pieris rapae				Natural History Museum of Neuchatel
LEPAA	LEPAA192-16	GBIFCH-BOL_LEPAA_0192		BOLD:AAC9448	CSCF-PAP-890994	636[0n]	2			Yes				21-Jul-2013	Pontia callidice				Natural History Museum of Neuchatel
LEPAA	LEPAA193-16	GBIFCH-BOL_LEPAA_0193		BOLD:ACF6090	CSCF-PAP-890969	654[0n]	2			Yes				30-Jul-2013	Polyommatus damon				Natural History Museum of Neuchatel
LEPAA	LEPAA194-16	GBIFCH-BOL_LEPAA_0194	97859	BOLD:AAC0976	CSCF-PAP-899012	594[0n]	2			Yes				01-Sep-2013	Hipparchia statilinus				Natural History Museum of Neuchatel
LEPAA	LEPAA195-16	GBIFCH-BOL_LEPAA_0195		BOLD:AAB1728	CSCF-PAP-893986	543[0n]	2			Yes				07-May-2013	Lycaena tityrus tityrus				Natural History Museum of Neuchatel
LEPAA	LEPAA196-16	GBIFCH-BOL_LEPAA_0196		BOLD:AAA5867	CSCF-PAP-894241	612[0n]	2			Yes				07-May-2013	Lycaena phlaeas				Natural History Museum of Neuchatel
LEPAA	LEPAA197-16	GBIFCH-BOL_LEPAA_0197		BOLD:AAA7663	CSCF-PAP-890563	654[0n]	2			Yes				18-Aug-2013	Celastrina argiolus				Natural History Museum of Neuchatel
LEPAA	LEPAA198-16	GBIFCH-BOL_LEPAA_0198		BOLD:AAB1340	CSCF-PAP-890652	636[0n]	2			Yes				18-Jun-2013	Erebia medusa				Natural History Museum of Neuchatel
LEPAA	LEPAA199-16	GBIFCH-BOL_LEPAA_0199		BOLD:AAC1666	CSCF-PAP-890970	654[0n]	2			Yes				25-Jul-2013	Polyommatus damon				Natural History Museum of Neuchatel
LEPAA	LEPAA200-16	GBIFCH-BOL_LEPAA_0200		BOLD:AAA8713	CSCF-PAP-890734	654[0n]	2			Yes				14-Apr-2013	Issoria lathonia				Natural History Museum of Neuchatel
LEPAA	LEPAA201-16	GBIFCH-BOL_LEPAA_0201		BOLD:AAB2322	CSCF-PAP-890475	654[0n]	2			Yes				31-Jul-2013	Speyeria agalaja				Natural History Museum of Neuchatel
LEPAA	LEPAA202-16	GBIFCH-BOL_LEPAA_0202		BOLD:AAA5321	CSCF-PAP-890944	654[0n]	2			Yes				30-Jul-2013	Agriades glandon				Natural History Museum of Neuchatel
LEPAA	LEPAA203-16	GBIFCH-BOL_LEPAA_0203		BOLD:AAA2226	CSCF-PAP-895968	654[0n]	2			Yes				05-May-2013	Pieris napi				Natural History Museum of Neuchatel
LEPAA	LEPAA204-16	GBIFCH-BOL_LEPAA_0204		BOLD:AAA2226	CSCF-PAP-893370	654[0n]	2			Yes				07-May-2013	Pieris napi				Natural History Museum of Neuchatel
LEPAA	LEPAA205-16	GBIFCH-BOL_LEPAA_0205		BOLD:AAB8019	CSCF-PAP-893618	573[0n]	2			Yes				01-Jul-2013	Favonius quercus				Natural History Museum of Neuchatel
LEPAA	LEPAA206-16	GBIFCH-BOL_LEPAA_0206		BOLD:AAA5337	CSCF-PAP-893520	621[0n]	2			Yes				17-May-2013	Vanessa cardui				Natural History Museum of Neuchatel
LEPAA	LEPAA207-16	GBIFCH-BOL_LEPAA_0207		BOLD:AAB4702	CSCF-PAP-890490	612[0n]	2			Yes				28-Aug-2013	Argynnis pandora				Natural History Museum of Neuchatel
LEPAA	LEPAA208-16	GBIFCH-BOL_LEPAA_0208		BOLD:AAB8731	CSCF-PAP-890708	654[0n]	2			Yes				09-May-2013	Hamearis lucina				Natural History Museum of Neuchatel
LEPAA	LEPAA209-16	GBIFCH-BOL_LEPAA_0209		BOLD:AAA7370	CSCF-PAP-890847	654[0n]	2			Yes				07-Aug-2013	Melitaea phoebe				Natural History Museum of Neuchatel
LEPAA	LEPAA210-16	GBIFCH-BOL_LEPAA_0210		BOLD:AAA8853	CSCF-PAP-893165	654[0n]	2			Yes				31-Jul-2013	Lasiommata maera				Natural History Museum of Neuchatel
LEPAA	LEPAA211-16	GBIFCH-BOL_LEPAA_0211		BOLD:AAD7474	CSCF-PAP-891054	654[0n]	2			Yes				30-Jul-2013	Zygaena exulans				Natural History Museum of Neuchatel
LEPAA	LEPAA212-16	GBIFCH-BOL_LEPAA_0212			CSCF-PAP-893206	0[n]				No				31-Jul-2013	Colias palaeno				Natural History Museum of Neuchatel
LEPAA	LEPAA213-16	GBIFCH-BOL_LEPAA_0213		BOLD:AAB0969	CSCF-PAP-893262	654[0n]	2			Yes				31-Jul-2013	Erebia epiphron				Natural History Museum of Neuchatel
LEPAA	LEPAA214-16	GBIFCH-BOL_LEPAA_0214	99670	BOLD:AAC0302	CSCF-PAP-899160	654[0n]	4			No				24-Sep-2013	Cacyreus marshalli				Natural History Museum of Neuchatel
LEPAA	LEPAA215-16	GBIFCH-BOL_LEPAA_0215		BOLD:ACE5088	CSCF-PAP-894002	654[0n]	2			Yes				07-Jun-2013	Pyrgus armoricanus				Natural History Museum of Neuchatel
LEPAA	LEPAA216-16	GBIFCH-BOL_LEPAA_0216		BOLD:ABZ6967	CSCF-PAP-906337	654[0n]	2			Yes				26-Jul-2013	Pyrgus alveus				Natural History Museum of Neuchatel
LEPAA	LEPAA217-16	GBIFCH-BOL_LEPAA_0217		BOLD:AAC0485	CSCF-PAP-892714	633[0n]	2			Yes				20-Sep-2013	Hipparchia fagi				Natural History Museum of Neuchatel
LEPAA	LEPAA218-16	GBIFCH-BOL_LEPAA_0218		BOLD:AAB3027	CSCF-PAP-890986	654[0n]	2			Yes				31-Jul-2013	Cyaniris semiargus				Natural History Museum of Neuchatel
LEPAA	LEPAA219-16	GBIFCH-BOL_LEPAA_0219		BOLD:AAA9082	CSCF-PAP-890620	654[0n]	2			Yes				09-May-2013	Cupido minimus				Natural History Museum of Neuchatel
LEPAA	LEPAA220-16	GBIFCH-BOL_LEPAA_0220	97425		CSCF-PAP-898978	0[n]				No				13-Sep-2013	Cacyreus marshalli				Natural History Museum of Neuchatel
LEPAA	LEPAA221-16	GBIFCH-BOL_LEPAA_0221		BOLD:ADD7831	CSCF-PAP-890638	587[0n]	2			Yes				07-Jul-2013	Erebia christi				Natural History Museum of Neuchatel
LEPAA	LEPAA222-16	GBIFCH-BOL_LEPAA_0222		BOLD:AAC0261	CSCF-PAP-890646	624[0n]	2			Yes				06-Aug-2013	Erebia gorge				Natural History Museum of Neuchatel
LEPAA	LEPAA223-16	GBIFCH-BOL_LEPAA_0223		BOLD:AAB1341	CSCF-PAP-890661	618[0n]	2			Yes				05-Jul-2013	Erebia oeme				Natural History Museum of Neuchatel
LEPAA	LEPAA224-16	GBIFCH-BOL_LEPAA_0224		BOLD:AAA9406	CSCF-PAP-890506	654[0n]	2			Yes				06-Aug-2013	Boloria aquilonaris				Natural History Museum of Neuchatel
LEPAA	LEPAA225-16	GBIFCH-BOL_LEPAA_0225		BOLD:ACE7514	CSCF-PAP-890515	654[0n]	2			Yes				31-Jul-2013	Boloria pales				Natural History Museum of Neuchatel
LEPAA	LEPAA226-16	GBIFCH-BOL_LEPAA_0226		BOLD:AAA9406	CSCF-PAP-890508	654[0n]	2			Yes				12-Jul-2013	Boloria aquilonaris				Natural History Museum of Neuchatel
LEPAA	LEPAA227-16	GBIFCH-BOL_LEPAA_0227		BOLD:AAJ0031	CSCF-PAP-890688	654[0n]	2			Yes				31-Jul-2013	Euphydryas cynthia				Natural History Museum of Neuchatel
LEPAA	LEPAA228-16	GBIFCH-BOL_LEPAA_0228		BOLD:AAA7508	CSCF-PAP-890691	654[0n]	2			Yes				31-Jul-2013	Euphydryas aurinia glaciegenita				Natural History Museum of Neuchatel
LEPAA	LEPAA229-16	GBIFCH-BOL_LEPAA_0229		BOLD:AAA3343	CSCF-PAP-890908	654[0n]	2			Yes				02-Jul-2013	Parnassius mnemosyne				Natural History Museum of Neuchatel
LEPAA	LEPAA230-16	GBIFCH-BOL_LEPAA_0230		BOLD:AAC4737	CSCF-PAP-891031	638[0n]	2			Yes				02-Jul-2013	Satyrus ferula				Natural History Museum of Neuchatel
LEPAA	LEPAA231-16	GBIFCH-BOL_LEPAA_0231		BOLD:AAA8773	CSCF-PAP-890453	624[0n]	2			Yes				05-Jul-2013	Aporia crataegi				Natural History Museum of Neuchatel
LEPAA	LEPAA232-16	GBIFCH-BOL_LEPAA_0232		BOLD:AAA8265	CSCF-PAP-890668	612[0n]	2			Yes				06-Aug-2013	Erebia pronoe vergy				Natural History Museum of Neuchatel
LEPAA	LEPAA233-16	GBIFCH-BOL_LEPAA_0233		BOLD:ACF0844	CSCF-PAP-890607	654[0n]	2			Yes				10-Aug-2013	Colias phicomone				Natural History Museum of Neuchatel
LEPAA	LEPAA234-16	GBIFCH-BOL_LEPAA_0234		BOLD:AAB8035	CSCF-PAP-890690	654[0n]	2			Yes				04-Jul-2013	Euphydryas intermedia				Natural History Museum of Neuchatel
LEPAA	LEPAA235-16	GBIFCH-BOL_LEPAA_0235		BOLD:AAA9312	CSCF-PAP-890540	654[0n]	2			Yes				12-Jul-2013	Brenthis ino				Natural History Museum of Neuchatel
LEPAA	LEPAA236-16	GBIFCH-BOL_LEPAA_0236		BOLD:AAA9312	CSCF-PAP-890539	594[0n]	2			Yes				15-Jul-2013	Brenthis ino				Natural History Museum of Neuchatel
LEPAA	LEPAA237-16	GBIFCH-BOL_LEPAA_0237		BOLD:AAA3082	CSCF-PAP-890830	585[0n]	2			Yes				05-Jul-2013	Melitaea diamina				Natural History Museum of Neuchatel
LEPAA	LEPAA238-16	GBIFCH-BOL_LEPAA_0238		BOLD:ABZ4903	CSCF-PAP-890974	552[0n]	2			Yes				01-Jul-2013	Polyommatus escheri				Natural History Museum of Neuchatel
LEPAA	LEPAA239-16	GBIFCH-BOL_LEPAA_0239		BOLD:ABX5016	CSCF-PAP-890973	549[0n]	2			No				15-Jul-2013	Polyommatus dorylas				Natural History Museum of Neuchatel
LEPAA	LEPAA240-16	GBIFCH-BOL_LEPAA_0240		BOLD:ACE7893	CSCF-PAP-890499	546[0n]	2			Yes				15-Jul-2013	Aricia artaxerxes				Natural History Museum of Neuchatel
LEPAA	LEPAA241-16	GBIFCH-BOL_LEPAA_0241		BOLD:AAB5172	CSCF-PAP-890948	654[0n]	2			Yes				31-Jul-2013	Agriades optilete				Natural History Museum of Neuchatel
LEPAA	LEPAA242-16	GBIFCH-BOL_LEPAA_0242		BOLD:ACS2433	CSCF-PAP-890524	654[0n]	2			Yes				12-Jul-2013	Boloria titania				Natural History Museum of Neuchatel
LEPAA	LEPAA243-16	GBIFCH-BOL_LEPAA_0243			CSCF-PAP-890667	0[n]				No				14-Aug-2013	Erebia pronoe				Natural History Museum of Neuchatel
LEPAA	LEPAA244-16	GBIFCH-BOL_LEPAA_0244		BOLD:AAC0485	CSCF-PAP-890716	654[0n]	2			Yes				12-Aug-2013	Hipparchia genava				Natural History Museum of Neuchatel
LEPAA	LEPAA245-16	GBIFCH-BOL_LEPAA_0245		BOLD:AAB1120	CSCF-PAP-890575	654[0n]	2			Yes				21-Jul-2013	Coenonympha gardetta				Natural History Museum of Neuchatel
LEPAA	LEPAA246-16	GBIFCH-BOL_LEPAA_0246		BOLD:ABX6141	CSCF-PAP-890710	654[0n]	2			Yes				10-Aug-2013	Hesperia comma				Natural History Museum of Neuchatel
LEPAA	LEPAA247-16	GBIFCH-BOL_LEPAA_0247		BOLD:ABY9182	CSCF-PAP-890486	654[0n]	2			Yes				10-Aug-2013	Fabriciana niobe				Natural History Museum of Neuchatel
LEPAA	LEPAA248-16	GBIFCH-BOL_LEPAA_0248		BOLD:AAA9406	CSCF-PAP-890513	654[0n]	2			Yes				12-Aug-2013	Boloria napaea				Natural History Museum of Neuchatel
LEPAA	LEPAA249-16	GBIFCH-BOL_LEPAA_0249		BOLD:AAA9312	CSCF-PAP-890538	654[0n]	2			Yes				10-Aug-2013	Brenthis ino				Natural History Museum of Neuchatel
LEPAA	LEPAA250-16	GBIFCH-BOL_LEPAA_0250		BOLD:AAD5447	CSCF-PAP-891053	654[0n]	2			Yes				02-Jul-2013	Zygaena ephialtes				Natural History Museum of Neuchatel
LEPAA	LEPAA251-16	GBIFCH-BOL_LEPAA_0251		BOLD:AAB4864	CSCF-PAP-893380	654[0n]	2			Yes				18-Jun-2013	Ochlodes sylvanus				Natural History Museum of Neuchatel
LEPAA	LEPAA252-16	GBIFCH-BOL_LEPAA_0252		BOLD:AAC8126	CSCF-PAP-891074	654[0n]	2			Yes				15-Jul-2013	Zygaena viciae				Natural History Museum of Neuchatel
LEPAA	LEPAA253-16	GBIFCH-BOL_LEPAA_0253		BOLD:ACE5091	CSCF-PAP-891016	564[0n]	2			Yes				14-Aug-2013	Pyrgus carlinae				Natural History Museum of Neuchatel
LEPAA	LEPAA254-16	GBIFCH-BOL_LEPAA_0254		BOLD:AAE2578	CSCF-PAP-890852	654[0n]	2			Yes				31-Jul-2013	Melitaea varia				Natural History Museum of Neuchatel
LEPAA	LEPAA255-16	GBIFCH-BOL_LEPAA_0255		BOLD:AAB3518	CSCF-PAP-890789	623[0n]	2			Yes				15-Jul-2013	Phengaris nausithous				Natural History Museum of Neuchatel
LEPAA	LEPAA256-16	GBIFCH-BOL_LEPAA_0256		BOLD:AAB1429	CSCF-PAP-890781	654[0n]	2			Yes				15-Jul-2013	Phengaris arion				Natural History Museum of Neuchatel
LEPAA	LEPAA257-16	GBIFCH-BOL_LEPAA_0257		BOLD:AAA5321	CSCF-PAP-890940	654[0n]	2			Yes				10-Aug-2013	Agriades glandon				Natural History Museum of Neuchatel
LEPAA	LEPAA258-16	GBIFCH-BOL_LEPAA_0258		BOLD:ACE6328	CSCF-PAP-890790	654[0n]	2			Yes				15-Jul-2013	Phengaris teleius				Natural History Museum of Neuchatel
LEPAA	LEPAA259-16	GBIFCH-BOL_LEPAA_0259		BOLD:AAA3800	CSCF-PAP-890760	654[0n]	2			Yes				24-Jul-2013	Limenitis reducta				Natural History Museum of Neuchatel
LEPAA	LEPAA260-16	GBIFCH-BOL_LEPAA_0260		BOLD:AAF0097	CSCF-PAP-890666	654[0n]	2			Yes				12-Aug-2013	Erebia pluto				Natural History Museum of Neuchatel
LEPAA	LEPAA261-16	GBIFCH-BOL_LEPAA_0261		BOLD:AAF0158	CSCF-PAP-890657	654[0n]	2			Yes				10-Aug-2013	Erebia mnestra				Natural History Museum of Neuchatel
LEPAA	LEPAA262-16	GBIFCH-BOL_LEPAA_0262		BOLD:AAB3509	CSCF-PAP-893617	589[0n]	2			Yes				07-May-2013	Nymphalis polychloros				Natural History Museum of Neuchatel
LEPAA	LEPAA263-16	GBIFCH-BOL_LEPAA_0263		BOLD:AAB3509	CSCF-PAP-890868	583[0n]	2			Yes				22-Mar-2013	Nymphalis polychloros				Natural History Museum of Neuchatel
LEPAA	LEPAA264-16	GBIFCH-BOL_LEPAA_0264		BOLD:AAA9652	CSCF-PAP-890392	654[0n]	2			Yes				01-Apr-2013	Aglais urticae				Natural History Museum of Neuchatel
LEPAA	LEPAA265-16	GBIFCH-BOL_LEPAA_0265		BOLD:AAA9652	CSCF-PAP-890390	654[0n]	2			Yes				22-Mar-2013	Aglais urticae				Natural History Museum of Neuchatel
LEPAA	LEPAA266-16	GBIFCH-BOL_LEPAA_0266		BOLD:AAB1429	CSCF-PAP-890779	654[0n]	2			Yes				10-Aug-2013	Phengaris arion				Natural History Museum of Neuchatel
LEPAA	LEPAA267-16	GBIFCH-BOL_LEPAA_0267		BOLD:ABZ4316	CSCF-PAP-890971	654[0n]	2			Yes				26-Jul-2013	Polyommatus daphnis				Natural History Museum of Neuchatel
LEPAA	LEPAA268-16	GBIFCH-BOL_LEPAA_0268		BOLD:ABY7043	CSCF-PAP-890952	654[0n]	2			Yes				24-Apr-2013	Polygonia c-album				Natural History Museum of Neuchatel
LEPAA	LEPAA269-16	GBIFCH-BOL_LEPAA_0269		BOLD:AAB1133	CSCF-PAP-890420	555[0n]	2			Yes				16-Apr-2013	Anthocharis cardamines				Natural History Museum of Neuchatel
LEPAA	LEPAA270-16	GBIFCH-BOL_LEPAA_0270		BOLD:ABY7043	CSCF-PAP-890951	630[0n]	2			Yes				16-Apr-2013	Polygonia c-album				Natural History Museum of Neuchatel
LEPAA	LEPAA271-16	GBIFCH-BOL_LEPAA_0271		BOLD:AAA9222	CSCF-PAP-890696	612[0n]	2			Yes				22-Mar-2013	Gonepteryx rhamni				Natural History Museum of Neuchatel
LEPAA	LEPAA272-16	GBIFCH-BOL_LEPAA_0272		BOLD:AAB2272	CSCF-PAP-893626	654[0n]	2			Yes				07-May-2013	Iphiclides podalirius				Natural History Museum of Neuchatel
LEPAA	LEPAA273-16	GBIFCH-BOL_LEPAA_0273		BOLD:AAA3343	CSCF-PAP-890907	630[0n]	2			Yes				08-May-2013	Parnassius mnemosyne				Natural History Museum of Neuchatel
LEPAA	LEPAA274-16	GBIFCH-BOL_LEPAA_0274		BOLD:AAA8773	CSCF-PAP-890452	591[0n]	2			Yes				13-Jun-2013	Aporia crataegi				Natural History Museum of Neuchatel
LEPAA	LEPAA275-16	GBIFCH-BOL_LEPAA_0275		BOLD:AAB2272	CSCF-PAP-890729	630[0n]	2			No				25-Apr-2013	Iphiclides podalirius				Natural History Museum of Neuchatel
LEPAA	LEPAA276-16	GBIFCH-BOL_LEPAA_0276		BOLD:AAA5810	CSCF-PAP-890882	621[0n]	2			Yes				16-Apr-2013	Papilio machaon				Natural History Museum of Neuchatel
LEPAA	LEPAA277-16	GBIFCH-BOL_LEPAA_0277		BOLD:ABZ3039	CSCF-PAP-890594	654[0n]	2			Yes				16-Apr-2013	Colias croceus				Natural History Museum of Neuchatel
LEPAA	LEPAA278-16	GBIFCH-BOL_LEPAA_0278		BOLD:AAA5531	CSCF-PAP-890600	654[0n]	2			Yes				06-Jun-2013	Colias hyale				Natural History Museum of Neuchatel
LEPAA	LEPAA279-16	GBIFCH-BOL_LEPAA_0279		BOLD:ABZ4715	CSCF-PAP-890591	624[0n]	2			Yes				25-Apr-2013	Colias alfacariensis				Natural History Museum of Neuchatel
LEPAA	LEPAA280-16	GBIFCH-BOL_LEPAA_0280		BOLD:AAA2225	CSCF-PAP-890997	654[0n]	2			Yes				16-Apr-2013	Pontia edusa				Natural History Museum of Neuchatel
LEPAA	LEPAA281-16	GBIFCH-BOL_LEPAA_0281		BOLD:AAA2224	CSCF-PAP-890932	552[0n]	2			Yes				16-Apr-2013	Pieris rapae				Natural History Museum of Neuchatel
LEPAA	LEPAA282-16	GBIFCH-BOL_LEPAA_0282		BOLD:AAA2226	CSCF-PAP-890920	654[0n]	2			Yes				24-Apr-2013	Pieris napi				Natural History Museum of Neuchatel
LEPAA	LEPAA283-16	GBIFCH-BOL_LEPAA_0283			CSCF-PAP-913035	0[n]				No				31-Jul-2013	Parnassius apollo				Natural History Museum of Neuchatel
LEPAA	LEPAA284-16	GBIFCH-BOL_LEPAA_0284		BOLD:AAA7166	CSCF-PAP-913017	594[0n]	2			No				04-Jun-2013	Nymphalis antiopa				Natural History Museum of Neuchatel
LEPAA	LEPAA285-16	GBIFCH-BOL_LEPAA_0285		BOLD:AAB3509	CSCF-PAP-913018	594[0n]	2			Yes				11-Aug-2013	Nymphalis polychloros				Natural History Museum of Neuchatel
LEPAA	LEPAA286-16	GBIFCH-BOL_LEPAA_0286		BOLD:AAA8638	CSCF-PAP-913195	594[0n]	2			No				31-Jul-2013	Vanessa atalanta				Natural History Museum of Neuchatel
LEPAA	LEPAA287-16	GBIFCH-BOL_LEPAA_0287		BOLD:AAA5337	CSCF-PAP-913198	630[0n]	2			Yes				11-Aug-2013	Vanessa cardui				Natural History Museum of Neuchatel
LEPAA	LEPAA288-16	GBIFCH-BOL_LEPAA_0288		BOLD:AAB9884	CSCF-PAP-913014	654[0n]	2			Yes				01-Sep-2013	Minois dryas				Natural History Museum of Neuchatel
LEPAA	LEPAA289-16	GBIFCH-BOL_LEPAA_0289		BOLD:AAA8773	CSCF-PAP-912673	615[0n]	2			Yes				04-Jul-2013	Aporia crataegi				Natural History Museum of Neuchatel
LEPAA	LEPAA290-16	GBIFCH-BOL_LEPAA_0290		BOLD:AAB0552	CSCF-PAP-913039	654[0n]	2			Yes				04-Jul-2013	Pieris brassicae				Natural History Museum of Neuchatel
LEPAA	LEPAA291-16	GBIFCH-BOL_LEPAA_0291		BOLD:AAA7351	CSCF-PAP-912768	566[0n]	2			Yes				04-Jun-2013	Coenonympha pamphilus				Natural History Museum of Neuchatel
LEPAA	LEPAA292-16	GBIFCH-BOL_LEPAA_0292			CSCF-PAP-912913	0[n]				No				04-Jun-2013	Erynnis tages				Natural History Museum of Neuchatel
LEPAA	LEPAA293-16	GBIFCH-BOL_LEPAA_0293		BOLD:AAD5110	CSCF-PAP-912647	654[0n]	2			Yes				31-Jul-2013	Adscita alpina				Natural History Museum of Neuchatel
LEPAA	LEPAA294-16	GBIFCH-BOL_LEPAA_0294		BOLD:AAB2344	CSCF-PAP-912676	654[0n]	2			Yes				11-Aug-2013	Fabriciana adippe				Natural History Museum of Neuchatel
LEPAA	LEPAA295-16	GBIFCH-BOL_LEPAA_0295		BOLD:AAA8958	CSCF-PAP-912690	593[0n]	2			Yes				31-Jul-2013	Argynnis paphia				Natural History Museum of Neuchatel
LEPAA	LEPAA296-16	GBIFCH-BOL_LEPAA_0296		BOLD:ABY9182	CSCF-PAP-912687	615[0n]	2			Yes				15-Jul-2013	Fabriciana niobe				Natural History Museum of Neuchatel
LEPAA	LEPAA297-16	GBIFCH-BOL_LEPAA_0297		BOLD:AAB2322	CSCF-PAP-912680	654[0n]	2			Yes				15-Jul-2013	Speyeria agalaja				Natural History Museum of Neuchatel
LEPAA	LEPAA298-16	GBIFCH-BOL_LEPAA_0298		BOLD:ABZ3039	CSCF-PAP-912773	654[0n]	2			Yes				11-Aug-2013	Colias croceus				Natural History Museum of Neuchatel
LEPAA	LEPAA299-16	GBIFCH-BOL_LEPAA_0299		BOLD:AAA2226	CSCF-PAP-913056	654[0n]	2			Yes				15-Jul-2013	Pieris napi				Natural History Museum of Neuchatel
LEPAA	LEPAA300-16	GBIFCH-BOL_LEPAA_0300		BOLD:AAA7785	CSCF-PAP-912973	654[0n]	2			Yes				15-Jul-2013	Maniola jurtina				Natural History Museum of Neuchatel
LEPAA	LEPAA301-16	GBIFCH-BOL_LEPAA_0301		BOLD:AAA4515	CSCF-PAP-913032	534[1n]	2			Yes				04-Jun-2013	Pararge aegeria				Natural History Museum of Neuchatel
LEPAA	LEPAA302-16	GBIFCH-BOL_LEPAA_0302		BOLD:AAA7584	CSCF-PAP-912990	654[0n]	2			Yes				06-Jul-2013	Melitaea nevadensis				Natural History Museum of Neuchatel
LEPAA	LEPAA303-16	GBIFCH-BOL_LEPAA_0303		BOLD:AAA7584	CSCF-PAP-912991	615[0n]	2			Yes				18-Jun-2013	Melitaea nevadensis				Natural History Museum of Neuchatel
LEPAA	LEPAA304-16	GBIFCH-BOL_LEPAA_0304		BOLD:AAB1120	CSCF-PAP-912750	645[0n]	2			Yes				27-Jul-2013	Coenonympha darwiniana				Natural History Museum of Neuchatel
LEPAA	LEPAA305-16	GBIFCH-BOL_LEPAA_0305		BOLD:AAB1120	CSCF-PAP-912756	654[0n]	2			Yes				06-Jul-2013	Coenonympha darwiniana				Natural History Museum of Neuchatel
LEPAA	LEPAA306-16	GBIFCH-BOL_LEPAA_0306		BOLD:AAB1120	CSCF-PAP-912749	654[0n]	2			Yes				23-Jun-2013	Coenonympha darwiniana				Natural History Museum of Neuchatel
LEPAA	LEPAA307-16	GBIFCH-BOL_LEPAA_0307			CSCF-PAP-912957	0[n]				No				11-Jul-2013	Lycaena phlaeas				Natural History Museum of Neuchatel
LEPAA	LEPAA308-16	GBIFCH-BOL_LEPAA_0308		BOLD:ABY9182	CSCF-PAP-912688	654[0n]	2			Yes				07-Aug-2013	Fabriciana niobe				Natural History Museum of Neuchatel
LEPAA	LEPAA309-16	GBIFCH-BOL_LEPAA_0309		BOLD:AAB2344	CSCF-PAP-912678	624[0n]	2			Yes				23-Jul-2013	Fabriciana adippe				Natural History Museum of Neuchatel
LEPAA	LEPAA310-16	GBIFCH-BOL_LEPAA_0310		BOLD:AAB9154	CSCF-PAP-912899	654[0n]	2			Yes				07-Jun-2013	Erebia triaria				Natural History Museum of Neuchatel
LEPAA	LEPAA311-16	GBIFCH-BOL_LEPAA_0311			CSCF-PAP-912867	0[n]				No				26-Jul-2013	Erebia montana				Natural History Museum of Neuchatel
LEPAA	LEPAA312-16	GBIFCH-BOL_LEPAA_0312		BOLD:ACF5881	CSCF-PAP-912896	633[0n]	2			Yes				03-Sep-2013	Erebia pronoe psathura				Natural History Museum of Neuchatel
LEPAA	LEPAA313-16	GBIFCH-BOL_LEPAA_0313		BOLD:AAB3455	CSCF-PAP-912796	654[0n]	2			Yes				23-Jul-2013	Erebia aethiops				Natural History Museum of Neuchatel
LEPAA	LEPAA314-16	GBIFCH-BOL_LEPAA_0314		BOLD:AAB3453	CSCF-PAP-912906	654[0n]	2			Yes				10-Aug-2013	Erebia tyndarus				Natural History Museum of Neuchatel
LEPAA	LEPAA315-16	GBIFCH-BOL_LEPAA_0315		BOLD:ABA8687	CSCF-PAP-912800	654[0n]	2			Yes				06-Jul-2013	Erebia alberganus				Natural History Museum of Neuchatel
LEPAA	LEPAA316-16	GBIFCH-BOL_LEPAA_0316		BOLD:AAB1747	CSCF-PAP-912708	654[0n]	2			Yes				06-Jul-2013	Boloria euphrosyne				Natural History Museum of Neuchatel
LEPAA	LEPAA317-16	GBIFCH-BOL_LEPAA_0317		BOLD:AAB4864	CSCF-PAP-913021	633[0n]	2			Yes				26-Jul-2013	Ochlodes sylvanus				Natural History Museum of Neuchatel
LEPAA	LEPAA318-16	GBIFCH-BOL_LEPAA_0318		BOLD:AAA8713	CSCF-PAP-912937	516[0n]	2			Yes				19-Jul-2013	Issoria lathonia				Natural History Museum of Neuchatel
LEPAA	LEPAA319-16	GBIFCH-BOL_LEPAA_0319		BOLD:ACF1425	CSCF-PAP-912736	654[0n]	2			Yes				21-Jun-2013	Coenonympha arcania				Natural History Museum of Neuchatel
LEPAA	LEPAA320-16	GBIFCH-BOL_LEPAA_0320			CSCF-PAP-913055	0[n]				No				11-Jul-2013	Pieris napi				Natural History Museum of Neuchatel
LEPAA	LEPAA321-16	GBIFCH-BOL_LEPAA_0321			CSCF-PAP-913031	0[n]				No				22-Aug-2013	Pararge aegeria				Natural History Museum of Neuchatel
LEPAA	LEPAA322-16	GBIFCH-BOL_LEPAA_0322		BOLD:AAB9884	CSCF-PAP-913012	654[0n]	2			Yes				10-Aug-2013	Minois dryas				Natural History Museum of Neuchatel
LEPAA	LEPAA323-16	GBIFCH-BOL_LEPAA_0323		BOLD:ABZ3039	CSCF-PAP-912772	594[0n]	2			Yes				22-Aug-2013	Colias croceus				Natural History Museum of Neuchatel
LEPAA	LEPAA324-16	GBIFCH-BOL_LEPAA_0324		BOLD:AAA6940	CSCF-PAP-912975	654[0n]	2			Yes				11-Jul-2013	Melanargia galathea				Natural History Museum of Neuchatel
LEPAA	LEPAA325-16	GBIFCH-BOL_LEPAA_0325		BOLD:AAC0485	CSCF-PAP-912933	654[0n]	2			Yes				19-Jul-2013	Hipparchia fagi				Natural History Museum of Neuchatel
LEPAA	LEPAA326-16	GBIFCH-BOL_LEPAA_0326		BOLD:AAA8773	CSCF-PAP-913048	654[0n]	2			Yes				21-Jun-2013	Aporia crataegi				Natural History Museum of Neuchatel
LEPAA	LEPAA327-16	GBIFCH-BOL_LEPAA_0327		BOLD:AAC0302	CSCF-PAP-912729	654[0n]	2			Yes				19-Sep-2013	Cacyreus marshalli				Natural History Museum of Neuchatel
LEPAA	LEPAA328-16	GBIFCH-BOL_LEPAA_0328			CSCF-PAP-912734	0[n]				No				11-Jul-2013	Celastrina argiolus				Natural History Museum of Neuchatel
LEPAA	LEPAA329-16	GBIFCH-BOL_LEPAA_0329		BOLD:AAA8264	CSCF-PAP-912821	648[0n]	2			Yes				16-Jul-2013	Erebia euryale				Natural History Museum of Neuchatel
LEPAA	LEPAA330-16	GBIFCH-BOL_LEPAA_0330		BOLD:AAB1340	CSCF-PAP-912839	654[0n]	2			Yes				16-Jul-2013	Erebia medusa				Natural History Museum of Neuchatel
LEPAA	LEPAA331-16	GBIFCH-BOL_LEPAA_0331		BOLD:ACF5881	CSCF-PAP-912897	654[0n]	2			Yes				21-Aug-2013	Erebia pronoe psathura				Natural History Museum of Neuchatel
LEPAA	LEPAA332-16	GBIFCH-BOL_LEPAA_0332		BOLD:AAB3453	CSCF-PAP-912900	654[0n]	2			Yes				16-Jul-2013	Erebia tyndarus				Natural History Museum of Neuchatel
LEPAA	LEPAA333-16	GBIFCH-BOL_LEPAA_0333		BOLD:AAB1120	CSCF-PAP-912738	654[0n]	2			Yes				04-Jul-2013	Coenonympha darwiniana				Natural History Museum of Neuchatel
LEPAA	LEPAA334-16	GBIFCH-BOL_LEPAA_0334		BOLD:AAB1120	CSCF-PAP-912754	612[0n]	2			Yes				25-Jul-2013	Coenonympha darwiniana				Natural History Museum of Neuchatel
LEPAA	LEPAA335-16	GBIFCH-BOL_LEPAA_0335		BOLD:AAB1120	CSCF-PAP-912753	654[0n]	2			Yes				16-Jul-2013	Coenonympha darwiniana				Natural History Museum of Neuchatel
LEPAA	LEPAA336-16	GBIFCH-BOL_LEPAA_0336		BOLD:AAE6704	CSCF-PAP-913242	654[0n]	2			Yes				16-Jul-2013	Zygaena purpuralis				Natural History Museum of Neuchatel
LEPAA	LEPAA337-16	GBIFCH-BOL_LEPAA_0337		BOLD:ABY4365	CSCF-PAP-912661	654[0n]	2			Yes				16-Jul-2013	Adscita geryon				Natural History Museum of Neuchatel
LEPAA	LEPAA338-16	GBIFCH-BOL_LEPAA_0338		BOLD:AAD5110	CSCF-PAP-912642	654[0n]	2			Yes				16-Jul-2013	Adscita alpina				Natural History Museum of Neuchatel
LEPAA	LEPAA339-16	GBIFCH-BOL_LEPAA_0339		BOLD:AAB3454	CSCF-PAP-909097	639[0n]	2			Yes				21-Jul-2013	Erebia pandrose				Natural History Museum of Neuchatel
LEPAA	LEPAA340-16	GBIFCH-BOL_LEPAA_0340		BOLD:AAB0123	CSCF-PAP-909088	654[0n]	2			Yes				18-Aug-2013	Lasiommata megera				Natural History Museum of Neuchatel
LEPAA	LEPAA341-16	GBIFCH-BOL_LEPAA_0341		BOLD:AAB3455	CSCF-PAP-909089	615[0n]	2			Yes				07-Aug-2013	Erebia aethiops				Natural History Museum of Neuchatel
LEPAA	LEPAA342-16	GBIFCH-BOL_LEPAA_0342		BOLD:AAC0261	CSCF-PAP-909096	654[0n]	2			Yes				21-Jul-2013	Erebia gorge				Natural History Museum of Neuchatel
LEPAA	LEPAA343-16	GBIFCH-BOL_LEPAA_0343		BOLD:ABA8687	CSCF-PAP-909090	654[0n]	2			Yes				30-Jul-2013	Erebia alberganus				Natural History Museum of Neuchatel
LEPAA	LEPAA344-16	GBIFCH-BOL_LEPAA_0344		BOLD:AAB0049	CSCF-PAP-909099	624[0n]	2			Yes				25-Apr-2013	Callophrys rubi				Natural History Museum of Neuchatel
LEPAA	LEPAA345-16	GBIFCH-BOL_LEPAA_0345		BOLD:ADL8106	CSCF-PAP-909094	654[0n]	2			Yes				01-Sep-2013	Zygaena transalpina				Natural History Museum of Neuchatel
LEPAA	LEPAA346-16	GBIFCH-BOL_LEPAA_0346		BOLD:AAD7508	CSCF-PAP-909093	654[0n]	2			Yes				30-Jul-2013	Zygaena lonicerae				Natural History Museum of Neuchatel
LEPAA	LEPAA347-16	GBIFCH-BOL_LEPAA_0347		BOLD:AAB3518	CSCF-PAP-909086	654[0n]	2			Yes				31-Jul-2013	Phengaris nausithous				Natural History Museum of Neuchatel
LEPAA	LEPAA348-16	GBIFCH-BOL_LEPAA_0348		BOLD:AAA3303	CSCF-PAP-909087	642[0n]	2			Yes				26-Jul-2013	Polyommatus icarus				Natural History Museum of Neuchatel
LEPAA	LEPAA349-16	GBIFCH-BOL_LEPAA_0349			CSCF-PAP-909098	225[0n]	1			No				05-Jul-2013	Cupido osiris				Natural History Museum of Neuchatel
LEPAA	LEPAA350-16	GBIFCH-BOL_LEPAA_0350		BOLD:ACE7893	CSCF-PAP-909100	654[0n]	2			Yes				04-Aug-2013	Aricia artaxerxes				Natural History Museum of Neuchatel
LEPAA	LEPAA351-16	GBIFCH-BOL_LEPAA_0351		BOLD:AAA6760	CSCF-PAP-909092	654[0n]	2			Yes				30-Jul-2013	Thymelicus lineola				Natural History Museum of Neuchatel
LEPAA	LEPAA352-16	GBIFCH-BOL_LEPAA_0352		BOLD:AAB3027	CSCF-PAP-909091	654[0n]	2			Yes				30-Jul-2013	Cyaniris semiargus				Natural History Museum of Neuchatel
LEPAA	LEPAA353-16	GBIFCH-BOL_LEPAA_0353		BOLD:AAB1329	CSCF-PAP-909103	654[0n]	4			No				16-Aug-2013	Carcharodus alceae				Natural History Museum of Neuchatel
LEPAA	LEPAA354-16	GBIFCH-BOL_LEPAA_0354		BOLD:AAB5172	CSCF-PAP-909104	654[0n]	2			Yes				03-Aug-2013	Agriades optilete				Natural History Museum of Neuchatel
LEPAA	LEPAA355-16	GBIFCH-BOL_LEPAA_0355			CSCF-PAP-895629	0[n]				No				07-May-2013	Pieris napi				Natural History Museum of Neuchatel
LEPAA	LEPAA356-16	GBIFCH-BOL_LEPAA_0356	2013-063	BOLD:ABZ6967	CSCF-PAP-910698	654[0n]	2			Yes				01-Aug-2013	Pyrgus warrenensis				Natural History Museum of Neuchatel
LEPAA	LEPAA357-16	GBIFCH-BOL_LEPAA_0357	2013-056	BOLD:ACE9283	CSCF-PAP-910699	654[0n]	2			Yes				26-Jul-2013	Pyrgus andromedae				Natural History Museum of Neuchatel
LEPAA	LEPAA358-16	GBIFCH-BOL_LEPAA_0358	2013-047	BOLD:ACE7893	CSCF-PAP-910676	654[0n]	2			Yes				21-Jul-2013	Aricia artaxerxes				Natural History Museum of Neuchatel
LEPAA	LEPAA359-16	GBIFCH-BOL_LEPAA_0359	2013-052	BOLD:ACE7514	CSCF-PAP-910644	630[0n]	2			Yes				26-Jul-2013	Boloria pales				Natural History Museum of Neuchatel
LEPAA	LEPAA360-16	GBIFCH-BOL_LEPAA_0360	95883	BOLD:AAC3322	CSCF-PAP-898801	630[0n]	2			Yes				01-Jul-2013	Carcharodus floccifera				Natural History Museum of Neuchatel
LEPAA	LEPAA361-16	GBIFCH-BOL_LEPAA_0361	2013-016	BOLD:AAB1120	CSCF-PAP-910646	654[0n]	2			Yes				14-Jul-2013	Coenonympha gardetta				Natural History Museum of Neuchatel
LEPAA	LEPAA362-16	GBIFCH-BOL_LEPAA_0362	2013-031	BOLD:AAA5337	CSCF-PAP-910704	633[0n]	2			Yes				21-Jul-2013	Vanessa cardui				Natural History Museum of Neuchatel
LEPAA	LEPAA363-16	GBIFCH-BOL_LEPAA_0363	2013-003	BOLD:ACS2433	CSCF-PAP-910678	654[0n]	2			Yes				21-Jul-2013	Boloria titania				Natural History Museum of Neuchatel
LEPAA	LEPAA364-16	GBIFCH-BOL_LEPAA_0364	95753	BOLD:AAA7785	CSCF-PAP-898742	633[0n]	2			Yes				30-Jun-2013	Maniola jurtina				Natural History Museum of Neuchatel
LEPAA	LEPAA365-16	GBIFCH-BOL_LEPAA_0365	2013-081	BOLD:AAC1666	CSCF-PAP-910697	630[0n]	2			Yes				01-Aug-2013	Polyommatus damon				Natural History Museum of Neuchatel
LEPAA	LEPAA366-16	GBIFCH-BOL_LEPAA_0366	2013-004	BOLD:AAA6267	CSCF-PAP-910679	621[0n]	2			Yes				14-Jul-2013	Carterocephalus palaemon				Natural History Museum of Neuchatel
LEPAA	LEPAA367-16	GBIFCH-BOL_LEPAA_0367	2013-082	BOLD:AAB4864	CSCF-PAP-910692	654[0n]	2			Yes				01-Aug-2013	Ochlodes sylvanus				Natural History Museum of Neuchatel
LEPAA	LEPAA368-16	GBIFCH-BOL_LEPAA_0368	2013-029	BOLD:AAC4588	CSCF-PAP-910702	654[0n]	2			Yes				14-Jul-2013	Spialia sertorius				Natural History Museum of Neuchatel
LEPAA	LEPAA369-16	GBIFCH-BOL_LEPAA_0369	2013-085	BOLD:AAB1940	CSCF-PAP-910674	600[0n]	2			Yes				01-Aug-2013	Aphantopus hyperantus				Natural History Museum of Neuchatel
LEPAA	LEPAA370-16	GBIFCH-BOL_LEPAA_0370	2013-057		CSCF-PAP-910680	0[n]				No				01-Aug-2013	Coenonympha pamphilus				Natural History Museum of Neuchatel
LEPAA	LEPAA371-16	GBIFCH-BOL_LEPAA_0371	93305	BOLD:AAA6940	CSCF-PAP-898401	654[0n]	2			Yes				30-Jun-2013	Melanargia galathea				Natural History Museum of Neuchatel
LEPAA	LEPAA372-16	GBIFCH-BOL_LEPAA_0372	95884	BOLD:AAA3303	CSCF-PAP-898802	642[0n]	2			Yes				01-Jul-2013	Polyommatus icarus				Natural History Museum of Neuchatel
LEPAA	LEPAA373-16	GBIFCH-BOL_LEPAA_0373	95878	BOLD:AAA9406	CSCF-PAP-898796	654[0n]	2			Yes				01-Jul-2013	Boloria aquilonaris				Natural History Museum of Neuchatel
LEPAA	LEPAA374-16	GBIFCH-BOL_LEPAA_0374	2013-094	BOLD:AAA7785	CSCF-PAP-910689	654[0n]	2			Yes				01-Aug-2013	Maniola jurtina				Natural History Museum of Neuchatel
LEPAA	LEPAA375-16	GBIFCH-BOL_LEPAA_0375	2013-075	BOLD:AAA3303	CSCF-PAP-910658	654[0n]	2			Yes				26-Jul-2013	Polyommatus eros				Natural History Museum of Neuchatel
LEPAA	LEPAA376-16	GBIFCH-BOL_LEPAA_0376	2013-044	BOLD:AAB0049	CSCF-PAP-910645	615[0n]	2			Yes				21-Jul-2013	Callophrys rubi				Natural History Museum of Neuchatel
LEPAA	LEPAA377-16	GBIFCH-BOL_LEPAA_0377	2013-067	BOLD:AAA6761	CSCF-PAP-910703	654[0n]	2			Yes				01-Aug-2013	Thymelicus sylvestris				Natural History Museum of Neuchatel
LEPAA	LEPAA378-16	GBIFCH-BOL_LEPAA_0378	95767	BOLD:AAA7508	CSCF-PAP-898746	609[0n]	2			Yes				30-Jun-2013	Euphydryas aurinia aurinia				Natural History Museum of Neuchatel
LEPAA	LEPAA379-16	GBIFCH-BOL_LEPAA_0379	95895	BOLD:AAB8947	CSCF-PAP-898811	603[0n]	2			Yes				01-Jul-2013	Lycaena hippothoe eurydice				Natural History Museum of Neuchatel
LEPAA	LEPAA380-16	GBIFCH-BOL_LEPAA_0380	95912	BOLD:AAA5115	CSCF-PAP-898828	633[0n]	2			Yes				01-Jul-2013	Boloria selene				Natural History Museum of Neuchatel
LEPAA	LEPAA381-16	GBIFCH-BOL_LEPAA_0381	2013-060	BOLD:ACE5091	CSCF-PAP-910667	630[0n]	2			Yes				01-Aug-2013	Pyrgus carlinae				Natural History Museum of Neuchatel
LEPAA	LEPAA382-16	GBIFCH-BOL_LEPAA_0382		BOLD:AAA3303	CSCF-PAP-906300	561[0n]	2			Yes				26-Jul-2013	Polyommatus eros				Natural History Museum of Neuchatel
LEPAA	LEPAA383-16	GBIFCH-BOL_LEPAA_0383			CSCF-PAP-893647	0[n]				No				07-May-2013	Leptidea sinapis				Natural History Museum of Neuchatel
LEPAA	LEPAA384-16	GBIFCH-BOL_LEPAA_0384		BOLD:ABZ4715	CSCF-PAP-894359	654[0n]	2			Yes				04-Jun-2013	Colias alfacariensis				Natural History Museum of Neuchatel
LEPAA	LEPAA385-16	GBIFCH-BOL_LEPAA_0385		BOLD:AAL0274	CSCF-PAP-912812	654[0n]	2			Yes				15-Jul-2013	Erebia eriphyle				Natural History Museum of Neuchatel
LEPAA	LEPAA386-16	GBIFCH-BOL_LEPAA_0386		BOLD:AAL0274	CSCF-PAP-912811	654[0n]	2			Yes				15-Jul-2013	Erebia eriphyle				Natural History Museum of Neuchatel
LEPAA	LEPAA387-16	GBIFCH-BOL_LEPAA_0387		BOLD:ABY4365	CSCF-PAP-912650	654[0n]	2			Yes				01-Aug-2013	Adscita geryon				Natural History Museum of Neuchatel
LEPAA	LEPAA388-16	GBIFCH-BOL_LEPAA_0388		BOLD:ABY4365	CSCF-PAP-912651	654[0n]	2			Yes				23-Jul-2013	Adscita geryon				Natural History Museum of Neuchatel
LEPAA	LEPAA389-16	GBIFCH-BOL_LEPAA_0389		BOLD:AAD5110	CSCF-PAP-912665	654[0n]	2			Yes				01-Jul-2013	Adscita statices				Natural History Museum of Neuchatel
LEPAA	LEPAA390-16	GBIFCH-BOL_LEPAA_0390		BOLD:AAB3703	CSCF-PAP-913116	654[0n]	2			Yes				23-Jul-2013	Polyommatus thersites				Natural History Museum of Neuchatel
LEPAA	LEPAA391-16	GBIFCH-BOL_LEPAA_0391		BOLD:AAL0274	CSCF-PAP-912810	654[0n]	2			Yes				26-Jul-2013	Erebia eriphyle				Natural History Museum of Neuchatel
LEPAA	LEPAA392-16	GBIFCH-BOL_LEPAA_0392		BOLD:AAL0274	CSCF-PAP-912808	654[0n]	2			Yes				27-Jul-2013	Erebia eriphyle				Natural History Museum of Neuchatel
LEPAA	LEPAA393-16	GBIFCH-BOL_LEPAA_0393		BOLD:AAA3628	CSCF-PAP-913080	654[0n]	2			Yes				27-Jul-2013	Plebejus idas				Natural History Museum of Neuchatel
LEPAA	LEPAA394-16	GBIFCH-BOL_LEPAA_0394			CSCF-PAP-912993	0[n]				No				07-Jul-2013	Melitaea athalia				Natural History Museum of Neuchatel
LEPAA	LEPAA395-16	GBIFCH-BOL_LEPAA_0395		BOLD:AAA8828	CSCF-PAP-913001	654[0n]	2			Yes				06-Aug-2013	Melitaea aurelia				Natural History Museum of Neuchatel
LEPAA	LEPAA396-16	GBIFCH-BOL_LEPAA_0396		BOLD:AAA3628	CSCF-PAP-913083	612[0n]	2			No				31-Jul-2013	Plebejus idas				Natural History Museum of Neuchatel
LEPAA	LEPAA397-16	GBIFCH-BOL_LEPAA_0397		BOLD:AAA3628	CSCF-PAP-913082	654[0n]	2			Yes				20-Jul-2013	Plebejus idas				Natural History Museum of Neuchatel
LEPAA	LEPAA398-16	GBIFCH-BOL_LEPAA_0398		BOLD:AAB1120	CSCF-PAP-912751	654[0n]	2			Yes				20-Jul-2013	Coenonympha darwiniana				Natural History Museum of Neuchatel
LEPAA	LEPAA399-16	GBIFCH-BOL_LEPAA_0399		BOLD:AAE6704	CSCF-PAP-913246	612[0n]	2			Yes				20-Jul-2013	Zygaena purpuralis				Natural History Museum of Neuchatel
LEPAA	LEPAA400-16	GBIFCH-BOL_LEPAA_0400		BOLD:AAE6704	CSCF-PAP-913234	654[0n]	2			Yes				07-Jul-2013	Zygaena purpuralis				Natural History Museum of Neuchatel
LEPAA	LEPAA401-16	GBIFCH-BOL_LEPAA_0401		BOLD:AAE6704	CSCF-PAP-913241	654[0n]	2			Yes				20-Jul-2013	Zygaena purpuralis				Natural History Museum of Neuchatel
LEPAA	LEPAA402-16	GBIFCH-BOL_LEPAA_0402		BOLD:ABY4365	CSCF-PAP-912657	546[0n]	2			No				22-Jul-2013	Adscita geryon				Natural History Museum of Neuchatel
LEPAA	LEPAA403-16	GBIFCH-BOL_LEPAA_0403		BOLD:ABY4365	CSCF-PAP-912656	654[0n]	2			Yes				20-Jul-2013	Adscita geryon				Natural History Museum of Neuchatel
LEPAA	LEPAA404-16	GBIFCH-BOL_LEPAA_0404		BOLD:AAA9312	CSCF-PAP-912728	654[0n]	2			Yes				07-Jul-2013	Brenthis ino				Natural History Museum of Neuchatel
LEPAA	LEPAA405-16	GBIFCH-BOL_LEPAA_0405		BOLD:AAA3082	CSCF-PAP-913004	654[0n]	2			No				07-Jul-2013	Melitaea diamina				Natural History Museum of Neuchatel
LEPAA	LEPAA406-16	GBIFCH-BOL_LEPAA_0406		BOLD:AAB4864	CSCF-PAP-913023	606[0n]	2			Yes				07-Jul-2013	Ochlodes sylvanus				Natural History Museum of Neuchatel
LEPAA	LEPAA407-16	GBIFCH-BOL_LEPAA_0407		BOLD:AAC8100	CSCF-PAP-913220	576[0n]	2			Yes				26-Jul-2013	Zygaena filipendulae				Natural History Museum of Neuchatel
LEPAA	LEPAA408-16	GBIFCH-BOL_LEPAA_0408		BOLD:AAA3081	CSCF-PAP-912992	654[0n]	2			No				01-Jul-2013	Melitaea athalia				Natural History Museum of Neuchatel
LEPAA	LEPAA409-16	GBIFCH-BOL_LEPAA_0409		BOLD:AAC8126	CSCF-PAP-913260	654[0n]	2			Yes				01-Jul-2013	Zygaena viciae				Natural History Museum of Neuchatel
LEPAA	LEPAA410-16	GBIFCH-BOL_LEPAA_0410		BOLD:ABX6141	CSCF-PAP-912931	654[0n]	2			Yes				23-Aug-2013	Hesperia comma				Natural History Museum of Neuchatel
LEPAA	LEPAA411-16	GBIFCH-BOL_LEPAA_0411		BOLD:AAB3455	CSCF-PAP-912799	654[0n]	2			Yes				23-Aug-2013	Erebia aethiops				Natural History Museum of Neuchatel
LEPAA	LEPAA412-16	GBIFCH-BOL_LEPAA_0412			CSCF-PAP-913108	0[n]				No				01-Jul-2013	Polyommatus icarus				Natural History Museum of Neuchatel
LEPAA	LEPAA413-16	GBIFCH-BOL_LEPAA_0413		BOLD:AAA6764	CSCF-PAP-913194	591[0n]	2			Yes				26-Jul-2013	Thymelicus sylvestris				Natural History Museum of Neuchatel
LEPAA	LEPAA414-16	GBIFCH-BOL_LEPAA_0414			CSCF-PAP-913192	0[n]				No				26-Jul-2013	Thymelicus sylvestris				Natural History Museum of Neuchatel
LEPAA	LEPAA415-16	GBIFCH-BOL_LEPAA_0415		BOLD:AAB1340	CSCF-PAP-912844	615[0n]	2			No				18-Jun-2013	Erebia medusa				Natural History Museum of Neuchatel
LEPAA	LEPAA416-16	GBIFCH-BOL_LEPAA_0416		BOLD:AAB4864	CSCF-PAP-913024	606[0n]	2			Yes				26-Jul-2013	Ochlodes sylvanus				Natural History Museum of Neuchatel
LEPAA	LEPAA417-16	GBIFCH-BOL_LEPAA_0417		BOLD:AAA8264	CSCF-PAP-912828	618[0n]	2			No				02-Aug-2013	Erebia ligea				Natural History Museum of Neuchatel
LEPAA	LEPAA418-16	GBIFCH-BOL_LEPAA_0418			CSCF-PAP-912912	0[n]				No				27-May-2013	Erynnis tages				Natural History Museum of Neuchatel
LEPAA	LEPAA419-16	GBIFCH-BOL_LEPAA_0419		BOLD:ABZ1727	CSCF-PAP-913070	654[0n]	2			Yes				06-Jul-2013	Plebejus argus				Natural History Museum of Neuchatel
LEPAA	LEPAA420-16	GBIFCH-BOL_LEPAA_0420		BOLD:AAD5110	CSCF-PAP-912664	654[0n]	2			Yes				06-Jul-2013	Adscita statices				Natural History Museum of Neuchatel
LEPAA	LEPAA421-16	GBIFCH-BOL_LEPAA_0421		BOLD:ABZ6967	CSCF-PAP-913126	615[0n]	2			No				26-Jul-2013	Pyrgus alveus				Natural History Museum of Neuchatel
LEPAA	LEPAA422-16	GBIFCH-BOL_LEPAA_0422		BOLD:AAB6141	CSCF-PAP-913153	654[0n]	2			Yes				05-Jun-2013	Pyrgus malvoides				Natural History Museum of Neuchatel
LEPAA	LEPAA423-16	GBIFCH-BOL_LEPAA_0423		BOLD:AAB7639	CSCF-PAP-913169	654[0n]	2			Yes				06-Jul-2013	Pyrgus serratulae				Natural History Museum of Neuchatel
LEPAA	LEPAA424-16	GBIFCH-BOL_LEPAA_0424		BOLD:AAA9312	CSCF-PAP-912726	654[0n]	2			Yes				11-Jul-2013	Brenthis daphne				Natural History Museum of Neuchatel
LEPAA	LEPAA425-16	GBIFCH-BOL_LEPAA_0425		BOLD:AAA6940	CSCF-PAP-912978	654[0n]	2			Yes				11-Jul-2013	Melanargia galathea				Natural History Museum of Neuchatel
LEPAA	LEPAA426-16	GBIFCH-BOL_LEPAA_0426		BOLD:AAB9884	CSCF-PAP-913013	654[0n]	2			Yes				11-Aug-2013	Minois dryas				Natural History Museum of Neuchatel
LEPAA	LEPAA427-16	GBIFCH-BOL_LEPAA_0427		BOLD:AAB8365	CSCF-PAP-913181	602[0n]	2			Yes				06-Aug-2013	Thymelicus acteon				Natural History Museum of Neuchatel
LEPAA	LEPAA428-16	GBIFCH-BOL_LEPAA_0428			CSCF-PAP-913119	483[0n]	2			No				06-Aug-2013	Polyommatus thersites				Natural History Museum of Neuchatel
LEPAA	LEPAA429-16	GBIFCH-BOL_LEPAA_0429		BOLD:AAB0552	CSCF-PAP-913040	603[0n]	2			Yes				06-Jun-2013	Pieris brassicae				Natural History Museum of Neuchatel
LEPAA	LEPAA430-16	GBIFCH-BOL_LEPAA_0430			CSCF-PAP-912777	0[n]				No				11-Aug-2013	Colias alfacariensis				Natural History Museum of Neuchatel
LEPAA	LEPAA431-16	GBIFCH-BOL_LEPAA_0431		BOLD:AAD7506	CSCF-PAP-913228	654[0n]	2			Yes				06-Aug-2013	Zygaena loti				Natural History Museum of Neuchatel
LEPAA	LEPAA432-16	GBIFCH-BOL_LEPAA_0432		BOLD:AAD7508	CSCF-PAP-913224	570[0n]	2			Yes				11-Jul-2013	Zygaena lonicerae				Natural History Museum of Neuchatel
LEPAA	LEPAA433-16	GBIFCH-BOL_LEPAA_0433		BOLD:AAB8019	CSCF-PAP-913015	654[0n]	2			Yes				11-Aug-2013	Favonius quercus				Natural History Museum of Neuchatel
LEPAA	LEPAA434-16	GBIFCH-BOL_LEPAA_0434		BOLD:AAA2226	CSCF-PAP-913047	567[0n]	2			Yes				07-Jul-2013	Pieris bryoniae				Natural History Museum of Neuchatel
LEPAA	LEPAA435-16	GBIFCH-BOL_LEPAA_0435		BOLD:AAB1133	CSCF-PAP-912672	654[0n]	2			Yes				23-Jul-2013	Anthocharis cardamines				Natural History Museum of Neuchatel
LEPAA	LEPAA436-16	GBIFCH-BOL_LEPAA_0436		BOLD:AAA3081	CSCF-PAP-912998	654[0n]	2			Yes				26-Jul-2013	Melitaea athalia				Natural History Museum of Neuchatel
LEPAA	LEPAA437-16	GBIFCH-BOL_LEPAA_0437		BOLD:AAB3783	CSCF-PAP-913050	654[0n]	2			Yes				06-Jun-2013	Pieris mannii				Natural History Museum of Neuchatel
LEPAA	LEPAA438-16	GBIFCH-BOL_LEPAA_0438		BOLD:AAB4864	CSCF-PAP-913022	654[0n]	2			Yes				11-Jul-2013	Ochlodes sylvanus				Natural History Museum of Neuchatel
LEPAA	LEPAA439-16	GBIFCH-BOL_LEPAA_0439		BOLD:AAA8853	CSCF-PAP-912943	654[0n]	2			Yes				11-Jul-2013	Lasiommata maera				Natural History Museum of Neuchatel
LEPAA	LEPAA440-16	GBIFCH-BOL_LEPAA_0440		BOLD:AAC5377	CSCF-PAP-912856	654[0n]	2			Yes				11-Jul-2013	Erebia melampus				Natural History Museum of Neuchatel
LEPAA	LEPAA441-16	GBIFCH-BOL_LEPAA_0441		BOLD:AAB3455	CSCF-PAP-912797	654[0n]	2			Yes				01-Aug-2013	Erebia aethiops				Natural History Museum of Neuchatel
LEPAA	LEPAA442-16	GBIFCH-BOL_LEPAA_0442		BOLD:ABZ1727	CSCF-PAP-913072	654[0n]	2			Yes				17-Jul-2013	Plebejus argus				Natural History Museum of Neuchatel
LEPAA	LEPAA443-16	GBIFCH-BOL_LEPAA_0443		BOLD:AAC5456	CSCF-PAP-912862	654[0n]	2			Yes				11-Jul-2013	Erebia meolans				Natural History Museum of Neuchatel
LEPAA	LEPAA444-16	GBIFCH-BOL_LEPAA_0444		BOLD:AAB0969	CSCF-PAP-912804	654[0n]	2			Yes				22-Jul-2013	Erebia epiphron				Natural History Museum of Neuchatel
LEPAA	LEPAA445-16	GBIFCH-BOL_LEPAA_0445		BOLD:AAB1940	CSCF-PAP-1012371	654[0n]	2			Yes				11-Jul-2013	Aphantopus hyperantus				Natural History Museum of Neuchatel
LEPAA	LEPAA446-16	GBIFCH-BOL_LEPAA_0446		BOLD:AAB1747	CSCF-PAP-912705	654[0n]	2			Yes				01-Jul-2013	Boloria euphrosyne				Natural History Museum of Neuchatel
LEPAA	LEPAA447-16	GBIFCH-BOL_LEPAA_0447		BOLD:AAA8265	CSCF-PAP-912891	654[0n]	2			Yes				01-Aug-2013	Erebia pronoe vergy				Natural History Museum of Neuchatel
LEPAA	LEPAA448-16	GBIFCH-BOL_LEPAA_0448		BOLD:ACE9283	CSCF-PAP-913129	654[0n]	2			Yes				07-Jul-2013	Pyrgus andromedae				Natural History Museum of Neuchatel
LEPAA	LEPAA449-16	GBIFCH-BOL_LEPAA_0449		BOLD:AAE2578	CSCF-PAP-913010	654[0n]	2			Yes				15-Aug-2013	Melitaea varia				Natural History Museum of Neuchatel
LEPAA	LEPAA450-16	GBIFCH-BOL_LEPAA_0450		BOLD:AAA7508	CSCF-PAP-912916	654[0n]	2			Yes				22-Jul-2013	Euphydryas aurinia glaciegenita				Natural History Museum of Neuchatel
LEPAA	LEPAA451-16	GBIFCH-BOL_LEPAA_0451		BOLD:ABY9182	CSCF-PAP-912685	654[0n]	2			Yes				15-Aug-2013	Fabriciana niobe				Natural History Museum of Neuchatel
LEPAA	LEPAA452-16	GBIFCH-BOL_LEPAA_0452		BOLD:AAB3783	CSCF-PAP-913053	654[0n]	2			Yes				05-Jul-2013	Pieris mannii				Natural History Museum of Neuchatel
LEPAA	LEPAA453-16	GBIFCH-BOL_LEPAA_0453		BOLD:AAD7474	CSCF-PAP-913205	654[0n]	2			Yes				22-Jul-2013	Zygaena exulans				Natural History Museum of Neuchatel
LEPAA	LEPAA454-16	GBIFCH-BOL_LEPAA_0454			CSCF-PAP-912693	0[n]				No				20-Jul-2013	Aricia artaxerxes				Natural History Museum of Neuchatel
LEPAA	LEPAA455-16	GBIFCH-BOL_LEPAA_0455		BOLD:AAA3628	CSCF-PAP-913081	606[0n]	2			No				30-Jun-2013	Plebejus idas				Natural History Museum of Neuchatel
LEPAA	LEPAA456-16	GBIFCH-BOL_LEPAA_0456		BOLD:AAB4864	CSCF-PAP-913027	612[0n]	2			Yes				20-Jul-2013	Ochlodes sylvanus				Natural History Museum of Neuchatel
LEPAA	LEPAA457-16	GBIFCH-BOL_LEPAA_0457		BOLD:AAA6760	CSCF-PAP-913186	654[0n]	2			Yes				05-Jul-2013	Thymelicus lineola				Natural History Museum of Neuchatel
LEPAA	LEPAA458-16	GBIFCH-BOL_LEPAA_0458		BOLD:ABX6141	CSCF-PAP-912925	654[0n]	2			No				15-Aug-2013	Hesperia comma				Natural History Museum of Neuchatel
LEPAA	LEPAA459-16	GBIFCH-BOL_LEPAA_0459		BOLD:ACE5088	CSCF-PAP-913131	654[0n]	2			Yes				14-May-2013	Pyrgus armoricanus				Natural History Museum of Neuchatel
LEPAA	LEPAA460-16	GBIFCH-BOL_LEPAA_0460		BOLD:ACE9283	CSCF-PAP-913134	654[0n]	2			Yes				01-Jul-2013	Pyrgus cacaliae				Natural History Museum of Neuchatel
LEPAA	LEPAA461-16	GBIFCH-BOL_LEPAA_0461		BOLD:AAC8100	CSCF-PAP-913213	618[0n]	2			Yes				18-Aug-2013	Zygaena filipendulae				Natural History Museum of Neuchatel
LEPAA	LEPAA462-16	GBIFCH-BOL_LEPAA_0462		BOLD:AAE6704	CSCF-PAP-913232	654[0n]	2			Yes				19-Jul-2013	Zygaena purpuralis				Natural History Museum of Neuchatel
LEPAA	LEPAA463-16	GBIFCH-BOL_LEPAA_0463			CSCF-PAP-913074	0[n]				No				13-Jul-2013	Plebejus argus				Natural History Museum of Neuchatel
LEPAA	LEPAA464-16	GBIFCH-BOL_LEPAA_0464		BOLD:AAB1429	CSCF-PAP-912968	606[0n]	2			No				06-Jul-2013	Phengaris arion				Natural History Museum of Neuchatel
LEPAA	LEPAA465-16	GBIFCH-BOL_LEPAA_0465			CSCF-PAP-913038	474[0n]	2			No				13-Jul-2013	Parnassius sacerdos				Natural History Museum of Neuchatel
LEPAA	LEPAA466-16	GBIFCH-BOL_LEPAA_0466		BOLD:AAA5810	CSCF-PAP-913030	654[0n]	2			Yes				08-Jun-2013	Papilio machaon				Natural History Museum of Neuchatel
LEPAA	LEPAA467-16	GBIFCH-BOL_LEPAA_0467		BOLD:AAA8638	CSCF-PAP-913196	528[0n]	2			No				10-Aug-2013	Vanessa atalanta				Natural History Museum of Neuchatel
LEPAA	LEPAA468-16	GBIFCH-BOL_LEPAA_0468		BOLD:AAA5337	CSCF-PAP-913199	582[0n]	2			No				15-Aug-2013	Vanessa cardui				Natural History Museum of Neuchatel
LEPAA	LEPAA469-16	GBIFCH-BOL_LEPAA_0469		BOLD:AAA9652	CSCF-PAP-912669	600[0n]	2			Yes				05-Jun-2013	Aglais urticae				Natural History Museum of Neuchatel
LEPAA	LEPAA470-16	GBIFCH-BOL_LEPAA_0470		BOLD:AAA8773	CSCF-PAP-912675	612[0n]	2			Yes				13-Jul-2013	Aporia crataegi				Natural History Museum of Neuchatel
LEPAA	LEPAA471-16	GBIFCH-BOL_LEPAA_0471		BOLD:AAA2224	CSCF-PAP-913063	654[0n]	2			Yes				26-Jul-2013	Pieris rapae				Natural History Museum of Neuchatel
LEPAA	LEPAA472-16	GBIFCH-BOL_LEPAA_0472		BOLD:AAA2226	CSCF-PAP-913044	552[0n]	2			No				06-Jul-2013	Pieris bryoniae				Natural History Museum of Neuchatel
LEPAA	LEPAA473-16	GBIFCH-BOL_LEPAA_0473		BOLD:AAC9448	CSCF-PAP-913120	588[0n]	2			Yes				25-Jul-2013	Pontia callidice				Natural History Museum of Neuchatel
LEPAA	LEPAA474-16	GBIFCH-BOL_LEPAA_0474		BOLD:ABZ3039	CSCF-PAP-912774	654[0n]	2			Yes				22-Aug-2013	Colias croceus				Natural History Museum of Neuchatel
LEPAA	LEPAA475-16	GBIFCH-BOL_LEPAA_0475		BOLD:ACF0844	CSCF-PAP-912781	513[0n]	2			No				13-Jul-2013	Colias phicomone				Natural History Museum of Neuchatel
LEPAA	LEPAA476-16	GBIFCH-BOL_LEPAA_0476			CSCF-PAP-912778	0[n]				No				06-Jul-2013	Colias sp.				Natural History Museum of Neuchatel
LEPAA	LEPAA477-16	GBIFCH-BOL_LEPAA_0477		BOLD:AAA9222	CSCF-PAP-912923	654[0n]	2			Yes				22-Aug-2013	Gonepteryx rhamni				Natural History Museum of Neuchatel
LEPAA	LEPAA478-16	GBIFCH-BOL_LEPAA_0478		BOLD:AAB2344	CSCF-PAP-912677	639[0n]	2			Yes				22-Aug-2013	Fabriciana adippe				Natural History Museum of Neuchatel
LEPAA	LEPAA479-16	GBIFCH-BOL_LEPAA_0479		BOLD:AAB2322	CSCF-PAP-912683	594[0n]	2			Yes				26-Jul-2013	Speyeria agalaja				Natural History Museum of Neuchatel
LEPAA	LEPAA480-16	GBIFCH-BOL_LEPAA_0480		BOLD:AAA8713	CSCF-PAP-912939	561[0n]	2			Yes				26-Jul-2013	Issoria lathonia				Natural History Museum of Neuchatel
LEPAA	LEPAA481-16	GBIFCH-BOL_LEPAA_0481		BOLD:ACS2433	CSCF-PAP-912724	606[0n]	2			Yes				26-Jul-2013	Boloria titania				Natural History Museum of Neuchatel
LEPAA	LEPAA482-16	GBIFCH-BOL_LEPAA_0482		BOLD:ACE7514	CSCF-PAP-912719	621[0n]	2			Yes				22-Aug-2013	Boloria pales				Natural History Museum of Neuchatel
LEPAA	LEPAA483-16	GBIFCH-BOL_LEPAA_0483		BOLD:AAA9406	CSCF-PAP-912717	654[0n]	2			Yes				06-Jul-2013	Boloria napaea				Natural History Museum of Neuchatel
LEPAA	LEPAA484-16	GBIFCH-BOL_LEPAA_0484			CSCF-PAP-912722	0[n]				No				13-Jul-2013	Boloria selene				Natural History Museum of Neuchatel
LEPAA	LEPAA485-16	GBIFCH-BOL_LEPAA_0485		BOLD:AAB5849	CSCF-PAP-912699	636[0n]	2			Yes				08-Jun-2013	Boloria dia				Natural History Museum of Neuchatel
LEPAA	LEPAA486-16	GBIFCH-BOL_LEPAA_0486		BOLD:AAJ0031	CSCF-PAP-912920	654[0n]	2			Yes				03-Aug-2013	Euphydryas cynthia				Natural History Museum of Neuchatel
LEPAA	LEPAA487-16	GBIFCH-BOL_LEPAA_0487		BOLD:AAA3082	CSCF-PAP-913005	618[0n]	2			Yes				26-Jul-2013	Melitaea diamina				Natural History Museum of Neuchatel
LEPAA	LEPAA488-16	GBIFCH-BOL_LEPAA_0488		BOLD:AAA7370	CSCF-PAP-913007	618[0n]	2			Yes				26-Jul-2013	Melitaea phoebe				Natural History Museum of Neuchatel
LEPAA	LEPAA489-16	GBIFCH-BOL_LEPAA_0489		BOLD:AAA6940	CSCF-PAP-912977	612[0n]	2			Yes				22-Aug-2013	Melanargia galathea				Natural History Museum of Neuchatel
LEPAA	LEPAA490-16	GBIFCH-BOL_LEPAA_0490		BOLD:AAC3112	CSCF-PAP-912949	618[0n]	2			Yes				05-Jun-2013	Lasiommata petropolitana				Natural History Museum of Neuchatel
LEPAA	LEPAA491-16	GBIFCH-BOL_LEPAA_0491		BOLD:AAA8853	CSCF-PAP-935369	606[0n]	2			Yes				26-Jul-2013	Lasiommata maera				Natural History Museum of Neuchatel
LEPAA	LEPAA492-16	GBIFCH-BOL_LEPAA_0492		BOLD:AAB0123	CSCF-PAP-912945	618[0n]	2			No				13-Jul-2013	Lasiommata megera				Natural History Museum of Neuchatel
LEPAA	LEPAA493-16	GBIFCH-BOL_LEPAA_0493		BOLD:AAB1340	CSCF-PAP-912841	654[0n]	2			Yes				06-Jul-2013	Erebia medusa				Natural History Museum of Neuchatel
LEPAA	LEPAA494-16	GBIFCH-BOL_LEPAA_0494			CSCF-PAP-912888	0[n]				No				02-Aug-2013	Erebia pluto				Natural History Museum of Neuchatel
LEPAA	LEPAA495-16	GBIFCH-BOL_LEPAA_0495		BOLD:AAA8264	CSCF-PAP-912818	606[0n]	2			Yes				13-Jul-2013	Erebia euryale				Natural History Museum of Neuchatel
LEPAA	LEPAA496-16	GBIFCH-BOL_LEPAA_0496		BOLD:AAB3454	CSCF-PAP-912878	633[0n]	2			No				02-Aug-2013	Erebia pandrose				Natural History Museum of Neuchatel
LEPAA	LEPAA497-16	GBIFCH-BOL_LEPAA_0497		BOLD:AAA8264	CSCF-PAP-912830	630[0n]	2			Yes				15-Aug-2013	Erebia ligea				Natural History Museum of Neuchatel
LEPAA	LEPAA498-16	GBIFCH-BOL_LEPAA_0498		BOLD:AAB3455	CSCF-PAP-912795	618[0n]	2			Yes				15-Aug-2013	Erebia aethiops				Natural History Museum of Neuchatel
LEPAA	LEPAA499-16	GBIFCH-BOL_LEPAA_0499		BOLD:AAC0261	CSCF-PAP-912826	636[0n]	2			Yes				02-Aug-2013	Erebia gorge				Natural History Museum of Neuchatel
LEPAA	LEPAA500-16	GBIFCH-BOL_LEPAA_0500		BOLD:AAC5456	CSCF-PAP-912861	654[0n]	2			Yes				06-Jul-2013	Erebia meolans				Natural History Museum of Neuchatel
LEPAA	LEPAA501-16	GBIFCH-BOL_LEPAA_0501		BOLD:ACF7581	CSCF-PAP-912866	654[0n]	2			Yes				15-Aug-2013	Erebia montana				Natural History Museum of Neuchatel
LEPAA	LEPAA502-16	GBIFCH-BOL_LEPAA_0502			CSCF-PAP-912836	0[n]				No				26-Jul-2013	Erebia manto				Natural History Museum of Neuchatel
LEPAA	LEPAA503-16	GBIFCH-BOL_LEPAA_0503		BOLD:AAB1341	CSCF-PAP-912872	654[0n]	2			Yes				06-Jul-2013	Erebia oeme				Natural History Museum of Neuchatel
LEPAA	LEPAA504-16	GBIFCH-BOL_LEPAA_0504		BOLD:AAJ1029	CSCF-PAP-912885	654[0n]	2			Yes				26-Jul-2013	Erebia pharte				Natural History Museum of Neuchatel
LEPAA	LEPAA505-16	GBIFCH-BOL_LEPAA_0505		BOLD:AAB3453	CSCF-PAP-912905	579[0n]	2			Yes				06-Jul-2013	Erebia tyndarus				Natural History Museum of Neuchatel
LEPAA	LEPAA506-16	GBIFCH-BOL_LEPAA_0506		BOLD:AAC5377	CSCF-PAP-912851	600[0n]	2			No				13-Jul-2013	Erebia melampus				Natural History Museum of Neuchatel
LEPAA	LEPAA507-16	GBIFCH-BOL_LEPAA_0507			CSCF-PAP-912739	0[n]				No				06-Jul-2013	Coenonympha gardetta				Natural History Museum of Neuchatel
LEPAA	LEPAA508-16	GBIFCH-BOL_LEPAA_0508		BOLD:AAB8947	CSCF-PAP-912955	606[0n]	2			Yes				26-Jul-2013	Lycaena hippothoe eurydame				Natural History Museum of Neuchatel
LEPAA	LEPAA509-16	GBIFCH-BOL_LEPAA_0509		BOLD:AAB0049	CSCF-PAP-912730	654[0n]	2			Yes				05-Jun-2013	Callophrys rubi				Natural History Museum of Neuchatel
LEPAA	LEPAA510-16	GBIFCH-BOL_LEPAA_0510			CSCF-PAP-913100	297[0n]	2			No				26-Jul-2013	Polyommatus dorylas				Natural History Museum of Neuchatel
LEPAA	LEPAA511-16	GBIFCH-BOL_LEPAA_0511		BOLD:AAB3027	CSCF-PAP-913112	654[0n]	2			Yes				06-Jul-2013	Cyaniris semiargus				Natural History Museum of Neuchatel
LEPAA	LEPAA512-16	GBIFCH-BOL_LEPAA_0512		BOLD:AAB4303	CSCF-PAP-912971	639[0n]	2			Yes				13-Jul-2013	Phengaris alcon				Natural History Museum of Neuchatel
LEPAA	LEPAA513-16	GBIFCH-BOL_LEPAA_0513		BOLD:AAB1728	CSCF-PAP-912961	654[0n]	2			Yes				06-Jul-2013	Lycaena tityrus subalpina				Natural History Museum of Neuchatel
LEPAA	LEPAA514-16	GBIFCH-BOL_LEPAA_0514		BOLD:AAA3305	CSCF-PAP-913096	654[0n]	2			Yes				13-Jul-2013	Lysandra coridon				Natural History Museum of Neuchatel
LEPAA	LEPAA515-16	GBIFCH-BOL_LEPAA_0515			CSCF-PAP-912967	0[n]				No				26-Jul-2013	Lycaena virgaureae				Natural History Museum of Neuchatel
LEPAA	LEPAA516-16	GBIFCH-BOL_LEPAA_0516			CSCF-PAP-913092	0[n]				No				06-Jul-2013	Lysandra bellargus				Natural History Museum of Neuchatel
LEPAA	LEPAA517-16	GBIFCH-BOL_LEPAA_0517		BOLD:AAA3303	CSCF-PAP-936240	654[0n]	2			Yes				06-Jul-2013	Polyommatus icarus				Natural History Museum of Neuchatel
LEPAA	LEPAA518-16	GBIFCH-BOL_LEPAA_0518		BOLD:AAC3364	CSCF-PAP-913076	654[0n]	2			Yes				13-Jul-2013	Eumedonia eumedon				Natural History Museum of Neuchatel
LEPAA	LEPAA519-16	GBIFCH-BOL_LEPAA_0519		BOLD:AAE5039	CSCF-PAP-913089	630[0n]	2			Yes				06-Jul-2013	Agriades orbitulus				Natural History Museum of Neuchatel
LEPAA	LEPAA520-16	GBIFCH-BOL_LEPAA_0520		BOLD:AAA3303	CSCF-PAP-913103	654[0n]	2			Yes				06-Jul-2013	Polyommatus eros				Natural History Museum of Neuchatel
LEPAA	LEPAA521-16	GBIFCH-BOL_LEPAA_0521		BOLD:AAA9082	CSCF-PAP-912786	654[0n]	2			Yes				05-Jun-2013	Cupido minimus				Natural History Museum of Neuchatel
LEPAA	LEPAA522-16	GBIFCH-BOL_LEPAA_0522		BOLD:AAA6267	CSCF-PAP-912732	624[0n]	2			Yes				06-Jul-2013	Carterocephalus palaemon				Natural History Museum of Neuchatel
LEPAA	LEPAA523-16	GBIFCH-BOL_LEPAA_0523			CSCF-PAP-912915	0[n]				No				08-Jun-2013	Erynnis tages				Natural History Museum of Neuchatel
LEPAA	LEPAA524-16	GBIFCH-BOL_LEPAA_0524		BOLD:ABX6141	CSCF-PAP-912924	606[0n]	2			Yes				16-Aug-2013	Hesperia comma				Natural History Museum of Neuchatel
LEPAA	LEPAA525-16	GBIFCH-BOL_LEPAA_0525		BOLD:AAC8100	CSCF-PAP-913214	612[0n]	2			Yes				15-Aug-2013	Zygaena filipendulae				Natural History Museum of Neuchatel
LEPAA	LEPAA526-16	GBIFCH-BOL_LEPAA_0526		BOLD:AAD7506	CSCF-PAP-913227	606[0n]	2			Yes				26-Jul-2013	Zygaena loti				Natural History Museum of Neuchatel
LEPAA	LEPAA527-16	GBIFCH-BOL_LEPAA_0527		BOLD:ABZ5868	CSCF-PAP-912723	603[0n]	2			Yes				14-Jul-2013	Boloria thore				Natural History Museum of Neuchatel
LEPAA	LEPAA528-16	GBIFCH-BOL_LEPAA_0528		BOLD:AAE2578	CSCF-PAP-913009	612[0n]	2			Yes				16-Jul-2013	Melitaea varia				Natural History Museum of Neuchatel
LEPAA	LEPAA529-16	GBIFCH-BOL_LEPAA_0529			CSCF-PAP-912758	0[n]				No				16-Jul-2013	Coenonympha gardetta				Natural History Museum of Neuchatel
LEPAA	LEPAA530-16	GBIFCH-BOL_LEPAA_0530		BOLD:ABZ1727	CSCF-PAP-913071	654[0n]	2			Yes				04-Aug-2013	Plebejus argus				Natural History Museum of Neuchatel
LEPAA	LEPAA531-16	GBIFCH-BOL_LEPAA_0531		BOLD:ACE9283	CSCF-PAP-913137	579[0n]	2			Yes				14-Jul-2013	Pyrgus cacaliae				Natural History Museum of Neuchatel
LEPAA	LEPAA532-16	GBIFCH-BOL_LEPAA_0532		BOLD:AAB4984	CSCF-PAP-912966	654[0n]	2			Yes				16-Aug-2013	Lycaena virgaureae				Natural History Museum of Neuchatel
LEPAA	LEPAA533-16	GBIFCH-BOL_LEPAA_0533		BOLD:AAB6141	CSCF-PAP-913151	654[0n]	2			Yes				13-Jun-2013	Pyrgus malvoides				Natural History Museum of Neuchatel
LEPAA	LEPAA534-16	GBIFCH-BOL_LEPAA_0534		BOLD:AAD7508	CSCF-PAP-913221	654[0n]	2			Yes				14-Jul-2013	Zygaena lonicerae				Natural History Museum of Neuchatel
LEPAA	LEPAA535-16	GBIFCH-BOL_LEPAA_0535		BOLD:ABZ4715	CSCF-PAP-912770	603[0n]	2			Yes				04-Jul-2013	Colias alfacariensis				Natural History Museum of Neuchatel
LEPAA	LEPAA536-16	GBIFCH-BOL_LEPAA_0536		BOLD:AAA5321	CSCF-PAP-913077	528[0n]	2			No				22-Jul-2013	Agriades glandon				Natural History Museum of Neuchatel
LEPAA	LEPAA537-16	GBIFCH-BOL_LEPAA_0537		BOLD:AAB5172	CSCF-PAP-913086	591[0n]	2			No				02-Aug-2013	Agriades optilete				Natural History Museum of Neuchatel
LEPAA	LEPAA538-16	GBIFCH-BOL_LEPAA_0538		BOLD:AAB6141	CSCF-PAP-913148	654[0n]	2			Yes				13-Jun-2013	Pyrgus malvoides				Natural History Museum of Neuchatel
LEPAA	LEPAA539-16	GBIFCH-BOL_LEPAA_0539		BOLD:ABY9182	CSCF-PAP-912684	624[0n]	2			Yes				16-Aug-2013	Fabriciana niobe				Natural History Museum of Neuchatel
LEPAA	LEPAA540-16	GBIFCH-BOL_LEPAA_0540		BOLD:AAA7584	CSCF-PAP-912985	654[0n]	2			Yes				20-Jul-2013	Melitaea nevadensis				Natural History Museum of Neuchatel
LEPAA	LEPAA541-16	GBIFCH-BOL_LEPAA_0541		BOLD:AAA3082	CSCF-PAP-913002	654[0n]	2			Yes				22-Jul-2013	Melitaea diamina				Natural History Museum of Neuchatel
LEPAA	LEPAA542-16	GBIFCH-BOL_LEPAA_0542		BOLD:AAC1025	CSCF-PAP-913006	594[0n]	2			Yes				29-Aug-2013	Melitaea parthenoides				Natural History Museum of Neuchatel
LEPAA	LEPAA543-16	GBIFCH-BOL_LEPAA_0543		BOLD:AAB8947	CSCF-PAP-912956	585[0n]	2			Yes				26-Jul-2013	Lycaena hippothoe eurydice				Natural History Museum of Neuchatel
LEPAA	LEPAA544-16	GBIFCH-BOL_LEPAA_0544		BOLD:AAA6759	CSCF-PAP-913185	582[0n]	2			Yes				22-Jul-2013	Thymelicus lineola				Natural History Museum of Neuchatel
LEPAA	LEPAA545-16	GBIFCH-BOL_LEPAA_0545			CSCF-PAP-913184	0[n]				No				03-Aug-2013	Thymelicus lineola				Natural History Museum of Neuchatel
LEPAA	LEPAA546-16	GBIFCH-BOL_LEPAA_0546			CSCF-PAP-912908	0[n]				No				20-Jul-2013	Erynnis tages				Natural History Museum of Neuchatel
LEPAA	LEPAA547-16	GBIFCH-BOL_LEPAA_0547		BOLD:AAC4588	CSCF-PAP-913177	654[0n]	2			Yes				17-Aug-2013	Spialia sertorius				Natural History Museum of Neuchatel
LEPAA	LEPAA548-16	GBIFCH-BOL_LEPAA_0548			CSCF-PAP-913200	0[n]				No				20-Jul-2013	Zygaena ephialtes				Natural History Museum of Neuchatel
LEPAA	LEPAA549-16	GBIFCH-BOL_LEPAA_0549		BOLD:AAC8100	CSCF-PAP-913219	654[0n]	2			Yes				16-Aug-2013	Zygaena filipendulae				Natural History Museum of Neuchatel
LEPAA	LEPAA550-16	GBIFCH-BOL_LEPAA_0550		BOLD:AAC8100	CSCF-PAP-913212	570[0n]	2			Yes				03-Aug-2013	Zygaena filipendulae				Natural History Museum of Neuchatel
LEPAA	LEPAA551-16	GBIFCH-BOL_LEPAA_0551		BOLD:AAA9406	CSCF-PAP-912711	612[0n]	2			No				01-Aug-2013	Boloria napaea				Natural History Museum of Neuchatel
LEPAA	LEPAA552-16	GBIFCH-BOL_LEPAA_0552		BOLD:AAF0097	CSCF-PAP-912886	600[0n]	2			Yes				02-Aug-2013	Erebia pluto				Natural History Museum of Neuchatel
LEPAA	LEPAA553-16	GBIFCH-BOL_LEPAA_0553	122717	BOLD:AAC3112	CSCF-PAP-978258	654[0n]	2			Yes				24-May-2014	Lasiommata petropolitana				Natural History Museum of Neuchatel
LEPAA	LEPAA554-16	GBIFCH-BOL_LEPAA_0554		BOLD:AAB3453	CSCF-PAP-756057	654[0n]	2			Yes				10-Aug-2010	Erebia tyndarus				Natural History Museum of Neuchatel
LEPAA	LEPAA555-16	GBIFCH-BOL_LEPAA_0555		BOLD:AAB1940	CSCF-PAP-912674	636[0n]	2			Yes				04-Jul-2013	Aphantopus hyperantus				Natural History Museum of Neuchatel
LEPAA	LEPAA556-16	GBIFCH-BOL_LEPAA_0556		BOLD:AAA5531	CSCF-PAP-912776	615[0n]	2			Yes				15-Jul-2013	Colias hyale				Natural History Museum of Neuchatel
LEPAA	LEPAA557-16	GBIFCH-BOL_LEPAA_0557		BOLD:AAB5250	CSCF-PAP-912952	609[0n]	2			Yes				17-Jul-2013	Libythea celtis				Natural History Museum of Neuchatel
LEPAA	LEPAA558-16	GBIFCH-BOL_LEPAA_0558			CSCF-PAP-912950	0[n]				No				04-Jun-2013	Leptidea juvernica				Natural History Museum of Neuchatel
LEPAA	LEPAA559-16	GBIFCH-BOL_LEPAA_0559		BOLD:AAB5999	CSCF-PAP-913179	579[0n]	2			Yes				01-Sep-2013	Thecla betulae				Natural History Museum of Neuchatel
LEPAA	LEPAA560-16	GBIFCH-BOL_LEPAA_0560		BOLD:AAA3305	CSCF-PAP-913095	654[0n]	2			Yes				11-Aug-2013	Lysandra coridon				Natural History Museum of Neuchatel
LEPAA	LEPAA561-16	GBIFCH-BOL_LEPAA_0561		BOLD:AAB1429	CSCF-PAP-912969	645[0n]	2			Yes				15-Jul-2013	Phengaris arion				Natural History Museum of Neuchatel
LEPAA	LEPAA562-16	GBIFCH-BOL_LEPAA_0562		BOLD:AAC8126	CSCF-PAP-913259	615[0n]	2			Yes				16-Jul-2013	Zygaena viciae				Natural History Museum of Neuchatel
LEPAA	LEPAA563-16	GBIFCH-BOL_LEPAA_0563		BOLD:AAA5424	CSCF-PAP-912921	576[0n]	2			No				04-Jun-2013	Glaucopsyche alexis				Natural History Museum of Neuchatel
LEPAA	LEPAA564-16	GBIFCH-BOL_LEPAA_0564		BOLD:AAB4984	CSCF-PAP-912965	654[0n]	2			Yes				04-Jul-2013	Lycaena virgaureae				Natural History Museum of Neuchatel
LEPAA	LEPAA565-16	GBIFCH-BOL_LEPAA_0565			CSCF-PAP-905828	0[n]				No				04-Aug-2013	Pyrgus armoricanus				Natural History Museum of Neuchatel
LEPAA	LEPAA566-16	GBIFCH-BOL_LEPAA_0566			CSCF-PAP-909101	495[0n]	2			No				09-Aug-2013	Phengaris teleius				Natural History Museum of Neuchatel
LEPAA	LEPAA567-16	GBIFCH-BOL_LEPAA_0567		BOLD:AAB6141	CSCF-PAP-905833	603[0n]	2			Yes				05-Jun-2013	Pyrgus malvae				Natural History Museum of Neuchatel
LEPAA	LEPAA568-16	GBIFCH-BOL_LEPAA_0568		BOLD:ACE5088	CSCF-PAP-905824	579[0n]	2			Yes				04-Aug-2013	Pyrgus armoricanus				Natural History Museum of Neuchatel
LEPAA	LEPAA569-16	GBIFCH-BOL_LEPAA_0569		BOLD:AAB6628	CSCF-PAP-905837	621[0n]	2			Yes				06-Jul-2013	Satyrium ilicis				Natural History Museum of Neuchatel
LEPAA	LEPAA570-16	GBIFCH-BOL_LEPAA_0570		BOLD:AAB4662	CSCF-PAP-905836	615[0n]	2			Yes				04-Jul-2013	Satyrium acaciae				Natural History Museum of Neuchatel
LEPAA	LEPAA571-16	GBIFCH-BOL_LEPAA_0571		BOLD:ABZ1727	CSCF-PAP-905815	630[0n]	2			Yes				02-Aug-2013	Plebejus argus				Natural History Museum of Neuchatel
LEPAA	LEPAA572-16	GBIFCH-BOL_LEPAA_0572		BOLD:AAA2226	CSCF-PAP-905812	654[0n]	2			Yes				07-Jun-2013	Pieris napi				Natural History Museum of Neuchatel
LEPAA	LEPAA573-16	GBIFCH-BOL_LEPAA_0573		BOLD:AAC1025	CSCF-PAP-905805	654[0n]	2			Yes				25-Jul-2013	Melitaea parthenoides				Natural History Museum of Neuchatel
LEPAA	LEPAA574-16	GBIFCH-BOL_LEPAA_0574			CSCF-PAP-905821	0[n]				No				04-Aug-2013	Plebejus argus				Natural History Museum of Neuchatel
LEPAA	LEPAA575-16	GBIFCH-BOL_LEPAA_0575		BOLD:AAB8365	CSCF-PAP-905838	580[0n]	2			Yes				04-Aug-2013	Thymelicus acteon				Natural History Museum of Neuchatel
LEPAA	LEPAA576-16	GBIFCH-BOL_LEPAA_0576		BOLD:AAA9082	CSCF-PAP-905795	654[0n]	2			Yes				04-Aug-2013	Cupido minimus				Natural History Museum of Neuchatel
LEPAA	LEPAA577-16	GBIFCH-BOL_LEPAA_0577		BOLD:AAA5531	CSCF-PAP-905794	654[0n]	2			Yes				04-Aug-2013	Colias hyale				Natural History Museum of Neuchatel
LEPAA	LEPAA578-16	GBIFCH-BOL_LEPAA_0578		BOLD:ABZ3039	CSCF-PAP-905793	654[0n]	2			Yes				19-Jun-2013	Colias croceus				Natural History Museum of Neuchatel
LEPAA	LEPAA579-16	GBIFCH-BOL_LEPAA_0579		BOLD:AAA9402	CSCF-PAP-905791	654[0n]	2			Yes				05-Aug-2013	Coenonympha glycerion				Natural History Museum of Neuchatel
LEPAA	LEPAA580-16	GBIFCH-BOL_LEPAA_0580		BOLD:ACE7893	CSCF-PAP-905785	618[0n]	2			Yes				21-Aug-2013	Aricia artaxerxes				Natural History Museum of Neuchatel
LEPAA	LEPAA581-16	GBIFCH-BOL_LEPAA_0581		BOLD:AAA4731	CSCF-PAP-905786	654[0n]	2			Yes				05-Aug-2013	Aricia agestis				Natural History Museum of Neuchatel
LEPAA	LEPAA582-16	GBIFCH-BOL_LEPAA_0582		BOLD:ACE7893	CSCF-PAP-905787	654[0n]	2			Yes				25-Jul-2013	Aricia artaxerxes				Natural History Museum of Neuchatel
LEPAA	LEPAA583-16	GBIFCH-BOL_LEPAA_0583		BOLD:AAA4731	CSCF-PAP-905783	654[0n]	2			Yes				04-Aug-2013	Aricia agestis				Natural History Museum of Neuchatel
LEPAA	LEPAA584-16	GBIFCH-BOL_LEPAA_0584		BOLD:AAA4731	CSCF-PAP-905784	654[0n]	2			Yes				04-Aug-2013	Aricia agestis				Natural History Museum of Neuchatel
LEPAA	LEPAA585-16	GBIFCH-BOL_LEPAA_0585		BOLD:ACE7893	CSCF-PAP-905781	654[0n]	2			Yes				05-Aug-2013	Aricia artaxerxes				Natural History Museum of Neuchatel
LEPAA	LEPAA586-16	GBIFCH-BOL_LEPAA_0586		BOLD:ABY4365	CSCF-PAP-961790	654[0n]	2			Yes				23-Jul-2014	Adscita geryon				Natural History Museum of Neuchatel
LEPAA	LEPAA587-16	GBIFCH-BOL_LEPAA_0587			CSCF-PAP-962500	0[n]				No				14-Aug-2014	Adscita alpina				Natural History Museum of Neuchatel
LEPAA	LEPAA588-16	GBIFCH-BOL_LEPAA_0588		BOLD:AAD5110	CSCF-PAP-961788	654[0n]	2			Yes				30-Jul-2014	Adscita alpina				Natural History Museum of Neuchatel
LEPAA	LEPAA589-16	GBIFCH-BOL_LEPAA_0589		BOLD:AAD5110	CSCF-PAP-961786	654[0n]	2			Yes				18-Jul-2014	Adscita statices				Natural History Museum of Neuchatel
LEPAA	LEPAA590-16	GBIFCH-BOL_LEPAA_0590		BOLD:ABY4365	CSCF-PAP-961785	654[0n]	2			Yes				03-Jul-2014	Adscita geryon				Natural History Museum of Neuchatel
LEPAA	LEPAA591-16	GBIFCH-BOL_LEPAA_0591		BOLD:AAD5110	CSCF-PAP-961794	654[0n]	2			Yes				08-Aug-2014	Adscita statices				Natural History Museum of Neuchatel
LEPAA	LEPAA592-16	GBIFCH-BOL_LEPAA_0592		BOLD:AAE2183	CSCF-PAP-962499	654[0n]	2			Yes				16-Jun-2014	Jordanita globulariae				Natural History Museum of Neuchatel
LEPAA	LEPAA593-16	GBIFCH-BOL_LEPAA_0593		BOLD:AAH9042	CSCF-PAP-963277	654[0n]	2			Yes				15-Jul-2014	Zygaena trifolii				Natural History Museum of Neuchatel
LEPAA	LEPAA594-16	GBIFCH-BOL_LEPAA_0594		BOLD:AAE6704	CSCF-PAP-963255	654[0n]	2			Yes				14-Aug-2014	Zygaena purpuralis				Natural History Museum of Neuchatel
LEPAA	LEPAA595-16	GBIFCH-BOL_LEPAA_0595			CSCF-PAP-963264	0[n]				No				27-May-2014	Zygaena purpuralis				Natural History Museum of Neuchatel
LEPAA	LEPAA596-16	GBIFCH-BOL_LEPAA_0596		BOLD:AAD7508	CSCF-PAP-963282	654[0n]	2			Yes				03-Jul-2014	Zygaena lonicerae				Natural History Museum of Neuchatel
LEPAA	LEPAA597-16	GBIFCH-BOL_LEPAA_0597		BOLD:AAD7508	CSCF-PAP-963285	563[0n]	2			Yes				13-Jun-2014	Zygaena lonicerae				Natural History Museum of Neuchatel
LEPAA	LEPAA598-16	GBIFCH-BOL_LEPAA_0598			CSCF-PAP-905921	0[n]				No				26-Jun-2013	Adscita alpina				Natural History Museum of Neuchatel
LEPAA	LEPAA599-16	GBIFCH-BOL_LEPAA_0599		BOLD:AAB1789	CSCF-PAP-622543	654[0n]	2			Yes				20-Aug-2009	Chazara briseis				Natural History Museum of Neuchatel
LEPAA	LEPAA600-16	GBIFCH-BOL_LEPAA_0600			CSCF-PAP-622189	0[n]				No				18-Jun-2009	Adscita dujardini				Natural History Museum of Neuchatel
LEPAA	LEPAA601-16	GBIFCH-BOL_LEPAA_0601			CSCF-PAP-692714	0[n]				No				19-Jul-2010	Adscita mannii				Natural History Museum of Neuchatel
LEPAA	LEPAA602-16	GBIFCH-BOL_LEPAA_0602			CSCF-PAP-692713	0[n]				No				06-Jul-2010	Jordanita globulariae				Natural History Museum of Neuchatel
LEPAA	LEPAA603-16	GBIFCH-BOL_LEPAA_0603		BOLD:AAU2256	CSCF-PAP-692715	654[0n]	2			Yes				06-Jul-2010	Jordanita notata				Natural History Museum of Neuchatel
LEPAA	LEPAA604-16	GBIFCH-BOL_LEPAA_0604			CSCF-PAP-618214	0[n]				No				10-Jul-2009	Jordanita subsolana				Natural History Museum of Neuchatel
LEPAA	LEPAA605-16	GBIFCH-BOL_LEPAA_0605			CSCF-PAP-618408	0[n]				No				04-Aug-2009	Zygaena minos				Natural History Museum of Neuchatel
LEPAA	LEPAA606-16	GBIFCH-BOL_LEPAA_0606			CSCF-PAP-486757	0[n]				No				01-Aug-2007	Aricia nicias				Natural History Museum of Neuchatel
LEPAA	LEPAA607-16	GBIFCH-BOL_LEPAA_0607			CSCF-PAP-622625	0[n]				No				08-Jul-2009	Coenonympha tullia				Natural History Museum of Neuchatel
LEPAA	LEPAA608-16	GBIFCH-BOL_LEPAA_0608			CSCF-PAP-975978	0[n]				No				30-Jul-2006	Erebia styx				Natural History Museum of Neuchatel
LEPAA	LEPAA609-16	GBIFCH-BOL_LEPAA_0609			CSCF-PAP-843690	0[n]				No				20-Jul-2012	Heteropterus morpheus				Natural History Museum of Neuchatel
LEPAA	LEPAA610-16	GBIFCH-BOL_LEPAA_0610			CSCF-PAP-693979	0[n]				No				23-Jun-2010	Melitaea britomartis				Natural History Museum of Neuchatel
LEPAA	LEPAA611-16	GBIFCH-BOL_LEPAA_0611			CSCF-PAP-906348	0[n]				No				12-Jul-2013	Scolitantides orion				Natural History Museum of Neuchatel
LEPAA	LEPAA612-16	GBIFCH-BOL_LEPAA_0613			CSCF-PAP-893644	0[n]				No				07-Jun-2013	Aglais urticae				Natural History Museum of Neuchatel
LEPAA	LEPAA613-16	GBIFCH-BOL_LEPAA_0614		BOLD:AAC3112	CSCF-PAP-890744	654[0n]	2			Yes				04-Jul-2013	Lasiommata petropolitana				Natural History Museum of Neuchatel
LEPAA	LEPAA614-16	GBIFCH-BOL_LEPAA_0615		BOLD:AAC8126	CSCF-PAP-913261	591[0n]	2			Yes				14-Jul-2013	Zygaena viciae				Natural History Museum of Neuchatel
LEPAA	LEPAA615-16	GBIFCH-BOL_LEPAA_0616		BOLD:AAA3628	CSCF-PAP-913084	654[0n]	2			Yes				05-Aug-2013	Plebejus idas				Natural History Museum of Neuchatel
LEPAA	LEPAA616-16	GBIFCH-BOL_LEPAA_0617		BOLD:AAD5110	CSCF-PAP-912666	654[0n]	2			Yes				14-Jul-2013	Adscita statices				Natural History Museum of Neuchatel
LEPAA	LEPAA617-16	GBIFCH-BOL_LEPAA_0618		BOLD:AAB2344	CSCF-PAP-893893	516[0n]	2			Yes				13-Aug-2013	Fabriciana adippe				Natural History Museum of Neuchatel
LEPAA	LEPAA618-16	GBIFCH-BOL_LEPAA_0619		BOLD:AAB2344	CSCF-PAP-912679	654[0n]	2			Yes				11-Jul-2013	Fabriciana adippe				Natural History Museum of Neuchatel
LEPAA	LEPAA619-16	GBIFCH-BOL_LEPAA_0620		BOLD:AAB1747	CSCF-PAP-912710	564[0n]	2			Yes				06-Jun-2013	Boloria euphrosyne				Natural History Museum of Neuchatel
LEPAA	LEPAA620-16	GBIFCH-BOL_LEPAA_0621		BOLD:ACF0844	CSCF-PAP-912780	654[0n]	2			Yes				15-Aug-2013	Colias phicomone				Natural History Museum of Neuchatel
LEPAA	LEPAA621-16	GBIFCH-BOL_LEPAA_0622		BOLD:AAA9082	CSCF-PAP-912784	654[0n]	2			Yes				15-Jul-2013	Cupido minimus				Natural History Museum of Neuchatel
LEPAA	LEPAA622-16	GBIFCH-BOL_LEPAA_0623		BOLD:AAJ0031	CSCF-PAP-912919	630[0n]	2			Yes				31-Jul-2013	Euphydryas cynthia				Natural History Museum of Neuchatel
LEPAA	LEPAA623-16	GBIFCH-BOL_LEPAA_0624		BOLD:AAA7508	CSCF-PAP-912917	654[0n]	2			No				15-Jul-2013	Euphydryas aurinia glaciegenita				Natural History Museum of Neuchatel
LEPAA	LEPAA624-16	GBIFCH-BOL_LEPAA_0625		BOLD:AAA6298	CSCF-PAP-912951	618[0n]	2			Yes				06-Jun-2013	Leptidea sinapis				Natural History Museum of Neuchatel
LEPAA	LEPAA625-16	GBIFCH-BOL_LEPAA_0626		BOLD:AAA3800	CSCF-PAP-912953	654[0n]	2			Yes				21-Aug-2013	Limenitis reducta				Natural History Museum of Neuchatel
LEPAA	LEPAA626-16	GBIFCH-BOL_LEPAA_0627		BOLD:AAC1068	CSCF-PAP-912954	654[0n]	2			Yes				11-Jul-2013	Lopinga achine				Natural History Museum of Neuchatel
LEPAA	LEPAA627-16	GBIFCH-BOL_LEPAA_0628			CSCF-PAP-905820	0[n]				No				05-Aug-2013	Polyommatus dorylas				Natural History Museum of Neuchatel
LEPAA	LEPAA628-16	GBIFCH-BOL_LEPAA_0629			CSCF-PAP-913254	0[n]				No				15-Aug-2013	Zygaena transalpina				Natural History Museum of Neuchatel
LEPAA	LEPAA629-16	GBIFCH-BOL_LEPAA_0630			CSCF-PAP-912959	0[n]				No				21-Aug-2013	Lycaena phlaeas				Natural History Museum of Neuchatel
LEPAA	LEPAA630-16	GBIFCH-BOL_LEPAA_0631		BOLD:AAA5321	CSCF-PAP-913078	654[0n]	2			Yes				16-Jul-2013	Agriades glandon				Natural History Museum of Neuchatel
LEPAA	LEPAA631-16	GBIFCH-BOL_LEPAA_0632		BOLD:ACE5088	CSCF-PAP-913132	654[0n]	2			Yes				16-Aug-2013	Pyrgus armoricanus				Natural History Museum of Neuchatel
LEPAA	LEPAA632-16	GBIFCH-BOL_LEPAA_0633		BOLD:ACE5088	CSCF-PAP-913133	606[0n]	2			No				19-Sep-2013	Pyrgus armoricanus				Natural History Museum of Neuchatel
LEPAA	LEPAA633-16	GBIFCH-BOL_LEPAA_0634		BOLD:AAB1728	CSCF-PAP-912962	654[0n]	2			Yes				31-Jul-2013	Lycaena tityrus subalpina				Natural History Museum of Neuchatel
LEPAA	LEPAA634-16	GBIFCH-BOL_LEPAA_0635		BOLD:AAA7584	CSCF-PAP-912999	654[0n]	2			Yes				11-Jul-2013	Melitaea nevadensis				Natural History Museum of Neuchatel
LEPAA	LEPAA635-16	GBIFCH-BOL_LEPAA_0636		BOLD:AAB5999	CSCF-PAP-913180	654[0n]	2			Yes				19-Sep-2013	Thecla betulae				Natural History Museum of Neuchatel
LEPAA	LEPAA636-16	GBIFCH-BOL_LEPAA_0637			CSCF-PAP-912691	0[n]				No				11-Aug-2013	Aricia agestis				Natural History Museum of Neuchatel
LEPAA	LEPAA637-16	GBIFCH-BOL_LEPAA_0638		BOLD:AAC4588	CSCF-PAP-913178	654[0n]	2			Yes				06-Jun-2013	Spialia sertorius				Natural History Museum of Neuchatel
LEPAA	LEPAA638-16	GBIFCH-BOL_LEPAA_0639		BOLD:ACE6682	CSCF-PAP-913034	654[0n]	2			Yes				15-Aug-2013	Parnassius apollo				Natural History Museum of Neuchatel
LEPAA	LEPAA639-16	GBIFCH-BOL_LEPAA_0640		BOLD:AAA3305	CSCF-PAP-913094	654[0n]	2			Yes				15-Aug-2013	Lysandra coridon				Natural History Museum of Neuchatel
LEPAA	LEPAA640-16	GBIFCH-BOL_LEPAA_0641		BOLD:AAA6761	CSCF-PAP-913191	654[0n]	2			Yes				11-Jul-2013	Thymelicus sylvestris				Natural History Museum of Neuchatel
LEPAA	LEPAA641-16	GBIFCH-BOL_LEPAA_0642		BOLD:AAA5115	CSCF-PAP-912721	654[0n]	2			Yes				31-Jul-2013	Boloria selene				Natural History Museum of Neuchatel
LEPAA	LEPAA642-16	GBIFCH-BOL_LEPAA_0643		BOLD:ACE9283	CSCF-PAP-913145	654[0n]	2			Yes				11-Jul-2013	Pyrgus cacaliae				Natural History Museum of Neuchatel
LEPAA	LEPAA643-16	GBIFCH-BOL_LEPAA_0644		BOLD:AAB3453	CSCF-PAP-890675	654[0n]	2			Yes				31-Jul-2013	Erebia tyndarus				Natural History Museum of Neuchatel
LEPAA	LEPAA644-16	GBIFCH-BOL_LEPAA_0645			CSCF-PAP-913245	0[n]				No				11-Jul-2013	Zygaena purpuralis				Natural History Museum of Neuchatel
LEPAA	LEPAA645-16	GBIFCH-BOL_LEPAA_0646		BOLD:AAF0158	CSCF-PAP-912864	654[0n]	2			Yes				15-Aug-2013	Erebia mnestra				Natural History Museum of Neuchatel
LEPAA	LEPAA646-16	GBIFCH-BOL_LEPAA_0647			CSCF-PAP-975979	0[n]				No				12-Jul-2009	Polyommatus amandus				Natural History Museum of Neuchatel
LEPAA	LEPAA647-16	GBIFCH-BOL_LEPAA_0648		BOLD:AAB3065	CSCF-PAP-744411	516[0n]	2			No				09-Jun-2011	Neptis rivularis				Natural History Museum of Neuchatel
LEPAA	LEPAA648-16	GBIFCH-BOL_LEPAA_0649			CSCF-PAP-618459	0[n]				No				01-Jul-2009	Melitaea asteria				Natural History Museum of Neuchatel
LEPAA	LEPAA649-16	GBIFCH-BOL_LEPAA_0650		BOLD:ABZ6967	CSCF-PAP-891030	654[0n]	2			Yes				12-Aug-2013	Pyrgus warrenensis				Natural History Museum of Neuchatel
LEPAA	LEPAA650-16	GBIFCH-BOL_LEPAA_0651		BOLD:AAU2845	CSCF-PAP-624457	654[0n]	2			No				19-Jul-2009	Zygaena osterodensis				Natural History Museum of Neuchatel
LEPAA	LEPAA651-16	GBIFCH-BOL_LEPAA_0652		BOLD:AAE6704	CSCF-PAP-624480	658[0n]	2			Yes				08-Jul-2009	Zygaena minos				Natural History Museum of Neuchatel
LEPAA	LEPAA652-16	GBIFCH-BOL_LEPAA_0653			CSCF-PAP-913174	0[n]				No				16-Jul-2013	Pyronia tithonus				Natural History Museum of Neuchatel
LEPAA	LEPAA653-16	GBIFCH-BOL_LEPAA_0654			CSCF-PAP-913016	474[1n]	2			No				03-Sep-2013	Favonius quercus				Natural History Museum of Neuchatel
LEPAA	LEPAA654-16	GBIFCH-BOL_LEPAA_0655		BOLD:AAA7785	CSCF-PAP-912974	654[0n]	2			Yes				11-Jul-2013	Maniola jurtina				Natural History Museum of Neuchatel
LEPAA	LEPAA655-16	GBIFCH-BOL_LEPAA_0656			CSCF-PAP-913170	0[n]				No				03-Aug-2013	Pyrgus armoricanus				Natural History Museum of Neuchatel
LEPAA	LEPAA656-16	GBIFCH-BOL_LEPAA_0657		BOLD:AAA9222	CSCF-PAP-962436	654[0n]	2			Yes				06-Mar-2014	Gonepteryx rhamni				Natural History Museum of Neuchatel
LEPAA	LEPAA657-16	GBIFCH-BOL_LEPAA_0658		BOLD:AAA5531	CSCF-PAP-962232	636[0n]	2			Yes				05-Jun-2014	Colias hyale				Natural History Museum of Neuchatel
LEPAA	LEPAA658-16	GBIFCH-BOL_LEPAA_0659		BOLD:ABZ4715	CSCF-PAP-962226	654[0n]	2			Yes				12-Jun-2014	Colias alfacariensis				Natural History Museum of Neuchatel
LEPAA	LEPAA659-16	GBIFCH-BOL_LEPAA_0660		BOLD:AAB0552	CSCF-PAP-962935	654[0n]	2			Yes				20-Apr-2014	Pieris brassicae				Natural History Museum of Neuchatel
LEPAA	LEPAA660-16	GBIFCH-BOL_LEPAA_0661		BOLD:ABZ4715	CSCF-PAP-962214	654[0n]	2			Yes				10-Jun-2014	Colias alfacariensis				Natural History Museum of Neuchatel
LEPAA	LEPAA661-16	GBIFCH-BOL_LEPAA_0662		BOLD:AAA2226	CSCF-PAP-962963	654[0n]	2			Yes				24-May-2014	Pieris napi				Natural History Museum of Neuchatel
LEPAA	LEPAA662-16	GBIFCH-BOL_LEPAA_0663		BOLD:AAB1698	CSCF-PAP-961944	633[0n]	2			Yes				05-Aug-2014	Araschnia levana				Natural History Museum of Neuchatel
LEPAA	LEPAA663-16	GBIFCH-BOL_LEPAA_0664		BOLD:AAA7584	CSCF-PAP-962805	654[0n]	2			Yes				06-Aug-2014	Melitaea nevadensis				Natural History Museum of Neuchatel
LEPAA	LEPAA664-16	GBIFCH-BOL_LEPAA_0665			CSCF-PAP-962259	0[n]				No				22-Aug-2014	Cupido argiades				Natural History Museum of Neuchatel
LEPAA	LEPAA665-16	GBIFCH-BOL_LEPAA_0666			CSCF-PAP-962601	423[0n]	2			No				05-Aug-2014	Lycaena tityrus tityrus				Natural History Museum of Neuchatel
LEPAA	LEPAA666-16	GBIFCH-BOL_LEPAA_0667		BOLD:AAB3453	CSCF-PAP-962304	654[0n]	2			Yes				06-Aug-2014	Erebia arvernensis				Natural History Museum of Neuchatel
LEPAA	LEPAA667-16	GBIFCH-BOL_LEPAA_0668		BOLD:AAB5180	CSCF-PAP-962335	592[0n]	2			Yes				06-Aug-2014	Erebia manto				Natural History Museum of Neuchatel
LEPAA	LEPAA668-16	GBIFCH-BOL_LEPAA_0669		BOLD:AAB3935	CSCF-PAP-963139	654[0n]	2			Yes				22-Aug-2014	Pyronia tithonus				Natural History Museum of Neuchatel
LEPAA	LEPAA669-16	GBIFCH-BOL_LEPAA_0670			CSCF-PAP-843716	0[n]				No				07-Sep-2012	Lampides boeticus				Natural History Museum of Neuchatel
LEPAA	LEPAA670-16	GBIFCH-BOL_LEPAA_0671		BOLD:ACE5691	CSCF-PAP-975980	549[0n]	2			No				05-Jul-2001	Oeneis glacialis				Natural History Museum of Neuchatel
LEPAA	LEPAA671-16	GBIFCH-BOL_LEPAA_0672			CSCF-PAP-490359	0[n]				No				02-Jul-1998	Phengaris alcon				Natural History Museum of Neuchatel
LEPAA	LEPAA672-16	GBIFCH-BOL_LEPAA_0673		BOLD:ABY4365	CSCF-PAP-782282	654[0n]	2			Yes				16-Jul-2011	Adscita geryon				Natural History Museum of Neuchatel
LEPAA	LEPAA673-16	GBIFCH-BOL_LEPAA_0674			CSCF-PAP-490350	0[n]				No				23-Jul-1998	Lysandra coridon				Natural History Museum of Neuchatel
LEPAA	LEPAA674-16	GBIFCH-BOL_LEPAA_0675			CSCF-PAP-490516	0[n]				No				07-Aug-1999	Zygaena exulans				Natural History Museum of Neuchatel
LEPAA	LEPAA675-16	GBIFCH-BOL_LEPAA_0676			CSCF-PAP-975984	0[n]				No				10-Jul-2005	Lycaena virgaureae				Natural History Museum of Neuchatel
LEPAA	LEPAA676-16	GBIFCH-BOL_LEPAA_0677			CSCF-PAP-622746	0[n]				No				29-Aug-2009	Cupido argiades				Natural History Museum of Neuchatel
LEPAA	LEPAA677-16	GBIFCH-BOL_LEPAA_0678			CSCF-PAP-757685	0[n]				No				20-Jul-2010	Coenonympha gardetta				Natural History Museum of Neuchatel
LEPAA	LEPAA678-16	GBIFCH-BOL_LEPAA_0679			CSCF-PAP-975981	0[n]				No					Euchloe simplonia				Natural History Museum of Neuchatel	collection time 1990
LEPAA	LEPAA679-16	GBIFCH-BOL_LEPAA_0680			CSCF-PAP-975982	0[n]				No				07-Jul-1999	Colias palaeno				Natural History Museum of Neuchatel
LEPAA	LEPAA680-16	GBIFCH-BOL_LEPAA_0681			CSCF-PAP-975983	0[n]				No				09-Aug-1999	Argynnis paphia				Natural History Museum of Neuchatel
LEPAA	LEPAA681-16	GBIFCH-BOL_LEPAA_0682		BOLD:AAB5533	CSCF-PAP-962095	570[0n]	2			Yes				22-Aug-2014	Brintesia circe				Natural History Museum of Neuchatel
LEPAA	LEPAA682-16	GBIFCH-BOL_LEPAA_0683			CSCF-PAP-490172	0[n]				No				03-Jul-1997	Boloria titania				Natural History Museum of Neuchatel
LEPAA	LEPAA683-16	GBIFCH-BOL_LEPAA_0684			CSCF-PAP-490404	0[n]				No				02-Jul-1998	Lycaena hippothoe				Natural History Museum of Neuchatel
LEPAA	LEPAA684-16	GBIFCH-BOL_LEPAA_0685		BOLD:AAB5533	CSCF-PAP-490150	585[0n]	2			Yes				14-Jul-1995	Brintesia circe				Natural History Museum of Neuchatel
LEPAA	LEPAA685-16	GBIFCH-BOL_LEPAA_0686		BOLD:AAB0969	CSCF-PAP-975986	636[0n]	2			Yes				04-Aug-2014	Erebia epiphron				Natural History Museum of Neuchatel
LEPAA	LEPAA686-16	GBIFCH-BOL_LEPAA_0687		BOLD:ABZ6967	CSCF-PAP-975987	654[0n]	2			Yes				07-Jun-2014	Pyrgus alveus				Natural History Museum of Neuchatel
LEPAA	LEPAA687-16	GBIFCH-BOL_LEPAA_0688		BOLD:AAA9654	CSCF-PAP-963096	612[0n]	2			No				28-May-2014	Pseudophilotes baton				Natural History Museum of Neuchatel
LEPAA	LEPAA688-16	GBIFCH-BOL_LEPAA_0689		BOLD:ABX6048	CSCF-PAP-962261	618[0n]	2			No				31-Jul-2014	Cupido argiades				Natural History Museum of Neuchatel
LEPAA	LEPAA689-16	GBIFCH-BOL_LEPAA_0690		BOLD:AAB6478	CSCF-PAP-962983	618[0n]	2			Yes				16-May-2014	Kretania trappi				Natural History Museum of Neuchatel
LEPAA	LEPAA690-16	GBIFCH-BOL_LEPAA_0691		BOLD:AAB3027	CSCF-PAP-963081	654[0n]	2			Yes				27-Jun-2014	Cyaniris semiargus				Natural History Museum of Neuchatel
LEPAA	LEPAA691-16	GBIFCH-BOL_LEPAA_0692		BOLD:ABY4448	CSCF-PAP-962253	654[0n]	2			Yes				21-May-2014	Cupido alcetas				Natural History Museum of Neuchatel
LEPAA	LEPAA692-16	GBIFCH-BOL_LEPAA_0693		BOLD:ACE7893	CSCF-PAP-962012	654[0n]	2			Yes				10-Jun-2014	Aricia artaxerxes				Natural History Museum of Neuchatel
LEPAA	LEPAA693-16	GBIFCH-BOL_LEPAA_0694		BOLD:AAB8947	CSCF-PAP-962588	654[0n]	2			Yes				27-Jun-2014	Lycaena hippothoe eurydice				Natural History Museum of Neuchatel
LEPAA	LEPAA694-16	GBIFCH-BOL_LEPAA_0695		BOLD:AAB1698	CSCF-PAP-961946	654[0n]	2			Yes				17-Jun-2014	Araschnia levana				Natural History Museum of Neuchatel
LEPAA	LEPAA695-16	GBIFCH-BOL_LEPAA_0696		BOLD:AAB5849	CSCF-PAP-962031	633[0n]	2			Yes				20-Jun-2014	Boloria dia				Natural History Museum of Neuchatel
LEPAA	LEPAA696-16	GBIFCH-BOL_LEPAA_0697		BOLD:AAB3306	CSCF-PAP-962569	654[0n]	2			Yes				31-Jul-2014	Lycaena alciphron				Natural History Museum of Neuchatel
LEPAA	LEPAA697-16	GBIFCH-BOL_LEPAA_0698		BOLD:AAB5849	CSCF-PAP-962026	621[0n]	2			No				12-Jun-2014	Boloria dia				Natural History Museum of Neuchatel
LEPAA	LEPAA698-16	GBIFCH-BOL_LEPAA_0699		BOLD:AAA8828	CSCF-PAP-962745	654[0n]	2			Yes				05-Jun-2014	Melitaea aurelia				Natural History Museum of Neuchatel
LEPAA	LEPAA699-16	GBIFCH-BOL_LEPAA_0700		BOLD:AAC1068	CSCF-PAP-962564	654[0n]	2			Yes				12-Jun-2014	Lopinga achine				Natural History Museum of Neuchatel
LEPAA	LEPAA700-16	GBIFCH-BOL_LEPAA_0701		BOLD:ACM8089	CSCF-PAP-962478	654[0n]	2			Yes				21-May-2014	Iolana iolas				Natural History Museum of Neuchatel
LEPAA	LEPAA701-16	GBIFCH-BOL_LEPAA_0702		BOLD:AAC6392	CSCF-PAP-963141	612[0n]	2			Yes				06-Jun-2014	Satyrium pruni				Natural History Museum of Neuchatel
LEPAA	LEPAA702-16	GBIFCH-BOL_LEPAA_0703		BOLD:AAC6392	CSCF-PAP-963142	612[0n]	2			Yes				17-Jun-2014	Satyrium pruni				Natural History Museum of Neuchatel
LEPAA	LEPAA703-16	GBIFCH-BOL_LEPAA_0704		BOLD:AAB3703	CSCF-PAP-963088	654[0n]	2			Yes				21-May-2014	Polyommatus thersites				Natural History Museum of Neuchatel
LEPAA	LEPAA704-16	GBIFCH-BOL_LEPAA_0705			CSCF-PAP-962581	0[n]				No				20-May-2014	Lycaena helle				Natural History Museum of Neuchatel
LEPAA	LEPAA705-16	GBIFCH-BOL_LEPAA_0706		BOLD:AAB5175	CSCF-PAP-962576	637[0n]	2			Yes				10-Jun-2014	Lycaena helle				Natural History Museum of Neuchatel
LEPAA	LEPAA706-16	GBIFCH-BOL_LEPAA_0707			CSCF-PAP-963143	0[n]				No				16-Jul-2014	Satyrium w-album				Natural History Museum of Neuchatel
LEPAA	LEPAA707-16	GBIFCH-BOL_LEPAA_0708		BOLD:AAA7508	CSCF-PAP-962393	654[0n]	2			Yes				27-Jun-2014	Euphydryas aurinia aurinia				Natural History Museum of Neuchatel
LEPAA	LEPAA708-16	GBIFCH-BOL_LEPAA_0709		BOLD:AAA3082	CSCF-PAP-962764	654[0n]	2			Yes				27-Jun-2014	Melitaea diamina				Natural History Museum of Neuchatel
LEPAA	LEPAA709-16	GBIFCH-BOL_LEPAA_0710		BOLD:AAB8731	CSCF-PAP-962438	654[0n]	2			Yes				21-May-2014	Hamearis lucina				Natural History Museum of Neuchatel
LEPAA	LEPAA710-16	GBIFCH-BOL_LEPAA_0711		BOLD:AAB3509	CSCF-PAP-962829	654[0n]	2			Yes				01-May-2014	Nymphalis polychloros				Natural History Museum of Neuchatel
LEPAA	LEPAA711-16	GBIFCH-BOL_LEPAA_0712		BOLD:AAA9909	CSCF-PAP-962463	654[0n]	2			Yes				14-Aug-2014	Hyponephele lycaon				Natural History Museum of Neuchatel
LEPAA	LEPAA712-16	GBIFCH-BOL_LEPAA_0713		BOLD:AAB5180	CSCF-PAP-962301	654[0n]	2			Yes				18-Jul-2014	Erebia bubastis				Natural History Museum of Neuchatel
LEPAA	LEPAA713-16	GBIFCH-BOL_LEPAA_0714		BOLD:AAB6141	CSCF-PAP-963122	618[0n]	2			No				08-Jun-2014	Pyrgus malvoides				Natural History Museum of Neuchatel
LEPAA	LEPAA714-16	GBIFCH-BOL_LEPAA_0715			CSCF-PAP-962457	0[n]				No				20-Jun-2014	Hipparchia genava				Natural History Museum of Neuchatel
LEPAA	LEPAA715-16	GBIFCH-BOL_LEPAA_0716		BOLD:ACF8911	CSCF-PAP-962753	631[0n]	2			Yes				05-Jun-2014	Melitaea deione				Natural History Museum of Neuchatel
LEPAA	LEPAA716-16	GBIFCH-BOL_LEPAA_0717			CSCF-PAP-962065	0[n]				No				18-Jul-2014	Boloria selene				Natural History Museum of Neuchatel
LEPAA	LEPAA717-16	GBIFCH-BOL_LEPAA_0718		BOLD:ABZ5868	CSCF-PAP-962068	654[0n]	2			Yes				16-Jul-2014	Boloria thore				Natural History Museum of Neuchatel
LEPAA	LEPAA718-16	GBIFCH-BOL_LEPAA_0719		BOLD:AAB3509	CSCF-PAP-962837	654[0n]	2			Yes				04-Jul-2014	Nymphalis polychloros				Natural History Museum of Neuchatel
LEPAA	LEPAA719-16	GBIFCH-BOL_LEPAA_0720		BOLD:AAA9312	CSCF-PAP-962090	584[0n]	2			Yes				17-Jun-2014	Brenthis ino				Natural History Museum of Neuchatel
LEPAA	LEPAA720-16	GBIFCH-BOL_LEPAA_0721		BOLD:AAA5115	CSCF-PAP-962061	609[0n]	2			Yes				27-Jun-2014	Boloria selene				Natural History Museum of Neuchatel
LEPAA	LEPAA721-16	GBIFCH-BOL_LEPAA_0722		BOLD:AAA9406	CSCF-PAP-962025	510[1n]	2			No				15-Aug-2014	Boloria aquilonaris				Natural History Museum of Neuchatel
LEPAA	LEPAA722-16	GBIFCH-BOL_LEPAA_0723		BOLD:ACE4022	CSCF-PAP-962573	550[0n]	2			Yes				12-Jun-2014	Lycaena dispar				Natural History Museum of Neuchatel
LEPAA	LEPAA723-16	GBIFCH-BOL_LEPAA_0724		BOLD:AAU2845	CSCF-PAP-963250	582[0n]	2			Yes				16-Jun-2014	Zygaena osterodensis				Natural History Museum of Neuchatel
LEPAA	LEPAA724-16	GBIFCH-BOL_LEPAA_0725		BOLD:AAB3453	CSCF-PAP-962350	654[0n]	2			Yes				08-Aug-2014	Erebia nivalis				Natural History Museum of Neuchatel
LEPAA	LEPAA725-16	GBIFCH-BOL_LEPAA_0726		BOLD:AAX8625	CSCF-PAP-962323	579[0n]	2			Yes				17-Jul-2014	Erebia flavofasciata				Natural History Museum of Neuchatel
LEPAA	LEPAA726-16	GBIFCH-BOL_LEPAA_0727		BOLD:AAA7166	CSCF-PAP-962821	612[0n]	2			Yes				17-Jun-2014	Nymphalis antiopa				Natural History Museum of Neuchatel
LEPAA	LEPAA727-16	GBIFCH-BOL_LEPAA_0728		BOLD:AAB3935	CSCF-PAP-963138	438[0n]	2			No				29-Jul-2014	Pyronia tithonus				Natural History Museum of Neuchatel
LEPAA	LEPAA728-16	GBIFCH-BOL_LEPAA_0729			CSCF-PAP-962179	0[n]				No				03-Jul-2014	Coenonympha glycerion				Natural History Museum of Neuchatel
LEPAA	LEPAA729-16	GBIFCH-BOL_LEPAA_0730		BOLD:ACF1425	CSCF-PAP-962148	654[0n]	2			Yes				23-Jun-2014	Coenonympha arcania				Natural History Museum of Neuchatel
LEPAA	LEPAA730-16	GBIFCH-BOL_LEPAA_0731		BOLD:AAB8291	CSCF-PAP-962557	570[0n]	2			Yes				16-Jul-2014	Limenitis camilla				Natural History Museum of Neuchatel
LEPAA	LEPAA731-16	GBIFCH-BOL_LEPAA_0732		BOLD:AAB7458	CSCF-PAP-961873	606[0n]	2			Yes				12-Jun-2014	Apatura ilia				Natural History Museum of Neuchatel
LEPAA	LEPAA732-16	GBIFCH-BOL_LEPAA_0733		BOLD:ABY6108	CSCF-PAP-963113	618[0n]	2			Yes				21-May-2014	Pyrgus carthami				Natural History Museum of Neuchatel
LEPAA	LEPAA733-16	GBIFCH-BOL_LEPAA_0734		BOLD:AAB3518	CSCF-PAP-962623	567[0n]	2			Yes				14-Jul-2014	Phengaris nausithous				Natural History Museum of Neuchatel
LEPAA	LEPAA734-16	GBIFCH-BOL_LEPAA_0735		BOLD:AAC8126	CSCF-PAP-963280	654[0n]	2			Yes				17-Jun-2014	Zygaena viciae				Natural History Museum of Neuchatel
LEPAA	LEPAA735-16	GBIFCH-BOL_LEPAA_0736		BOLD:ABY7914	CSCF-PAP-963130	615[0n]	2			Yes				17-Apr-2014	Pyrgus onopordi				Natural History Museum of Neuchatel
LEPAA	LEPAA736-16	GBIFCH-BOL_LEPAA_0737		BOLD:AAC4588	CSCF-PAP-963160	654[0n]	2			Yes				15-May-2014	Spialia sertorius				Natural History Museum of Neuchatel
LEPAA	LEPAA737-16	GBIFCH-BOL_LEPAA_0738		BOLD:AAB6141	CSCF-PAP-963115	654[0n]	2			Yes				21-May-2014	Pyrgus malvae				Natural History Museum of Neuchatel
LEPAA	LEPAA738-16	GBIFCH-BOL_LEPAA_0739		BOLD:AAD0075	CSCF-PAP-962562	654[0n]	2			Yes				17-Jun-2014	Limenitis populi				Natural History Museum of Neuchatel
LEPAA	LEPAA739-16	GBIFCH-BOL_LEPAA_0740		BOLD:AAB7458	CSCF-PAP-961872	651[0n]	2			Yes				03-Jul-2014	Apatura ilia				Natural History Museum of Neuchatel
LEPAA	LEPAA740-16	GBIFCH-BOL_LEPAA_0741		BOLD:AAB2272	CSCF-PAP-962482	639[0n]	2			Yes				01-May-2014	Iphiclides podalirius				Natural History Museum of Neuchatel
LEPAA	LEPAA741-16	GBIFCH-BOL_LEPAA_0742		BOLD:AAB5533	CSCF-PAP-962096	621[0n]	2			Yes				27-Jun-2014	Brintesia circe				Natural History Museum of Neuchatel
LEPAA	LEPAA742-16	GBIFCH-BOL_LEPAA_0743		BOLD:AAA3343	CSCF-PAP-962928	613[0n]	2			Yes				01-May-2014	Parnassius mnemosyne				Natural History Museum of Neuchatel
LEPAA	LEPAA743-16	GBIFCH-BOL_LEPAA_0744		BOLD:AAL0274	CSCF-PAP-962313	654[0n]	2			Yes				18-Jul-2014	Erebia eriphyle				Natural History Museum of Neuchatel
LEPAA	LEPAA744-16	GBIFCH-BOL_LEPAA_0745		BOLD:AAA6298	CSCF-PAP-962547	654[0n]	2			Yes				01-May-2014	Leptidea sinapis				Natural History Museum of Neuchatel
LEPAA	LEPAA745-16	GBIFCH-BOL_LEPAA_0746			CSCF-PAP-963286	0[n]				No				29-Jun-2014	Rhagades pruni				Natural History Museum of Neuchatel
LEPAA	LEPAA746-16	GBIFCH-BOL_LEPAA_0747			CSCF-PAP-962122	0[n]				No				23-Jul-2014	Carcharodus floccifera				Natural History Museum of Neuchatel
LEPAA	LEPAA747-16	GBIFCH-BOL_LEPAA_0748		BOLD:AAH8372	CSCF-PAP-963207	654[0n]	2			Yes				27-Jul-2014	Zygaena carniolica				Natural History Museum of Neuchatel
LEPAA	LEPAA748-16	GBIFCH-BOL_LEPAA_0749			CSCF-PAP-962237	0[n]				No				27-Jun-2014	Colias palaeno				Natural History Museum of Neuchatel
LEPAA	LEPAA749-16	GBIFCH-BOL_LEPAA_0750		BOLD:AAB3783	CSCF-PAP-962940	654[0n]	2			Yes				24-May-2014	Pieris mannii				Natural History Museum of Neuchatel
LEPAA	LEPAA750-16	GBIFCH-BOL_LEPAA_0751		BOLD:AAC4737	CSCF-PAP-963145	654[0n]	2			Yes				23-Jun-2014	Satyrus ferula				Natural History Museum of Neuchatel
LEPAA	LEPAA751-16	GBIFCH-BOL_LEPAA_0752		BOLD:AAB7905	CSCF-PAP-961881	654[0n]	2			Yes				04-Jul-2014	Apatura iris				Natural History Museum of Neuchatel
LEPAA	LEPAA752-16	GBIFCH-BOL_LEPAA_0753		BOLD:AAA8638	CSCF-PAP-963193	654[0n]	2			Yes				04-Jul-2014	Vanessa atalanta				Natural History Museum of Neuchatel
LEPAA	LEPAA753-16	GBIFCH-BOL_LEPAA_0754			CSCF-PAP-962124	0[n]				No				05-Jun-2014	Carcharodus lavatherae				Natural History Museum of Neuchatel
LEPAA	LEPAA754-16	GBIFCH-BOL_LEPAA_0755			CSCF-PAP-963102	0[n]				No				27-Jul-2014	Pyrgus alveus				Natural History Museum of Neuchatel
LEPAA	LEPAA755-16	GBIFCH-BOL_LEPAA_0756		BOLD:AAH8372	CSCF-PAP-963206	654[0n]	2			Yes				31-Jul-2014	Zygaena carniolica				Natural History Museum of Neuchatel
LEPAA	LEPAA756-16	GBIFCH-BOL_LEPAA_0757		BOLD:AAB2344	CSCF-PAP-961967	654[0n]	2			Yes				12-Jun-2014	Fabriciana adippe				Natural History Museum of Neuchatel
LEPAA	LEPAA757-16	GBIFCH-BOL_LEPAA_0758		BOLD:AAA8264	CSCF-PAP-963287	624[0n]	2			No				08-Jun-2014	Erebia euryale				Natural History Museum of Neuchatel
LEPAA	LEPAA758-16	GBIFCH-BOL_LEPAA_0759		BOLD:ADF1340	CSCF-PAP-963265	654[0n]	2			Yes				23-Jun-2014	Zygaena romeo				Natural History Museum of Neuchatel
LEPAA	LEPAA759-16	GBIFCH-BOL_LEPAA_0760		BOLD:AAB3306	CSCF-PAP-962570	633[0n]	2			Yes				05-Jun-2014	Lycaena alciphron				Natural History Museum of Neuchatel
LEPAA	LEPAA760-16	GBIFCH-BOL_LEPAA_0761		BOLD:AAB1747	CSCF-PAP-962039	654[0n]	2			Yes				06-Jun-2014	Boloria euphrosyne				Natural History Museum of Neuchatel
LEPAA	LEPAA761-16	GBIFCH-BOL_LEPAA_0762			CSCF-PAP-704762	0[n]				No				18-Jun-2010	Jordanita subsolana				Natural History Museum of Neuchatel
LEPAA	LEPAA762-16	GBIFCH-BOL_LEPAA_0763		BOLD:ACE3919	CSCF-PAP-687225	654[0n]	2			Yes				28-Jun-2009	Jordanita subsolana				Natural History Museum of Neuchatel
LEPAA	LEPAA763-16	GBIFCH-BOL_LEPAA_0764			CSCF-PAP-635910	0[n]				No				17-Jun-2009	Jordanita globulariae				Natural History Museum of Neuchatel
LEPAA	LEPAA764-16	GBIFCH-BOL_LEPAA_0765			CSCF-PAP-627883	0[n]				No				06-Aug-2009	Aricia nicias				Natural History Museum of Neuchatel
LEPAA	LEPAA765-16	GBIFCH-BOL_LEPAA_0766		BOLD:AAH8372	CSCF-PAP-699230	654[0n]	2			Yes				28-Jul-2010	Zygaena carniolica				Natural History Museum of Neuchatel
LEPAA	LEPAA766-16	GBIFCH-BOL_LEPAA_0767		BOLD:AAC2719	CSCF-PAP-697296	567[0n]	2			Yes				04-Aug-2010	Carcharodus lavatherae				Natural History Museum of Neuchatel
LEPAA	LEPAA767-16	GBIFCH-BOL_LEPAA_0768			CSCF-PAP-639358	0[n]				No				13-Jul-2009	Carcharodus floccifera				Natural History Museum of Neuchatel
LEPAA	LEPAA768-16	GBIFCH-BOL_LEPAA_0769		BOLD:AAE6704	CSCF-PAP-617701	612[0n]	2			Yes				03-Jun-2009	Zygaena minos				Natural History Museum of Neuchatel
LEPAA	LEPAA769-16	GBIFCH-BOL_LEPAA_0770			CSCF-PAP-696905	0[n]				No				24-Jun-2010	Zygaena purpuralis				Natural History Museum of Neuchatel
LEPAA	LEPAA770-16	GBIFCH-BOL_LEPAA_0771			CSCF-PAP-661204	0[n]				No				29-Jun-2009	Zygaena minos				Natural History Museum of Neuchatel
LEPAA	LEPAA771-16	GBIFCH-BOL_LEPAA_0772			CSCF-PAP-642116	0[n]				No				08-Jul-2009	Phengaris alcon				Natural History Museum of Neuchatel
LEPAA	LEPAA772-16	GBIFCH-BOL_LEPAA_0773			CSCF-PAP-330126	0[n]				No				04-Jun-2003	Cupido osiris				Natural History Museum of Neuchatel
LEPAA	LEPAA773-16	GBIFCH-BOL_LEPAA_0774			CSCF-PAP-642248		2			No				28-Jul-2009	Erebia flavofasciata				Natural History Museum of Neuchatel
LEPAA	LEPAA774-16	GBIFCH-BOL_LEPAA_0775			CSCF-PAP-635887	0[n]				No				14-Jul-2009	Erebia nivalis				Natural History Museum of Neuchatel
LEPAA	LEPAA775-16	GBIFCH-BOL_LEPAA_0776			CSCF-PAP-308574	0[n]				No				02-Jul-2003	Iolana iolas				Natural History Museum of Neuchatel
LEPAA	LEPAA776-16	GBIFCH-BOL_LEPAA_0777			CSCF-PAP-632388	0[n]				No				16-Jul-2009	Erebia pronoe				Natural History Museum of Neuchatel
LEPAA	LEPAA777-16	GBIFCH-BOL_LEPAA_0778		BOLD:AAC5456	CSCF-PAP-632386	558[0n]	2			Yes				16-Jul-2009	Erebia meolans				Natural History Museum of Neuchatel
LEPAA	LEPAA778-16	GBIFCH-BOL_LEPAA_0779			CSCF-PAP-616866	0[n]				No				20-Jul-2009	Erebia styx				Natural History Museum of Neuchatel
LEPAA	LEPAA779-16	GBIFCH-BOL_LEPAA_0780		BOLD:AAB8291	CSCF-PAP-1004104	651[0n]	2			No				01-Jul-2014	Limenitis camilla				Natural History Museum of Neuchatel
LEPAA	LEPAA780-16	GBIFCH-BOL_LEPAA_0781		BOLD:AAA9312	CSCF-PAP-1004069	654[0n]	2			Yes				18-Jul-2014	Brenthis daphne				Natural History Museum of Neuchatel
LEPAA	LEPAA781-16	GBIFCH-BOL_LEPAA_0782	36119	BOLD:AAC0485	CSCF-PAP-777970	654[0n]	2			Yes				12-Jul-2011	Hipparchia genava				Natural History Museum of Neuchatel
LEPAA	LEPAA782-16	GBIFCH-BOL_LEPAA_0783		BOLD:AAC0485	CSCF-PAP-1004096	654[0n]	2			Yes				10-Aug-2013	Hipparchia genava				Natural History Museum of Neuchatel
LEPAA	LEPAA783-16	GBIFCH-BOL_LEPAA_0784		BOLD:AAC5377	CSCF-PAP-1004087	654[0n]	2			Yes				17-Aug-2014	Erebia sudetica				Natural History Museum of Neuchatel
LEPAA	LEPAA784-16	GBIFCH-BOL_LEPAA_0785		BOLD:AAB4303	CSCF-PAP-1004111	471[0n]	2			No				25-Jul-2014	Phengaris alcon				Natural History Museum of Neuchatel
LEPAA	LEPAA785-16	GBIFCH-BOL_LEPAA_0786		BOLD:AAA4515	CSCF-PAP-905810	654[0n]	2			Yes				22-Aug-2013	Pararge aegeria				Natural History Museum of Neuchatel
LEPAA	LEPAA786-16	GBIFCH-BOL_LEPAA_0787		BOLD:AAB3453	CSCF-PAP-635874	606[0n]	2			Yes				26-Jul-2009	Erebia arvernensis				Natural History Museum of Neuchatel
LEPAA	LEPAA787-16	GBIFCH-BOL_LEPAA_0788			CSCF-PAP-1004150	0[n]				No				03-Jul-2014	Zygaena osterodensis				Natural History Museum of Neuchatel
LEPAA	LEPAA788-16	GBIFCH-BOL_LEPAA_0789		BOLD:ACE5088	CSCF-PAP-1004137	654[0n]	2			Yes				24-Aug-2014	Pyrgus armoricanus				Natural History Museum of Neuchatel
LEPAA	LEPAA789-16	GBIFCH-BOL_LEPAA_0790			CSCF-PAP-697245	0[n]				No				24-May-2010	Scolitantides orion				Natural History Museum of Neuchatel
LEPAA	LEPAA790-16	GBIFCH-BOL_LEPAA_0791			CSCF-PAP-629361	0[n]				No				01-Jun-2009	Cupido osiris				Natural History Museum of Neuchatel
LEPAA	LEPAA791-16	GBIFCH-BOL_LEPAA_0792			CSCF-PAP-699497	0[n]				No				24-Jun-2010	Kretania trappi				Natural History Museum of Neuchatel
LEPAA	LEPAA792-16	GBIFCH-BOL_LEPAA_0793			CSCF-PAP-1004135	0[n]				No				05-May-2014	Pseudophilotes baton				Natural History Museum of Neuchatel
LEPAA	LEPAA793-16	GBIFCH-BOL_LEPAA_0794			CSCF-PAP-626837	0[n]				No				02-Jul-2009	Plebejus argyrognomon				Natural History Museum of Neuchatel
LEPAA	LEPAA794-16	GBIFCH-BOL_LEPAA_0795			CSCF-PAP-642122	0[n]				No				07-Jul-2009	Satyrium ilicis				Natural History Museum of Neuchatel
LEPAA	LEPAA795-16	GBIFCH-BOL_LEPAA_0796			CSCF-PAP-632339	0[n]				No				16-Jul-2009	Satyrium spini				Natural History Museum of Neuchatel
LEPAA	LEPAA796-16	GBIFCH-BOL_LEPAA_0797		BOLD:ABX6143	CSCF-PAP-1004129	654[0n]	2			Yes				17-Jul-2014	Polyommatus amandus				Natural History Museum of Neuchatel
LEPAA	LEPAA797-16	GBIFCH-BOL_LEPAA_0798		BOLD:ABY4365	CSCF-PAP-782261	654[0n]	2			Yes				28-Jun-2010	Adscita geryon				Natural History Museum of Neuchatel
LEPAA	LEPAA798-16	GBIFCH-BOL_LEPAA_0799		BOLD:AAB6628	CSCF-PAP-629335	654[0n]	2			Yes				16-Jul-2009	Satyrium ilicis				Natural History Museum of Neuchatel
LEPAA	LEPAA799-16	GBIFCH-BOL_LEPAA_0800		BOLD:AAB7639	CSCF-PAP-782711	654[0n]	2			Yes				21-Jun-2011	Pyrgus serratulae				Natural History Museum of Neuchatel
LEPAA	LEPAA800-16	GBIFCH-BOL_LEPAA_0801			CSCF-PAP-270879	0[n]				No				17-Aug-2000	Pyrgus cirsii				Natural History Museum of Neuchatel
LEPAA	LEPAA801-16	GBIFCH-BOL_LEPAA_0802			CSCF-PAP-641840	0[n]				No				13-Aug-2009	Pyrgus carlinae				Natural History Museum of Neuchatel
LEPAA	LEPAA802-16	GBIFCH-BOL_LEPAA_0803		BOLD:ABZ4316	CSCF-PAP-629367	594[0n]	2			Yes				05-Aug-2009	Polyommatus daphnis				Natural History Museum of Neuchatel
LEPAA	LEPAA803-16	GBIFCH-BOL_LEPAA_0804			CSCF-PAP-632445	0[n]				No				16-Jul-2009	Pyrgus accreta				Natural History Museum of Neuchatel
LEPAA	LEPAA804-16	GBIFCH-BOL_LEPAA_0805			CSCF-PAP-1004153	0[n]				No				09-Jun-2000	Plebejus argyrognomon				Natural History Museum of Neuchatel
LEPAA	LEPAA805-16	GBIFCH-BOL_LEPAA_0806	31570		CSCF-PAP-780907	0[n]				No				01-Aug-2011	Pyrgus warrenensis				Natural History Museum of Neuchatel
LEPAA	LEPAA806-16	GBIFCH-BOL_LEPAA_0807	34742	BOLD:AAE2183	CSCF-PAP-775686	654[0n]	2			Yes				12-Jun-2011	Jordanita globulariae				Natural History Museum of Neuchatel
LEPAA	LEPAA807-16	GBIFCH-BOL_LEPAA_0808		BOLD:ABY6108	CSCF-PAP-697235	654[0n]	2			Yes				24-May-2010	Pyrgus carthami				Natural History Museum of Neuchatel
LEPAA	LEPAA808-16	GBIFCH-BOL_LEPAA_0809			CSCF-PAP-658387	0[n]				No				14-Jul-2009	Melitaea asteria				Natural History Museum of Neuchatel
LEPAA	LEPAA809-16	GBIFCH-BOL_LEPAA_0810			CSCF-PAP-393793	0[n]				No				25-Jun-1988	Phengaris alcon				Natural History Museum of Neuchatel
LEPAA	LEPAA810-16	GBIFCH-BOL_LEPAA_0811		BOLD:AAB4921	CSCF-PAP-1004097	654[0n]	2			Yes				18-May-2014	Aglais io				Natural History Museum of Neuchatel
LEPAA	LEPAA811-16	GBIFCH-BOL_LEPAA_0812			CSCF-PAP-1004133	0[n]				No				18-May-2014	Polyommatus icarus				Natural History Museum of Neuchatel
LEPAA	LEPAA812-16	GBIFCH-BOL_LEPAA_0813		BOLD:AAA7351	CSCF-PAP-1004071	654[0n]	2			Yes				18-May-2014	Coenonympha pamphilus				Natural History Museum of Neuchatel
LEPAA	LEPAA813-16	GBIFCH-BOL_LEPAA_0814			CSCF-PAP-1004074	0[n]				No				15-Jul-2014	Cupido argiades				Natural History Museum of Neuchatel
LEPAA	LEPAA814-16	GBIFCH-BOL_LEPAA_0815		BOLD:AAA4731	CSCF-PAP-1004065	576[0n]	1			No				06-Jul-2014	Aricia agestis				Natural History Museum of Neuchatel
LEPAA	LEPAA815-16	GBIFCH-BOL_LEPAA_0816		BOLD:AAA5867	CSCF-PAP-1004106	606[0n]	2			Yes				18-May-2014	Lycaena phlaeas				Natural History Museum of Neuchatel
LEPAA	LEPAA816-16	GBIFCH-BOL_LEPAA_0817		BOLD:AAA8638	CSCF-PAP-1004143	651[0n]	2			Yes				01-Jul-2014	Vanessa atalanta				Natural History Museum of Neuchatel
LEPAA	LEPAA817-16	GBIFCH-BOL_LEPAA_0818		BOLD:AAA8853	CSCF-PAP-1004098	654[0n]	2			Yes				18-Jul-2014	Lasiommata maera				Natural History Museum of Neuchatel
LEPAA	LEPAA818-16	GBIFCH-BOL_LEPAA_0819		BOLD:AAA9652	CSCF-PAP-1004061	654[0n]	2			Yes				21-May-2014	Aglais urticae				Natural History Museum of Neuchatel
LEPAA	LEPAA819-16	GBIFCH-BOL_LEPAA_0820		BOLD:AAB0123	CSCF-PAP-1004099	654[0n]	2			Yes				21-May-2014	Lasiommata megera				Natural History Museum of Neuchatel
LEPAA	LEPAA820-16	GBIFCH-BOL_LEPAA_0821		BOLD:AAA4515	CSCF-PAP-1004118	654[0n]	2			Yes				08-Jun-2014	Pararge aegeria				Natural History Museum of Neuchatel
LEPAA	LEPAA821-16	GBIFCH-BOL_LEPAA_0822		BOLD:AAC3112	CSCF-PAP-1004100	654[0n]	2			Yes				08-Jun-2014	Lasiommata petropolitana				Natural History Museum of Neuchatel
LEPAA	LEPAA822-16	GBIFCH-BOL_LEPAA_0823		BOLD:AAA5867	CSCF-PAP-1004107	567[0n]	2			No				06-Aug-2014	Lycaena phlaeas				Natural History Museum of Neuchatel
LEPAA	LEPAA823-16	GBIFCH-BOL_LEPAA_0824			CSCF-PAP-1004131	0[n]				No				08-Jun-2014	Lysandra bellargus				Natural History Museum of Neuchatel
LEPAA	LEPAA824-16	GBIFCH-BOL_LEPAA_0825		BOLD:AAA8264	CSCF-PAP-1004078	654[0n]	2			Yes				03-Jul-2014	Erebia ligea				Natural History Museum of Neuchatel
LEPAA	LEPAA825-16	GBIFCH-BOL_LEPAA_0826		BOLD:AAD7508	CSCF-PAP-1004144	654[0n]	2			Yes				06-Aug-2014	Zygaena lonicerae				Natural History Museum of Neuchatel
LEPAA	LEPAA826-16	GBIFCH-BOL_LEPAA_0827		BOLD:ABY7043	CSCF-PAP-1004127	654[0n]	2			Yes				22-Aug-2014	Polygonia c-album				Natural History Museum of Neuchatel
LEPAA	LEPAA827-16	GBIFCH-BOL_LEPAA_0828			CSCF-PAP-1004103	0[n]				No				03-Aug-2013	Leptidea sinapis				Natural History Museum of Neuchatel
LEPAA	LEPAA828-16	GBIFCH-BOL_LEPAA_0829		BOLD:AAC8100	CSCF-PAP-1004146	654[0n]	2			Yes				25-Jul-2014	Zygaena filipendulae				Natural History Museum of Neuchatel
LEPAA	LEPAA829-16	GBIFCH-BOL_LEPAA_0830			CSCF-PAP-1004121	0[n]				No				06-Jul-2014	Pieris bryoniae				Natural History Museum of Neuchatel
LEPAA	LEPAA830-16	GBIFCH-BOL_LEPAA_0831		BOLD:ABY7043	CSCF-PAP-1004128	654[0n]	2			Yes				15-Jul-2014	Polygonia c-album				Natural History Museum of Neuchatel
LEPAA	LEPAA831-16	GBIFCH-BOL_LEPAA_0832		BOLD:AAB1940	CSCF-PAP-1004062	654[0n]	2			Yes				01-Jul-2014	Aphantopus hyperantus				Natural History Museum of Neuchatel
LEPAA	LEPAA832-16	GBIFCH-BOL_LEPAA_0833		BOLD:AAC3112	CSCF-PAP-1004101	651[0n]	2			Yes				06-Jun-2014	Lasiommata petropolitana				Natural History Museum of Neuchatel
LEPAA	LEPAA833-16	GBIFCH-BOL_LEPAA_0834		BOLD:AAE6704	CSCF-PAP-1004151	654[0n]	2			No				18-Jul-2014	Zygaena purpuralis				Natural History Museum of Neuchatel
LEPAA	LEPAA834-16	GBIFCH-BOL_LEPAA_0835		BOLD:AAA8264	CSCF-PAP-1004079	654[0n]	2			Yes				06-Jul-2014	Erebia ligea				Natural History Museum of Neuchatel
LEPAA	LEPAA835-16	GBIFCH-BOL_LEPAA_0836		BOLD:AAB2322	CSCF-PAP-1004064	654[0n]	2			Yes				06-Jul-2014	Speyeria agalaja				Natural History Museum of Neuchatel
LEPAA	LEPAA836-16	GBIFCH-BOL_LEPAA_0837			CSCF-PAP-1004108	0[n]				No				08-Jun-2014	Lycaena tityrus				Natural History Museum of Neuchatel
LEPAA	LEPAA837-16	GBIFCH-BOL_LEPAA_0838		BOLD:AAA5531	CSCF-PAP-1004072	573[0n]	2			Yes				17-Jul-2014	Colias hyale				Natural History Museum of Neuchatel
LEPAA	LEPAA838-16	GBIFCH-BOL_LEPAA_0839		BOLD:AAC5456	CSCF-PAP-1004081	645[0n]	2			Yes				06-Jun-2014	Erebia meolans				Natural History Museum of Neuchatel
LEPAA	LEPAA839-16	GBIFCH-BOL_LEPAA_0840		BOLD:AAB3455	CSCF-PAP-1004075	654[0n]	2			Yes				06-Aug-2014	Erebia aethiops				Natural History Museum of Neuchatel
LEPAA	LEPAA840-16	GBIFCH-BOL_LEPAA_0841		BOLD:ACE4157	CSCF-PAP-1004113	627[0n]	2			Yes				25-May-2014	Melitaea cinxia				Natural History Museum of Neuchatel
LEPAA	LEPAA841-16	GBIFCH-BOL_LEPAA_0842		BOLD:AAB8731	CSCF-PAP-1004094	654[0n]	2			No				19-May-2014	Hamearis lucina				Natural History Museum of Neuchatel
LEPAA	LEPAA842-16	GBIFCH-BOL_LEPAA_0843		BOLD:AAB1728	CSCF-PAP-1004109	654[0n]	2			Yes				19-May-2014	Lycaena tityrus tityrus				Natural History Museum of Neuchatel
LEPAA	LEPAA843-16	GBIFCH-BOL_LEPAA_0844		BOLD:AAD7508	CSCF-PAP-1004149	654[0n]	2			Yes				18-Jul-2014	Zygaena lonicerae				Natural History Museum of Neuchatel
LEPAA	LEPAA844-16	GBIFCH-BOL_LEPAA_0845		BOLD:ADL8106	CSCF-PAP-1004152	654[0n]	2			Yes				06-Aug-2014	Zygaena transalpina				Natural History Museum of Neuchatel
LEPAA	LEPAA845-16	GBIFCH-BOL_LEPAA_0846			CSCF-PAP-1004066	0[n]				No				16-Jul-2014	Aricia nicias				Natural History Museum of Neuchatel
LEPAA	LEPAA846-16	GBIFCH-BOL_LEPAA_0847		BOLD:AAB8035	CSCF-PAP-1004093	654[0n]	2			Yes				16-Jul-2014	Euphydryas intermedia				Natural History Museum of Neuchatel
LEPAA	LEPAA847-16	GBIFCH-BOL_LEPAA_0848		BOLD:AAA6298	CSCF-PAP-1004102	654[0n]	2			Yes				18-Jul-2014	Leptidea sinapis				Natural History Museum of Neuchatel
LEPAA	LEPAA848-16	GBIFCH-BOL_LEPAA_0849		BOLD:AAF0158	CSCF-PAP-1004083	654[0n]	2			Yes				06-Aug-2014	Erebia mnestra				Natural History Museum of Neuchatel
LEPAA	LEPAA849-16	GBIFCH-BOL_LEPAA_0850		BOLD:ABY4319	CSCF-PAP-1004141	654[0n]	2			Yes				08-Aug-2014	Satyrium w-album				Natural History Museum of Neuchatel
LEPAA	LEPAA850-16	GBIFCH-BOL_LEPAA_0851		BOLD:AAD5110	CSCF-PAP-1004058	594[0n]	2			Yes				16-Jul-2014	Adscita alpina				Natural History Museum of Neuchatel
LEPAA	LEPAA851-16	GBIFCH-BOL_LEPAA_0852			CSCF-PAP-1004142	0[n]				No				08-Aug-2014	Spialia sertorius				Natural History Museum of Neuchatel
LEPAA	LEPAA852-16	GBIFCH-BOL_LEPAA_0853		BOLD:AAD7508	CSCF-PAP-1004148	654[0n]	2			Yes				15-Jul-2014	Zygaena lonicerae				Natural History Museum of Neuchatel
LEPAA	LEPAA853-16	GBIFCH-BOL_LEPAA_0854		BOLD:AAA3447	CSCF-PAP-1004073	654[0n]	2			Yes				16-Jul-2014	Colias palaeno				Natural History Museum of Neuchatel
LEPAA	LEPAA854-16	GBIFCH-BOL_LEPAA_0855		BOLD:AAA3343	CSCF-PAP-1004119	654[0n]	2			Yes				07-Jun-2014	Parnassius mnemosyne				Natural History Museum of Neuchatel
LEPAA	LEPAA855-16	GBIFCH-BOL_LEPAA_0856		BOLD:AAA7166	CSCF-PAP-1004117	654[0n]	2			Yes				07-Jun-2014	Nymphalis antiopa				Natural History Museum of Neuchatel
LEPAA	LEPAA856-16	GBIFCH-BOL_LEPAA_0857		BOLD:AAC1068	CSCF-PAP-1004105	654[0n]	2			Yes				30-Jun-2014	Lopinga achine				Natural History Museum of Neuchatel
LEPAA	LEPAA857-16	GBIFCH-BOL_LEPAA_0858		BOLD:AAF0158	CSCF-PAP-1004082	654[0n]	2			Yes				27-Jul-2014	Erebia mnestra				Natural History Museum of Neuchatel
LEPAA	LEPAA858-16	GBIFCH-BOL_LEPAA_0859		BOLD:AAB3509	CSCF-PAP-1004116	576[0n]	2			Yes				18-Jul-2014	Nymphalis polychloros				Natural History Museum of Neuchatel
LEPAA	LEPAA859-16	GBIFCH-BOL_LEPAA_0860		BOLD:ABZ4903	CSCF-PAP-1004132	573[0n]	2			Yes					Polyommatus escheri				Natural History Museum of Neuchatel	collection time 2014
LEPAA	LEPAA860-16	GBIFCH-BOL_LEPAA_0861		BOLD:AAF0740	CSCF-PAP-1004089	585[0n]	2			No				01-Jun-2014	Euchloe simplonia				Natural History Museum of Neuchatel
LEPAA	LEPAA861-16	GBIFCH-BOL_LEPAA_0862			CSCF-PAP-1004077	0[n]				No				03-Jul-2014	Erebia euryale				Natural History Museum of Neuchatel
LEPAA	LEPAA862-16	GBIFCH-BOL_LEPAA_0863			CSCF-PAP-1004140	0[n]				No				17-Jul-2014	Satyrium w-album				Natural History Museum of Neuchatel
LEPAA	LEPAA863-16	GBIFCH-BOL_LEPAA_0864		BOLD:AAB2322	CSCF-PAP-1004063	654[0n]	2			Yes				01-Jul-2014	Speyeria agalaja				Natural History Museum of Neuchatel
LEPAA	LEPAA864-16	GBIFCH-BOL_LEPAA_0865			CSCF-PAP-1004112	477[0n]	2			No				01-Jul-2014	Phengaris arion				Natural History Museum of Neuchatel
LEPAA	LEPAA865-16	GBIFCH-BOL_LEPAA_0866			CSCF-PAP-1004123	0[n]				No				22-May-2014	Pieris bryoniae				Natural History Museum of Neuchatel
LEPAA	LEPAA866-16	GBIFCH-BOL_LEPAA_0867		BOLD:ABA8687	CSCF-PAP-1004076	627[0n]	2			Yes				17-Jul-2014	Erebia alberganus				Natural History Museum of Neuchatel
LEPAA	LEPAA867-16	GBIFCH-BOL_LEPAA_0868		BOLD:ABX6143	CSCF-PAP-1004130	654[0n]	2			Yes				17-Jul-2014	Polyommatus amandus				Natural History Museum of Neuchatel
LEPAA	LEPAA868-16	GBIFCH-BOL_LEPAA_0869		BOLD:AAA2226	CSCF-PAP-1004122	654[0n]	2			Yes				03-Jun-2014	Pieris bryoniae				Natural History Museum of Neuchatel
LEPAA	LEPAA869-16	GBIFCH-BOL_LEPAA_0870		BOLD:ACE9283	CSCF-PAP-1004138	654[0n]	2			Yes				03-Jul-2014	Pyrgus cacaliae				Natural History Museum of Neuchatel
LEPAA	LEPAA870-16	GBIFCH-BOL_LEPAA_0871		BOLD:ABZ5868	CSCF-PAP-1004068	654[0n]	2			Yes				17-Jul-2014	Boloria thore				Natural History Museum of Neuchatel
LEPAA	LEPAA871-16	GBIFCH-BOL_LEPAA_0872		BOLD:AAF0740	CSCF-PAP-1004090	654[0n]	2			Yes				15-Jul-2014	Euchloe simplonia				Natural History Museum of Neuchatel
LEPAA	LEPAA872-16	GBIFCH-BOL_LEPAA_0873		BOLD:ACF8911	CSCF-PAP-1004114	654[0n]	2			Yes				09-Jun-2014	Melitaea deione				Natural History Museum of Neuchatel
LEPAA	LEPAA873-16	GBIFCH-BOL_LEPAA_0874		BOLD:AAD5110	CSCF-PAP-1004060	636[0n]	2			Yes				16-Jul-2014	Adscita statices				Natural History Museum of Neuchatel
LEPAA	LEPAA874-16	GBIFCH-BOL_LEPAA_0875		BOLD:ABY8877	CSCF-PAP-1004059	654[0n]	2			Yes				16-Jul-2014	Adscita dujardini				Natural History Museum of Neuchatel
LEPAA	LEPAA875-16	GBIFCH-BOL_LEPAA_0876		BOLD:AAC2719	CSCF-PAP-1004070	654[0n]	2			Yes				16-Jul-2014	Carcharodus lavatherae				Natural History Museum of Neuchatel
LEPAA	LEPAA876-16	GBIFCH-BOL_LEPAA_0877		BOLD:AAC5456	CSCF-PAP-1004080	654[0n]	2			Yes				15-Jul-2014	Erebia meolans				Natural History Museum of Neuchatel
LEPAA	LEPAA877-16	GBIFCH-BOL_LEPAA_0878		BOLD:AAJ0031	CSCF-PAP-1004091	630[0n]	2			Yes				04-Aug-2014	Euphydryas cynthia				Natural History Museum of Neuchatel
LEPAA	LEPAA878-16	GBIFCH-BOL_LEPAA_0879		BOLD:ACF7581	CSCF-PAP-1004085	654[0n]	2			Yes				03-Sep-2014	Erebia montana				Natural History Museum of Neuchatel
LEPAA	LEPAA879-16	GBIFCH-BOL_LEPAA_0880		BOLD:ABY6108	CSCF-PAP-1004139	654[0n]	2			Yes				09-Jun-2014	Pyrgus carthami				Natural History Museum of Neuchatel
LEPAA	LEPAA880-16	GBIFCH-BOL_LEPAA_0881		BOLD:AAD6229	CSCF-PAP-1004095	654[0n]	2			Yes				15-Jul-2014	Heteropterus morpheus				Natural History Museum of Neuchatel
LEPAA	LEPAA881-16	GBIFCH-BOL_LEPAA_0882		BOLD:ACE5088	CSCF-PAP-1004136	618[0n]	2			Yes				06-Aug-2014	Pyrgus armoricanus				Natural History Museum of Neuchatel
LEPAA	LEPAA882-16	GBIFCH-BOL_LEPAA_0883		BOLD:ABZ5868	CSCF-PAP-1004067	654[0n]	2			Yes				06-Jul-2014	Boloria thore				Natural History Museum of Neuchatel
LEPAA	LEPAA883-16	GBIFCH-BOL_LEPAA_0884		BOLD:AAB5172	CSCF-PAP-1004124	582[0n]	2			Yes				06-Aug-2014	Agriades optilete				Natural History Museum of Neuchatel
LEPAA	LEPAA884-16	GBIFCH-BOL_LEPAA_0885		BOLD:AAB3454	CSCF-PAP-1004086	585[0n]	2			Yes				17-Jul-2014	Erebia pandrose				Natural History Museum of Neuchatel
LEPAA	LEPAA885-16	GBIFCH-BOL_LEPAA_0886		BOLD:AAA7370	CSCF-PAP-1004115	654[0n]	2			No				03-Aug-2014	Melitaea phoebe				Natural History Museum of Neuchatel
LEPAA	LEPAA886-16	GBIFCH-BOL_LEPAA_0887		BOLD:ACF7581	CSCF-PAP-1004084	591[0n]	2			Yes				03-Aug-2014	Erebia montana				Natural History Museum of Neuchatel
LEPAA	LEPAA887-16	GBIFCH-BOL_LEPAA_0888		BOLD:AAC9448	CSCF-PAP-1004134	582[0n]	2			No				31-Jul-2014	Pontia callidice				Natural History Museum of Neuchatel
LEPAA	LEPAA888-16	GBIFCH-BOL_LEPAA_0889		BOLD:AAE5039	CSCF-PAP-1004126	654[0n]	2			Yes				16-Jul-2014	Agriades orbitulus				Natural History Museum of Neuchatel
LEPAA	LEPAA889-16	GBIFCH-BOL_LEPAA_0890			CSCF-PAP-1004110	0[n]				No				06-Aug-2014	Lycaena virgaureae				Natural History Museum of Neuchatel
LEPAA	LEPAA890-16	GBIFCH-BOL_LEPAA_0891		BOLD:AAJ9881	CSCF-PAP-1004147	654[0n]	2			Yes				05-Aug-2014	Zygaena fausta				Natural History Museum of Neuchatel
LEPAA	LEPAA891-16	GBIFCH-BOL_LEPAA_0892		BOLD:AAJ9881	CSCF-PAP-1004145	549[0n]	2			Yes				03-Aug-2014	Zygaena fausta				Natural History Museum of Neuchatel
LEPAA	LEPAA892-16	GBIFCH-BOL_LEPAA_0893		BOLD:AAL0274	CSCF-PAP-1004088	585[0n]	2			No				17-Jul-2014	Erebia eriphyle				Natural History Museum of Neuchatel
LEPAA	LEPAA893-16	GBIFCH-BOL_LEPAA_0894		BOLD:AAE5039	CSCF-PAP-1004125	576[0n]	2			Yes				01-Aug-2014	Agriades orbitulus				Natural History Museum of Neuchatel
LEPAA	LEPAA894-16	GBIFCH-BOL_LEPAA_0895		BOLD:AAB8035	CSCF-PAP-1004092	654[0n]	2			Yes				03-Jul-2014	Euphydryas intermedia				Natural History Museum of Neuchatel
LEPAA	LEPAA895-16	GBIFCH-BOL_LEPAA_0896		BOLD:AAB0370	CSCF-PAP-1004120	606[0n]	2			Yes				31-Jul-2014	Parnassius sacerdos				Natural History Museum of Neuchatel
LEPAA	LEPAA896-16	GBIFCH-BOL_LEPAA_0897		BOLD:AAB3187	CSCF-PAP-970596	585[0n]	2			Yes				24-Jul-2012	Satyrium spini				Natural History Museum of Neuchatel
LEPAA	LEPAA897-16	GBIFCH-BOL_LEPAA_0898		BOLD:AAV7085	CSCF-PAP-1016355	603[0n]	2			Yes				22-Jul-2015	Erebia styx				Natural History Museum of Neuchatel
LEPAA	LEPAA898-16	GBIFCH-BOL_LEPAA_0899		BOLD:AAA3563	CSCF-PAP-1017013	579[0n]	2			Yes				21-Jul-2015	Coenonympha tullia				Natural History Museum of Neuchatel
LEPAA	LEPAA899-16	GBIFCH-BOL_LEPAA_0900		BOLD:AAA3563	CSCF-PAP-1017012	654[0n]	2			Yes				21-Jul-2015	Coenonympha tullia				Natural History Museum of Neuchatel
LEPAA	LEPAA900-16	GBIFCH-BOL_LEPAA_0901		BOLD:AAA3563	CSCF-PAP-1066869	591[0n]	2			Yes				17-Jul-2015	Coenonympha tullia				Natural History Museum of Neuchatel
LEPAA	LEPAA901-16	GBIFCH-BOL_LEPAA_0902		BOLD:AAA3563	CSCF-PAP-1017339	585[0n]	2			Yes				17-Jul-2015	Coenonympha tullia				Natural History Museum of Neuchatel
LEPAA	LEPAA902-16	GBIFCH-BOL_LEPAA_0903		BOLD:AAA3563	CSCF-PAP-1017014	564[0n]	2			Yes				12-Jun-2015	Coenonympha tullia				Natural History Museum of Neuchatel
LEPAA	LEPAA903-16	GBIFCH-BOL_LEPAA_0904			CSCF-PAP-1017015	0[n]				No				12-Jun-2015	Coenonympha tullia				Natural History Museum of Neuchatel
LEPAA	LEPAA904-16	GBIFCH-BOL_LEPAA_0905		BOLD:ABZ6967	CSCF-PAP-1017010	651[0n]	2			No				22-Jul-2015	Pyrgus warrenensis				Natural History Museum of Neuchatel
LEPAA	LEPAA905-16	GBIFCH-BOL_LEPAA_0906		BOLD:AAA3563	CSCF-PAP-1016306	588[0n]	2			Yes				30-Jun-2015	Coenonympha tullia				Centre Suisse de Cartographie de la Faune
LEPAA	LEPAA906-16	GBIFCH-BOL_LEPAA_0907		BOLD:ACE9283	CSCF-PAP-1017011	594[0n]	2			Yes				08-Jul-2015	Pyrgus andromedae				Natural History Museum of Neuchatel
LEPAA	LEPPA1212-17	GBIFCH-BOL_LEPAA_0944		BOLD:AAA7584	CSCF-PAP-917034	654[0n]	2			Yes				05-Jul-2013	Melitaea nevadensis	adult			Natural History Museum of Neuchatel
LEPAA	LEPPA1213-17	GBIFCH-BOL_LEPAA_0945		BOLD:AAA7584	CSCF-PAP-759598	654[0n]	2			Yes				22-Jul-2010	Melitaea nevadensis	adult			Natural History Museum of Neuchatel
LEPAA	LEPPA1214-17	GBIFCH-BOL_LEPAA_0946			CSCF-PAP-754757	0[n]				No				24-Jun-2010	Melitaea nevadensis	adult			Natural History Museum of Neuchatel
LEPAA	LEPPA1215-17	GBIFCH-BOL_LEPAA_0947		BOLD:AAA7584	CSCF-PAP-1043685	612[0n]	1			No				03-Jul-2014	Melitaea nevadensis	adult			Natural History Museum of Neuchatel
LEPAA	LEPPA1216-17	GBIFCH-BOL_LEPAA_0948		BOLD:AAA7584	CSCF-PAP-912989	620[0n]	2			Yes				20-Jul-2013	Melitaea nevadensis				Natural History Museum of Neuchatel
LEPAA	LEPPA1217-17	GBIFCH-BOL_LEPAA_0949			CSCF-PAP-1054043	0[n]				No				06-Jul-2014	Melitaea athalia	adult			Natural History Museum of Neuchatel
LEPAA	LEPPA1218-17	GBIFCH-BOL_LEPAA_0950			CSCF-PAP-1044858	0[n]				No				03-Jul-2014	Melitaea nevadensis	adult			Natural History Museum of Neuchatel
LEPAA	LEPPA1219-17	GBIFCH-BOL_LEPAA_0951			CSCF-PAP-1046736	0[n]				No				10-Jun-2014	Melitaea nevadensis	adult			Natural History Museum of Neuchatel
LEPAA	LEPPA1220-17	GBIFCH-BOL_LEPAA_0952			CSCF-PAP-962010	0[n]				No				22-Aug-2014	Aricia agestis	adult			Natural History Museum of Neuchatel
LEPAA	LEPPA1221-17	GBIFCH-BOL_LEPAA_0953		BOLD:AAA4731	CSCF-PAP-1282624	626[0n]	2			Yes				05-Jun-2014	Aricia agestis	adult			Natural History Museum of Neuchatel
LEPAA	LEPPA1222-17	GBIFCH-BOL_LEPAA_0954		BOLD:ACE7893	CSCF-PAP-1232977	615[0n]	2			Yes				04-Jul-2015	Aricia artaxerxes	adult			Natural History Museum of Neuchatel
LEPAA	LEPPA1223-17	GBIFCH-BOL_LEPAA_0955		BOLD:ACE7893	CSCF-PAP-1205660	654[0n]	2			Yes				03-Aug-2015	Aricia artaxerxes	adult			Natural History Museum of Neuchatel
LEPAA	LEPPA1224-17	GBIFCH-BOL_LEPAA_0956			CSCF-PAP-975985	0[n]				No				20-Jul-2009	Aricia agestis	adult			Natural History Museum of Neuchatel
LEPAA	LEPPA1225-17	GBIFCH-BOL_LEPAA_0957		BOLD:AAB1728	CSCF-PAP-1021693	654[0n]	2			Yes				16-Jul-2014	Lycaena tityrus tityrus	adult			Natural History Museum of Neuchatel
LEPAA	LEPPA1226-17	GBIFCH-BOL_LEPAA_0958		BOLD:ACE7893	CSCF-PAP-912692	619[0n]	2			Yes				01-Sep-2013	Aricia artaxerxes				Natural History Museum of Neuchatel
LEPAA	LEPPA1227-17	GBIFCH-BOL_LEPAA_0959			CSCF-PAP-912697	0[n]				No				06-Jul-2013	Aricia artaxerxes				Natural History Museum of Neuchatel
LEPAA	LEPPA1228-17	GBIFCH-BOL_LEPAA_0960			CSCF-PAP-1059717	0[n]				No				17-Jul-2014	Lycaena tityrus	adult			Natural History Museum of Neuchatel
LEPAA	LEPPA1229-17	GBIFCH-BOL_LEPAA_0961		BOLD:AAB1728	CSCF-PAP-1027514	602[0n]	2			Yes				05-May-2014	Lycaena tityrus tityrus	adult			Natural History Museum of Neuchatel
LEPAA	LEPPA1230-17	GBIFCH-BOL_LEPAA_0962		BOLD:AAB1728	CSCF-PAP-1282628	654[0n]	2			Yes				18-Jul-2014	Lycaena tityrus subalpina	adult			Natural History Museum of Neuchatel
LEPAA	LEPPA1232-17	GBIFCH-BOL_LEPAA_0964		BOLD:AAB1728	CSCF-PAP-1235436	618[0n]	2			Yes				04-Jul-2015	Lycaena tityrus subalpina	adult			Natural History Museum of Neuchatel
LEPAA	LEPPA1233-17	GBIFCH-BOL_LEPAA_0965		BOLD:AAA6759	CSCF-PAP-1027655	438[0n]	2			No				15-Jul-2014	Thymelicus lineola	adult			Natural History Museum of Neuchatel
LEPAA	LEPPA1234-17	GBIFCH-BOL_LEPAA_0966		BOLD:AAA6760	CSCF-PAP-913183	654[0n]	2			Yes				15-Jul-2013	Thymelicus lineola				Natural History Museum of Neuchatel
LEPAA	LEPPA1235-17	GBIFCH-BOL_LEPAA_0967		BOLD:AAA6759	CSCF-PAP-1064173	654[0n]	2			Yes				06-Jul-2014	Thymelicus lineola	adult			Natural History Museum of Neuchatel
LEPAA	LEPPA1236-17	GBIFCH-BOL_LEPAA_0968			CSCF-PAP-931159	0[n]				No				15-Aug-2013	Thymelicus lineola	adult			Natural History Museum of Neuchatel
LEPAA	LEPPA1237-17	GBIFCH-BOL_LEPAA_0969		BOLD:ACT5602	CSCF-PAP-1060508	654[0n]	2			Yes				16-Jul-2014	Thymelicus sylvestris	adult			Natural History Museum of Neuchatel
LEPAA	LEPPA1238-17	GBIFCH-BOL_LEPAA_0970			CSCF-PAP-913190	0[n]				No				08-Jul-2013	Thymelicus sylvestris				Natural History Museum of Neuchatel
LEPAA	LEPPA1239-17	GBIFCH-BOL_LEPAA_0971			CSCF-PAP-755527	0[n]				No				19-Jul-2010	Thymelicus sylvestris	adult			Natural History Museum of Neuchatel
LEPAA	LEPPA1240-17	GBIFCH-BOL_LEPAA_0972			CSCF-PAP-1058848	0[n]				No				06-Jul-2014	Thymelicus sylvestris	adult			Natural History Museum of Neuchatel
LEPAA	LEPPA1241-17	GBIFCH-BOL_LEPAA_0974	218717		CSCF-PAP-1199315	0[n]				No				28-May-2016	Lycaena helle	adult			Natural History Museum of Neuchatel
LEPAA	LEPPA1242-17	GBIFCH-BOL_LEPAA_0975		BOLD:AAB5175	CSCF-PAP-1044618	654[0n]	2			Yes				24-May-2014	Lycaena helle	adult			Natural History Museum of Neuchatel
LEPAA	LEPPA1243-17	GBIFCH-BOL_LEPAA_0976			CSCF-PAP-962177	0[n]				No				16-Jun-2014	Coenonympha glycerion	adult			Natural History Museum of Neuchatel
LEPAA	LEPPA1244-17	GBIFCH-BOL_LEPAA_0977			CSCF-PAP-1026138	0[n]				No				07-Jun-2014	Leptidea sinapis	adult			Natural History Museum of Neuchatel
LEPAA	LEPPA1245-17	GBIFCH-BOL_LEPAA_0978			CSCF-PAP-1282627	0[n]				No				17-Jul-2015	Leptidea juvernica	adult			Natural History Museum of Neuchatel
LEPAA	LEPPA1246-17	GBIFCH-BOL_LEPAA_0979		BOLD:ABY4319	CSCF-PAP-1059335	515[0n]	3			Yes				01-Jul-2014	Satyrium w-album	adult			Natural History Museum of Neuchatel
LEPAA	LEPPA1247-17	GBIFCH-BOL_LEPAA_0980		BOLD:ABY4319	CSCF-PAP-1055139	608[0n]	2			Yes				06-Aug-2014	Satyrium w-album	adult			Natural History Museum of Neuchatel
LEPAA	LEPPA1248-17	GBIFCH-BOL_LEPAA_0981		BOLD:ABY4319	CSCF-PAP-954504	654[0n]	2			Yes				12-Aug-2013	Satyrium w-album	adult			Natural History Museum of Neuchatel
LEPAA	LEPPA1249-17	GBIFCH-BOL_LEPAA_0982		BOLD:ABY4319	CSCF-PAP-1211595	622[0n]	1			No				15-Jul-2015	Satyrium w-album	adult			Natural History Museum of Neuchatel
LEPAA	LEPPA1250-17	GBIFCH-BOL_LEPAA_0983		BOLD:AAB0370	CSCF-PAP-1029761	654[0n]	2			Yes				18-Aug-2014	Parnassius sacerdos	adult			Natural History Museum of Neuchatel
LEPAA	LEPPA1251-17	GBIFCH-BOL_LEPAA_0984		BOLD:AAB7905	CSCF-PAP-1233817	623[0n]	2			Yes				14-Jul-2015	Apatura iris	adult			Natural History Museum of Neuchatel
LEPAA	LEPPA1252-17	GBIFCH-BOL_LEPAA_0985		BOLD:AAB5250	CSCF-PAP-893613	654[0n]	2			Yes				05-Jul-2013	Libythea celtis	adult			Natural History Museum of Neuchatel
LEPAA	LEPPA1253-17	GBIFCH-BOL_LEPAA_0986		BOLD:AAA7508	CSCF-PAP-1282626	654[0n]	2			Yes				03-Jul-2015	Euphydryas aurinia glaciegenita	adult			Natural History Museum of Neuchatel
LEPAA	LEPPA1254-17	GBIFCH-BOL_LEPAA_0987			CSCF-PAP-1282629	0[n]				No				30-Jul-2015	Phengaris alcon	adult			Natural History Museum of Neuchatel
LEPAA	LEPPA1255-17	GBIFCH-BOL_LEPAA_0988		BOLD:AAB3004	CSCF-PAP-1125922	645[0n]	2			Yes				21-Jul-2016	Cupido osiris	adult			Natural History Museum of Neuchatel
LEPAA	LEPPA1256-17	GBIFCH-BOL_LEPAA_0989		BOLD:ABZ6967	CSCF-PAP-1201874	654[0n]	2			Yes				19-Jul-2016	Pyrgus alveus				Natural History Museum of Neuchatel
LEPAA	LEPPA1258-17	GBIFCH-BOL_LEPAA_0991		BOLD:AAE5039	CSCF-PAP-1125786	620[0n]	1			No				03-Aug-2016	Agriades orbitulus	adult			Natural History Museum of Neuchatel
LEPAA	LEPPA1259-17	GBIFCH-BOL_LEPAA_0992		BOLD:ABZ6967	CSCF-PAP-1201872	648[0n]	2			Yes				18-Jul-2016	Pyrgus warrenensis				Natural History Museum of Neuchatel
LEPAA	LEPPA1260-17	GBIFCH-BOL_LEPAA_0993		BOLD:AAB3453	CSCF-PAP-1125973	638[0n]	2			Yes				07-Aug-2016	Erebia tyndarus	adult			Natural History Museum of Neuchatel
LEPAA	LEPPA1261-17	GBIFCH-BOL_LEPAA_0994		BOLD:AAC5377	CSCF-PAP-1125966	654[0n]	2			Yes				07-Aug-2016	Erebia sudetica	adult			Natural History Museum of Neuchatel
LEPAA	LEPPA1262-17	GBIFCH-BOL_LEPAA_0995		BOLD:ACE7893	CSCF-PAP-1125824	619[0n]	2			Yes				07-Aug-2016	Aricia artaxerxes	adult			Natural History Museum of Neuchatel
LEPAA	LEPPA1263-17	GBIFCH-BOL_LEPAA_0996		BOLD:AAA2225	CSCF-PAP-1126211	632[0n]	2			Yes				17-Aug-2016	Pontia edusa	adult			Natural History Museum of Neuchatel
LEPAA	LEPPA1264-17	GBIFCH-BOL_LEPAA_0997		BOLD:AAB6141	CSCF-PAP-1201873	622[0n]	2			Yes				21-Jul-2016	Pyrgus malvoides				Natural History Museum of Neuchatel
LEPAA	LEPPA1265-17	GBIFCH-BOL_LEPAA_0998			CSCF-PAP-1125877	0[n]				No				03-Aug-2016	Coenonympha gardetta	adult			Natural History Museum of Neuchatel
LEPAA	LEPPA1266-17	GBIFCH-BOL_LEPAA_0999		BOLD:AAB1120	CSCF-PAP-1201875	654[0n]	2			Yes				03-Aug-2016	Coenonympha gardetta	adult			Natural History Museum of Neuchatel
LEPAA	LEPPA1267-17	GBIFCH-BOL_LEPAA_1000		BOLD:AAB1120	CSCF-PAP-1201876	622[0n]	2			Yes				03-Aug-2016	Coenonympha gardetta	adult			Natural History Museum of Neuchatel
LEPAA	LEPPA1268-17	GBIFCH-BOL_LEPAA_1001		BOLD:ACE9283	CSCF-PAP-1126222	654[0n]	2			Yes				01-Jul-2016	Pyrgus andromedae	adult			Natural History Museum of Neuchatel
LEPAA	LEPPA1269-17	GBIFCH-BOL_LEPAA_1002			CSCF-PAP-692708	0[n]				No				20-Jul-2010	Adscita statices x alpina	adult			Natural History Museum of Neuchatel
LEPAA	LEPPA1270-17	GBIFCH-BOL_LEPAA_1003			CSCF-PAP-692705	0[n]				No				20-Jul-2010	Adscita statices x alpina	adult			Natural History Museum of Neuchatel
LEPAA	LEPPA1271-17	GBIFCH-BOL_LEPAA_1004		BOLD:AAD5110	CSCF-PAP-1125771	634[0n]	2			Yes				24-Jun-2016	Adscita statices	adult			Natural History Museum of Neuchatel
LEPAA	LEPPA1272-17	GBIFCH-BOL_LEPAA_1005		BOLD:AAE6704	CSCF-PAP-1126278	654[0n]	2			Yes				22-Aug-2016	Zygaena purpuralis				Natural History Museum of Neuchatel
LEPAA	LEPPA1273-17	GBIFCH-BOL_LEPAA_1006		BOLD:AAX8625	CSCF-PAP-1126279	624[0n]	2			Yes				08-Jul-2016	Erebia flavofasciata	adult			Natural History Museum of Neuchatel
LEPAA	LEPPA1176-17	GBIFCH-BOL_LEPAA_0908		BOLD:AAA8264	CSCF-PAP-1040833	564[0n]	2			Yes				25-Jul-2014	Erebia ligea	adult			Natural History Museum of Neuchatel
LEPAA	LEPPA1177-17	GBIFCH-BOL_LEPAA_0909		BOLD:AAA8264	CSCF-PAP-1037507	455[0n]	2			No				06-Jul-2014	Erebia ligea	adult			Natural History Museum of Neuchatel
LEPAA	LEPPA1178-17	GBIFCH-BOL_LEPAA_0910			CSCF-PAP-755941	0[n]				No				13-Jul-2010	Zygaena lonicerae	adult			Natural History Museum of Neuchatel
LEPAA	LEPPA1179-17	GBIFCH-BOL_LEPAA_0911			CSCF-PAP-1027299	0[n]				No				16-Jul-2014	Pyronia tithonus	adult			Natural History Museum of Neuchatel
LEPAA	LEPPA1180-17	GBIFCH-BOL_LEPAA_0912			CSCF-PAP-963133	0[n]				No				05-Aug-2014	Pyronia tithonus	adult			Natural History Museum of Neuchatel
LEPAA	LEPPA1181-17	GBIFCH-BOL_LEPAA_0913		BOLD:AAA3848	CSCF-PAP-1223004	580[0n]	2			Yes				14-Jul-2015	Lampides boeticus	adult			Natural History Museum of Neuchatel
LEPAA	LEPPA1182-17	GBIFCH-BOL_LEPAA_0914		BOLD:AAB1120	CSCF-PAP-1222623	563[0n]	2			Yes				01-Jul-2015	Coenonympha darwiniana	adult			Natural History Museum of Neuchatel
LEPAA	LEPPA1183-17	GBIFCH-BOL_LEPAA_0915			CSCF-PAP-912737	0[n]				No				05-Jul-2013	Coenonympha darwiniana				Natural History Museum of Neuchatel
LEPAA	LEPPA1184-17	GBIFCH-BOL_LEPAA_0916		BOLD:AAA8264	CSCF-PAP-1024630	654[0n]	2			Yes				06-Sep-2014	Erebia euryale	adult			Natural History Museum of Neuchatel
LEPAA	LEPPA1185-17	GBIFCH-BOL_LEPAA_0917			CSCF-PAP-912815	0[n]				No				15-Jul-2013	Erebia euryale				Natural History Museum of Neuchatel
LEPAA	LEPPA1186-17	GBIFCH-BOL_LEPAA_0918			CSCF-PAP-1056603		2			No				22-Aug-2014	Erebia manto	adult			Natural History Museum of Neuchatel
LEPAA	LEPPA1187-17	GBIFCH-BOL_LEPAA_0919			CSCF-PAP-912832	0[n]				No				31-Jul-2013	Erebia manto				Natural History Museum of Neuchatel
LEPAA	LEPPA1188-17	GBIFCH-BOL_LEPAA_0920			CSCF-PAP-1215185	0[n]				No				17-Jul-2015	Erebia manto	adult			Natural History Museum of Neuchatel
LEPAA	LEPPA1189-17	GBIFCH-BOL_LEPAA_0921			CSCF-PAP-1039737	0[n]				No				21-Jun-2014	Coenonympha gardetta	adult			Natural History Museum of Neuchatel
LEPAA	LEPPA1190-17	GBIFCH-BOL_LEPAA_0922		BOLD:AAB5306	CSCF-PAP-1028303	579[0n]	2			Yes				05-May-2014	Scolitantides orion	adult			Natural History Museum of Neuchatel
LEPAA	LEPPA1191-17	GBIFCH-BOL_LEPAA_0923			CSCF-PAP-912766	0[n]				No				14-Jul-2013	Coenonympha gardetta				Natural History Museum of Neuchatel
LEPAA	LEPPA1192-17	GBIFCH-BOL_LEPAA_0924		BOLD:AAB1120	CSCF-PAP-912762	614[0n]	2			Yes				12-Jul-2013	Coenonympha gardetta				Natural History Museum of Neuchatel
LEPAA	LEPPA1193-17	GBIFCH-BOL_LEPAA_0925		BOLD:AAB1120	CSCF-PAP-1282625	623[0n]	2			Yes				25-Jul-2014	Coenonympha gardetta	adult			Natural History Museum of Neuchatel
LEPAA	LEPPA1194-17	GBIFCH-BOL_LEPAA_0926			CSCF-PAP-912759	0[n]				No				15-Jul-2013	Coenonympha gardetta				Natural History Museum of Neuchatel
LEPAA	LEPPA1195-17	GBIFCH-BOL_LEPAA_0927			CSCF-PAP-1022447	0[n]				No				15-Jul-2014	Erebia tyndarus	adult			Natural History Museum of Neuchatel
LEPAA	LEPPA1196-17	GBIFCH-BOL_LEPAA_0928			CSCF-PAP-1217676	0[n]				No				03-Aug-2015	Erebia arvernensis	adult			Natural History Museum of Neuchatel
LEPAA	LEPPA1197-17	GBIFCH-BOL_LEPAA_0929			CSCF-PAP-1043779	0[n]				No				18-Jul-2014	Erebia tyndarus	adult			Natural History Museum of Neuchatel
LEPAA	LEPPA1198-17	GBIFCH-BOL_LEPAA_0930		BOLD:AAB3453	CSCF-PAP-1228683	604[0n]	2			Yes				31-Jul-2015	Erebia tyndarus	adult			Natural History Museum of Neuchatel
LEPAA	LEPPA1199-17	GBIFCH-BOL_LEPAA_0931		BOLD:AAD6229	CSCF-PAP-1049360	616[0n]	1			No				30-Jun-2014	Heteropterus morpheus	adult			Natural History Museum of Neuchatel
LEPAA	LEPPA1200-17	GBIFCH-BOL_LEPAA_0932			CSCF-PAP-1028462	0[n]				No				16-Jul-2014	Melitaea didyma	adult			Natural History Museum of Neuchatel
LEPAA	LEPPA1201-17	GBIFCH-BOL_LEPAA_0933		BOLD:AAB8947	CSCF-PAP-1235652	654[0n]	4			Yes				11-Jun-2015	Lycaena hippothoe eurydice	adult			Natural History Museum of Neuchatel
LEPAA	LEPPA1202-17	GBIFCH-BOL_LEPAA_0934		BOLD:ABZ6967	CSCF-PAP-1282630	654[0n]	2			Yes				18-Jul-2014	Pyrgus accreta	adult			Natural History Museum of Neuchatel
LEPAA	LEPPA1203-17	GBIFCH-BOL_LEPAA_0935		BOLD:AAB8947	CSCF-PAP-1024932	530[0n]	2			No				03-Jul-2014	Lycaena hippothoe eurydice	adult			Natural History Museum of Neuchatel
LEPAA	LEPPA1204-17	GBIFCH-BOL_LEPAA_0936		BOLD:AAB8947	CSCF-PAP-1040739	617[0n]	2			Yes				25-Jul-2014	Lycaena hippothoe eurydame	adult			Natural History Museum of Neuchatel
LEPAA	LEPPA1205-17	GBIFCH-BOL_LEPAA_0937			CSCF-PAP-1001846	0[n]				No				18-Jul-2014	Lycaena hippothoe	adult			Natural History Museum of Neuchatel
LEPAA	LEPPA1206-17	GBIFCH-BOL_LEPAA_0938		BOLD:AAB8947	CSCF-PAP-1064197	381[0n]	3			No				03-Jul-2014	Lycaena hippothoe eurydice	adult			Natural History Museum of Neuchatel
LEPAA	LEPPA1207-17	GBIFCH-BOL_LEPAA_0939			CSCF-PAP-1221929	0[n]				No				11-Jul-2015	Melitaea asteria	adult			Natural History Museum of Neuchatel
LEPAA	LEPPA1208-17	GBIFCH-BOL_LEPAA_0940			CSCF-PAP-1207704	0[n]				No				15-Jul-2015	Melitaea asteria	adult			Natural History Museum of Neuchatel
LEPAA	LEPPA1209-17	GBIFCH-BOL_LEPAA_0941		BOLD:AAA8828	CSCF-PAP-1238939	585[0n]	2			Yes				10-Jul-2015	Melitaea asteria	adult			Natural History Museum of Neuchatel
LEPAA	LEPPA1210-17	GBIFCH-BOL_LEPAA_0942			CSCF-PAP-916718	0[n]				No				08-Jul-2013	Melitaea nevadensis	adult			Natural History Museum of Neuchatel
LEPAA	LEPPA1211-17	GBIFCH-BOL_LEPAA_0943		BOLD:AAA7584	CSCF-PAP-912983	654[0n]	2			Yes				04-Jul-2013	Melitaea nevadensis				Natural History Museum of Neuchatel
LEPAA	LEPPA1231-17	GBIFCH-BOL_LEPAA_0963		BOLD:AAB1728	CSCF-PAP-912960	564[0n]	2			No				31-Jul-2013	Lycaena tityrus tityrus				Natural History Museum of Neuchatel
LEPAA	LEPPA1257-17	GBIFCH-BOL_LEPAA_0990		BOLD:ABX6143	CSCF-PAP-1126164	612[0n]	1			No				19-Jul-2016	Polyommatus amandus	adult			Natural History Museum of Neuchatel
LEPAA	LEPAA907-18	GBIFCH-BOL_LEPAA_1013	Z1	BOLD:AAU2845	CSCF-PAP-2874171	658[0n]	2			Yes				26-Jun-2013	Zygaena osterodensis	adult			Natural History Museum of Neuchatel
LEPAA	LEPAA908-18	GBIFCH-BOL_LEPAA_1014	Z2	BOLD:AAU2845	CSCF-PAP-2874172	658[0n]	2			Yes				26-Jun-2013	Zygaena osterodensis	adult			Natural History Museum of Neuchatel
LEPAA	LEPAA909-18	GBIFCH-BOL_LEPAA_1015	Z3	BOLD:AAU2845	CSCF-PAP-2874170	658[0n]	2			Yes				26-Jun-2013	Zygaena osterodensis				Natural History Museum of Neuchatel
LEPAA	LEPAA910-18	GBIFCH-BOL_LEPAA_1016	Z4	BOLD:AAU2845	CSCF-PAP-2874169	658[0n]	2			Yes				26-Jun-2013	Zygaena osterodensis	adult			Natural History Museum of Neuchatel
LEPAA	LEPAA911-18	GBIFCH-BOL_LEPAA_1017	Z5	BOLD:ADF1340	CSCF-PAP-2874183	658[0n]	2			Yes				23-Jul-2013	Zygaena romeo	adult			Natural History Museum of Neuchatel
LEPAA	LEPAA912-18	GBIFCH-BOL_LEPAA_1018	Z6	BOLD:ADF1340	CSCF-PAP-2874182	658[0n]	2			Yes				23-Jul-2013	Zygaena romeo				Natural History Museum of Neuchatel
LEPAA	LEPAA913-18	GBIFCH-BOL_LEPAA_1019	Z7	BOLD:AAE6704	CSCF-PAP-2874179	658[0n]	2			Yes				23-Jul-2013	Zygaena purpuralis	adult			Natural History Museum of Neuchatel
LEPAA	LEPAA914-18	GBIFCH-BOL_LEPAA_1020	Z11	BOLD:AAD7506	CSCF-PAP-2874164	641[0n]	2			Yes				23-Jul-2013	Zygaena loti	adult			Natural History Museum of Neuchatel
LEPAA	LEPAA915-18	GBIFCH-BOL_LEPAA_1021	Z13	BOLD:AAE6704	CSCF-PAP-2874177	658[0n]	2			Yes				22-Jul-2013	Zygaena purpuralis				Natural History Museum of Neuchatel
LEPAA	LEPAA916-18	GBIFCH-BOL_LEPAA_1022	Z14	BOLD:AAE6704	CSCF-PAP-2874178	658[0n]	2			Yes				22-Jul-2013	Zygaena purpuralis				Natural History Museum of Neuchatel
LEPAA	LEPAA917-18	GBIFCH-BOL_LEPAA_1023	Z15	BOLD:AAD7506	CSCF-PAP-2874163	658[0n]	2			Yes				22-Jul-2013	Zygaena loti	adult			Natural History Museum of Neuchatel
LEPAA	LEPAA918-18	GBIFCH-BOL_LEPAA_1024	Z19	BOLD:ADL6797	CSCF-PAP-2874173	658[0n]	2			Yes				21-Jul-2013	Zygaena osterodensis				Natural History Museum of Neuchatel
LEPAA	LEPAA919-18	GBIFCH-BOL_LEPAA_1025	Z22	BOLD:ADL6797	CSCF-PAP-2874174	658[0n]	2			Yes				21-Jul-2013	Zygaena osterodensis	adult			Natural History Museum of Neuchatel
LEPAA	LEPAA920-18	GBIFCH-BOL_LEPAA_1026	Z23	BOLD:ADL6797	CSCF-PAP-2874175	658[0n]	2			Yes				21-Jul-2013	Zygaena osterodensis	adult			Natural History Museum of Neuchatel
LEPAA	LEPAA921-18	GBIFCH-BOL_LEPAA_1027	Z44	BOLD:ADF1340	CSCF-PAP-957407	651[0n]	2			Yes				03-Jun-2013	Zygaena romeo	immature			Natural History Museum of Neuchatel
LEPAA	LEPAA922-18	GBIFCH-BOL_LEPAA_1028	Z45	BOLD:ADF1340	CSCF-PAP-957412	658[0n]	2			Yes				03-Jun-2013	Zygaena romeo	immature			Natural History Museum of Neuchatel
LEPAA	LEPAA923-18	GBIFCH-BOL_LEPAA_1029	Z46	BOLD:ADF1340	CSCF-PAP-957571	658[0n]	2			Yes				04-Jun-2013	Zygaena romeo	immature			Natural History Museum of Neuchatel
LEPAA	LEPAA924-18	GBIFCH-BOL_LEPAA_1030	Z47	BOLD:ADF1340	CSCF-PAP-957570	658[0n]	2			Yes				04-Jun-2013	Zygaena romeo	immature			Natural History Museum of Neuchatel
LEPAA	LEPAA925-18	GBIFCH-BOL_LEPAA_1031	Z48	BOLD:ADF1340	CSCF-PAP-2874181	658[0n]	2			Yes				01-Jul-2013	Zygaena romeo				Natural History Museum of Neuchatel
LEPAA	LEPAA926-18	GBIFCH-BOL_LEPAA_1032	Z49	BOLD:ADF1340	CSCF-PAP-2874180	658[1n]	2			Yes				07-Jun-2013	Zygaena romeo	immature			Natural History Museum of Neuchatel
LEPAA	LEPAA927-18	GBIFCH-BOL_LEPAA_1033	Z50	BOLD:ADF1340	CSCF-PAP-1202639	658[0n]	2			Yes				04-Jul-2013	Zygaena romeo				Natural History Museum of Neuchatel
LEPAA	LEPAA928-18	GBIFCH-BOL_LEPAA_1034	Z51	BOLD:AAC8126	CSCF-PAP-957408	658[0n]	2			Yes				03-Jun-2013	Zygaena viciae	immature			Natural History Museum of Neuchatel
LEPAA	LEPAA929-18	GBIFCH-BOL_LEPAA_1035	Z52	BOLD:AAH8372	CSCF-PAP-960549	658[0n]	2			Yes				02-Aug-2013	Zygaena carniolica	adult			Natural History Museum of Neuchatel
LEPAA	LEPAA930-18	GBIFCH-BOL_LEPAA_1036	Z53	BOLD:AAD5691	CSCF-PAP-2874176	658[0n]	2			Yes				26-Jul-2013	Rhagades pruni	adult			Natural History Museum of Neuchatel
LEPAA	LEPAA931-18	GBIFCH-BOL_LEPAA_1037	Z54	BOLD:AAU2256	CSCF-PAP-2874165	658[0n]	2			Yes				01-Jul-2013	Jordanita notata	adult			Natural History Museum of Neuchatel
LEPAA	LEPAA932-18	GBIFCH-BOL_LEPAA_1038	Z55	BOLD:ABY4365	CSCF-PAP-1291113	658[0n]	2			Yes				07-Jul-2013	Adscita geryon				Natural History Museum of Neuchatel
LEPAA	LEPAA933-18	GBIFCH-BOL_LEPAA_1039	Z56	BOLD:AAC8100	CSCF-PAP-959361	658[0n]	2			Yes				01-Jul-2013	Zygaena filipendulae	adult			Natural History Museum of Neuchatel
LEPAA	LEPAA934-18	GBIFCH-BOL_LEPAA_1040	Z57	BOLD:ADL6544	CSCF-PAP-2874184	658[0n]	2			Yes				01-Jul-2013	Zygaena transalpina	adult			Natural History Museum of Neuchatel
LEPAA	LEPAA935-18	GBIFCH-BOL_LEPAA_1041	Z58	BOLD:ADF1340	CSCF-PAP-891071	649[0n]	2			Yes				01-Jul-2013	Zygaena romeo	adult			Centre Suisse de Cartographie de la Faune
LEPAA	LEPAA936-18	GBIFCH-BOL_LEPAA_1042	Z59	BOLD:ADF1340	CSCF-PAP-2874155	658[0n]	2			Yes				01-Jul-2013	Zygaena romeo	adult			Centre Suisse de Cartographie de la Faune
LEPAA	LEPAA937-18	GBIFCH-BOL_LEPAA_1043	Z60	BOLD:ADF1340	CSCF-PAP-2874156	658[0n]	2			Yes				01-Jul-2013	Zygaena romeo	adult			Centre Suisse de Cartographie de la Faune
LEPAA	LEPAA938-18	GBIFCH-BOL_LEPAA_1044	Z61	BOLD:ADF1340	CSCF-PAP-2874157	658[0n]	2			Yes				01-Jul-2013	Zygaena romeo	adult			Centre Suisse de Cartographie de la Faune
LEPAA	LEPAA939-18	GBIFCH-BOL_LEPAA_1045	Z62	BOLD:ADL6798	CSCF-PAP-2874166	658[0n]	2			Yes				25-Jul-2013	Zygaena osterodensis				Natural History Museum of Neuchatel
LEPAA	LEPAA940-18	GBIFCH-BOL_LEPAA_1046	Z63	BOLD:ADL6798	CSCF-PAP-2874167	658[0n]	2			Yes				25-Jul-2013	Zygaena osterodensis				Natural History Museum of Neuchatel
LEPAA	LEPAA941-18	GBIFCH-BOL_LEPAA_1047	Z64	BOLD:ADL6798	CSCF-PAP-2874168	658[0n]	2			Yes				25-Jul-2013	Zygaena osterodensis	adult			Natural History Museum of Neuchatel
LEPAA	LEPAA942-18	GBIFCH-BOL_LEPAA_1048	Z65	BOLD:AAU2845	CSCF-PAP-891065	658[0n]	2			Yes				23-Jul-2013	Zygaena osterodensis	adult			Centre Suisse de Cartographie de la Faune
LEPAA	LEPAA943-18	GBIFCH-BOL_LEPAA_1049	Z66	BOLD:AAU2845	CSCF-PAP-2874158	658[0n]	2			Yes				23-Jul-2013	Zygaena osterodensis	adult			Centre Suisse de Cartographie de la Faune
LEPAA	LEPAA944-18	GBIFCH-BOL_LEPAA_1050	Z67	BOLD:AAH9042	CSCF-PAP-2874154	658[0n]	2			Yes				30-Jun-2007	Zygaena trifolii	adult			Centre Suisse de Cartographie de la Faune
LEPAA	LEPAA945-18	GBIFCH-BOL_LEPAA_1051	Z68	BOLD:AAH9042	CSCF-PAP-2874185	658[0n]	2			Yes				12-Jul-2007	Zygaena trifolii	adult			Centre Suisse de Cartographie de la Faune
LEPAA	LEPAA946-18	GBIFCH-BOL_LEPAA_1052	Z69	BOLD:AAE6704	CSCF-PAP-867052	658[0n]	2			Yes				30-May-2012	Zygaena minos				Centre Suisse de Cartographie de la Faune
LEPAA	LEPAA947-18	GBIFCH-BOL_LEPAA_1053	Z70	BOLD:AAE6704	CSCF-PAP-2874153	658[0n]	2			Yes				30-May-2012	Zygaena minos				Centre Suisse de Cartographie de la Faune
LEPAA	LEPAA948-18	GBIFCH-BOL_LEPAA_1054	Z72	BOLD:AAE6704	CSCF-PAP-1291110	658[0n]	2			Yes				07-Jul-2013	Zygaena purpuralis				Natural History Museum of Neuchatel
LEPAA	LEPAA949-18	GBIFCH-BOL_LEPAA_1055	Z74	BOLD:AAE6704	CSCF-PAP-2874159	658[0n]	2			Yes				04-Aug-2009	Zygaena minos				Centre Suisse de Cartographie de la Faune
LEPAA	LEPAA950-18	GBIFCH-BOL_LEPAA_1056	Z75	BOLD:AAJ9881	CSCF-PAP-2874162	658[0n]	2			Yes				05-Aug-2013	Zygaena fausta	adult			Centre Suisse de Cartographie de la Faune
LEPAA	LEPAA951-18	GBIFCH-BOL_LEPAA_1057	Z76	BOLD:AAC8126	CSCF-PAP-963283	658[0n]	2			Yes				24-Jun-2014	Zygaena viciae	adult			Centre Suisse de Cartographie de la Faune
LEPAA	LEPAA952-18	GBIFCH-BOL_LEPAA_1058	Z77	BOLD:AAH8372	CSCF-PAP-694849	658[0n]	2			Yes				19-Jul-2010	Zygaena carniolica	adult			Centre Suisse de Cartographie de la Faune
LEPAA	LEPAA953-18	GBIFCH-BOL_LEPAA_1059	Z78	BOLD:AAD7474	CSCF-PAP-2874160	658[0n]	2			Yes				26-Jul-2010	Zygaena exulans	adult			Centre Suisse de Cartographie de la Faune
LEPAA	LEPAA954-18	GBIFCH-BOL_LEPAA_1060	Z79	BOLD:AAD5447	CSCF-PAP-695716	658[0n]	2			Yes				14-Jul-2010	Zygaena ephialtes				Centre Suisse de Cartographie de la Faune
LEPAA	LEPAA955-18	GBIFCH-BOL_LEPAA_1061	CP1		CSCF-PAP-569456	0[n]				No				06-Aug-2008	Hipparchia fagi				Natural History Museum of Neuchatel
LEPAA	LEPAA956-18	GBIFCH-BOL_LEPAA_1062	CP5	BOLD:AAB5180	CSCF-PAP-912833	601[0n]	2			Yes				15-Aug-2013	Erebia manto				Natural History Museum of Neuchatel
LEPAA	LEPAA957-18	GBIFCH-BOL_LEPAA_1063	CP6	BOLD:AAB5180	CSCF-PAP-912835	521[0n]	2			Yes				10-Aug-2013	Erebia manto				Natural History Museum of Neuchatel
LEPAA	LEPAA958-18	GBIFCH-BOL_LEPAA_1064	CP7		CSCF-PAP-912838		2			No				01-Aug-2013	Erebia manto				Natural History Museum of Neuchatel
LEPAA	LEPAA959-18	GBIFCH-BOL_LEPAA_1065	CP8		CSCF-PAP-2874161	0[n]				No				30-Jul-1985	Hipparchia fagi				Natural History Museum of Neuchatel

## Sheet: Voucher Info
Project:	LEPAA			User:	Jessica R. Litman
Created:	2018-10-10
Sample ID	Field ID	Museum ID	Collection Code	Institution Storing
GBIFCH-BOL_LEPAA_0045		CSCF-PAP-906365		Natural History Museum of Neuchatel
GBIFCH-BOL_LEPAA_0046		CSCF-PAP-906376		Natural History Museum of Neuchatel
GBIFCH-BOL_LEPAA_0047		CSCF-PAP-906363		Natural History Museum of Neuchatel
GBIFCH-BOL_LEPAA_0048		CSCF-PAP-906183		Natural History Museum of Neuchatel
GBIFCH-BOL_LEPAA_0001		CSCF-PAP-892997		Natural History Museum of Neuchatel
GBIFCH-BOL_LEPAA_0002		CSCF-PAP-892782		Natural History Museum of Neuchatel
GBIFCH-BOL_LEPAA_0003		CSCF-PAP-892815		Natural History Museum of Neuchatel
GBIFCH-BOL_LEPAA_0004		CSCF-PAP-892886		Natural History Museum of Neuchatel
GBIFCH-BOL_LEPAA_0005		CSCF-PAP-896260		Natural History Museum of Neuchatel
GBIFCH-BOL_LEPAA_0006		CSCF-PAP-893201		Natural History Museum of Neuchatel
GBIFCH-BOL_LEPAA_0007		CSCF-PAP-896479		Natural History Museum of Neuchatel
GBIFCH-BOL_LEPAA_0008		CSCF-PAP-893071		Natural History Museum of Neuchatel
GBIFCH-BOL_LEPAA_0009		CSCF-PAP-896229		Natural History Museum of Neuchatel
GBIFCH-BOL_LEPAA_0010		CSCF-PAP-892868		Natural History Museum of Neuchatel
GBIFCH-BOL_LEPAA_0011		CSCF-PAP-892870		Natural History Museum of Neuchatel
GBIFCH-BOL_LEPAA_0012		CSCF-PAP-892864		Natural History Museum of Neuchatel
GBIFCH-BOL_LEPAA_0013		CSCF-PAP-896181		Natural History Museum of Neuchatel
GBIFCH-BOL_LEPAA_0014		CSCF-PAP-893217		Natural History Museum of Neuchatel
GBIFCH-BOL_LEPAA_0015		CSCF-PAP-893199		Natural History Museum of Neuchatel
GBIFCH-BOL_LEPAA_0016		CSCF-PAP-896298		Natural History Museum of Neuchatel
GBIFCH-BOL_LEPAA_0017		CSCF-PAP-893131		Natural History Museum of Neuchatel
GBIFCH-BOL_LEPAA_0018		CSCF-PAP-893129		Natural History Museum of Neuchatel
GBIFCH-BOL_LEPAA_0019		CSCF-PAP-893163		Natural History Museum of Neuchatel
GBIFCH-BOL_LEPAA_0020		CSCF-PAP-895982		Natural History Museum of Neuchatel
GBIFCH-BOL_LEPAA_0021		CSCF-PAP-892792		Natural History Museum of Neuchatel
GBIFCH-BOL_LEPAA_0022		CSCF-PAP-896480		Natural History Museum of Neuchatel
GBIFCH-BOL_LEPAA_0023		CSCF-PAP-892900		Natural History Museum of Neuchatel
GBIFCH-BOL_LEPAA_0024		CSCF-PAP-892895		Natural History Museum of Neuchatel
GBIFCH-BOL_LEPAA_0025		CSCF-PAP-896243		Natural History Museum of Neuchatel
GBIFCH-BOL_LEPAA_0026		CSCF-PAP-896244		Natural History Museum of Neuchatel
GBIFCH-BOL_LEPAA_0027		CSCF-PAP-893111		Natural History Museum of Neuchatel
GBIFCH-BOL_LEPAA_0028		CSCF-PAP-896091		Natural History Museum of Neuchatel
GBIFCH-BOL_LEPAA_0029		CSCF-PAP-893089		Natural History Museum of Neuchatel
GBIFCH-BOL_LEPAA_0030		CSCF-PAP-896491		Natural History Museum of Neuchatel
GBIFCH-BOL_LEPAA_0031		CSCF-PAP-906258		Natural History Museum of Neuchatel
GBIFCH-BOL_LEPAA_0032		CSCF-PAP-906259		Natural History Museum of Neuchatel
GBIFCH-BOL_LEPAA_0033		CSCF-PAP-906271		Natural History Museum of Neuchatel
GBIFCH-BOL_LEPAA_0034		CSCF-PAP-906027		Natural History Museum of Neuchatel
GBIFCH-BOL_LEPAA_0035		CSCF-PAP-906031		Natural History Museum of Neuchatel
GBIFCH-BOL_LEPAA_0036		CSCF-PAP-905926		Natural History Museum of Neuchatel
GBIFCH-BOL_LEPAA_0037		CSCF-PAP-893894		Natural History Museum of Neuchatel
GBIFCH-BOL_LEPAA_0038		CSCF-PAP-906353		Natural History Museum of Neuchatel
GBIFCH-BOL_LEPAA_0039		CSCF-PAP-893700		Natural History Museum of Neuchatel
GBIFCH-BOL_LEPAA_0040		CSCF-PAP-893999		Natural History Museum of Neuchatel
GBIFCH-BOL_LEPAA_0041		CSCF-PAP-894150		Natural History Museum of Neuchatel
GBIFCH-BOL_LEPAA_0042		CSCF-PAP-893625		Natural History Museum of Neuchatel
GBIFCH-BOL_LEPAA_0043		CSCF-PAP-906354		Natural History Museum of Neuchatel
GBIFCH-BOL_LEPAA_0044		CSCF-PAP-906356		Natural History Museum of Neuchatel
GBIFCH-BOL_LEPAA_0049		CSCF-PAP-905981		Natural History Museum of Neuchatel
GBIFCH-BOL_LEPAA_0050		CSCF-PAP-905980		Natural History Museum of Neuchatel
GBIFCH-BOL_LEPAA_0051		CSCF-PAP-906349		Natural History Museum of Neuchatel
GBIFCH-BOL_LEPAA_0052		CSCF-PAP-906252		Natural History Museum of Neuchatel
GBIFCH-BOL_LEPAA_0053		CSCF-PAP-894039		Natural History Museum of Neuchatel
GBIFCH-BOL_LEPAA_0054		CSCF-PAP-893916		Natural History Museum of Neuchatel
GBIFCH-BOL_LEPAA_0055		CSCF-PAP-894766		Natural History Museum of Neuchatel
GBIFCH-BOL_LEPAA_0056		CSCF-PAP-894884		Natural History Museum of Neuchatel
GBIFCH-BOL_LEPAA_0057		CSCF-PAP-894441		Natural History Museum of Neuchatel
GBIFCH-BOL_LEPAA_0058		CSCF-PAP-894912		Natural History Museum of Neuchatel
GBIFCH-BOL_LEPAA_0059		CSCF-PAP-894480		Natural History Museum of Neuchatel
GBIFCH-BOL_LEPAA_0060		CSCF-PAP-894767		Natural History Museum of Neuchatel
GBIFCH-BOL_LEPAA_0061		CSCF-PAP-894432		Natural History Museum of Neuchatel
GBIFCH-BOL_LEPAA_0062		CSCF-PAP-894481		Natural History Museum of Neuchatel
GBIFCH-BOL_LEPAA_0063		CSCF-PAP-894431		Natural History Museum of Neuchatel
GBIFCH-BOL_LEPAA_0064		CSCF-PAP-894638		Natural History Museum of Neuchatel
GBIFCH-BOL_LEPAA_0065		CSCF-PAP-895451		Natural History Museum of Neuchatel
GBIFCH-BOL_LEPAA_0066		CSCF-PAP-894926		Natural History Museum of Neuchatel
GBIFCH-BOL_LEPAA_0067		CSCF-PAP-894542		Natural History Museum of Neuchatel
GBIFCH-BOL_LEPAA_0068		CSCF-PAP-894564		Natural History Museum of Neuchatel
GBIFCH-BOL_LEPAA_0069		CSCF-PAP-894685		Natural History Museum of Neuchatel
GBIFCH-BOL_LEPAA_0070		CSCF-PAP-894563		Natural History Museum of Neuchatel
GBIFCH-BOL_LEPAA_0071		CSCF-PAP-894879		Natural History Museum of Neuchatel
GBIFCH-BOL_LEPAA_0072		CSCF-PAP-895023		Natural History Museum of Neuchatel
GBIFCH-BOL_LEPAA_0073		CSCF-PAP-905807		Natural History Museum of Neuchatel
GBIFCH-BOL_LEPAA_0074		CSCF-PAP-905808		Natural History Museum of Neuchatel
GBIFCH-BOL_LEPAA_0075		CSCF-PAP-905809		Natural History Museum of Neuchatel
GBIFCH-BOL_LEPAA_0076		CSCF-PAP-905803		Natural History Museum of Neuchatel
GBIFCH-BOL_LEPAA_0077		CSCF-PAP-905823		Natural History Museum of Neuchatel
GBIFCH-BOL_LEPAA_0078		CSCF-PAP-905819		Natural History Museum of Neuchatel
GBIFCH-BOL_LEPAA_0079		CSCF-PAP-905779		Natural History Museum of Neuchatel
GBIFCH-BOL_LEPAA_0080		CSCF-PAP-905799		Natural History Museum of Neuchatel
GBIFCH-BOL_LEPAA_0081		CSCF-PAP-905800		Natural History Museum of Neuchatel
GBIFCH-BOL_LEPAA_0082		CSCF-PAP-905964		Natural History Museum of Neuchatel
GBIFCH-BOL_LEPAA_0083		CSCF-PAP-906233		Natural History Museum of Neuchatel
GBIFCH-BOL_LEPAA_0084		CSCF-PAP-905954		Natural History Museum of Neuchatel
GBIFCH-BOL_LEPAA_0085		CSCF-PAP-893650		Natural History Museum of Neuchatel
GBIFCH-BOL_LEPAA_0086		CSCF-PAP-906217		Natural History Museum of Neuchatel
GBIFCH-BOL_LEPAA_0087		CSCF-PAP-906193		Natural History Museum of Neuchatel
GBIFCH-BOL_LEPAA_0088		CSCF-PAP-906187		Natural History Museum of Neuchatel
GBIFCH-BOL_LEPAA_0089		CSCF-PAP-894091		Natural History Museum of Neuchatel
GBIFCH-BOL_LEPAA_0090		CSCF-PAP-893849		Natural History Museum of Neuchatel
GBIFCH-BOL_LEPAA_0091		CSCF-PAP-894304		Natural History Museum of Neuchatel
GBIFCH-BOL_LEPAA_0092		CSCF-PAP-905973		Natural History Museum of Neuchatel
GBIFCH-BOL_LEPAA_0093		CSCF-PAP-905967		Natural History Museum of Neuchatel
GBIFCH-BOL_LEPAA_0094		CSCF-PAP-906242		Natural History Museum of Neuchatel
GBIFCH-BOL_LEPAA_0095		CSCF-PAP-906178		Natural History Museum of Neuchatel
GBIFCH-BOL_LEPAA_0096		CSCF-PAP-905944		Natural History Museum of Neuchatel
GBIFCH-BOL_LEPAA_0097		CSCF-PAP-906196		Natural History Museum of Neuchatel
GBIFCH-BOL_LEPAA_0098		CSCF-PAP-906256		Natural History Museum of Neuchatel
GBIFCH-BOL_LEPAA_0099		CSCF-PAP-894218		Natural History Museum of Neuchatel
GBIFCH-BOL_LEPAA_0100		CSCF-PAP-893713		Natural History Museum of Neuchatel
GBIFCH-BOL_LEPAA_0101		CSCF-PAP-906041		Natural History Museum of Neuchatel
GBIFCH-BOL_LEPAA_0102		CSCF-PAP-906093		Natural History Museum of Neuchatel
GBIFCH-BOL_LEPAA_0103		CSCF-PAP-906099		Natural History Museum of Neuchatel
GBIFCH-BOL_LEPAA_0104		CSCF-PAP-906144		Natural History Museum of Neuchatel
GBIFCH-BOL_LEPAA_0105		CSCF-PAP-906064		Natural History Museum of Neuchatel
GBIFCH-BOL_LEPAA_0106		CSCF-PAP-905998		Natural History Museum of Neuchatel
GBIFCH-BOL_LEPAA_0107		CSCF-PAP-905987		Natural History Museum of Neuchatel
GBIFCH-BOL_LEPAA_0108		CSCF-PAP-894151		Natural History Museum of Neuchatel
GBIFCH-BOL_LEPAA_0109		CSCF-PAP-893720		Natural History Museum of Neuchatel
GBIFCH-BOL_LEPAA_0110		CSCF-PAP-894296		Natural History Museum of Neuchatel
GBIFCH-BOL_LEPAA_0111		CSCF-PAP-893819		Natural History Museum of Neuchatel
GBIFCH-BOL_LEPAA_0112		CSCF-PAP-906072		Natural History Museum of Neuchatel
GBIFCH-BOL_LEPAA_0113		CSCF-PAP-906151		Natural History Museum of Neuchatel
GBIFCH-BOL_LEPAA_0114		CSCF-PAP-905950		Natural History Museum of Neuchatel
GBIFCH-BOL_LEPAA_0115		CSCF-PAP-906037		Natural History Museum of Neuchatel
GBIFCH-BOL_LEPAA_0116		CSCF-PAP-906198		Natural History Museum of Neuchatel
GBIFCH-BOL_LEPAA_0117		CSCF-PAP-905951		Natural History Museum of Neuchatel
GBIFCH-BOL_LEPAA_0118		CSCF-PAP-906285		Natural History Museum of Neuchatel
GBIFCH-BOL_LEPAA_0119		CSCF-PAP-893654		Natural History Museum of Neuchatel
GBIFCH-BOL_LEPAA_0120		CSCF-PAP-894026		Natural History Museum of Neuchatel
GBIFCH-BOL_LEPAA_0121		CSCF-PAP-894038		Natural History Museum of Neuchatel
GBIFCH-BOL_LEPAA_0122		CSCF-PAP-906284		Natural History Museum of Neuchatel
GBIFCH-BOL_LEPAA_0123		CSCF-PAP-906370		Natural History Museum of Neuchatel
GBIFCH-BOL_LEPAA_0124		CSCF-PAP-906251		Natural History Museum of Neuchatel
GBIFCH-BOL_LEPAA_0125		CSCF-PAP-906145		Natural History Museum of Neuchatel
GBIFCH-BOL_LEPAA_0126		CSCF-PAP-906095		Natural History Museum of Neuchatel
GBIFCH-BOL_LEPAA_0127		CSCF-PAP-906136		Natural History Museum of Neuchatel
GBIFCH-BOL_LEPAA_0128		CSCF-PAP-906342		Natural History Museum of Neuchatel
GBIFCH-BOL_LEPAA_0129		CSCF-PAP-894421		Natural History Museum of Neuchatel
GBIFCH-BOL_LEPAA_0130		CSCF-PAP-894339		Natural History Museum of Neuchatel
GBIFCH-BOL_LEPAA_0131		CSCF-PAP-894995		Natural History Museum of Neuchatel
GBIFCH-BOL_LEPAA_0132		CSCF-PAP-894402		Natural History Museum of Neuchatel
GBIFCH-BOL_LEPAA_0133		CSCF-PAP-894703		Natural History Museum of Neuchatel
GBIFCH-BOL_LEPAA_0134		CSCF-PAP-894812		Natural History Museum of Neuchatel
GBIFCH-BOL_LEPAA_0135		CSCF-PAP-894382		Natural History Museum of Neuchatel
GBIFCH-BOL_LEPAA_0136		CSCF-PAP-895010		Natural History Museum of Neuchatel
GBIFCH-BOL_LEPAA_0137		CSCF-PAP-894394		Natural History Museum of Neuchatel
GBIFCH-BOL_LEPAA_0138		CSCF-PAP-894418		Natural History Museum of Neuchatel
GBIFCH-BOL_LEPAA_0139		CSCF-PAP-895421		Natural History Museum of Neuchatel
GBIFCH-BOL_LEPAA_0140		CSCF-PAP-894380		Natural History Museum of Neuchatel
GBIFCH-BOL_LEPAA_0141		CSCF-PAP-894937		Natural History Museum of Neuchatel
GBIFCH-BOL_LEPAA_0142		CSCF-PAP-895217		Natural History Museum of Neuchatel
GBIFCH-BOL_LEPAA_0143		CSCF-PAP-894364		Natural History Museum of Neuchatel
GBIFCH-BOL_LEPAA_0144		CSCF-PAP-895408		Natural History Museum of Neuchatel
GBIFCH-BOL_LEPAA_0145		CSCF-PAP-894345		Natural History Museum of Neuchatel
GBIFCH-BOL_LEPAA_0146		CSCF-PAP-894415		Natural History Museum of Neuchatel
GBIFCH-BOL_LEPAA_0147		CSCF-PAP-906330		Natural History Museum of Neuchatel
GBIFCH-BOL_LEPAA_0148		CSCF-PAP-894385		Natural History Museum of Neuchatel
GBIFCH-BOL_LEPAA_0149		CSCF-PAP-894831		Natural History Museum of Neuchatel
GBIFCH-BOL_LEPAA_0150		CSCF-PAP-894383		Natural History Museum of Neuchatel
GBIFCH-BOL_LEPAA_0151		CSCF-PAP-890919		Natural History Museum of Neuchatel
GBIFCH-BOL_LEPAA_0152		CSCF-PAP-890509		Natural History Museum of Neuchatel
GBIFCH-BOL_LEPAA_0153		CSCF-PAP-890825		Natural History Museum of Neuchatel
GBIFCH-BOL_LEPAA_0154		CSCF-PAP-890707		Natural History Museum of Neuchatel
GBIFCH-BOL_LEPAA_0155		CSCF-PAP-890842		Natural History Museum of Neuchatel
GBIFCH-BOL_LEPAA_0156		CSCF-PAP-890846		Natural History Museum of Neuchatel
GBIFCH-BOL_LEPAA_0157		CSCF-PAP-890750		Natural History Museum of Neuchatel
GBIFCH-BOL_LEPAA_0158		CSCF-PAP-890670		Natural History Museum of Neuchatel
GBIFCH-BOL_LEPAA_0159		CSCF-PAP-890502		Natural History Museum of Neuchatel
GBIFCH-BOL_LEPAA_0160		CSCF-PAP-890892		Natural History Museum of Neuchatel
GBIFCH-BOL_LEPAA_0161		CSCF-PAP-890861		Natural History Museum of Neuchatel
GBIFCH-BOL_LEPAA_0162		CSCF-PAP-890723		Natural History Museum of Neuchatel
GBIFCH-BOL_LEPAA_0163		CSCF-PAP-890662		Natural History Museum of Neuchatel
GBIFCH-BOL_LEPAA_0164		CSCF-PAP-890655		Natural History Museum of Neuchatel
GBIFCH-BOL_LEPAA_0165		CSCF-PAP-891063		Natural History Museum of Neuchatel
GBIFCH-BOL_LEPAA_0166		CSCF-PAP-891033		Natural History Museum of Neuchatel
GBIFCH-BOL_LEPAA_0167		CSCF-PAP-890693		Natural History Museum of Neuchatel
GBIFCH-BOL_LEPAA_0168		CSCF-PAP-890959		Natural History Museum of Neuchatel
GBIFCH-BOL_LEPAA_0169		CSCF-PAP-891000		Natural History Museum of Neuchatel
GBIFCH-BOL_LEPAA_0170		CSCF-PAP-890571		Natural History Museum of Neuchatel
GBIFCH-BOL_LEPAA_0171		CSCF-PAP-894310		Natural History Museum of Neuchatel
GBIFCH-BOL_LEPAA_0172		CSCF-PAP-890617		Natural History Museum of Neuchatel
GBIFCH-BOL_LEPAA_0173		CSCF-PAP-890585		Natural History Museum of Neuchatel
GBIFCH-BOL_LEPAA_0174		CSCF-PAP-890570		Natural History Museum of Neuchatel
GBIFCH-BOL_LEPAA_0175		CSCF-PAP-890569		Natural History Museum of Neuchatel
GBIFCH-BOL_LEPAA_0176		CSCF-PAP-890553		Natural History Museum of Neuchatel
GBIFCH-BOL_LEPAA_0177		CSCF-PAP-890678		Natural History Museum of Neuchatel
GBIFCH-BOL_LEPAA_0178		CSCF-PAP-890780		Natural History Museum of Neuchatel
GBIFCH-BOL_LEPAA_0179		CSCF-PAP-893308		Natural History Museum of Neuchatel
GBIFCH-BOL_LEPAA_0180		CSCF-PAP-893317		Natural History Museum of Neuchatel
GBIFCH-BOL_LEPAA_0181		CSCF-PAP-896437		Natural History Museum of Neuchatel
GBIFCH-BOL_LEPAA_0182		CSCF-PAP-893211		Natural History Museum of Neuchatel
GBIFCH-BOL_LEPAA_0183		CSCF-PAP-896110		Natural History Museum of Neuchatel
GBIFCH-BOL_LEPAA_0184		CSCF-PAP-896111		Natural History Museum of Neuchatel
GBIFCH-BOL_LEPAA_0185		CSCF-PAP-896061		Natural History Museum of Neuchatel
GBIFCH-BOL_LEPAA_0186		CSCF-PAP-896112		Natural History Museum of Neuchatel
GBIFCH-BOL_LEPAA_0187		CSCF-PAP-896568		Natural History Museum of Neuchatel
GBIFCH-BOL_LEPAA_0188		CSCF-PAP-893323		Natural History Museum of Neuchatel
GBIFCH-BOL_LEPAA_0189		CSCF-PAP-893550		Natural History Museum of Neuchatel
GBIFCH-BOL_LEPAA_0190		CSCF-PAP-895731		Natural History Museum of Neuchatel
GBIFCH-BOL_LEPAA_0191		CSCF-PAP-895603		Natural History Museum of Neuchatel
GBIFCH-BOL_LEPAA_0192		CSCF-PAP-890994		Natural History Museum of Neuchatel
GBIFCH-BOL_LEPAA_0193		CSCF-PAP-890969		Natural History Museum of Neuchatel
GBIFCH-BOL_LEPAA_0194	97859	CSCF-PAP-899012		Natural History Museum of Neuchatel
GBIFCH-BOL_LEPAA_0195		CSCF-PAP-893986		Natural History Museum of Neuchatel
GBIFCH-BOL_LEPAA_0196		CSCF-PAP-894241		Natural History Museum of Neuchatel
GBIFCH-BOL_LEPAA_0197		CSCF-PAP-890563		Natural History Museum of Neuchatel
GBIFCH-BOL_LEPAA_0198		CSCF-PAP-890652		Natural History Museum of Neuchatel
GBIFCH-BOL_LEPAA_0199		CSCF-PAP-890970		Natural History Museum of Neuchatel
GBIFCH-BOL_LEPAA_0200		CSCF-PAP-890734		Natural History Museum of Neuchatel
GBIFCH-BOL_LEPAA_0201		CSCF-PAP-890475		Natural History Museum of Neuchatel
GBIFCH-BOL_LEPAA_0202		CSCF-PAP-890944		Natural History Museum of Neuchatel
GBIFCH-BOL_LEPAA_0203		CSCF-PAP-895968		Natural History Museum of Neuchatel
GBIFCH-BOL_LEPAA_0204		CSCF-PAP-893370		Natural History Museum of Neuchatel
GBIFCH-BOL_LEPAA_0205		CSCF-PAP-893618		Natural History Museum of Neuchatel
GBIFCH-BOL_LEPAA_0206		CSCF-PAP-893520		Natural History Museum of Neuchatel
GBIFCH-BOL_LEPAA_0207		CSCF-PAP-890490		Natural History Museum of Neuchatel
GBIFCH-BOL_LEPAA_0208		CSCF-PAP-890708		Natural History Museum of Neuchatel
GBIFCH-BOL_LEPAA_0209		CSCF-PAP-890847		Natural History Museum of Neuchatel
GBIFCH-BOL_LEPAA_0210		CSCF-PAP-893165		Natural History Museum of Neuchatel
GBIFCH-BOL_LEPAA_0211		CSCF-PAP-891054		Natural History Museum of Neuchatel
GBIFCH-BOL_LEPAA_0212		CSCF-PAP-893206		Natural History Museum of Neuchatel
GBIFCH-BOL_LEPAA_0213		CSCF-PAP-893262		Natural History Museum of Neuchatel
GBIFCH-BOL_LEPAA_0214	99670	CSCF-PAP-899160		Natural History Museum of Neuchatel
GBIFCH-BOL_LEPAA_0215		CSCF-PAP-894002		Natural History Museum of Neuchatel
GBIFCH-BOL_LEPAA_0216		CSCF-PAP-906337		Natural History Museum of Neuchatel
GBIFCH-BOL_LEPAA_0217		CSCF-PAP-892714		Natural History Museum of Neuchatel
GBIFCH-BOL_LEPAA_0218		CSCF-PAP-890986		Natural History Museum of Neuchatel
GBIFCH-BOL_LEPAA_0219		CSCF-PAP-890620		Natural History Museum of Neuchatel
GBIFCH-BOL_LEPAA_0220	97425	CSCF-PAP-898978		Natural History Museum of Neuchatel
GBIFCH-BOL_LEPAA_0221		CSCF-PAP-890638		Natural History Museum of Neuchatel
GBIFCH-BOL_LEPAA_0222		CSCF-PAP-890646		Natural History Museum of Neuchatel
GBIFCH-BOL_LEPAA_0223		CSCF-PAP-890661		Natural History Museum of Neuchatel
GBIFCH-BOL_LEPAA_0224		CSCF-PAP-890506		Natural History Museum of Neuchatel
GBIFCH-BOL_LEPAA_0225		CSCF-PAP-890515		Natural History Museum of Neuchatel
GBIFCH-BOL_LEPAA_0226		CSCF-PAP-890508		Natural History Museum of Neuchatel
GBIFCH-BOL_LEPAA_0227		CSCF-PAP-890688		Natural History Museum of Neuchatel
GBIFCH-BOL_LEPAA_0228		CSCF-PAP-890691		Natural History Museum of Neuchatel
GBIFCH-BOL_LEPAA_0229		CSCF-PAP-890908		Natural History Museum of Neuchatel
GBIFCH-BOL_LEPAA_0230		CSCF-PAP-891031		Natural History Museum of Neuchatel
GBIFCH-BOL_LEPAA_0231		CSCF-PAP-890453		Natural History Museum of Neuchatel
GBIFCH-BOL_LEPAA_0232		CSCF-PAP-890668		Natural History Museum of Neuchatel
GBIFCH-BOL_LEPAA_0233		CSCF-PAP-890607		Natural History Museum of Neuchatel
GBIFCH-BOL_LEPAA_0234		CSCF-PAP-890690		Natural History Museum of Neuchatel
GBIFCH-BOL_LEPAA_0235		CSCF-PAP-890540		Natural History Museum of Neuchatel
GBIFCH-BOL_LEPAA_0236		CSCF-PAP-890539		Natural History Museum of Neuchatel
GBIFCH-BOL_LEPAA_0237		CSCF-PAP-890830		Natural History Museum of Neuchatel
GBIFCH-BOL_LEPAA_0238		CSCF-PAP-890974		Natural History Museum of Neuchatel
GBIFCH-BOL_LEPAA_0239		CSCF-PAP-890973		Natural History Museum of Neuchatel
GBIFCH-BOL_LEPAA_0240		CSCF-PAP-890499		Natural History Museum of Neuchatel
GBIFCH-BOL_LEPAA_0241		CSCF-PAP-890948		Natural History Museum of Neuchatel
GBIFCH-BOL_LEPAA_0242		CSCF-PAP-890524		Natural History Museum of Neuchatel
GBIFCH-BOL_LEPAA_0243		CSCF-PAP-890667		Natural History Museum of Neuchatel
GBIFCH-BOL_LEPAA_0244		CSCF-PAP-890716		Natural History Museum of Neuchatel
GBIFCH-BOL_LEPAA_0245		CSCF-PAP-890575		Natural History Museum of Neuchatel
GBIFCH-BOL_LEPAA_0246		CSCF-PAP-890710		Natural History Museum of Neuchatel
GBIFCH-BOL_LEPAA_0247		CSCF-PAP-890486		Natural History Museum of Neuchatel
GBIFCH-BOL_LEPAA_0248		CSCF-PAP-890513		Natural History Museum of Neuchatel
GBIFCH-BOL_LEPAA_0249		CSCF-PAP-890538		Natural History Museum of Neuchatel
GBIFCH-BOL_LEPAA_0250		CSCF-PAP-891053		Natural History Museum of Neuchatel
GBIFCH-BOL_LEPAA_0251		CSCF-PAP-893380		Natural History Museum of Neuchatel
GBIFCH-BOL_LEPAA_0252		CSCF-PAP-891074		Natural History Museum of Neuchatel
GBIFCH-BOL_LEPAA_0253		CSCF-PAP-891016		Natural History Museum of Neuchatel
GBIFCH-BOL_LEPAA_0254		CSCF-PAP-890852		Natural History Museum of Neuchatel
GBIFCH-BOL_LEPAA_0255		CSCF-PAP-890789		Natural History Museum of Neuchatel
GBIFCH-BOL_LEPAA_0256		CSCF-PAP-890781		Natural History Museum of Neuchatel
GBIFCH-BOL_LEPAA_0257		CSCF-PAP-890940		Natural History Museum of Neuchatel
GBIFCH-BOL_LEPAA_0258		CSCF-PAP-890790		Natural History Museum of Neuchatel
GBIFCH-BOL_LEPAA_0259		CSCF-PAP-890760		Natural History Museum of Neuchatel
GBIFCH-BOL_LEPAA_0260		CSCF-PAP-890666		Natural History Museum of Neuchatel
GBIFCH-BOL_LEPAA_0261		CSCF-PAP-890657		Natural History Museum of Neuchatel
GBIFCH-BOL_LEPAA_0262		CSCF-PAP-893617		Natural History Museum of Neuchatel
GBIFCH-BOL_LEPAA_0263		CSCF-PAP-890868		Natural History Museum of Neuchatel
GBIFCH-BOL_LEPAA_0264		CSCF-PAP-890392		Natural History Museum of Neuchatel
GBIFCH-BOL_LEPAA_0265		CSCF-PAP-890390		Natural History Museum of Neuchatel
GBIFCH-BOL_LEPAA_0266		CSCF-PAP-890779		Natural History Museum of Neuchatel
GBIFCH-BOL_LEPAA_0267		CSCF-PAP-890971		Natural History Museum of Neuchatel
GBIFCH-BOL_LEPAA_0268		CSCF-PAP-890952		Natural History Museum of Neuchatel
GBIFCH-BOL_LEPAA_0269		CSCF-PAP-890420		Natural History Museum of Neuchatel
GBIFCH-BOL_LEPAA_0270		CSCF-PAP-890951		Natural History Museum of Neuchatel
GBIFCH-BOL_LEPAA_0271		CSCF-PAP-890696		Natural History Museum of Neuchatel
GBIFCH-BOL_LEPAA_0272		CSCF-PAP-893626		Natural History Museum of Neuchatel
GBIFCH-BOL_LEPAA_0273		CSCF-PAP-890907		Natural History Museum of Neuchatel
GBIFCH-BOL_LEPAA_0274		CSCF-PAP-890452		Natural History Museum of Neuchatel
GBIFCH-BOL_LEPAA_0275		CSCF-PAP-890729		Natural History Museum of Neuchatel
GBIFCH-BOL_LEPAA_0276		CSCF-PAP-890882		Natural History Museum of Neuchatel
GBIFCH-BOL_LEPAA_0277		CSCF-PAP-890594		Natural History Museum of Neuchatel
GBIFCH-BOL_LEPAA_0278		CSCF-PAP-890600		Natural History Museum of Neuchatel
GBIFCH-BOL_LEPAA_0279		CSCF-PAP-890591		Natural History Museum of Neuchatel
GBIFCH-BOL_LEPAA_0280		CSCF-PAP-890997		Natural History Museum of Neuchatel
GBIFCH-BOL_LEPAA_0281		CSCF-PAP-890932		Natural History Museum of Neuchatel
GBIFCH-BOL_LEPAA_0282		CSCF-PAP-890920		Natural History Museum of Neuchatel
GBIFCH-BOL_LEPAA_0283		CSCF-PAP-913035		Natural History Museum of Neuchatel
GBIFCH-BOL_LEPAA_0284		CSCF-PAP-913017		Natural History Museum of Neuchatel
GBIFCH-BOL_LEPAA_0285		CSCF-PAP-913018		Natural History Museum of Neuchatel
GBIFCH-BOL_LEPAA_0286		CSCF-PAP-913195		Natural History Museum of Neuchatel
GBIFCH-BOL_LEPAA_0287		CSCF-PAP-913198		Natural History Museum of Neuchatel
GBIFCH-BOL_LEPAA_0288		CSCF-PAP-913014		Natural History Museum of Neuchatel
GBIFCH-BOL_LEPAA_0289		CSCF-PAP-912673		Natural History Museum of Neuchatel
GBIFCH-BOL_LEPAA_0290		CSCF-PAP-913039		Natural History Museum of Neuchatel
GBIFCH-BOL_LEPAA_0291		CSCF-PAP-912768		Natural History Museum of Neuchatel
GBIFCH-BOL_LEPAA_0292		CSCF-PAP-912913		Natural History Museum of Neuchatel
GBIFCH-BOL_LEPAA_0293		CSCF-PAP-912647		Natural History Museum of Neuchatel
GBIFCH-BOL_LEPAA_0294		CSCF-PAP-912676		Natural History Museum of Neuchatel
GBIFCH-BOL_LEPAA_0295		CSCF-PAP-912690		Natural History Museum of Neuchatel
GBIFCH-BOL_LEPAA_0296		CSCF-PAP-912687		Natural History Museum of Neuchatel
GBIFCH-BOL_LEPAA_0297		CSCF-PAP-912680		Natural History Museum of Neuchatel
GBIFCH-BOL_LEPAA_0298		CSCF-PAP-912773		Natural History Museum of Neuchatel
GBIFCH-BOL_LEPAA_0299		CSCF-PAP-913056		Natural History Museum of Neuchatel
GBIFCH-BOL_LEPAA_0300		CSCF-PAP-912973		Natural History Museum of Neuchatel
GBIFCH-BOL_LEPAA_0301		CSCF-PAP-913032		Natural History Museum of Neuchatel
GBIFCH-BOL_LEPAA_0302		CSCF-PAP-912990		Natural History Museum of Neuchatel
GBIFCH-BOL_LEPAA_0303		CSCF-PAP-912991		Natural History Museum of Neuchatel
GBIFCH-BOL_LEPAA_0304		CSCF-PAP-912750		Natural History Museum of Neuchatel
GBIFCH-BOL_LEPAA_0305		CSCF-PAP-912756		Natural History Museum of Neuchatel
GBIFCH-BOL_LEPAA_0306		CSCF-PAP-912749		Natural History Museum of Neuchatel
GBIFCH-BOL_LEPAA_0307		CSCF-PAP-912957		Natural History Museum of Neuchatel
GBIFCH-BOL_LEPAA_0308		CSCF-PAP-912688		Natural History Museum of Neuchatel
GBIFCH-BOL_LEPAA_0309		CSCF-PAP-912678		Natural History Museum of Neuchatel
GBIFCH-BOL_LEPAA_0310		CSCF-PAP-912899		Natural History Museum of Neuchatel
GBIFCH-BOL_LEPAA_0311		CSCF-PAP-912867		Natural History Museum of Neuchatel
GBIFCH-BOL_LEPAA_0312		CSCF-PAP-912896		Natural History Museum of Neuchatel
GBIFCH-BOL_LEPAA_0313		CSCF-PAP-912796		Natural History Museum of Neuchatel
GBIFCH-BOL_LEPAA_0314		CSCF-PAP-912906		Natural History Museum of Neuchatel
GBIFCH-BOL_LEPAA_0315		CSCF-PAP-912800		Natural History Museum of Neuchatel
GBIFCH-BOL_LEPAA_0316		CSCF-PAP-912708		Natural History Museum of Neuchatel
GBIFCH-BOL_LEPAA_0317		CSCF-PAP-913021		Natural History Museum of Neuchatel
GBIFCH-BOL_LEPAA_0318		CSCF-PAP-912937		Natural History Museum of Neuchatel
GBIFCH-BOL_LEPAA_0319		CSCF-PAP-912736		Natural History Museum of Neuchatel
GBIFCH-BOL_LEPAA_0320		CSCF-PAP-913055		Natural History Museum of Neuchatel
GBIFCH-BOL_LEPAA_0321		CSCF-PAP-913031		Natural History Museum of Neuchatel
GBIFCH-BOL_LEPAA_0322		CSCF-PAP-913012		Natural History Museum of Neuchatel
GBIFCH-BOL_LEPAA_0323		CSCF-PAP-912772		Natural History Museum of Neuchatel
GBIFCH-BOL_LEPAA_0324		CSCF-PAP-912975		Natural History Museum of Neuchatel
GBIFCH-BOL_LEPAA_0325		CSCF-PAP-912933		Natural History Museum of Neuchatel
GBIFCH-BOL_LEPAA_0326		CSCF-PAP-913048		Natural History Museum of Neuchatel
GBIFCH-BOL_LEPAA_0327		CSCF-PAP-912729		Natural History Museum of Neuchatel
GBIFCH-BOL_LEPAA_0328		CSCF-PAP-912734		Natural History Museum of Neuchatel
GBIFCH-BOL_LEPAA_0329		CSCF-PAP-912821		Natural History Museum of Neuchatel
GBIFCH-BOL_LEPAA_0330		CSCF-PAP-912839		Natural History Museum of Neuchatel
GBIFCH-BOL_LEPAA_0331		CSCF-PAP-912897		Natural History Museum of Neuchatel
GBIFCH-BOL_LEPAA_0332		CSCF-PAP-912900		Natural History Museum of Neuchatel
GBIFCH-BOL_LEPAA_0333		CSCF-PAP-912738		Natural History Museum of Neuchatel
GBIFCH-BOL_LEPAA_0334		CSCF-PAP-912754		Natural History Museum of Neuchatel
GBIFCH-BOL_LEPAA_0335		CSCF-PAP-912753		Natural History Museum of Neuchatel
GBIFCH-BOL_LEPAA_0336		CSCF-PAP-913242		Natural History Museum of Neuchatel
GBIFCH-BOL_LEPAA_0337		CSCF-PAP-912661		Natural History Museum of Neuchatel
GBIFCH-BOL_LEPAA_0338		CSCF-PAP-912642		Natural History Museum of Neuchatel
GBIFCH-BOL_LEPAA_0339		CSCF-PAP-909097		Natural History Museum of Neuchatel
GBIFCH-BOL_LEPAA_0340		CSCF-PAP-909088		Natural History Museum of Neuchatel
GBIFCH-BOL_LEPAA_0341		CSCF-PAP-909089		Natural History Museum of Neuchatel
GBIFCH-BOL_LEPAA_0342		CSCF-PAP-909096		Natural History Museum of Neuchatel
GBIFCH-BOL_LEPAA_0343		CSCF-PAP-909090		Natural History Museum of Neuchatel
GBIFCH-BOL_LEPAA_0344		CSCF-PAP-909099		Natural History Museum of Neuchatel
GBIFCH-BOL_LEPAA_0345		CSCF-PAP-909094		Natural History Museum of Neuchatel
GBIFCH-BOL_LEPAA_0346		CSCF-PAP-909093		Natural History Museum of Neuchatel
GBIFCH-BOL_LEPAA_0347		CSCF-PAP-909086		Natural History Museum of Neuchatel
GBIFCH-BOL_LEPAA_0348		CSCF-PAP-909087		Natural History Museum of Neuchatel
GBIFCH-BOL_LEPAA_0349		CSCF-PAP-909098		Natural History Museum of Neuchatel
GBIFCH-BOL_LEPAA_0350		CSCF-PAP-909100		Natural History Museum of Neuchatel
GBIFCH-BOL_LEPAA_0351		CSCF-PAP-909092		Natural History Museum of Neuchatel
GBIFCH-BOL_LEPAA_0352		CSCF-PAP-909091		Natural History Museum of Neuchatel
GBIFCH-BOL_LEPAA_0353		CSCF-PAP-909103		Natural History Museum of Neuchatel
GBIFCH-BOL_LEPAA_0354		CSCF-PAP-909104		Natural History Museum of Neuchatel
GBIFCH-BOL_LEPAA_0355		CSCF-PAP-895629		Natural History Museum of Neuchatel
GBIFCH-BOL_LEPAA_0356	2013-063	CSCF-PAP-910698		Natural History Museum of Neuchatel
GBIFCH-BOL_LEPAA_0357	2013-056	CSCF-PAP-910699		Natural History Museum of Neuchatel
GBIFCH-BOL_LEPAA_0358	2013-047	CSCF-PAP-910676		Natural History Museum of Neuchatel
GBIFCH-BOL_LEPAA_0359	2013-052	CSCF-PAP-910644		Natural History Museum of Neuchatel
GBIFCH-BOL_LEPAA_0360	95883	CSCF-PAP-898801		Natural History Museum of Neuchatel
GBIFCH-BOL_LEPAA_0361	2013-016	CSCF-PAP-910646		Natural History Museum of Neuchatel
GBIFCH-BOL_LEPAA_0362	2013-031	CSCF-PAP-910704		Natural History Museum of Neuchatel
GBIFCH-BOL_LEPAA_0363	2013-003	CSCF-PAP-910678		Natural History Museum of Neuchatel
GBIFCH-BOL_LEPAA_0364	95753	CSCF-PAP-898742		Natural History Museum of Neuchatel
GBIFCH-BOL_LEPAA_0365	2013-081	CSCF-PAP-910697		Natural History Museum of Neuchatel
GBIFCH-BOL_LEPAA_0366	2013-004	CSCF-PAP-910679		Natural History Museum of Neuchatel
GBIFCH-BOL_LEPAA_0367	2013-082	CSCF-PAP-910692		Natural History Museum of Neuchatel
GBIFCH-BOL_LEPAA_0368	2013-029	CSCF-PAP-910702		Natural History Museum of Neuchatel
GBIFCH-BOL_LEPAA_0369	2013-085	CSCF-PAP-910674		Natural History Museum of Neuchatel
GBIFCH-BOL_LEPAA_0370	2013-057	CSCF-PAP-910680		Natural History Museum of Neuchatel
GBIFCH-BOL_LEPAA_0371	93305	CSCF-PAP-898401		Natural History Museum of Neuchatel
GBIFCH-BOL_LEPAA_0372	95884	CSCF-PAP-898802		Natural History Museum of Neuchatel
GBIFCH-BOL_LEPAA_0373	95878	CSCF-PAP-898796		Natural History Museum of Neuchatel
GBIFCH-BOL_LEPAA_0374	2013-094	CSCF-PAP-910689		Natural History Museum of Neuchatel
GBIFCH-BOL_LEPAA_0375	2013-075	CSCF-PAP-910658		Natural History Museum of Neuchatel
GBIFCH-BOL_LEPAA_0376	2013-044	CSCF-PAP-910645		Natural History Museum of Neuchatel
GBIFCH-BOL_LEPAA_0377	2013-067	CSCF-PAP-910703		Natural History Museum of Neuchatel
GBIFCH-BOL_LEPAA_0378	95767	CSCF-PAP-898746		Natural History Museum of Neuchatel
GBIFCH-BOL_LEPAA_0379	95895	CSCF-PAP-898811		Natural History Museum of Neuchatel
GBIFCH-BOL_LEPAA_0380	95912	CSCF-PAP-898828		Natural History Museum of Neuchatel
GBIFCH-BOL_LEPAA_0381	2013-060	CSCF-PAP-910667		Natural History Museum of Neuchatel
GBIFCH-BOL_LEPAA_0382		CSCF-PAP-906300		Natural History Museum of Neuchatel
GBIFCH-BOL_LEPAA_0383		CSCF-PAP-893647		Natural History Museum of Neuchatel
GBIFCH-BOL_LEPAA_0384		CSCF-PAP-894359		Natural History Museum of Neuchatel
GBIFCH-BOL_LEPAA_0385		CSCF-PAP-912812		Natural History Museum of Neuchatel
GBIFCH-BOL_LEPAA_0386		CSCF-PAP-912811		Natural History Museum of Neuchatel
GBIFCH-BOL_LEPAA_0387		CSCF-PAP-912650		Natural History Museum of Neuchatel
GBIFCH-BOL_LEPAA_0388		CSCF-PAP-912651		Natural History Museum of Neuchatel
GBIFCH-BOL_LEPAA_0389		CSCF-PAP-912665		Natural History Museum of Neuchatel
GBIFCH-BOL_LEPAA_0390		CSCF-PAP-913116		Natural History Museum of Neuchatel
GBIFCH-BOL_LEPAA_0391		CSCF-PAP-912810		Natural History Museum of Neuchatel
GBIFCH-BOL_LEPAA_0392		CSCF-PAP-912808		Natural History Museum of Neuchatel
GBIFCH-BOL_LEPAA_0393		CSCF-PAP-913080		Natural History Museum of Neuchatel
GBIFCH-BOL_LEPAA_0394		CSCF-PAP-912993		Natural History Museum of Neuchatel
GBIFCH-BOL_LEPAA_0395		CSCF-PAP-913001		Natural History Museum of Neuchatel
GBIFCH-BOL_LEPAA_0396		CSCF-PAP-913083		Natural History Museum of Neuchatel
GBIFCH-BOL_LEPAA_0397		CSCF-PAP-913082		Natural History Museum of Neuchatel
GBIFCH-BOL_LEPAA_0398		CSCF-PAP-912751		Natural History Museum of Neuchatel
GBIFCH-BOL_LEPAA_0399		CSCF-PAP-913246		Natural History Museum of Neuchatel
GBIFCH-BOL_LEPAA_0400		CSCF-PAP-913234		Natural History Museum of Neuchatel
GBIFCH-BOL_LEPAA_0401		CSCF-PAP-913241		Natural History Museum of Neuchatel
GBIFCH-BOL_LEPAA_0402		CSCF-PAP-912657		Natural History Museum of Neuchatel
GBIFCH-BOL_LEPAA_0403		CSCF-PAP-912656		Natural History Museum of Neuchatel
GBIFCH-BOL_LEPAA_0404		CSCF-PAP-912728		Natural History Museum of Neuchatel
GBIFCH-BOL_LEPAA_0405		CSCF-PAP-913004		Natural History Museum of Neuchatel
GBIFCH-BOL_LEPAA_0406		CSCF-PAP-913023		Natural History Museum of Neuchatel
GBIFCH-BOL_LEPAA_0407		CSCF-PAP-913220		Natural History Museum of Neuchatel
GBIFCH-BOL_LEPAA_0408		CSCF-PAP-912992		Natural History Museum of Neuchatel
GBIFCH-BOL_LEPAA_0409		CSCF-PAP-913260		Natural History Museum of Neuchatel
GBIFCH-BOL_LEPAA_0410		CSCF-PAP-912931		Natural History Museum of Neuchatel
GBIFCH-BOL_LEPAA_0411		CSCF-PAP-912799		Natural History Museum of Neuchatel
GBIFCH-BOL_LEPAA_0412		CSCF-PAP-913108		Natural History Museum of Neuchatel
GBIFCH-BOL_LEPAA_0413		CSCF-PAP-913194		Natural History Museum of Neuchatel
GBIFCH-BOL_LEPAA_0414		CSCF-PAP-913192		Natural History Museum of Neuchatel
GBIFCH-BOL_LEPAA_0415		CSCF-PAP-912844		Natural History Museum of Neuchatel
GBIFCH-BOL_LEPAA_0416		CSCF-PAP-913024		Natural History Museum of Neuchatel
GBIFCH-BOL_LEPAA_0417		CSCF-PAP-912828		Natural History Museum of Neuchatel
GBIFCH-BOL_LEPAA_0418		CSCF-PAP-912912		Natural History Museum of Neuchatel
GBIFCH-BOL_LEPAA_0419		CSCF-PAP-913070		Natural History Museum of Neuchatel
GBIFCH-BOL_LEPAA_0420		CSCF-PAP-912664		Natural History Museum of Neuchatel
GBIFCH-BOL_LEPAA_0421		CSCF-PAP-913126		Natural History Museum of Neuchatel
GBIFCH-BOL_LEPAA_0422		CSCF-PAP-913153		Natural History Museum of Neuchatel
GBIFCH-BOL_LEPAA_0423		CSCF-PAP-913169		Natural History Museum of Neuchatel
GBIFCH-BOL_LEPAA_0424		CSCF-PAP-912726		Natural History Museum of Neuchatel
GBIFCH-BOL_LEPAA_0425		CSCF-PAP-912978		Natural History Museum of Neuchatel
GBIFCH-BOL_LEPAA_0426		CSCF-PAP-913013		Natural History Museum of Neuchatel
GBIFCH-BOL_LEPAA_0427		CSCF-PAP-913181		Natural History Museum of Neuchatel
GBIFCH-BOL_LEPAA_0428		CSCF-PAP-913119		Natural History Museum of Neuchatel
GBIFCH-BOL_LEPAA_0429		CSCF-PAP-913040		Natural History Museum of Neuchatel
GBIFCH-BOL_LEPAA_0430		CSCF-PAP-912777		Natural History Museum of Neuchatel
GBIFCH-BOL_LEPAA_0431		CSCF-PAP-913228		Natural History Museum of Neuchatel
GBIFCH-BOL_LEPAA_0432		CSCF-PAP-913224		Natural History Museum of Neuchatel
GBIFCH-BOL_LEPAA_0433		CSCF-PAP-913015		Natural History Museum of Neuchatel
GBIFCH-BOL_LEPAA_0434		CSCF-PAP-913047		Natural History Museum of Neuchatel
GBIFCH-BOL_LEPAA_0435		CSCF-PAP-912672		Natural History Museum of Neuchatel
GBIFCH-BOL_LEPAA_0436		CSCF-PAP-912998		Natural History Museum of Neuchatel
GBIFCH-BOL_LEPAA_0437		CSCF-PAP-913050		Natural History Museum of Neuchatel
GBIFCH-BOL_LEPAA_0438		CSCF-PAP-913022		Natural History Museum of Neuchatel
GBIFCH-BOL_LEPAA_0439		CSCF-PAP-912943		Natural History Museum of Neuchatel
GBIFCH-BOL_LEPAA_0440		CSCF-PAP-912856		Natural History Museum of Neuchatel
GBIFCH-BOL_LEPAA_0441		CSCF-PAP-912797		Natural History Museum of Neuchatel
GBIFCH-BOL_LEPAA_0442		CSCF-PAP-913072		Natural History Museum of Neuchatel
GBIFCH-BOL_LEPAA_0443		CSCF-PAP-912862		Natural History Museum of Neuchatel
GBIFCH-BOL_LEPAA_0444		CSCF-PAP-912804		Natural History Museum of Neuchatel
GBIFCH-BOL_LEPAA_0445		CSCF-PAP-1012371		Natural History Museum of Neuchatel
GBIFCH-BOL_LEPAA_0446		CSCF-PAP-912705		Natural History Museum of Neuchatel
GBIFCH-BOL_LEPAA_0447		CSCF-PAP-912891		Natural History Museum of Neuchatel
GBIFCH-BOL_LEPAA_0448		CSCF-PAP-913129		Natural History Museum of Neuchatel
GBIFCH-BOL_LEPAA_0449		CSCF-PAP-913010		Natural History Museum of Neuchatel
GBIFCH-BOL_LEPAA_0450		CSCF-PAP-912916		Natural History Museum of Neuchatel
GBIFCH-BOL_LEPAA_0451		CSCF-PAP-912685		Natural History Museum of Neuchatel
GBIFCH-BOL_LEPAA_0452		CSCF-PAP-913053		Natural History Museum of Neuchatel
GBIFCH-BOL_LEPAA_0453		CSCF-PAP-913205		Natural History Museum of Neuchatel
GBIFCH-BOL_LEPAA_0454		CSCF-PAP-912693		Natural History Museum of Neuchatel
GBIFCH-BOL_LEPAA_0455		CSCF-PAP-913081		Natural History Museum of Neuchatel
GBIFCH-BOL_LEPAA_0456		CSCF-PAP-913027		Natural History Museum of Neuchatel
GBIFCH-BOL_LEPAA_0457		CSCF-PAP-913186		Natural History Museum of Neuchatel
GBIFCH-BOL_LEPAA_0458		CSCF-PAP-912925		Natural History Museum of Neuchatel
GBIFCH-BOL_LEPAA_0459		CSCF-PAP-913131		Natural History Museum of Neuchatel
GBIFCH-BOL_LEPAA_0460		CSCF-PAP-913134		Natural History Museum of Neuchatel
GBIFCH-BOL_LEPAA_0461		CSCF-PAP-913213		Natural History Museum of Neuchatel
GBIFCH-BOL_LEPAA_0462		CSCF-PAP-913232		Natural History Museum of Neuchatel
GBIFCH-BOL_LEPAA_0463		CSCF-PAP-913074		Natural History Museum of Neuchatel
GBIFCH-BOL_LEPAA_0464		CSCF-PAP-912968		Natural History Museum of Neuchatel
GBIFCH-BOL_LEPAA_0465		CSCF-PAP-913038		Natural History Museum of Neuchatel
GBIFCH-BOL_LEPAA_0466		CSCF-PAP-913030		Natural History Museum of Neuchatel
GBIFCH-BOL_LEPAA_0467		CSCF-PAP-913196		Natural History Museum of Neuchatel
GBIFCH-BOL_LEPAA_0468		CSCF-PAP-913199		Natural History Museum of Neuchatel
GBIFCH-BOL_LEPAA_0469		CSCF-PAP-912669		Natural History Museum of Neuchatel
GBIFCH-BOL_LEPAA_0470		CSCF-PAP-912675		Natural History Museum of Neuchatel
GBIFCH-BOL_LEPAA_0471		CSCF-PAP-913063		Natural History Museum of Neuchatel
GBIFCH-BOL_LEPAA_0472		CSCF-PAP-913044		Natural History Museum of Neuchatel
GBIFCH-BOL_LEPAA_0473		CSCF-PAP-913120		Natural History Museum of Neuchatel
GBIFCH-BOL_LEPAA_0474		CSCF-PAP-912774		Natural History Museum of Neuchatel
GBIFCH-BOL_LEPAA_0475		CSCF-PAP-912781		Natural History Museum of Neuchatel
GBIFCH-BOL_LEPAA_0476		CSCF-PAP-912778		Natural History Museum of Neuchatel
GBIFCH-BOL_LEPAA_0477		CSCF-PAP-912923		Natural History Museum of Neuchatel
GBIFCH-BOL_LEPAA_0478		CSCF-PAP-912677		Natural History Museum of Neuchatel
GBIFCH-BOL_LEPAA_0479		CSCF-PAP-912683		Natural History Museum of Neuchatel
GBIFCH-BOL_LEPAA_0480		CSCF-PAP-912939		Natural History Museum of Neuchatel
GBIFCH-BOL_LEPAA_0481		CSCF-PAP-912724		Natural History Museum of Neuchatel
GBIFCH-BOL_LEPAA_0482		CSCF-PAP-912719		Natural History Museum of Neuchatel
GBIFCH-BOL_LEPAA_0483		CSCF-PAP-912717		Natural History Museum of Neuchatel
GBIFCH-BOL_LEPAA_0484		CSCF-PAP-912722		Natural History Museum of Neuchatel
GBIFCH-BOL_LEPAA_0485		CSCF-PAP-912699		Natural History Museum of Neuchatel
GBIFCH-BOL_LEPAA_0486		CSCF-PAP-912920		Natural History Museum of Neuchatel
GBIFCH-BOL_LEPAA_0487		CSCF-PAP-913005		Natural History Museum of Neuchatel
GBIFCH-BOL_LEPAA_0488		CSCF-PAP-913007		Natural History Museum of Neuchatel
GBIFCH-BOL_LEPAA_0489		CSCF-PAP-912977		Natural History Museum of Neuchatel
GBIFCH-BOL_LEPAA_0490		CSCF-PAP-912949		Natural History Museum of Neuchatel
GBIFCH-BOL_LEPAA_0491		CSCF-PAP-935369		Natural History Museum of Neuchatel
GBIFCH-BOL_LEPAA_0492		CSCF-PAP-912945		Natural History Museum of Neuchatel
GBIFCH-BOL_LEPAA_0493		CSCF-PAP-912841		Natural History Museum of Neuchatel
GBIFCH-BOL_LEPAA_0494		CSCF-PAP-912888		Natural History Museum of Neuchatel
GBIFCH-BOL_LEPAA_0495		CSCF-PAP-912818		Natural History Museum of Neuchatel
GBIFCH-BOL_LEPAA_0496		CSCF-PAP-912878		Natural History Museum of Neuchatel
GBIFCH-BOL_LEPAA_0497		CSCF-PAP-912830		Natural History Museum of Neuchatel
GBIFCH-BOL_LEPAA_0498		CSCF-PAP-912795		Natural History Museum of Neuchatel
GBIFCH-BOL_LEPAA_0499		CSCF-PAP-912826		Natural History Museum of Neuchatel
GBIFCH-BOL_LEPAA_0500		CSCF-PAP-912861		Natural History Museum of Neuchatel
GBIFCH-BOL_LEPAA_0501		CSCF-PAP-912866		Natural History Museum of Neuchatel
GBIFCH-BOL_LEPAA_0502		CSCF-PAP-912836		Natural History Museum of Neuchatel
GBIFCH-BOL_LEPAA_0503		CSCF-PAP-912872		Natural History Museum of Neuchatel
GBIFCH-BOL_LEPAA_0504		CSCF-PAP-912885		Natural History Museum of Neuchatel
GBIFCH-BOL_LEPAA_0505		CSCF-PAP-912905		Natural History Museum of Neuchatel
GBIFCH-BOL_LEPAA_0506		CSCF-PAP-912851		Natural History Museum of Neuchatel
GBIFCH-BOL_LEPAA_0507		CSCF-PAP-912739		Natural History Museum of Neuchatel
GBIFCH-BOL_LEPAA_0508		CSCF-PAP-912955		Natural History Museum of Neuchatel
GBIFCH-BOL_LEPAA_0509		CSCF-PAP-912730		Natural History Museum of Neuchatel
GBIFCH-BOL_LEPAA_0510		CSCF-PAP-913100		Natural History Museum of Neuchatel
GBIFCH-BOL_LEPAA_0511		CSCF-PAP-913112		Natural History Museum of Neuchatel
GBIFCH-BOL_LEPAA_0512		CSCF-PAP-912971		Natural History Museum of Neuchatel
GBIFCH-BOL_LEPAA_0513		CSCF-PAP-912961		Natural History Museum of Neuchatel
GBIFCH-BOL_LEPAA_0514		CSCF-PAP-913096		Natural History Museum of Neuchatel
GBIFCH-BOL_LEPAA_0515		CSCF-PAP-912967		Natural History Museum of Neuchatel
GBIFCH-BOL_LEPAA_0516		CSCF-PAP-913092		Natural History Museum of Neuchatel
GBIFCH-BOL_LEPAA_0517		CSCF-PAP-936240		Natural History Museum of Neuchatel
GBIFCH-BOL_LEPAA_0518		CSCF-PAP-913076		Natural History Museum of Neuchatel
GBIFCH-BOL_LEPAA_0519		CSCF-PAP-913089		Natural History Museum of Neuchatel
GBIFCH-BOL_LEPAA_0520		CSCF-PAP-913103		Natural History Museum of Neuchatel
GBIFCH-BOL_LEPAA_0521		CSCF-PAP-912786		Natural History Museum of Neuchatel
GBIFCH-BOL_LEPAA_0522		CSCF-PAP-912732		Natural History Museum of Neuchatel
GBIFCH-BOL_LEPAA_0523		CSCF-PAP-912915		Natural History Museum of Neuchatel
GBIFCH-BOL_LEPAA_0524		CSCF-PAP-912924		Natural History Museum of Neuchatel
GBIFCH-BOL_LEPAA_0525		CSCF-PAP-913214		Natural History Museum of Neuchatel
GBIFCH-BOL_LEPAA_0526		CSCF-PAP-913227		Natural History Museum of Neuchatel
GBIFCH-BOL_LEPAA_0527		CSCF-PAP-912723		Natural History Museum of Neuchatel
GBIFCH-BOL_LEPAA_0528		CSCF-PAP-913009		Natural History Museum of Neuchatel
GBIFCH-BOL_LEPAA_0529		CSCF-PAP-912758		Natural History Museum of Neuchatel
GBIFCH-BOL_LEPAA_0530		CSCF-PAP-913071		Natural History Museum of Neuchatel
GBIFCH-BOL_LEPAA_0531		CSCF-PAP-913137		Natural History Museum of Neuchatel
GBIFCH-BOL_LEPAA_0532		CSCF-PAP-912966		Natural History Museum of Neuchatel
GBIFCH-BOL_LEPAA_0533		CSCF-PAP-913151		Natural History Museum of Neuchatel
GBIFCH-BOL_LEPAA_0534		CSCF-PAP-913221		Natural History Museum of Neuchatel
GBIFCH-BOL_LEPAA_0535		CSCF-PAP-912770		Natural History Museum of Neuchatel
GBIFCH-BOL_LEPAA_0536		CSCF-PAP-913077		Natural History Museum of Neuchatel
GBIFCH-BOL_LEPAA_0537		CSCF-PAP-913086		Natural History Museum of Neuchatel
GBIFCH-BOL_LEPAA_0538		CSCF-PAP-913148		Natural History Museum of Neuchatel
GBIFCH-BOL_LEPAA_0539		CSCF-PAP-912684		Natural History Museum of Neuchatel
GBIFCH-BOL_LEPAA_0540		CSCF-PAP-912985		Natural History Museum of Neuchatel
GBIFCH-BOL_LEPAA_0541		CSCF-PAP-913002		Natural History Museum of Neuchatel
GBIFCH-BOL_LEPAA_0542		CSCF-PAP-913006		Natural History Museum of Neuchatel
GBIFCH-BOL_LEPAA_0543		CSCF-PAP-912956		Natural History Museum of Neuchatel
GBIFCH-BOL_LEPAA_0544		CSCF-PAP-913185		Natural History Museum of Neuchatel
GBIFCH-BOL_LEPAA_0545		CSCF-PAP-913184		Natural History Museum of Neuchatel
GBIFCH-BOL_LEPAA_0546		CSCF-PAP-912908		Natural History Museum of Neuchatel
GBIFCH-BOL_LEPAA_0547		CSCF-PAP-913177		Natural History Museum of Neuchatel
GBIFCH-BOL_LEPAA_0548		CSCF-PAP-913200		Natural History Museum of Neuchatel
GBIFCH-BOL_LEPAA_0549		CSCF-PAP-913219		Natural History Museum of Neuchatel
GBIFCH-BOL_LEPAA_0550		CSCF-PAP-913212		Natural History Museum of Neuchatel
GBIFCH-BOL_LEPAA_0551		CSCF-PAP-912711		Natural History Museum of Neuchatel
GBIFCH-BOL_LEPAA_0552		CSCF-PAP-912886		Natural History Museum of Neuchatel
GBIFCH-BOL_LEPAA_0553	122717	CSCF-PAP-978258		Natural History Museum of Neuchatel
GBIFCH-BOL_LEPAA_0554		CSCF-PAP-756057		Natural History Museum of Neuchatel
GBIFCH-BOL_LEPAA_0555		CSCF-PAP-912674		Natural History Museum of Neuchatel
GBIFCH-BOL_LEPAA_0556		CSCF-PAP-912776		Natural History Museum of Neuchatel
GBIFCH-BOL_LEPAA_0557		CSCF-PAP-912952		Natural History Museum of Neuchatel
GBIFCH-BOL_LEPAA_0558		CSCF-PAP-912950		Natural History Museum of Neuchatel
GBIFCH-BOL_LEPAA_0559		CSCF-PAP-913179		Natural History Museum of Neuchatel
GBIFCH-BOL_LEPAA_0560		CSCF-PAP-913095		Natural History Museum of Neuchatel
GBIFCH-BOL_LEPAA_0561		CSCF-PAP-912969		Natural History Museum of Neuchatel
GBIFCH-BOL_LEPAA_0562		CSCF-PAP-913259		Natural History Museum of Neuchatel
GBIFCH-BOL_LEPAA_0563		CSCF-PAP-912921		Natural History Museum of Neuchatel
GBIFCH-BOL_LEPAA_0564		CSCF-PAP-912965		Natural History Museum of Neuchatel
GBIFCH-BOL_LEPAA_0565		CSCF-PAP-905828		Natural History Museum of Neuchatel
GBIFCH-BOL_LEPAA_0566		CSCF-PAP-909101		Natural History Museum of Neuchatel
GBIFCH-BOL_LEPAA_0567		CSCF-PAP-905833		Natural History Museum of Neuchatel
GBIFCH-BOL_LEPAA_0568		CSCF-PAP-905824		Natural History Museum of Neuchatel
GBIFCH-BOL_LEPAA_0569		CSCF-PAP-905837		Natural History Museum of Neuchatel
GBIFCH-BOL_LEPAA_0570		CSCF-PAP-905836		Natural History Museum of Neuchatel
GBIFCH-BOL_LEPAA_0571		CSCF-PAP-905815		Natural History Museum of Neuchatel
GBIFCH-BOL_LEPAA_0572		CSCF-PAP-905812		Natural History Museum of Neuchatel
GBIFCH-BOL_LEPAA_0573		CSCF-PAP-905805		Natural History Museum of Neuchatel
GBIFCH-BOL_LEPAA_0574		CSCF-PAP-905821		Natural History Museum of Neuchatel
GBIFCH-BOL_LEPAA_0575		CSCF-PAP-905838		Natural History Museum of Neuchatel
GBIFCH-BOL_LEPAA_0576		CSCF-PAP-905795		Natural History Museum of Neuchatel
GBIFCH-BOL_LEPAA_0577		CSCF-PAP-905794		Natural History Museum of Neuchatel
GBIFCH-BOL_LEPAA_0578		CSCF-PAP-905793		Natural History Museum of Neuchatel
GBIFCH-BOL_LEPAA_0579		CSCF-PAP-905791		Natural History Museum of Neuchatel
GBIFCH-BOL_LEPAA_0580		CSCF-PAP-905785		Natural History Museum of Neuchatel
GBIFCH-BOL_LEPAA_0581		CSCF-PAP-905786		Natural History Museum of Neuchatel
GBIFCH-BOL_LEPAA_0582		CSCF-PAP-905787		Natural History Museum of Neuchatel
GBIFCH-BOL_LEPAA_0583		CSCF-PAP-905783		Natural History Museum of Neuchatel
GBIFCH-BOL_LEPAA_0584		CSCF-PAP-905784		Natural History Museum of Neuchatel
GBIFCH-BOL_LEPAA_0585		CSCF-PAP-905781		Natural History Museum of Neuchatel
GBIFCH-BOL_LEPAA_0586		CSCF-PAP-961790		Natural History Museum of Neuchatel
GBIFCH-BOL_LEPAA_0587		CSCF-PAP-962500		Natural History Museum of Neuchatel
GBIFCH-BOL_LEPAA_0588		CSCF-PAP-961788		Natural History Museum of Neuchatel
GBIFCH-BOL_LEPAA_0589		CSCF-PAP-961786		Natural History Museum of Neuchatel
GBIFCH-BOL_LEPAA_0590		CSCF-PAP-961785		Natural History Museum of Neuchatel
GBIFCH-BOL_LEPAA_0591		CSCF-PAP-961794		Natural History Museum of Neuchatel
GBIFCH-BOL_LEPAA_0592		CSCF-PAP-962499		Natural History Museum of Neuchatel
GBIFCH-BOL_LEPAA_0593		CSCF-PAP-963277		Natural History Museum of Neuchatel
GBIFCH-BOL_LEPAA_0594		CSCF-PAP-963255		Natural History Museum of Neuchatel
GBIFCH-BOL_LEPAA_0595		CSCF-PAP-963264		Natural History Museum of Neuchatel
GBIFCH-BOL_LEPAA_0596		CSCF-PAP-963282		Natural History Museum of Neuchatel
GBIFCH-BOL_LEPAA_0597		CSCF-PAP-963285		Natural History Museum of Neuchatel
GBIFCH-BOL_LEPAA_0598		CSCF-PAP-905921		Natural History Museum of Neuchatel
GBIFCH-BOL_LEPAA_0599		CSCF-PAP-622543		Natural History Museum of Neuchatel
GBIFCH-BOL_LEPAA_0600		CSCF-PAP-622189		Natural History Museum of Neuchatel
GBIFCH-BOL_LEPAA_0601		CSCF-PAP-692714		Natural History Museum of Neuchatel
GBIFCH-BOL_LEPAA_0602		CSCF-PAP-692713		Natural History Museum of Neuchatel
GBIFCH-BOL_LEPAA_0603		CSCF-PAP-692715		Natural History Museum of Neuchatel
GBIFCH-BOL_LEPAA_0604		CSCF-PAP-618214		Natural History Museum of Neuchatel
GBIFCH-BOL_LEPAA_0605		CSCF-PAP-618408		Natural History Museum of Neuchatel
GBIFCH-BOL_LEPAA_0606		CSCF-PAP-486757		Natural History Museum of Neuchatel
GBIFCH-BOL_LEPAA_0607		CSCF-PAP-622625		Natural History Museum of Neuchatel
GBIFCH-BOL_LEPAA_0608		CSCF-PAP-975978		Natural History Museum of Neuchatel
GBIFCH-BOL_LEPAA_0609		CSCF-PAP-843690		Natural History Museum of Neuchatel
GBIFCH-BOL_LEPAA_0610		CSCF-PAP-693979		Natural History Museum of Neuchatel
GBIFCH-BOL_LEPAA_0611		CSCF-PAP-906348		Natural History Museum of Neuchatel
GBIFCH-BOL_LEPAA_0613		CSCF-PAP-893644		Natural History Museum of Neuchatel
GBIFCH-BOL_LEPAA_0614		CSCF-PAP-890744		Natural History Museum of Neuchatel
GBIFCH-BOL_LEPAA_0615		CSCF-PAP-913261		Natural History Museum of Neuchatel
GBIFCH-BOL_LEPAA_0616		CSCF-PAP-913084		Natural History Museum of Neuchatel
GBIFCH-BOL_LEPAA_0617		CSCF-PAP-912666		Natural History Museum of Neuchatel
GBIFCH-BOL_LEPAA_0618		CSCF-PAP-893893		Natural History Museum of Neuchatel
GBIFCH-BOL_LEPAA_0619		CSCF-PAP-912679		Natural History Museum of Neuchatel
GBIFCH-BOL_LEPAA_0620		CSCF-PAP-912710		Natural History Museum of Neuchatel
GBIFCH-BOL_LEPAA_0621		CSCF-PAP-912780		Natural History Museum of Neuchatel
GBIFCH-BOL_LEPAA_0622		CSCF-PAP-912784		Natural History Museum of Neuchatel
GBIFCH-BOL_LEPAA_0623		CSCF-PAP-912919		Natural History Museum of Neuchatel
GBIFCH-BOL_LEPAA_0624		CSCF-PAP-912917		Natural History Museum of Neuchatel
GBIFCH-BOL_LEPAA_0625		CSCF-PAP-912951		Natural History Museum of Neuchatel
GBIFCH-BOL_LEPAA_0626		CSCF-PAP-912953		Natural History Museum of Neuchatel
GBIFCH-BOL_LEPAA_0627		CSCF-PAP-912954		Natural History Museum of Neuchatel
GBIFCH-BOL_LEPAA_0628		CSCF-PAP-905820		Natural History Museum of Neuchatel
GBIFCH-BOL_LEPAA_0629		CSCF-PAP-913254		Natural History Museum of Neuchatel
GBIFCH-BOL_LEPAA_0630		CSCF-PAP-912959		Natural History Museum of Neuchatel
GBIFCH-BOL_LEPAA_0631		CSCF-PAP-913078		Natural History Museum of Neuchatel
GBIFCH-BOL_LEPAA_0632		CSCF-PAP-913132		Natural History Museum of Neuchatel
GBIFCH-BOL_LEPAA_0633		CSCF-PAP-913133		Natural History Museum of Neuchatel
GBIFCH-BOL_LEPAA_0634		CSCF-PAP-912962		Natural History Museum of Neuchatel
GBIFCH-BOL_LEPAA_0635		CSCF-PAP-912999		Natural History Museum of Neuchatel
GBIFCH-BOL_LEPAA_0636		CSCF-PAP-913180		Natural History Museum of Neuchatel
GBIFCH-BOL_LEPAA_0637		CSCF-PAP-912691		Natural History Museum of Neuchatel
GBIFCH-BOL_LEPAA_0638		CSCF-PAP-913178		Natural History Museum of Neuchatel
GBIFCH-BOL_LEPAA_0639		CSCF-PAP-913034		Natural History Museum of Neuchatel
GBIFCH-BOL_LEPAA_0640		CSCF-PAP-913094		Natural History Museum of Neuchatel
GBIFCH-BOL_LEPAA_0641		CSCF-PAP-913191		Natural History Museum of Neuchatel
GBIFCH-BOL_LEPAA_0642		CSCF-PAP-912721		Natural History Museum of Neuchatel
GBIFCH-BOL_LEPAA_0643		CSCF-PAP-913145		Natural History Museum of Neuchatel
GBIFCH-BOL_LEPAA_0644		CSCF-PAP-890675		Natural History Museum of Neuchatel
GBIFCH-BOL_LEPAA_0645		CSCF-PAP-913245		Natural History Museum of Neuchatel
GBIFCH-BOL_LEPAA_0646		CSCF-PAP-912864		Natural History Museum of Neuchatel
GBIFCH-BOL_LEPAA_0647		CSCF-PAP-975979		Natural History Museum of Neuchatel
GBIFCH-BOL_LEPAA_0648		CSCF-PAP-744411		Natural History Museum of Neuchatel
GBIFCH-BOL_LEPAA_0649		CSCF-PAP-618459		Natural History Museum of Neuchatel
GBIFCH-BOL_LEPAA_0650		CSCF-PAP-891030		Natural History Museum of Neuchatel
GBIFCH-BOL_LEPAA_0651		CSCF-PAP-624457		Natural History Museum of Neuchatel
GBIFCH-BOL_LEPAA_0652		CSCF-PAP-624480		Natural History Museum of Neuchatel
GBIFCH-BOL_LEPAA_0653		CSCF-PAP-913174		Natural History Museum of Neuchatel
GBIFCH-BOL_LEPAA_0654		CSCF-PAP-913016		Natural History Museum of Neuchatel
GBIFCH-BOL_LEPAA_0655		CSCF-PAP-912974		Natural History Museum of Neuchatel
GBIFCH-BOL_LEPAA_0656		CSCF-PAP-913170		Natural History Museum of Neuchatel
GBIFCH-BOL_LEPAA_0657		CSCF-PAP-962436		Natural History Museum of Neuchatel
GBIFCH-BOL_LEPAA_0658		CSCF-PAP-962232		Natural History Museum of Neuchatel
GBIFCH-BOL_LEPAA_0659		CSCF-PAP-962226		Natural History Museum of Neuchatel
GBIFCH-BOL_LEPAA_0660		CSCF-PAP-962935		Natural History Museum of Neuchatel
GBIFCH-BOL_LEPAA_0661		CSCF-PAP-962214		Natural History Museum of Neuchatel
GBIFCH-BOL_LEPAA_0662		CSCF-PAP-962963		Natural History Museum of Neuchatel
GBIFCH-BOL_LEPAA_0663		CSCF-PAP-961944		Natural History Museum of Neuchatel
GBIFCH-BOL_LEPAA_0664		CSCF-PAP-962805		Natural History Museum of Neuchatel
GBIFCH-BOL_LEPAA_0665		CSCF-PAP-962259		Natural History Museum of Neuchatel
GBIFCH-BOL_LEPAA_0666		CSCF-PAP-962601		Natural History Museum of Neuchatel
GBIFCH-BOL_LEPAA_0667		CSCF-PAP-962304		Natural History Museum of Neuchatel
GBIFCH-BOL_LEPAA_0668		CSCF-PAP-962335		Natural History Museum of Neuchatel
GBIFCH-BOL_LEPAA_0669		CSCF-PAP-963139		Natural History Museum of Neuchatel
GBIFCH-BOL_LEPAA_0670		CSCF-PAP-843716		Natural History Museum of Neuchatel
GBIFCH-BOL_LEPAA_0671		CSCF-PAP-975980		Natural History Museum of Neuchatel
GBIFCH-BOL_LEPAA_0672		CSCF-PAP-490359		Natural History Museum of Neuchatel
GBIFCH-BOL_LEPAA_0673		CSCF-PAP-782282		Natural History Museum of Neuchatel
GBIFCH-BOL_LEPAA_0674		CSCF-PAP-490350		Natural History Museum of Neuchatel
GBIFCH-BOL_LEPAA_0675		CSCF-PAP-490516		Natural History Museum of Neuchatel
GBIFCH-BOL_LEPAA_0676		CSCF-PAP-975984		Natural History Museum of Neuchatel
GBIFCH-BOL_LEPAA_0677		CSCF-PAP-622746		Natural History Museum of Neuchatel
GBIFCH-BOL_LEPAA_0678		CSCF-PAP-757685		Natural History Museum of Neuchatel
GBIFCH-BOL_LEPAA_0679		CSCF-PAP-975981		Natural History Museum of Neuchatel
GBIFCH-BOL_LEPAA_0680		CSCF-PAP-975982		Natural History Museum of Neuchatel
GBIFCH-BOL_LEPAA_0681		CSCF-PAP-975983		Natural History Museum of Neuchatel
GBIFCH-BOL_LEPAA_0682		CSCF-PAP-962095		Natural History Museum of Neuchatel
GBIFCH-BOL_LEPAA_0683		CSCF-PAP-490172		Natural History Museum of Neuchatel
GBIFCH-BOL_LEPAA_0684		CSCF-PAP-490404		Natural History Museum of Neuchatel
GBIFCH-BOL_LEPAA_0685		CSCF-PAP-490150		Natural History Museum of Neuchatel
GBIFCH-BOL_LEPAA_0686		CSCF-PAP-975986		Natural History Museum of Neuchatel
GBIFCH-BOL_LEPAA_0687		CSCF-PAP-975987		Natural History Museum of Neuchatel
GBIFCH-BOL_LEPAA_0688		CSCF-PAP-963096		Natural History Museum of Neuchatel
GBIFCH-BOL_LEPAA_0689		CSCF-PAP-962261		Natural History Museum of Neuchatel
GBIFCH-BOL_LEPAA_0690		CSCF-PAP-962983		Natural History Museum of Neuchatel
GBIFCH-BOL_LEPAA_0691		CSCF-PAP-963081		Natural History Museum of Neuchatel
GBIFCH-BOL_LEPAA_0692		CSCF-PAP-962253		Natural History Museum of Neuchatel
GBIFCH-BOL_LEPAA_0693		CSCF-PAP-962012		Natural History Museum of Neuchatel
GBIFCH-BOL_LEPAA_0694		CSCF-PAP-962588		Natural History Museum of Neuchatel
GBIFCH-BOL_LEPAA_0695		CSCF-PAP-961946		Natural History Museum of Neuchatel
GBIFCH-BOL_LEPAA_0696		CSCF-PAP-962031		Natural History Museum of Neuchatel
GBIFCH-BOL_LEPAA_0697		CSCF-PAP-962569		Natural History Museum of Neuchatel
GBIFCH-BOL_LEPAA_0698		CSCF-PAP-962026		Natural History Museum of Neuchatel
GBIFCH-BOL_LEPAA_0699		CSCF-PAP-962745		Natural History Museum of Neuchatel
GBIFCH-BOL_LEPAA_0700		CSCF-PAP-962564		Natural History Museum of Neuchatel
GBIFCH-BOL_LEPAA_0701		CSCF-PAP-962478		Natural History Museum of Neuchatel
GBIFCH-BOL_LEPAA_0702		CSCF-PAP-963141		Natural History Museum of Neuchatel
GBIFCH-BOL_LEPAA_0703		CSCF-PAP-963142		Natural History Museum of Neuchatel
GBIFCH-BOL_LEPAA_0704		CSCF-PAP-963088		Natural History Museum of Neuchatel
GBIFCH-BOL_LEPAA_0705		CSCF-PAP-962581		Natural History Museum of Neuchatel
GBIFCH-BOL_LEPAA_0706		CSCF-PAP-962576		Natural History Museum of Neuchatel
GBIFCH-BOL_LEPAA_0707		CSCF-PAP-963143		Natural History Museum of Neuchatel
GBIFCH-BOL_LEPAA_0708		CSCF-PAP-962393		Natural History Museum of Neuchatel
GBIFCH-BOL_LEPAA_0709		CSCF-PAP-962764		Natural History Museum of Neuchatel
GBIFCH-BOL_LEPAA_0710		CSCF-PAP-962438		Natural History Museum of Neuchatel
GBIFCH-BOL_LEPAA_0711		CSCF-PAP-962829		Natural History Museum of Neuchatel
GBIFCH-BOL_LEPAA_0712		CSCF-PAP-962463		Natural History Museum of Neuchatel
GBIFCH-BOL_LEPAA_0713		CSCF-PAP-962301		Natural History Museum of Neuchatel
GBIFCH-BOL_LEPAA_0714		CSCF-PAP-963122		Natural History Museum of Neuchatel
GBIFCH-BOL_LEPAA_0715		CSCF-PAP-962457		Natural History Museum of Neuchatel
GBIFCH-BOL_LEPAA_0716		CSCF-PAP-962753		Natural History Museum of Neuchatel
GBIFCH-BOL_LEPAA_0717		CSCF-PAP-962065		Natural History Museum of Neuchatel
GBIFCH-BOL_LEPAA_0718		CSCF-PAP-962068		Natural History Museum of Neuchatel
GBIFCH-BOL_LEPAA_0719		CSCF-PAP-962837		Natural History Museum of Neuchatel
GBIFCH-BOL_LEPAA_0720		CSCF-PAP-962090		Natural History Museum of Neuchatel
GBIFCH-BOL_LEPAA_0721		CSCF-PAP-962061		Natural History Museum of Neuchatel
GBIFCH-BOL_LEPAA_0722		CSCF-PAP-962025		Natural History Museum of Neuchatel
GBIFCH-BOL_LEPAA_0723		CSCF-PAP-962573		Natural History Museum of Neuchatel
GBIFCH-BOL_LEPAA_0724		CSCF-PAP-963250		Natural History Museum of Neuchatel
GBIFCH-BOL_LEPAA_0725		CSCF-PAP-962350		Natural History Museum of Neuchatel
GBIFCH-BOL_LEPAA_0726		CSCF-PAP-962323		Natural History Museum of Neuchatel
GBIFCH-BOL_LEPAA_0727		CSCF-PAP-962821		Natural History Museum of Neuchatel
GBIFCH-BOL_LEPAA_0728		CSCF-PAP-963138		Natural History Museum of Neuchatel
GBIFCH-BOL_LEPAA_0729		CSCF-PAP-962179		Natural History Museum of Neuchatel
GBIFCH-BOL_LEPAA_0730		CSCF-PAP-962148		Natural History Museum of Neuchatel
GBIFCH-BOL_LEPAA_0731		CSCF-PAP-962557		Natural History Museum of Neuchatel
GBIFCH-BOL_LEPAA_0732		CSCF-PAP-961873		Natural History Museum of Neuchatel
GBIFCH-BOL_LEPAA_0733		CSCF-PAP-963113		Natural History Museum of Neuchatel
GBIFCH-BOL_LEPAA_0734		CSCF-PAP-962623		Natural History Museum of Neuchatel
GBIFCH-BOL_LEPAA_0735		CSCF-PAP-963280		Natural History Museum of Neuchatel
GBIFCH-BOL_LEPAA_0736		CSCF-PAP-963130		Natural History Museum of Neuchatel
GBIFCH-BOL_LEPAA_0737		CSCF-PAP-963160		Natural History Museum of Neuchatel
GBIFCH-BOL_LEPAA_0738		CSCF-PAP-963115		Natural History Museum of Neuchatel
GBIFCH-BOL_LEPAA_0739		CSCF-PAP-962562		Natural History Museum of Neuchatel
GBIFCH-BOL_LEPAA_0740		CSCF-PAP-961872		Natural History Museum of Neuchatel
GBIFCH-BOL_LEPAA_0741		CSCF-PAP-962482		Natural History Museum of Neuchatel
GBIFCH-BOL_LEPAA_0742		CSCF-PAP-962096		Natural History Museum of Neuchatel
GBIFCH-BOL_LEPAA_0743		CSCF-PAP-962928		Natural History Museum of Neuchatel
GBIFCH-BOL_LEPAA_0744		CSCF-PAP-962313		Natural History Museum of Neuchatel
GBIFCH-BOL_LEPAA_0745		CSCF-PAP-962547		Natural History Museum of Neuchatel
GBIFCH-BOL_LEPAA_0746		CSCF-PAP-963286		Natural History Museum of Neuchatel
GBIFCH-BOL_LEPAA_0747		CSCF-PAP-962122		Natural History Museum of Neuchatel
GBIFCH-BOL_LEPAA_0748		CSCF-PAP-963207		Natural History Museum of Neuchatel
GBIFCH-BOL_LEPAA_0749		CSCF-PAP-962237		Natural History Museum of Neuchatel
GBIFCH-BOL_LEPAA_0750		CSCF-PAP-962940		Natural History Museum of Neuchatel
GBIFCH-BOL_LEPAA_0751		CSCF-PAP-963145		Natural History Museum of Neuchatel
GBIFCH-BOL_LEPAA_0752		CSCF-PAP-961881		Natural History Museum of Neuchatel
GBIFCH-BOL_LEPAA_0753		CSCF-PAP-963193		Natural History Museum of Neuchatel
GBIFCH-BOL_LEPAA_0754		CSCF-PAP-962124		Natural History Museum of Neuchatel
GBIFCH-BOL_LEPAA_0755		CSCF-PAP-963102		Natural History Museum of Neuchatel
GBIFCH-BOL_LEPAA_0756		CSCF-PAP-963206		Natural History Museum of Neuchatel
GBIFCH-BOL_LEPAA_0757		CSCF-PAP-961967		Natural History Museum of Neuchatel
GBIFCH-BOL_LEPAA_0758		CSCF-PAP-963287		Natural History Museum of Neuchatel
GBIFCH-BOL_LEPAA_0759		CSCF-PAP-963265		Natural History Museum of Neuchatel
GBIFCH-BOL_LEPAA_0760		CSCF-PAP-962570		Natural History Museum of Neuchatel
GBIFCH-BOL_LEPAA_0761		CSCF-PAP-962039		Natural History Museum of Neuchatel
GBIFCH-BOL_LEPAA_0762		CSCF-PAP-704762		Natural History Museum of Neuchatel
GBIFCH-BOL_LEPAA_0763		CSCF-PAP-687225		Natural History Museum of Neuchatel
GBIFCH-BOL_LEPAA_0764		CSCF-PAP-635910		Natural History Museum of Neuchatel
GBIFCH-BOL_LEPAA_0765		CSCF-PAP-627883		Natural History Museum of Neuchatel
GBIFCH-BOL_LEPAA_0766		CSCF-PAP-699230		Natural History Museum of Neuchatel
GBIFCH-BOL_LEPAA_0767		CSCF-PAP-697296		Natural History Museum of Neuchatel
GBIFCH-BOL_LEPAA_0768		CSCF-PAP-639358		Natural History Museum of Neuchatel
GBIFCH-BOL_LEPAA_0769		CSCF-PAP-617701		Natural History Museum of Neuchatel
GBIFCH-BOL_LEPAA_0770		CSCF-PAP-696905		Natural History Museum of Neuchatel
GBIFCH-BOL_LEPAA_0771		CSCF-PAP-661204		Natural History Museum of Neuchatel
GBIFCH-BOL_LEPAA_0772		CSCF-PAP-642116		Natural History Museum of Neuchatel
GBIFCH-BOL_LEPAA_0773		CSCF-PAP-330126		Natural History Museum of Neuchatel
GBIFCH-BOL_LEPAA_0774		CSCF-PAP-642248		Natural History Museum of Neuchatel
GBIFCH-BOL_LEPAA_0775		CSCF-PAP-635887		Natural History Museum of Neuchatel
GBIFCH-BOL_LEPAA_0776		CSCF-PAP-308574		Natural History Museum of Neuchatel
GBIFCH-BOL_LEPAA_0777		CSCF-PAP-632388		Natural History Museum of Neuchatel
GBIFCH-BOL_LEPAA_0778		CSCF-PAP-632386		Natural History Museum of Neuchatel
GBIFCH-BOL_LEPAA_0779		CSCF-PAP-616866		Natural History Museum of Neuchatel
GBIFCH-BOL_LEPAA_0780		CSCF-PAP-1004104		Natural History Museum of Neuchatel
GBIFCH-BOL_LEPAA_0781		CSCF-PAP-1004069		Natural History Museum of Neuchatel
GBIFCH-BOL_LEPAA_0782	36119	CSCF-PAP-777970		Natural History Museum of Neuchatel
GBIFCH-BOL_LEPAA_0783		CSCF-PAP-1004096		Natural History Museum of Neuchatel
GBIFCH-BOL_LEPAA_0784		CSCF-PAP-1004087		Natural History Museum of Neuchatel
GBIFCH-BOL_LEPAA_0785		CSCF-PAP-1004111		Natural History Museum of Neuchatel
GBIFCH-BOL_LEPAA_0786		CSCF-PAP-905810		Natural History Museum of Neuchatel
GBIFCH-BOL_LEPAA_0787		CSCF-PAP-635874		Natural History Museum of Neuchatel
GBIFCH-BOL_LEPAA_0788		CSCF-PAP-1004150		Natural History Museum of Neuchatel
GBIFCH-BOL_LEPAA_0789		CSCF-PAP-1004137		Natural History Museum of Neuchatel
GBIFCH-BOL_LEPAA_0790		CSCF-PAP-697245		Natural History Museum of Neuchatel
GBIFCH-BOL_LEPAA_0791		CSCF-PAP-629361		Natural History Museum of Neuchatel
GBIFCH-BOL_LEPAA_0792		CSCF-PAP-699497		Natural History Museum of Neuchatel
GBIFCH-BOL_LEPAA_0793		CSCF-PAP-1004135		Natural History Museum of Neuchatel
GBIFCH-BOL_LEPAA_0794		CSCF-PAP-626837		Natural History Museum of Neuchatel
GBIFCH-BOL_LEPAA_0795		CSCF-PAP-642122		Natural History Museum of Neuchatel
GBIFCH-BOL_LEPAA_0796		CSCF-PAP-632339		Natural History Museum of Neuchatel
GBIFCH-BOL_LEPAA_0797		CSCF-PAP-1004129		Natural History Museum of Neuchatel
GBIFCH-BOL_LEPAA_0798		CSCF-PAP-782261		Natural History Museum of Neuchatel
GBIFCH-BOL_LEPAA_0799		CSCF-PAP-629335		Natural History Museum of Neuchatel
GBIFCH-BOL_LEPAA_0800		CSCF-PAP-782711		Natural History Museum of Neuchatel
GBIFCH-BOL_LEPAA_0801		CSCF-PAP-270879		Natural History Museum of Neuchatel
GBIFCH-BOL_LEPAA_0802		CSCF-PAP-641840		Natural History Museum of Neuchatel
GBIFCH-BOL_LEPAA_0803		CSCF-PAP-629367		Natural History Museum of Neuchatel
GBIFCH-BOL_LEPAA_0804		CSCF-PAP-632445		Natural History Museum of Neuchatel
GBIFCH-BOL_LEPAA_0805		CSCF-PAP-1004153		Natural History Museum of Neuchatel
GBIFCH-BOL_LEPAA_0806	31570	CSCF-PAP-780907		Natural History Museum of Neuchatel
GBIFCH-BOL_LEPAA_0807	34742	CSCF-PAP-775686		Natural History Museum of Neuchatel
GBIFCH-BOL_LEPAA_0808		CSCF-PAP-697235		Natural History Museum of Neuchatel
GBIFCH-BOL_LEPAA_0809		CSCF-PAP-658387		Natural History Museum of Neuchatel
GBIFCH-BOL_LEPAA_0810		CSCF-PAP-393793		Natural History Museum of Neuchatel
GBIFCH-BOL_LEPAA_0811		CSCF-PAP-1004097		Natural History Museum of Neuchatel
GBIFCH-BOL_LEPAA_0812		CSCF-PAP-1004133		Natural History Museum of Neuchatel
GBIFCH-BOL_LEPAA_0813		CSCF-PAP-1004071		Natural History Museum of Neuchatel
GBIFCH-BOL_LEPAA_0814		CSCF-PAP-1004074		Natural History Museum of Neuchatel
GBIFCH-BOL_LEPAA_0815		CSCF-PAP-1004065		Natural History Museum of Neuchatel
GBIFCH-BOL_LEPAA_0816		CSCF-PAP-1004106		Natural History Museum of Neuchatel
GBIFCH-BOL_LEPAA_0817		CSCF-PAP-1004143		Natural History Museum of Neuchatel
GBIFCH-BOL_LEPAA_0818		CSCF-PAP-1004098		Natural History Museum of Neuchatel
GBIFCH-BOL_LEPAA_0819		CSCF-PAP-1004061		Natural History Museum of Neuchatel
GBIFCH-BOL_LEPAA_0820		CSCF-PAP-1004099		Natural History Museum of Neuchatel
GBIFCH-BOL_LEPAA_0821		CSCF-PAP-1004118		Natural History Museum of Neuchatel
GBIFCH-BOL_LEPAA_0822		CSCF-PAP-1004100		Natural History Museum of Neuchatel
GBIFCH-BOL_LEPAA_0823		CSCF-PAP-1004107		Natural History Museum of Neuchatel
GBIFCH-BOL_LEPAA_0824		CSCF-PAP-1004131		Natural History Museum of Neuchatel
GBIFCH-BOL_LEPAA_0825		CSCF-PAP-1004078		Natural History Museum of Neuchatel
GBIFCH-BOL_LEPAA_0826		CSCF-PAP-1004144		Natural History Museum of Neuchatel
GBIFCH-BOL_LEPAA_0827		CSCF-PAP-1004127		Natural History Museum of Neuchatel
GBIFCH-BOL_LEPAA_0828		CSCF-PAP-1004103		Natural History Museum of Neuchatel
GBIFCH-BOL_LEPAA_0829		CSCF-PAP-1004146		Natural History Museum of Neuchatel
GBIFCH-BOL_LEPAA_0830		CSCF-PAP-1004121		Natural History Museum of Neuchatel
GBIFCH-BOL_LEPAA_0831		CSCF-PAP-1004128		Natural History Museum of Neuchatel
GBIFCH-BOL_LEPAA_0832		CSCF-PAP-1004062		Natural History Museum of Neuchatel
GBIFCH-BOL_LEPAA_0833		CSCF-PAP-1004101		Natural History Museum of Neuchatel
GBIFCH-BOL_LEPAA_0834		CSCF-PAP-1004151		Natural History Museum of Neuchatel
GBIFCH-BOL_LEPAA_0835		CSCF-PAP-1004079		Natural History Museum of Neuchatel
GBIFCH-BOL_LEPAA_0836		CSCF-PAP-1004064		Natural History Museum of Neuchatel
GBIFCH-BOL_LEPAA_0837		CSCF-PAP-1004108		Natural History Museum of Neuchatel
GBIFCH-BOL_LEPAA_0838		CSCF-PAP-1004072		Natural History Museum of Neuchatel
GBIFCH-BOL_LEPAA_0839		CSCF-PAP-1004081		Natural History Museum of Neuchatel
GBIFCH-BOL_LEPAA_0840		CSCF-PAP-1004075		Natural History Museum of Neuchatel
GBIFCH-BOL_LEPAA_0841		CSCF-PAP-1004113		Natural History Museum of Neuchatel
GBIFCH-BOL_LEPAA_0842		CSCF-PAP-1004094		Natural History Museum of Neuchatel
GBIFCH-BOL_LEPAA_0843		CSCF-PAP-1004109		Natural History Museum of Neuchatel
GBIFCH-BOL_LEPAA_0844		CSCF-PAP-1004149		Natural History Museum of Neuchatel
GBIFCH-BOL_LEPAA_0845		CSCF-PAP-1004152		Natural History Museum of Neuchatel
GBIFCH-BOL_LEPAA_0846		CSCF-PAP-1004066		Natural History Museum of Neuchatel
GBIFCH-BOL_LEPAA_0847		CSCF-PAP-1004093		Natural History Museum of Neuchatel
GBIFCH-BOL_LEPAA_0848		CSCF-PAP-1004102		Natural History Museum of Neuchatel
GBIFCH-BOL_LEPAA_0849		CSCF-PAP-1004083		Natural History Museum of Neuchatel
GBIFCH-BOL_LEPAA_0850		CSCF-PAP-1004141		Natural History Museum of Neuchatel
GBIFCH-BOL_LEPAA_0851		CSCF-PAP-1004058		Natural History Museum of Neuchatel
GBIFCH-BOL_LEPAA_0852		CSCF-PAP-1004142		Natural History Museum of Neuchatel
GBIFCH-BOL_LEPAA_0853		CSCF-PAP-1004148		Natural History Museum of Neuchatel
GBIFCH-BOL_LEPAA_0854		CSCF-PAP-1004073		Natural History Museum of Neuchatel
GBIFCH-BOL_LEPAA_0855		CSCF-PAP-1004119		Natural History Museum of Neuchatel
GBIFCH-BOL_LEPAA_0856		CSCF-PAP-1004117		Natural History Museum of Neuchatel
GBIFCH-BOL_LEPAA_0857		CSCF-PAP-1004105		Natural History Museum of Neuchatel
GBIFCH-BOL_LEPAA_0858		CSCF-PAP-1004082		Natural History Museum of Neuchatel
GBIFCH-BOL_LEPAA_0859		CSCF-PAP-1004116		Natural History Museum of Neuchatel
GBIFCH-BOL_LEPAA_0860		CSCF-PAP-1004132		Natural History Museum of Neuchatel
GBIFCH-BOL_LEPAA_0861		CSCF-PAP-1004089		Natural History Museum of Neuchatel
GBIFCH-BOL_LEPAA_0862		CSCF-PAP-1004077		Natural History Museum of Neuchatel
GBIFCH-BOL_LEPAA_0863		CSCF-PAP-1004140		Natural History Museum of Neuchatel
GBIFCH-BOL_LEPAA_0864		CSCF-PAP-1004063		Natural History Museum of Neuchatel
GBIFCH-BOL_LEPAA_0865		CSCF-PAP-1004112		Natural History Museum of Neuchatel
GBIFCH-BOL_LEPAA_0866		CSCF-PAP-1004123		Natural History Museum of Neuchatel
GBIFCH-BOL_LEPAA_0867		CSCF-PAP-1004076		Natural History Museum of Neuchatel
GBIFCH-BOL_LEPAA_0868		CSCF-PAP-1004130		Natural History Museum of Neuchatel
GBIFCH-BOL_LEPAA_0869		CSCF-PAP-1004122		Natural History Museum of Neuchatel
GBIFCH-BOL_LEPAA_0870		CSCF-PAP-1004138		Natural History Museum of Neuchatel
GBIFCH-BOL_LEPAA_0871		CSCF-PAP-1004068		Natural History Museum of Neuchatel
GBIFCH-BOL_LEPAA_0872		CSCF-PAP-1004090		Natural History Museum of Neuchatel
GBIFCH-BOL_LEPAA_0873		CSCF-PAP-1004114		Natural History Museum of Neuchatel
GBIFCH-BOL_LEPAA_0874		CSCF-PAP-1004060		Natural History Museum of Neuchatel
GBIFCH-BOL_LEPAA_0875		CSCF-PAP-1004059		Natural History Museum of Neuchatel
GBIFCH-BOL_LEPAA_0876		CSCF-PAP-1004070		Natural History Museum of Neuchatel
GBIFCH-BOL_LEPAA_0877		CSCF-PAP-1004080		Natural History Museum of Neuchatel
GBIFCH-BOL_LEPAA_0878		CSCF-PAP-1004091		Natural History Museum of Neuchatel
GBIFCH-BOL_LEPAA_0879		CSCF-PAP-1004085		Natural History Museum of Neuchatel
GBIFCH-BOL_LEPAA_0880		CSCF-PAP-1004139		Natural History Museum of Neuchatel
GBIFCH-BOL_LEPAA_0881		CSCF-PAP-1004095		Natural History Museum of Neuchatel
GBIFCH-BOL_LEPAA_0882		CSCF-PAP-1004136		Natural History Museum of Neuchatel
GBIFCH-BOL_LEPAA_0883		CSCF-PAP-1004067		Natural History Museum of Neuchatel
GBIFCH-BOL_LEPAA_0884		CSCF-PAP-1004124		Natural History Museum of Neuchatel
GBIFCH-BOL_LEPAA_0885		CSCF-PAP-1004086		Natural History Museum of Neuchatel
GBIFCH-BOL_LEPAA_0886		CSCF-PAP-1004115		Natural History Museum of Neuchatel
GBIFCH-BOL_LEPAA_0887		CSCF-PAP-1004084		Natural History Museum of Neuchatel
GBIFCH-BOL_LEPAA_0888		CSCF-PAP-1004134		Natural History Museum of Neuchatel
GBIFCH-BOL_LEPAA_0889		CSCF-PAP-1004126		Natural History Museum of Neuchatel
GBIFCH-BOL_LEPAA_0890		CSCF-PAP-1004110		Natural History Museum of Neuchatel
GBIFCH-BOL_LEPAA_0891		CSCF-PAP-1004147		Natural History Museum of Neuchatel
GBIFCH-BOL_LEPAA_0892		CSCF-PAP-1004145		Natural History Museum of Neuchatel
GBIFCH-BOL_LEPAA_0893		CSCF-PAP-1004088		Natural History Museum of Neuchatel
GBIFCH-BOL_LEPAA_0894		CSCF-PAP-1004125		Natural History Museum of Neuchatel
GBIFCH-BOL_LEPAA_0895		CSCF-PAP-1004092		Natural History Museum of Neuchatel
GBIFCH-BOL_LEPAA_0896		CSCF-PAP-1004120		Natural History Museum of Neuchatel
GBIFCH-BOL_LEPAA_0897		CSCF-PAP-970596		Natural History Museum of Neuchatel
GBIFCH-BOL_LEPAA_0898		CSCF-PAP-1016355		Natural History Museum of Neuchatel
GBIFCH-BOL_LEPAA_0899		CSCF-PAP-1017013		Natural History Museum of Neuchatel
GBIFCH-BOL_LEPAA_0900		CSCF-PAP-1017012		Natural History Museum of Neuchatel
GBIFCH-BOL_LEPAA_0901		CSCF-PAP-1066869		Natural History Museum of Neuchatel
GBIFCH-BOL_LEPAA_0902		CSCF-PAP-1017339		Natural History Museum of Neuchatel
GBIFCH-BOL_LEPAA_0903		CSCF-PAP-1017014		Natural History Museum of Neuchatel
GBIFCH-BOL_LEPAA_0904		CSCF-PAP-1017015		Natural History Museum of Neuchatel
GBIFCH-BOL_LEPAA_0905		CSCF-PAP-1017010		Natural History Museum of Neuchatel
GBIFCH-BOL_LEPAA_0906		CSCF-PAP-1016306		Centre Suisse de Cartographie de la Faune
GBIFCH-BOL_LEPAA_0907		CSCF-PAP-1017011		Natural History Museum of Neuchatel
GBIFCH-BOL_LEPAA_0944		CSCF-PAP-917034		Natural History Museum of Neuchatel
GBIFCH-BOL_LEPAA_0945		CSCF-PAP-759598		Natural History Museum of Neuchatel
GBIFCH-BOL_LEPAA_0946		CSCF-PAP-754757		Natural History Museum of Neuchatel
GBIFCH-BOL_LEPAA_0947		CSCF-PAP-1043685		Natural History Museum of Neuchatel
GBIFCH-BOL_LEPAA_0948		CSCF-PAP-912989		Natural History Museum of Neuchatel
GBIFCH-BOL_LEPAA_0949		CSCF-PAP-1054043		Natural History Museum of Neuchatel
GBIFCH-BOL_LEPAA_0950		CSCF-PAP-1044858		Natural History Museum of Neuchatel
GBIFCH-BOL_LEPAA_0951		CSCF-PAP-1046736		Natural History Museum of Neuchatel
GBIFCH-BOL_LEPAA_0952		CSCF-PAP-962010		Natural History Museum of Neuchatel
GBIFCH-BOL_LEPAA_0953		CSCF-PAP-1282624		Natural History Museum of Neuchatel
GBIFCH-BOL_LEPAA_0954		CSCF-PAP-1232977		Natural History Museum of Neuchatel
GBIFCH-BOL_LEPAA_0955		CSCF-PAP-1205660		Natural History Museum of Neuchatel
GBIFCH-BOL_LEPAA_0956		CSCF-PAP-975985		Natural History Museum of Neuchatel
GBIFCH-BOL_LEPAA_0957		CSCF-PAP-1021693		Natural History Museum of Neuchatel
GBIFCH-BOL_LEPAA_0958		CSCF-PAP-912692		Natural History Museum of Neuchatel
GBIFCH-BOL_LEPAA_0959		CSCF-PAP-912697		Natural History Museum of Neuchatel
GBIFCH-BOL_LEPAA_0960		CSCF-PAP-1059717		Natural History Museum of Neuchatel
GBIFCH-BOL_LEPAA_0961		CSCF-PAP-1027514		Natural History Museum of Neuchatel
GBIFCH-BOL_LEPAA_0962		CSCF-PAP-1282628		Natural History Museum of Neuchatel
GBIFCH-BOL_LEPAA_0964		CSCF-PAP-1235436		Natural History Museum of Neuchatel
GBIFCH-BOL_LEPAA_0965		CSCF-PAP-1027655		Natural History Museum of Neuchatel
GBIFCH-BOL_LEPAA_0966		CSCF-PAP-913183		Natural History Museum of Neuchatel
GBIFCH-BOL_LEPAA_0967		CSCF-PAP-1064173		Natural History Museum of Neuchatel
GBIFCH-BOL_LEPAA_0968		CSCF-PAP-931159		Natural History Museum of Neuchatel
GBIFCH-BOL_LEPAA_0969		CSCF-PAP-1060508		Natural History Museum of Neuchatel
GBIFCH-BOL_LEPAA_0970		CSCF-PAP-913190		Natural History Museum of Neuchatel
GBIFCH-BOL_LEPAA_0971		CSCF-PAP-755527		Natural History Museum of Neuchatel
GBIFCH-BOL_LEPAA_0972		CSCF-PAP-1058848		Natural History Museum of Neuchatel
GBIFCH-BOL_LEPAA_0974	218717	CSCF-PAP-1199315		Natural History Museum of Neuchatel
GBIFCH-BOL_LEPAA_0975		CSCF-PAP-1044618		Natural History Museum of Neuchatel
GBIFCH-BOL_LEPAA_0976		CSCF-PAP-962177		Natural History Museum of Neuchatel
GBIFCH-BOL_LEPAA_0977		CSCF-PAP-1026138		Natural History Museum of Neuchatel
GBIFCH-BOL_LEPAA_0978		CSCF-PAP-1282627		Natural History Museum of Neuchatel
GBIFCH-BOL_LEPAA_0979		CSCF-PAP-1059335		Natural History Museum of Neuchatel
GBIFCH-BOL_LEPAA_0980		CSCF-PAP-1055139		Natural History Museum of Neuchatel
GBIFCH-BOL_LEPAA_0981		CSCF-PAP-954504		Natural History Museum of Neuchatel
GBIFCH-BOL_LEPAA_0982		CSCF-PAP-1211595		Natural History Museum of Neuchatel
GBIFCH-BOL_LEPAA_0983		CSCF-PAP-1029761		Natural History Museum of Neuchatel
GBIFCH-BOL_LEPAA_0984		CSCF-PAP-1233817		Natural History Museum of Neuchatel
GBIFCH-BOL_LEPAA_0985		CSCF-PAP-893613		Natural History Museum of Neuchatel
GBIFCH-BOL_LEPAA_0986		CSCF-PAP-1282626		Natural History Museum of Neuchatel
GBIFCH-BOL_LEPAA_0987		CSCF-PAP-1282629		Natural History Museum of Neuchatel
GBIFCH-BOL_LEPAA_0988		CSCF-PAP-1125922		Natural History Museum of Neuchatel
GBIFCH-BOL_LEPAA_0989		CSCF-PAP-1201874		Natural History Museum of Neuchatel
GBIFCH-BOL_LEPAA_0991		CSCF-PAP-1125786		Natural History Museum of Neuchatel
GBIFCH-BOL_LEPAA_0992		CSCF-PAP-1201872		Natural History Museum of Neuchatel
GBIFCH-BOL_LEPAA_0993		CSCF-PAP-1125973		Natural History Museum of Neuchatel
GBIFCH-BOL_LEPAA_0994		CSCF-PAP-1125966		Natural History Museum of Neuchatel
GBIFCH-BOL_LEPAA_0995		CSCF-PAP-1125824		Natural History Museum of Neuchatel
GBIFCH-BOL_LEPAA_0996		CSCF-PAP-1126211		Natural History Museum of Neuchatel
GBIFCH-BOL_LEPAA_0997		CSCF-PAP-1201873		Natural History Museum of Neuchatel
GBIFCH-BOL_LEPAA_0998		CSCF-PAP-1125877		Natural History Museum of Neuchatel
GBIFCH-BOL_LEPAA_0999		CSCF-PAP-1201875		Natural History Museum of Neuchatel
GBIFCH-BOL_LEPAA_1000		CSCF-PAP-1201876		Natural History Museum of Neuchatel
GBIFCH-BOL_LEPAA_1001		CSCF-PAP-1126222		Natural History Museum of Neuchatel
GBIFCH-BOL_LEPAA_1002		CSCF-PAP-692708		Natural History Museum of Neuchatel
GBIFCH-BOL_LEPAA_1003		CSCF-PAP-692705		Natural History Museum of Neuchatel
GBIFCH-BOL_LEPAA_1004		CSCF-PAP-1125771		Natural History Museum of Neuchatel
GBIFCH-BOL_LEPAA_1005		CSCF-PAP-1126278		Natural History Museum of Neuchatel
GBIFCH-BOL_LEPAA_1006		CSCF-PAP-1126279		Natural History Museum of Neuchatel
GBIFCH-BOL_LEPAA_0908		CSCF-PAP-1040833		Natural History Museum of Neuchatel
GBIFCH-BOL_LEPAA_0909		CSCF-PAP-1037507		Natural History Museum of Neuchatel
GBIFCH-BOL_LEPAA_0910		CSCF-PAP-755941		Natural History Museum of Neuchatel
GBIFCH-BOL_LEPAA_0911		CSCF-PAP-1027299		Natural History Museum of Neuchatel
GBIFCH-BOL_LEPAA_0912		CSCF-PAP-963133		Natural History Museum of Neuchatel
GBIFCH-BOL_LEPAA_0913		CSCF-PAP-1223004		Natural History Museum of Neuchatel
GBIFCH-BOL_LEPAA_0914		CSCF-PAP-1222623		Natural History Museum of Neuchatel
GBIFCH-BOL_LEPAA_0915		CSCF-PAP-912737		Natural History Museum of Neuchatel
GBIFCH-BOL_LEPAA_0916		CSCF-PAP-1024630		Natural History Museum of Neuchatel
GBIFCH-BOL_LEPAA_0917		CSCF-PAP-912815		Natural History Museum of Neuchatel
GBIFCH-BOL_LEPAA_0918		CSCF-PAP-1056603		Natural History Museum of Neuchatel
GBIFCH-BOL_LEPAA_0919		CSCF-PAP-912832		Natural History Museum of Neuchatel
GBIFCH-BOL_LEPAA_0920		CSCF-PAP-1215185		Natural History Museum of Neuchatel
GBIFCH-BOL_LEPAA_0921		CSCF-PAP-1039737		Natural History Museum of Neuchatel
GBIFCH-BOL_LEPAA_0922		CSCF-PAP-1028303		Natural History Museum of Neuchatel
GBIFCH-BOL_LEPAA_0923		CSCF-PAP-912766		Natural History Museum of Neuchatel
GBIFCH-BOL_LEPAA_0924		CSCF-PAP-912762		Natural History Museum of Neuchatel
GBIFCH-BOL_LEPAA_0925		CSCF-PAP-1282625		Natural History Museum of Neuchatel
GBIFCH-BOL_LEPAA_0926		CSCF-PAP-912759		Natural History Museum of Neuchatel
GBIFCH-BOL_LEPAA_0927		CSCF-PAP-1022447		Natural History Museum of Neuchatel
GBIFCH-BOL_LEPAA_0928		CSCF-PAP-1217676		Natural History Museum of Neuchatel
GBIFCH-BOL_LEPAA_0929		CSCF-PAP-1043779		Natural History Museum of Neuchatel
GBIFCH-BOL_LEPAA_0930		CSCF-PAP-1228683		Natural History Museum of Neuchatel
GBIFCH-BOL_LEPAA_0931		CSCF-PAP-1049360		Natural History Museum of Neuchatel
GBIFCH-BOL_LEPAA_0932		CSCF-PAP-1028462		Natural History Museum of Neuchatel
GBIFCH-BOL_LEPAA_0933		CSCF-PAP-1235652		Natural History Museum of Neuchatel
GBIFCH-BOL_LEPAA_0934		CSCF-PAP-1282630		Natural History Museum of Neuchatel
GBIFCH-BOL_LEPAA_0935		CSCF-PAP-1024932		Natural History Museum of Neuchatel
GBIFCH-BOL_LEPAA_0936		CSCF-PAP-1040739		Natural History Museum of Neuchatel
GBIFCH-BOL_LEPAA_0937		CSCF-PAP-1001846		Natural History Museum of Neuchatel
GBIFCH-BOL_LEPAA_0938		CSCF-PAP-1064197		Natural History Museum of Neuchatel
GBIFCH-BOL_LEPAA_0939		CSCF-PAP-1221929		Natural History Museum of Neuchatel
GBIFCH-BOL_LEPAA_0940		CSCF-PAP-1207704		Natural History Museum of Neuchatel
GBIFCH-BOL_LEPAA_0941		CSCF-PAP-1238939		Natural History Museum of Neuchatel
GBIFCH-BOL_LEPAA_0942		CSCF-PAP-916718		Natural History Museum of Neuchatel
GBIFCH-BOL_LEPAA_0943		CSCF-PAP-912983		Natural History Museum of Neuchatel
GBIFCH-BOL_LEPAA_0963		CSCF-PAP-912960		Natural History Museum of Neuchatel
GBIFCH-BOL_LEPAA_0990		CSCF-PAP-1126164		Natural History Museum of Neuchatel
GBIFCH-BOL_LEPAA_1013	Z1	CSCF-PAP-2874171		Natural History Museum of Neuchatel
GBIFCH-BOL_LEPAA_1014	Z2	CSCF-PAP-2874172		Natural History Museum of Neuchatel
GBIFCH-BOL_LEPAA_1015	Z3	CSCF-PAP-2874170		Natural History Museum of Neuchatel
GBIFCH-BOL_LEPAA_1016	Z4	CSCF-PAP-2874169		Natural History Museum of Neuchatel
GBIFCH-BOL_LEPAA_1017	Z5	CSCF-PAP-2874183		Natural History Museum of Neuchatel
GBIFCH-BOL_LEPAA_1018	Z6	CSCF-PAP-2874182		Natural History Museum of Neuchatel
GBIFCH-BOL_LEPAA_1019	Z7	CSCF-PAP-2874179		Natural History Museum of Neuchatel
GBIFCH-BOL_LEPAA_1020	Z11	CSCF-PAP-2874164		Natural History Museum of Neuchatel
GBIFCH-BOL_LEPAA_1021	Z13	CSCF-PAP-2874177		Natural History Museum of Neuchatel
GBIFCH-BOL_LEPAA_1022	Z14	CSCF-PAP-2874178		Natural History Museum of Neuchatel
GBIFCH-BOL_LEPAA_1023	Z15	CSCF-PAP-2874163		Natural History Museum of Neuchatel
GBIFCH-BOL_LEPAA_1024	Z19	CSCF-PAP-2874173		Natural History Museum of Neuchatel
GBIFCH-BOL_LEPAA_1025	Z22	CSCF-PAP-2874174		Natural History Museum of Neuchatel
GBIFCH-BOL_LEPAA_1026	Z23	CSCF-PAP-2874175		Natural History Museum of Neuchatel
GBIFCH-BOL_LEPAA_1027	Z44	CSCF-PAP-957407		Natural History Museum of Neuchatel
GBIFCH-BOL_LEPAA_1028	Z45	CSCF-PAP-957412		Natural History Museum of Neuchatel
GBIFCH-BOL_LEPAA_1029	Z46	CSCF-PAP-957571		Natural History Museum of Neuchatel
GBIFCH-BOL_LEPAA_1030	Z47	CSCF-PAP-957570		Natural History Museum of Neuchatel
GBIFCH-BOL_LEPAA_1031	Z48	CSCF-PAP-2874181		Natural History Museum of Neuchatel
GBIFCH-BOL_LEPAA_1032	Z49	CSCF-PAP-2874180		Natural History Museum of Neuchatel
GBIFCH-BOL_LEPAA_1033	Z50	CSCF-PAP-1202639		Natural History Museum of Neuchatel
GBIFCH-BOL_LEPAA_1034	Z51	CSCF-PAP-957408		Natural History Museum of Neuchatel
GBIFCH-BOL_LEPAA_1035	Z52	CSCF-PAP-960549		Natural History Museum of Neuchatel
GBIFCH-BOL_LEPAA_1036	Z53	CSCF-PAP-2874176		Natural History Museum of Neuchatel
GBIFCH-BOL_LEPAA_1037	Z54	CSCF-PAP-2874165		Natural History Museum of Neuchatel
GBIFCH-BOL_LEPAA_1038	Z55	CSCF-PAP-1291113		Natural History Museum of Neuchatel
GBIFCH-BOL_LEPAA_1039	Z56	CSCF-PAP-959361		Natural History Museum of Neuchatel
GBIFCH-BOL_LEPAA_1040	Z57	CSCF-PAP-2874184		Natural History Museum of Neuchatel
GBIFCH-BOL_LEPAA_1041	Z58	CSCF-PAP-891071		Centre Suisse de Cartographie de la Faune
GBIFCH-BOL_LEPAA_1042	Z59	CSCF-PAP-2874155		Centre Suisse de Cartographie de la Faune
GBIFCH-BOL_LEPAA_1043	Z60	CSCF-PAP-2874156		Centre Suisse de Cartographie de la Faune
GBIFCH-BOL_LEPAA_1044	Z61	CSCF-PAP-2874157		Centre Suisse de Cartographie de la Faune
GBIFCH-BOL_LEPAA_1045	Z62	CSCF-PAP-2874166		Natural History Museum of Neuchatel
GBIFCH-BOL_LEPAA_1046	Z63	CSCF-PAP-2874167		Natural History Museum of Neuchatel
GBIFCH-BOL_LEPAA_1047	Z64	CSCF-PAP-2874168		Natural History Museum of Neuchatel
GBIFCH-BOL_LEPAA_1048	Z65	CSCF-PAP-891065		Centre Suisse de Cartographie de la Faune
GBIFCH-BOL_LEPAA_1049	Z66	CSCF-PAP-2874158		Centre Suisse de Cartographie de la Faune
GBIFCH-BOL_LEPAA_1050	Z67	CSCF-PAP-2874154		Centre Suisse de Cartographie de la Faune
GBIFCH-BOL_LEPAA_1051	Z68	CSCF-PAP-2874185		Centre Suisse de Cartographie de la Faune
GBIFCH-BOL_LEPAA_1052	Z69	CSCF-PAP-867052		Centre Suisse de Cartographie de la Faune
GBIFCH-BOL_LEPAA_1053	Z70	CSCF-PAP-2874153		Centre Suisse de Cartographie de la Faune
GBIFCH-BOL_LEPAA_1054	Z72	CSCF-PAP-1291110		Natural History Museum of Neuchatel
GBIFCH-BOL_LEPAA_1055	Z74	CSCF-PAP-2874159		Centre Suisse de Cartographie de la Faune
GBIFCH-BOL_LEPAA_1056	Z75	CSCF-PAP-2874162		Centre Suisse de Cartographie de la Faune
GBIFCH-BOL_LEPAA_1057	Z76	CSCF-PAP-963283		Centre Suisse de Cartographie de la Faune
GBIFCH-BOL_LEPAA_1058	Z77	CSCF-PAP-694849		Centre Suisse de Cartographie de la Faune
GBIFCH-BOL_LEPAA_1059	Z78	CSCF-PAP-2874160		Centre Suisse de Cartographie de la Faune
GBIFCH-BOL_LEPAA_1060	Z79	CSCF-PAP-695716		Centre Suisse de Cartographie de la Faune
GBIFCH-BOL_LEPAA_1061	CP1	CSCF-PAP-569456		Natural History Museum of Neuchatel
GBIFCH-BOL_LEPAA_1062	CP5	CSCF-PAP-912833		Natural History Museum of Neuchatel
GBIFCH-BOL_LEPAA_1063	CP6	CSCF-PAP-912835		Natural History Museum of Neuchatel
GBIFCH-BOL_LEPAA_1064	CP7	CSCF-PAP-912838		Natural History Museum of Neuchatel
GBIFCH-BOL_LEPAA_1065	CP8	CSCF-PAP-2874161		Natural History Museum of Neuchatel

## Sheet: Taxonomy
Project:	LEPAA			User:	Jessica R. Litman
Created:	2018-10-10
Sample ID	Phylum	Class	Order	Family	Subfamily	Tribe	Genus	Species	Subspecies	Identifier	Identifier Email	Identification Method	Taxonomy Notes
GBIFCH-BOL_LEPAA_0045	Arthropoda	Insecta	Lepidoptera	Zygaenidae	Zygaeninae		Zygaena	Zygaena purpuralis
GBIFCH-BOL_LEPAA_0046	Arthropoda	Insecta	Lepidoptera	Zygaenidae	Zygaeninae		Zygaena	Zygaena transalpina
GBIFCH-BOL_LEPAA_0047	Arthropoda	Insecta	Lepidoptera	Zygaenidae	Zygaeninae		Zygaena	Zygaena loti
GBIFCH-BOL_LEPAA_0048	Arthropoda	Insecta	Lepidoptera	Hesperiidae	Hesperiinae		Hesperia	Hesperia comma
GBIFCH-BOL_LEPAA_0001	Arthropoda	Insecta	Lepidoptera	Nymphalidae	Satyrinae		Melanargia	Melanargia galathea		Andreas Sanchez
GBIFCH-BOL_LEPAA_0002	Arthropoda	Insecta	Lepidoptera	Pieridae	Pierinae		Aporia	Aporia crataegi		Andreas Sanchez
GBIFCH-BOL_LEPAA_0003	Arthropoda	Insecta	Lepidoptera	Nymphalidae	Heliconiinae		Brenthis	Brenthis ino		Andreas Sanchez
GBIFCH-BOL_LEPAA_0004	Arthropoda	Insecta	Lepidoptera	Lycaenidae	Polyommatinae		Eumedonia	Eumedonia eumedon		Andreas Sanchez
GBIFCH-BOL_LEPAA_0005	Arthropoda	Insecta	Lepidoptera	Nymphalidae	Heliconiinae		Argynnis	Argynnis paphia		Andreas Sanchez
GBIFCH-BOL_LEPAA_0006	Arthropoda	Insecta	Lepidoptera	Hesperiidae	Pyrginae		Erynnis	Erynnis tages		Andreas Sanchez
GBIFCH-BOL_LEPAA_0007	Arthropoda	Insecta	Lepidoptera	Nymphalidae	Apaturinae		Apatura	Apatura ilia		Andreas Sanchez
GBIFCH-BOL_LEPAA_0008	Arthropoda	Insecta	Lepidoptera	Papilionidae	Parnassiinae		Parnassius	Parnassius apollo		Andreas Sanchez
GBIFCH-BOL_LEPAA_0009	Arthropoda	Insecta	Lepidoptera	Nymphalidae	Nymphalinae		Polygonia	Polygonia c-album		Andreas Sanchez
GBIFCH-BOL_LEPAA_0010	Arthropoda	Insecta	Lepidoptera	Nymphalidae	Satyrinae		Erebia	Erebia manto		Yannick Chittaro		identified by genitalia, anatomically
GBIFCH-BOL_LEPAA_0011	Arthropoda	Insecta	Lepidoptera	Nymphalidae	Satyrinae		Erebia	Erebia pandrose		Andreas Sanchez
GBIFCH-BOL_LEPAA_0012	Arthropoda	Insecta	Lepidoptera	Nymphalidae	Satyrinae		Erebia	Erebia euryale		Andreas Sanchez
GBIFCH-BOL_LEPAA_0013	Arthropoda	Insecta	Lepidoptera	Nymphalidae	Nymphalinae		Araschnia	Araschnia levana		Andreas Sanchez
GBIFCH-BOL_LEPAA_0014	Arthropoda	Insecta	Lepidoptera	Nymphalidae	Satyrinae		Erebia	Erebia pharte		Andreas Sanchez
GBIFCH-BOL_LEPAA_0015	Arthropoda	Insecta	Lepidoptera	Nymphalidae	Satyrinae		Erebia	Erebia oeme		Andreas Sanchez
GBIFCH-BOL_LEPAA_0016	Arthropoda	Insecta	Lepidoptera	Nymphalidae	Heliconiinae		Brenthis	Brenthis daphne		Andreas Sanchez
GBIFCH-BOL_LEPAA_0017	Arthropoda	Insecta	Lepidoptera	Zygaenidae	Zygaeninae		Zygaena	Zygaena fausta		Andreas Sanchez
GBIFCH-BOL_LEPAA_0018	Arthropoda	Insecta	Lepidoptera	Nymphalidae	Nymphalinae		Vanessa	Vanessa cardui		Andreas Sanchez
GBIFCH-BOL_LEPAA_0019	Arthropoda	Insecta	Lepidoptera	Lycaenidae	Polyommatinae		Cyaniris	Cyaniris semiargus		Andreas Sanchez
GBIFCH-BOL_LEPAA_0020	Arthropoda	Insecta	Lepidoptera	Hesperiidae	Hesperiinae		Thymelicus	Thymelicus sylvestris		Yannick Chittaro
GBIFCH-BOL_LEPAA_0021	Arthropoda	Insecta	Lepidoptera	Nymphalidae	Heliconiinae		Speyeria	Speyeria agalaja		Andreas Sanchez
GBIFCH-BOL_LEPAA_0022	Arthropoda	Insecta	Lepidoptera	Papilionidae	Papilioninae		Papilio	Papilio machaon		Andreas Sanchez
GBIFCH-BOL_LEPAA_0023	Arthropoda	Insecta	Lepidoptera	Nymphalidae	Satyrinae		Hyponephele	Hyponephele lycaon		Andreas Sanchez
GBIFCH-BOL_LEPAA_0024	Arthropoda	Insecta	Lepidoptera	Nymphalidae	Satyrinae		Hipparchia	Hipparchia semele		Andreas Sanchez
GBIFCH-BOL_LEPAA_0025	Arthropoda	Insecta	Lepidoptera	Nymphalidae	Heliconiinae		Issoria	Issoria lathonia		Andreas Sanchez
GBIFCH-BOL_LEPAA_0026	Arthropoda	Insecta	Lepidoptera	Nymphalidae	Satyrinae		Lasiommata	Lasiommata megera		Andreas Sanchez
GBIFCH-BOL_LEPAA_0027	Arthropoda	Insecta	Lepidoptera	Lycaenidae	Theclinae		Satyrium	Satyrium spini		Andreas Sanchez
GBIFCH-BOL_LEPAA_0028	Arthropoda	Insecta	Lepidoptera	Pieridae	Pierinae		Pieris	Pieris mannii		Andreas Sanchez
GBIFCH-BOL_LEPAA_0029	Arthropoda	Insecta	Lepidoptera	Lycaenidae	Polyommatinae		Polyommatus	Polyommatus dorylas		Andreas Sanchez
GBIFCH-BOL_LEPAA_0030	Arthropoda	Insecta	Lepidoptera	Lycaenidae	Polyommatinae		Plebejus	Plebejus idas		Andreas Sanchez
GBIFCH-BOL_LEPAA_0031	Arthropoda	Insecta	Lepidoptera	Pieridae	Pierinae		Pieris	Pieris brassicae
GBIFCH-BOL_LEPAA_0032	Arthropoda	Insecta	Lepidoptera	Pieridae	Pierinae		Pieris	Pieris bryoniae
GBIFCH-BOL_LEPAA_0033	Arthropoda	Insecta	Lepidoptera	Pieridae	Pierinae		Pieris	Pieris napi
GBIFCH-BOL_LEPAA_0034	Arthropoda	Insecta	Lepidoptera	Pieridae	Coliadinae		Colias	Colias palaeno
GBIFCH-BOL_LEPAA_0035	Arthropoda	Insecta	Lepidoptera	Pieridae	Coliadinae		Colias	Colias phicomone
GBIFCH-BOL_LEPAA_0036	Arthropoda	Insecta	Lepidoptera	Pieridae	Pierinae		Anthocharis	Anthocharis cardamines
GBIFCH-BOL_LEPAA_0037	Arthropoda	Insecta	Lepidoptera	Pieridae	Coliadinae		Colias	Colias croceus		Paolo Palmi
GBIFCH-BOL_LEPAA_0038	Arthropoda	Insecta	Lepidoptera	Zygaenidae	Zygaeninae		Zygaena	Zygaena ephialtes
GBIFCH-BOL_LEPAA_0039	Arthropoda	Insecta	Lepidoptera	Papilionidae	Papilioninae		Papilio	Papilio machaon		Paolo Palmi
GBIFCH-BOL_LEPAA_0040	Arthropoda	Insecta	Lepidoptera	Pieridae	Coliadinae		Gonepteryx	Gonepteryx rhamni		Paolo Palmi
GBIFCH-BOL_LEPAA_0041	Arthropoda	Insecta	Lepidoptera	Pieridae	Pierinae		Aporia	Aporia crataegi		Paolo Palmi
GBIFCH-BOL_LEPAA_0042	Arthropoda	Insecta	Lepidoptera	Pieridae	Pierinae		Pieris	Pieris rapae		Paolo Palmi
GBIFCH-BOL_LEPAA_0043	Arthropoda	Insecta	Lepidoptera	Zygaenidae	Zygaeninae		Zygaena	Zygaena exulans
GBIFCH-BOL_LEPAA_0044	Arthropoda	Insecta	Lepidoptera	Zygaenidae	Zygaeninae		Zygaena	Zygaena filipendulae
GBIFCH-BOL_LEPAA_0049	Arthropoda	Insecta	Lepidoptera	Hesperiidae	Heteropterinae		Carterocephalus	Carterocephalus palaemon
GBIFCH-BOL_LEPAA_0050	Arthropoda	Insecta	Lepidoptera	Hesperiidae	Pyrginae		Carcharodus	Carcharodus floccifera
GBIFCH-BOL_LEPAA_0051	Arthropoda	Insecta	Lepidoptera	Hesperiidae	Hesperiinae		Thymelicus	Thymelicus lineola
GBIFCH-BOL_LEPAA_0052	Arthropoda	Insecta	Lepidoptera	Hesperiidae	Hesperiinae		Ochlodes	Ochlodes sylvanus
GBIFCH-BOL_LEPAA_0053	Arthropoda	Insecta	Lepidoptera	Hesperiidae	Hesperiinae		Thymelicus	Thymelicus sylvestris		Paolo Palmi
GBIFCH-BOL_LEPAA_0054	Arthropoda	Insecta	Lepidoptera	Hesperiidae	Pyrginae		Erynnis	Erynnis tages		Paolo Palmi
GBIFCH-BOL_LEPAA_0055	Arthropoda	Insecta	Lepidoptera	Pieridae	Coliadinae		Colias	Colias hyale		Emmanuel Wermeille
GBIFCH-BOL_LEPAA_0056	Arthropoda	Insecta	Lepidoptera	Pieridae	Pierinae		Pieris	Pieris napi		Emmanuel Wermeille		identified by genitalia, anatomically
GBIFCH-BOL_LEPAA_0057	Arthropoda	Insecta	Lepidoptera	Pieridae	Pierinae		Pieris	Pieris mannii		Emmanuel Wermeille
GBIFCH-BOL_LEPAA_0058	Arthropoda	Insecta	Lepidoptera	Lycaenidae	Polyommatinae		Celastrina	Celastrina argiolus		Emmanuel Wermeille
GBIFCH-BOL_LEPAA_0059	Arthropoda	Insecta	Lepidoptera	Lycaenidae	Polyommatinae		Cupido	Cupido argiades		Emmanuel Wermeille
GBIFCH-BOL_LEPAA_0060	Arthropoda	Insecta	Lepidoptera	Lycaenidae	Polyommatinae		Cupido	Cupido minimus		Emmanuel Wermeille
GBIFCH-BOL_LEPAA_0061	Arthropoda	Insecta	Lepidoptera	Lycaenidae	Polyommatinae		Polyommatus	Polyommatus icarus		Emmanuel Wermeille
GBIFCH-BOL_LEPAA_0062	Arthropoda	Insecta	Lepidoptera	Lycaenidae	Polyommatinae		Polyommatus	Polyommatus thersites		Emmanuel Wermeille
GBIFCH-BOL_LEPAA_0063	Arthropoda	Insecta	Lepidoptera	Lycaenidae	Polyommatinae		Lysandra	Lysandra coridon		Emmanuel Wermeille
GBIFCH-BOL_LEPAA_0064	Arthropoda	Insecta	Lepidoptera	Lycaenidae	Theclinae		Satyrium	Satyrium pruni		Emmanuel Wermeille
GBIFCH-BOL_LEPAA_0065	Arthropoda	Insecta	Lepidoptera	Hesperiidae	Pyrginae		Carcharodus	Carcharodus alceae		Emmanuel Wermeille
GBIFCH-BOL_LEPAA_0066	Arthropoda	Insecta	Lepidoptera	Hesperiidae	Pyrginae		Erynnis	Erynnis tages		Emmanuel Wermeille
GBIFCH-BOL_LEPAA_0067	Arthropoda	Insecta	Lepidoptera	Nymphalidae	Heliconiinae		Brenthis	Brenthis daphne		Emmanuel Wermeille
GBIFCH-BOL_LEPAA_0068	Arthropoda	Insecta	Lepidoptera	Nymphalidae	Satyrinae		Erebia	Erebia aethiops		Emmanuel Wermeille
GBIFCH-BOL_LEPAA_0069	Arthropoda	Insecta	Lepidoptera	Lycaenidae	Theclinae		Thecla	Thecla betulae		Emmanuel Wermeille
GBIFCH-BOL_LEPAA_0070	Arthropoda	Insecta	Lepidoptera	Zygaenidae	Zygaeninae		Zygaena	Zygaena loti		Emmanuel Wermeille
GBIFCH-BOL_LEPAA_0071	Arthropoda	Insecta	Lepidoptera	Zygaenidae	Zygaeninae		Zygaena	Zygaena ephialtes		Emmanuel Wermeille
GBIFCH-BOL_LEPAA_0072	Arthropoda	Insecta	Lepidoptera	Zygaenidae	Zygaeninae		Zygaena	Zygaena transalpina		Emmanuel Wermeille
GBIFCH-BOL_LEPAA_0073	Arthropoda	Insecta	Lepidoptera	Nymphalidae	Satyrinae		Minois	Minois dryas		Emmanuel Wermeille
GBIFCH-BOL_LEPAA_0074	Arthropoda	Insecta	Lepidoptera	Nymphalidae	Satyrinae		Pararge	Pararge aegeria		Emmanuel Wermeille
GBIFCH-BOL_LEPAA_0075	Arthropoda	Insecta	Lepidoptera	Nymphalidae	Satyrinae		Pararge	Pararge aegeria		Emmanuel Wermeille
GBIFCH-BOL_LEPAA_0076	Arthropoda	Insecta	Lepidoptera	Nymphalidae	Nymphalinae		Melitaea	Melitaea cinxia		Emmanuel Wermeille
GBIFCH-BOL_LEPAA_0077	Arthropoda	Insecta	Lepidoptera	Lycaenidae	Polyommatinae		Polyommatus	Polyommatus thersites		Emmanuel Wermeille
GBIFCH-BOL_LEPAA_0078	Arthropoda	Insecta	Lepidoptera	Lycaenidae	Polyommatinae		Plebejus	Plebejus argyrognomon		Yannick Chittaro		identified by genitalia, anatomically
GBIFCH-BOL_LEPAA_0079	Arthropoda	Insecta	Lepidoptera	Lycaenidae	Polyommatinae		Aricia	Aricia agestis		Emmanuel Wermeille
GBIFCH-BOL_LEPAA_0080	Arthropoda	Insecta	Lepidoptera	Pieridae	Dismorphiinae		Leptidea	Leptidea juvernica		Emmanuel Wermeille		identified by genitalia, anatomically
GBIFCH-BOL_LEPAA_0081	Arthropoda	Insecta	Lepidoptera	Pieridae	Dismorphiinae		Leptidea	Leptidea sinapis		Emmanuel Wermeille
GBIFCH-BOL_LEPAA_0082	Arthropoda	Insecta	Lepidoptera	Nymphalidae	Heliconiinae		Boloria	Boloria pales		Yannick Chittaro
GBIFCH-BOL_LEPAA_0083	Arthropoda	Insecta	Lepidoptera	Nymphalidae	Nymphalinae		Melitaea	Melitaea nevadensis		Yannick Chittaro		identified by genitalia, anatomically
GBIFCH-BOL_LEPAA_0084	Arthropoda	Insecta	Lepidoptera	Nymphalidae	Heliconiinae		Boloria	Boloria dia
GBIFCH-BOL_LEPAA_0085	Arthropoda	Insecta	Lepidoptera	Nymphalidae	Heliconiinae		Boloria	Boloria euphrosyne		Paolo Palmi
GBIFCH-BOL_LEPAA_0086	Arthropoda	Insecta	Lepidoptera	Nymphalidae	Satyrinae		Melanargia	Melanargia galathea
GBIFCH-BOL_LEPAA_0087	Arthropoda	Insecta	Lepidoptera	Nymphalidae	Satyrinae		Lasiommata	Lasiommata petropolitana
GBIFCH-BOL_LEPAA_0088	Arthropoda	Insecta	Lepidoptera	Nymphalidae	Satyrinae		Lasiommata	Lasiommata maera
GBIFCH-BOL_LEPAA_0089	Arthropoda	Insecta	Lepidoptera	Nymphalidae	Satyrinae		Lasiommata	Lasiommata megera		Paolo Palmi
GBIFCH-BOL_LEPAA_0090	Arthropoda	Insecta	Lepidoptera	Nymphalidae	Satyrinae		Minois	Minois dryas		Paolo Palmi
GBIFCH-BOL_LEPAA_0091	Arthropoda	Insecta	Lepidoptera	Nymphalidae	Satyrinae		Coenonympha	Coenonympha pamphilus		Paolo Palmi
GBIFCH-BOL_LEPAA_0092	Arthropoda	Insecta	Lepidoptera	Nymphalidae	Heliconiinae		Brenthis	Brenthis daphne
GBIFCH-BOL_LEPAA_0093	Arthropoda	Insecta	Lepidoptera	Nymphalidae	Heliconiinae		Boloria	Boloria titania
GBIFCH-BOL_LEPAA_0094	Arthropoda	Insecta	Lepidoptera	Nymphalidae	Nymphalinae		Melitaea	Melitaea diamina
GBIFCH-BOL_LEPAA_0095	Arthropoda	Insecta	Lepidoptera	Nymphalidae	Nymphalinae		Euphydryas	Euphydryas aurinia	Euphydryas aurinia glaciegenita
GBIFCH-BOL_LEPAA_0096	Arthropoda	Insecta	Lepidoptera	Nymphalidae	Heliconiinae		Fabriciana	Fabriciana niobe
GBIFCH-BOL_LEPAA_0097	Arthropoda	Insecta	Lepidoptera	Nymphalidae	Limenitidinae		Limenitis	Limenitis camilla
GBIFCH-BOL_LEPAA_0098	Arthropoda	Insecta	Lepidoptera	Nymphalidae	Satyrinae		Oeneis	Oeneis glacialis
GBIFCH-BOL_LEPAA_0099	Arthropoda	Insecta	Lepidoptera	Nymphalidae	Satyrinae		Hipparchia	Hipparchia semele		Paolo Palmi
GBIFCH-BOL_LEPAA_0100	Arthropoda	Insecta	Lepidoptera	Nymphalidae	Satyrinae		Hipparchia	Hipparchia fagi		Paolo Palmi
GBIFCH-BOL_LEPAA_0101	Arthropoda	Insecta	Lepidoptera	Nymphalidae	Satyrinae		Erebia	Erebia alberganus
GBIFCH-BOL_LEPAA_0102	Arthropoda	Insecta	Lepidoptera	Nymphalidae	Satyrinae		Erebia	Erebia ligea
GBIFCH-BOL_LEPAA_0103	Arthropoda	Insecta	Lepidoptera	Nymphalidae	Satyrinae		Erebia	Erebia melampus		Yannick Chittaro		identified by genitalia, anatomically
GBIFCH-BOL_LEPAA_0104	Arthropoda	Insecta	Lepidoptera	Nymphalidae	Satyrinae		Erebia	Erebia pharte
GBIFCH-BOL_LEPAA_0105	Arthropoda	Insecta	Lepidoptera	Nymphalidae	Satyrinae		Erebia	Erebia epiphron
GBIFCH-BOL_LEPAA_0106	Arthropoda	Insecta	Lepidoptera	Nymphalidae	Satyrinae		Coenonympha	Coenonympha darwiniana
GBIFCH-BOL_LEPAA_0107	Arthropoda	Insecta	Lepidoptera	Nymphalidae	Satyrinae		Coenonympha	Coenonympha arcania
GBIFCH-BOL_LEPAA_0108	Arthropoda	Insecta	Lepidoptera	Nymphalidae	Nymphalinae		Melitaea	Melitaea didyma		Paolo Palmi
GBIFCH-BOL_LEPAA_0109	Arthropoda	Insecta	Lepidoptera	Nymphalidae	Heliconiinae		Speyeria	Speyeria agalaja		Paolo Palmi
GBIFCH-BOL_LEPAA_0110	Arthropoda	Insecta	Lepidoptera	Nymphalidae	Heliconiinae		Boloria	Boloria selene		Paolo Palmi
GBIFCH-BOL_LEPAA_0111	Arthropoda	Insecta	Lepidoptera	Nymphalidae	Satyrinae		Maniola	Maniola jurtina		Paolo Palmi
GBIFCH-BOL_LEPAA_0112	Arthropoda	Insecta	Lepidoptera	Nymphalidae	Satyrinae		Erebia	Erebia euryale
GBIFCH-BOL_LEPAA_0113	Arthropoda	Insecta	Lepidoptera	Nymphalidae	Satyrinae		Erebia	Erebia tyndarus
GBIFCH-BOL_LEPAA_0114	Arthropoda	Insecta	Lepidoptera	Lycaenidae	Polyommatinae		Aricia	Aricia artaxerxes		Yannick Chittaro
GBIFCH-BOL_LEPAA_0115	Arthropoda	Insecta	Lepidoptera	Lycaenidae	Polyommatinae		Cupido	Cupido minimus
GBIFCH-BOL_LEPAA_0116	Arthropoda	Insecta	Lepidoptera	Lycaenidae	Lycaeninae		Lycaena	Lycaena hippothoe	Lycaena hippothoe eurydame	Yannick Chittaro
GBIFCH-BOL_LEPAA_0117	Arthropoda	Insecta	Lepidoptera	Lycaenidae	Polyommatinae		Eumedonia	Eumedonia eumedon
GBIFCH-BOL_LEPAA_0118	Arthropoda	Insecta	Lepidoptera	Lycaenidae	Polyommatinae		Plebejus	Plebejus argyrognomon
GBIFCH-BOL_LEPAA_0119	Arthropoda	Insecta	Lepidoptera	Lycaenidae	Polyommatinae		Celastrina	Celastrina argiolus		Paolo Palmi
GBIFCH-BOL_LEPAA_0120	Arthropoda	Insecta	Lepidoptera	Lycaenidae	Polyommatinae		Polyommatus	Polyommatus icarus		Paolo Palmi
GBIFCH-BOL_LEPAA_0121	Arthropoda	Insecta	Lepidoptera	Lycaenidae	Polyommatinae		Aricia	Aricia agestis		Paolo Palmi
GBIFCH-BOL_LEPAA_0122	Arthropoda	Insecta	Lepidoptera	Lycaenidae	Polyommatinae		Plebejus	Plebejus argyrognomon
GBIFCH-BOL_LEPAA_0123	Arthropoda	Insecta	Lepidoptera	Zygaenidae	Zygaeninae		Zygaena	Zygaena romeo				identified on photo
GBIFCH-BOL_LEPAA_0124	Arthropoda	Insecta	Lepidoptera	Nymphalidae	Nymphalinae		Melitaea	Melitaea phoebe
GBIFCH-BOL_LEPAA_0125	Arthropoda	Insecta	Lepidoptera	Nymphalidae	Satyrinae		Erebia	Erebia pronoe	Erebia pronoe psathura
GBIFCH-BOL_LEPAA_0126	Arthropoda	Insecta	Lepidoptera	Nymphalidae	Satyrinae		Erebia	Erebia bubastis		Yannick Chittaro		identified by genitalia, anatomically
GBIFCH-BOL_LEPAA_0127	Arthropoda	Insecta	Lepidoptera	Nymphalidae	Satyrinae		Erebia	Erebia montana
GBIFCH-BOL_LEPAA_0128	Arthropoda	Insecta	Lepidoptera	Hesperiidae	Pyrginae		Pyrgus	Pyrgus serratulae
GBIFCH-BOL_LEPAA_0129	Arthropoda	Insecta	Lepidoptera	Lycaenidae	Polyommatinae		Cupido	Cupido alcetas		Laurent Juillerat
GBIFCH-BOL_LEPAA_0130	Arthropoda	Insecta	Lepidoptera	Lycaenidae	Polyommatinae		Polyommatus	Polyommatus icarus		Laurent Juillerat
GBIFCH-BOL_LEPAA_0131	Arthropoda	Insecta	Lepidoptera	Lycaenidae	Polyommatinae		Lysandra	Lysandra bellargus		Laurent Juillerat
GBIFCH-BOL_LEPAA_0132	Arthropoda	Insecta	Lepidoptera	Lycaenidae	Lycaeninae		Lycaena	Lycaena phlaeas		Laurent Juillerat
GBIFCH-BOL_LEPAA_0133	Arthropoda	Insecta	Lepidoptera	Lycaenidae	Theclinae		Satyrium	Satyrium spini		Laurent Juillerat
GBIFCH-BOL_LEPAA_0134	Arthropoda	Insecta	Lepidoptera	Zygaenidae	Zygaeninae		Zygaena	Zygaena filipendulae		Laurent Juillerat		identified by genitalia, anatomically
GBIFCH-BOL_LEPAA_0135	Arthropoda	Insecta	Lepidoptera	Pieridae	Dismorphiinae		Leptidea	Leptidea sinapis		Laurent Juillerat		identified by genitalia, anatomically
GBIFCH-BOL_LEPAA_0136	Arthropoda	Insecta	Lepidoptera	Pieridae	Coliadinae		Gonepteryx	Gonepteryx rhamni		Laurent Juillerat
GBIFCH-BOL_LEPAA_0137	Arthropoda	Insecta	Lepidoptera	Pieridae	Pierinae		Pieris	Pieris rapae		Laurent Juillerat
GBIFCH-BOL_LEPAA_0138	Arthropoda	Insecta	Lepidoptera	Nymphalidae	Heliconiinae		Issoria	Issoria lathonia		Laurent Juillerat
GBIFCH-BOL_LEPAA_0139	Arthropoda	Insecta	Lepidoptera	Nymphalidae	Nymphalinae		Melitaea	Melitaea athalia		Laurent Juillerat		identified by genitalia, anatomically
GBIFCH-BOL_LEPAA_0140	Arthropoda	Insecta	Lepidoptera	Nymphalidae	Heliconiinae		Boloria	Boloria euphrosyne		Laurent Juillerat
GBIFCH-BOL_LEPAA_0141	Arthropoda	Insecta	Lepidoptera	Nymphalidae	Satyrinae		Aphantopus	Aphantopus hyperantus		Laurent Juillerat
GBIFCH-BOL_LEPAA_0142	Arthropoda	Insecta	Lepidoptera	Nymphalidae	Satyrinae		Maniola	Maniola jurtina		Laurent Juillerat
GBIFCH-BOL_LEPAA_0143	Arthropoda	Insecta	Lepidoptera	Nymphalidae	Satyrinae		Coenonympha	Coenonympha arcania		Laurent Juillerat
GBIFCH-BOL_LEPAA_0144	Arthropoda	Insecta	Lepidoptera	Nymphalidae	Satyrinae		Melanargia	Melanargia galathea		Laurent Juillerat
GBIFCH-BOL_LEPAA_0145	Arthropoda	Insecta	Lepidoptera	Nymphalidae	Satyrinae		Coenonympha	Coenonympha pamphilus		Laurent Juillerat
GBIFCH-BOL_LEPAA_0146	Arthropoda	Insecta	Lepidoptera	Hesperiidae	Pyrginae		Pyrgus	Pyrgus malvae		Yannick Chittaro		identified by genitalia, anatomically
GBIFCH-BOL_LEPAA_0147	Arthropoda	Insecta	Lepidoptera	Lycaenidae	Polyommatinae		Cyaniris	Cyaniris semiargus
GBIFCH-BOL_LEPAA_0148	Arthropoda	Insecta	Lepidoptera	Hesperiidae	Heteropterinae		Carterocephalus	Carterocephalus palaemon		Laurent Juillerat
GBIFCH-BOL_LEPAA_0149	Arthropoda	Insecta	Lepidoptera	Hesperiidae	Hesperiinae		Ochlodes	Ochlodes sylvanus		Laurent Juillerat
GBIFCH-BOL_LEPAA_0150	Arthropoda	Insecta	Lepidoptera	Hesperiidae	Hesperiinae		Thymelicus	Thymelicus sylvestris		Laurent Juillerat
GBIFCH-BOL_LEPAA_0151	Arthropoda	Insecta	Lepidoptera	Pieridae	Pierinae		Pieris	Pieris napi		Yannick Chittaro
GBIFCH-BOL_LEPAA_0152	Arthropoda	Insecta	Lepidoptera	Nymphalidae	Heliconiinae		Boloria	Boloria dia		Yannick Chittaro
GBIFCH-BOL_LEPAA_0153	Arthropoda	Insecta	Lepidoptera	Nymphalidae	Nymphalinae		Melitaea	Melitaea cinxia		Yannick Chittaro
GBIFCH-BOL_LEPAA_0154	Arthropoda	Insecta	Lepidoptera	Riodinidae	Nemeobiinae		Hamearis	Hamearis lucina		Yannick Chittaro
GBIFCH-BOL_LEPAA_0155	Arthropoda	Insecta	Lepidoptera	Nymphalidae	Nymphalinae		Melitaea	Melitaea didyma		Yannick Chittaro
GBIFCH-BOL_LEPAA_0156	Arthropoda	Insecta	Lepidoptera	Nymphalidae	Nymphalinae		Melitaea	Melitaea parthenoides		Yannick Chittaro		identified by genitalia, anatomically
GBIFCH-BOL_LEPAA_0157	Arthropoda	Insecta	Lepidoptera	Nymphalidae	Limenitidinae		Limenitis	Limenitis camilla		Yannick Chittaro
GBIFCH-BOL_LEPAA_0158	Arthropoda	Insecta	Lepidoptera	Nymphalidae	Satyrinae		Erebia	Erebia triaria		Yannick Chittaro
GBIFCH-BOL_LEPAA_0159	Arthropoda	Insecta	Lepidoptera	Lycaenidae	Polyommatinae		Eumedonia	Eumedonia eumedon		Yannick Chittaro
GBIFCH-BOL_LEPAA_0160	Arthropoda	Insecta	Lepidoptera	Nymphalidae	Satyrinae		Pararge	Pararge aegeria		Yannick Chittaro
GBIFCH-BOL_LEPAA_0161	Arthropoda	Insecta	Lepidoptera	Nymphalidae	Nymphalinae		Nymphalis	Nymphalis antiopa		Marie-christine Chittaro
GBIFCH-BOL_LEPAA_0162	Arthropoda	Insecta	Lepidoptera	Nymphalidae	Nymphalinae		Aglais	Aglais io		Marie-christine Chittaro
GBIFCH-BOL_LEPAA_0163	Arthropoda	Insecta	Lepidoptera	Nymphalidae	Satyrinae		Erebia	Erebia pandrose		Yannick Chittaro
GBIFCH-BOL_LEPAA_0164	Arthropoda	Insecta	Lepidoptera	Nymphalidae	Satyrinae		Erebia	Erebia melampus		Yannick Chittaro
GBIFCH-BOL_LEPAA_0165	Arthropoda	Insecta	Lepidoptera	Zygaenidae	Zygaeninae		Zygaena	Zygaena loti		Yannick Chittaro
GBIFCH-BOL_LEPAA_0166	Arthropoda	Insecta	Lepidoptera	Lycaenidae	Polyommatinae		Scolitantides	Scolitantides orion		Yannick Chittaro
GBIFCH-BOL_LEPAA_0167	Arthropoda	Insecta	Lepidoptera	Lycaenidae	Polyommatinae		Glaucopsyche	Glaucopsyche alexis		Yannick Chittaro
GBIFCH-BOL_LEPAA_0168	Arthropoda	Insecta	Lepidoptera	Lycaenidae	Polyommatinae		Lysandra	Lysandra bellargus		Yannick Chittaro
GBIFCH-BOL_LEPAA_0169	Arthropoda	Insecta	Lepidoptera	Lycaenidae	Polyommatinae		Pseudophilotes	Pseudophilotes baton		Yannick Chittaro
GBIFCH-BOL_LEPAA_0170	Arthropoda	Insecta	Lepidoptera	Nymphalidae	Satyrinae		Coenonympha	Coenonympha darwiniana		Yannick Chittaro
GBIFCH-BOL_LEPAA_0171	Arthropoda	Insecta	Lepidoptera	Lycaenidae	Theclinae		Callophrys	Callophrys rubi		Yannick Chittaro
GBIFCH-BOL_LEPAA_0172	Arthropoda	Insecta	Lepidoptera	Lycaenidae	Polyommatinae		Cupido	Cupido alcetas		Yannick Chittaro
GBIFCH-BOL_LEPAA_0173	Arthropoda	Insecta	Lepidoptera	Nymphalidae	Satyrinae		Coenonympha	Coenonympha pamphilus		Yannick Chittaro
GBIFCH-BOL_LEPAA_0174	Arthropoda	Insecta	Lepidoptera	Nymphalidae	Satyrinae		Coenonympha	Coenonympha darwiniana		Yannick Chittaro
GBIFCH-BOL_LEPAA_0175	Arthropoda	Insecta	Lepidoptera	Nymphalidae	Satyrinae		Coenonympha	Coenonympha arcania		Yannick Chittaro
GBIFCH-BOL_LEPAA_0176	Arthropoda	Insecta	Lepidoptera	Hesperiidae	Pyrginae		Carcharodus	Carcharodus alceae		Yannick Chittaro
GBIFCH-BOL_LEPAA_0177	Arthropoda	Insecta	Lepidoptera	Hesperiidae	Pyrginae		Erynnis	Erynnis tages		Yannick Chittaro
GBIFCH-BOL_LEPAA_0178	Arthropoda	Insecta	Lepidoptera	Lycaenidae	Polyommatinae		Phengaris	Phengaris arion		Yannick Chittaro
GBIFCH-BOL_LEPAA_0179	Arthropoda	Insecta	Lepidoptera	Pieridae	Coliadinae		Colias	Colias croceus		Jerome Pellet
GBIFCH-BOL_LEPAA_0180	Arthropoda	Insecta	Lepidoptera	Nymphalidae	Heliconiinae		Boloria	Boloria euphrosyne		Jerome Pellet
GBIFCH-BOL_LEPAA_0181	Arthropoda	Insecta	Lepidoptera	Lycaenidae	Polyommatinae		Cupido	Cupido alcetas		Jerome Pellet
GBIFCH-BOL_LEPAA_0182	Arthropoda	Insecta	Lepidoptera	Hesperiidae	Pyrginae		Pyrgus	Pyrgus serratulae		Jerome Pellet
GBIFCH-BOL_LEPAA_0183	Arthropoda	Insecta	Lepidoptera	Nymphalidae	Limenitidinae		Limenitis	Limenitis camilla		Jerome Pellet
GBIFCH-BOL_LEPAA_0184	Arthropoda	Insecta	Lepidoptera	Nymphalidae	Satyrinae		Pararge	Pararge aegeria		Jerome Pellet
GBIFCH-BOL_LEPAA_0185	Arthropoda	Insecta	Lepidoptera	Pieridae	Coliadinae		Gonepteryx	Gonepteryx rhamni		Jerome Pellet
GBIFCH-BOL_LEPAA_0186	Arthropoda	Insecta	Lepidoptera	Pieridae	Pierinae		Pieris	Pieris brassicae		Jerome Pellet
GBIFCH-BOL_LEPAA_0187	Arthropoda	Insecta	Lepidoptera	Pieridae	Pierinae		Anthocharis	Anthocharis cardamines		Jerome Pellet
GBIFCH-BOL_LEPAA_0188	Arthropoda	Insecta	Lepidoptera	Nymphalidae	Satyrinae		Minois	Minois dryas		Antoine Gander
GBIFCH-BOL_LEPAA_0189	Arthropoda	Insecta	Lepidoptera	Lycaenidae	Polyommatinae		Celastrina	Celastrina argiolus		Michel Baudraz
GBIFCH-BOL_LEPAA_0190	Arthropoda	Insecta	Lepidoptera	Hesperiidae	Pyrginae		Carcharodus	Carcharodus alceae		Kathrin Hartmann Walter
GBIFCH-BOL_LEPAA_0191	Arthropoda	Insecta	Lepidoptera	Pieridae	Pierinae		Pieris	Pieris rapae		Kathrin Hartmann Walter
GBIFCH-BOL_LEPAA_0192	Arthropoda	Insecta	Lepidoptera	Pieridae	Pierinae		Pontia	Pontia callidice		Yannick Chittaro
GBIFCH-BOL_LEPAA_0193	Arthropoda	Insecta	Lepidoptera	Lycaenidae	Polyommatinae		Polyommatus	Polyommatus damon		Yannick Chittaro
GBIFCH-BOL_LEPAA_0194	Arthropoda	Insecta	Lepidoptera	Nymphalidae	Satyrinae		Hipparchia	Hipparchia statilinus				identified at sight
GBIFCH-BOL_LEPAA_0195	Arthropoda	Insecta	Lepidoptera	Lycaenidae	Lycaeninae		Lycaena	Lycaena tityrus	Lycaena tityrus tityrus	Yannick Chittaro
GBIFCH-BOL_LEPAA_0196	Arthropoda	Insecta	Lepidoptera	Lycaenidae	Lycaeninae		Lycaena	Lycaena phlaeas		Yannick Chittaro
GBIFCH-BOL_LEPAA_0197	Arthropoda	Insecta	Lepidoptera	Lycaenidae	Polyommatinae		Celastrina	Celastrina argiolus		Yannick Chittaro
GBIFCH-BOL_LEPAA_0198	Arthropoda	Insecta	Lepidoptera	Nymphalidae	Satyrinae		Erebia	Erebia medusa		Yannick Chittaro
GBIFCH-BOL_LEPAA_0199	Arthropoda	Insecta	Lepidoptera	Lycaenidae	Polyommatinae		Polyommatus	Polyommatus damon		Yannick Chittaro
GBIFCH-BOL_LEPAA_0200	Arthropoda	Insecta	Lepidoptera	Nymphalidae	Heliconiinae		Issoria	Issoria lathonia		Marie-christine Chittaro
GBIFCH-BOL_LEPAA_0201	Arthropoda	Insecta	Lepidoptera	Nymphalidae	Heliconiinae		Speyeria	Speyeria agalaja		Yannick Chittaro
GBIFCH-BOL_LEPAA_0202	Arthropoda	Insecta	Lepidoptera	Lycaenidae	Polyommatinae		Agriades	Agriades glandon		Yannick Chittaro
GBIFCH-BOL_LEPAA_0203	Arthropoda	Insecta	Lepidoptera	Pieridae	Pierinae		Pieris	Pieris napi		Jerome Pellet
GBIFCH-BOL_LEPAA_0204	Arthropoda	Insecta	Lepidoptera	Pieridae	Pierinae		Pieris	Pieris napi		Michel Baudraz
GBIFCH-BOL_LEPAA_0205	Arthropoda	Insecta	Lepidoptera	Lycaenidae	Theclinae		Favonius	Favonius quercus		Yannick Chittaro
GBIFCH-BOL_LEPAA_0206	Arthropoda	Insecta	Lepidoptera	Nymphalidae	Nymphalinae		Vanessa	Vanessa cardui		Michel Baudraz
GBIFCH-BOL_LEPAA_0207	Arthropoda	Insecta	Lepidoptera	Nymphalidae	Heliconiinae		Argynnis	Argynnis pandora		Yannick Chittaro
GBIFCH-BOL_LEPAA_0208	Arthropoda	Insecta	Lepidoptera	Riodinidae	Nemeobiinae		Hamearis	Hamearis lucina		Marie-christine Chittaro
GBIFCH-BOL_LEPAA_0209	Arthropoda	Insecta	Lepidoptera	Nymphalidae	Nymphalinae		Melitaea	Melitaea phoebe		Yannick Chittaro
GBIFCH-BOL_LEPAA_0210	Arthropoda	Insecta	Lepidoptera	Nymphalidae	Satyrinae		Lasiommata	Lasiommata maera		Andreas Sanchez
GBIFCH-BOL_LEPAA_0211	Arthropoda	Insecta	Lepidoptera	Zygaenidae	Zygaeninae		Zygaena	Zygaena exulans		Yannick Chittaro
GBIFCH-BOL_LEPAA_0212	Arthropoda	Insecta	Lepidoptera	Pieridae	Coliadinae		Colias	Colias palaeno		Andreas Sanchez
GBIFCH-BOL_LEPAA_0213	Arthropoda	Insecta	Lepidoptera	Nymphalidae	Satyrinae		Erebia	Erebia epiphron		Andreas Sanchez
GBIFCH-BOL_LEPAA_0214	Arthropoda	Insecta	Lepidoptera	Lycaenidae	Polyommatinae		Cacyreus	Cacyreus marshalli				captured, identified in hand
GBIFCH-BOL_LEPAA_0215	Arthropoda	Insecta	Lepidoptera	Hesperiidae	Pyrginae		Pyrgus	Pyrgus armoricanus		Paolo Palmi
GBIFCH-BOL_LEPAA_0216	Arthropoda	Insecta	Lepidoptera	Hesperiidae	Pyrginae		Pyrgus	Pyrgus alveus
GBIFCH-BOL_LEPAA_0217	Arthropoda	Insecta	Lepidoptera	Nymphalidae	Satyrinae		Hipparchia	Hipparchia fagi		Yannick Chittaro
GBIFCH-BOL_LEPAA_0218	Arthropoda	Insecta	Lepidoptera	Lycaenidae	Polyommatinae		Cyaniris	Cyaniris semiargus		Yannick Chittaro
GBIFCH-BOL_LEPAA_0219	Arthropoda	Insecta	Lepidoptera	Lycaenidae	Polyommatinae		Cupido	Cupido minimus		Marie-christine Chittaro
GBIFCH-BOL_LEPAA_0220	Arthropoda	Insecta	Lepidoptera	Lycaenidae	Polyommatinae		Cacyreus	Cacyreus marshalli				identified at sight
GBIFCH-BOL_LEPAA_0221	Arthropoda	Insecta	Lepidoptera	Nymphalidae	Satyrinae		Erebia	Erebia christi		Yannick Chittaro
GBIFCH-BOL_LEPAA_0222	Arthropoda	Insecta	Lepidoptera	Nymphalidae	Satyrinae		Erebia	Erebia gorge		Yannick Chittaro
GBIFCH-BOL_LEPAA_0223	Arthropoda	Insecta	Lepidoptera	Nymphalidae	Satyrinae		Erebia	Erebia oeme		Yannick Chittaro
GBIFCH-BOL_LEPAA_0224	Arthropoda	Insecta	Lepidoptera	Nymphalidae	Heliconiinae		Boloria	Boloria aquilonaris		Yannick Chittaro
GBIFCH-BOL_LEPAA_0225	Arthropoda	Insecta	Lepidoptera	Nymphalidae	Heliconiinae		Boloria	Boloria pales		Yannick Chittaro
GBIFCH-BOL_LEPAA_0226	Arthropoda	Insecta	Lepidoptera	Nymphalidae	Heliconiinae		Boloria	Boloria aquilonaris		Yannick Chittaro
GBIFCH-BOL_LEPAA_0227	Arthropoda	Insecta	Lepidoptera	Nymphalidae	Nymphalinae		Euphydryas	Euphydryas cynthia		Yannick Chittaro
GBIFCH-BOL_LEPAA_0228	Arthropoda	Insecta	Lepidoptera	Nymphalidae	Nymphalinae		Euphydryas	Euphydryas aurinia	Euphydryas aurinia glaciegenita	Yannick Chittaro
GBIFCH-BOL_LEPAA_0229	Arthropoda	Insecta	Lepidoptera	Papilionidae	Parnassiinae		Parnassius	Parnassius mnemosyne		Yannick Chittaro
GBIFCH-BOL_LEPAA_0230	Arthropoda	Insecta	Lepidoptera	Nymphalidae	Satyrinae		Satyrus	Satyrus ferula		Yannick Chittaro
GBIFCH-BOL_LEPAA_0231	Arthropoda	Insecta	Lepidoptera	Pieridae	Pierinae		Aporia	Aporia crataegi		Yannick Chittaro
GBIFCH-BOL_LEPAA_0232	Arthropoda	Insecta	Lepidoptera	Nymphalidae	Satyrinae		Erebia	Erebia pronoe	Erebia pronoe vergy	Yannick Chittaro
GBIFCH-BOL_LEPAA_0233	Arthropoda	Insecta	Lepidoptera	Pieridae	Coliadinae		Colias	Colias phicomone		Yannick Chittaro
GBIFCH-BOL_LEPAA_0234	Arthropoda	Insecta	Lepidoptera	Nymphalidae	Nymphalinae		Euphydryas	Euphydryas intermedia		Yannick Chittaro
GBIFCH-BOL_LEPAA_0235	Arthropoda	Insecta	Lepidoptera	Nymphalidae	Heliconiinae		Brenthis	Brenthis ino		Yannick Chittaro
GBIFCH-BOL_LEPAA_0236	Arthropoda	Insecta	Lepidoptera	Nymphalidae	Heliconiinae		Brenthis	Brenthis ino		Yannick Chittaro
GBIFCH-BOL_LEPAA_0237	Arthropoda	Insecta	Lepidoptera	Nymphalidae	Nymphalinae		Melitaea	Melitaea diamina		Yannick Chittaro
GBIFCH-BOL_LEPAA_0238	Arthropoda	Insecta	Lepidoptera	Lycaenidae	Polyommatinae		Polyommatus	Polyommatus escheri		Yannick Chittaro
GBIFCH-BOL_LEPAA_0239	Arthropoda	Insecta	Lepidoptera	Lycaenidae	Polyommatinae		Polyommatus	Polyommatus dorylas		Yannick Chittaro
GBIFCH-BOL_LEPAA_0240	Arthropoda	Insecta	Lepidoptera	Lycaenidae	Polyommatinae		Aricia	Aricia artaxerxes		Yannick Chittaro
GBIFCH-BOL_LEPAA_0241	Arthropoda	Insecta	Lepidoptera	Lycaenidae	Polyommatinae		Agriades	Agriades optilete		Yannick Chittaro
GBIFCH-BOL_LEPAA_0242	Arthropoda	Insecta	Lepidoptera	Nymphalidae	Heliconiinae		Boloria	Boloria titania		Yannick Chittaro
GBIFCH-BOL_LEPAA_0243	Arthropoda	Insecta	Lepidoptera	Nymphalidae	Satyrinae		Erebia	Erebia pronoe		Yannick Chittaro
GBIFCH-BOL_LEPAA_0244	Arthropoda	Insecta	Lepidoptera	Nymphalidae	Satyrinae		Hipparchia	Hipparchia genava		Yannick Chittaro
GBIFCH-BOL_LEPAA_0245	Arthropoda	Insecta	Lepidoptera	Nymphalidae	Satyrinae		Coenonympha	Coenonympha gardetta		Yannick Chittaro
GBIFCH-BOL_LEPAA_0246	Arthropoda	Insecta	Lepidoptera	Hesperiidae	Hesperiinae		Hesperia	Hesperia comma		Yannick Chittaro
GBIFCH-BOL_LEPAA_0247	Arthropoda	Insecta	Lepidoptera	Nymphalidae	Heliconiinae		Fabriciana	Fabriciana niobe		Yannick Chittaro
GBIFCH-BOL_LEPAA_0248	Arthropoda	Insecta	Lepidoptera	Nymphalidae	Heliconiinae		Boloria	Boloria napaea		Yannick Chittaro
GBIFCH-BOL_LEPAA_0249	Arthropoda	Insecta	Lepidoptera	Nymphalidae	Heliconiinae		Brenthis	Brenthis ino		Yannick Chittaro
GBIFCH-BOL_LEPAA_0250	Arthropoda	Insecta	Lepidoptera	Zygaenidae	Zygaeninae		Zygaena	Zygaena ephialtes		Yannick Chittaro
GBIFCH-BOL_LEPAA_0251	Arthropoda	Insecta	Lepidoptera	Hesperiidae	Hesperiinae		Ochlodes	Ochlodes sylvanus		Charlotte Hofmann -. Salamin
GBIFCH-BOL_LEPAA_0252	Arthropoda	Insecta	Lepidoptera	Zygaenidae	Zygaeninae		Zygaena	Zygaena viciae		Yannick Chittaro
GBIFCH-BOL_LEPAA_0253	Arthropoda	Insecta	Lepidoptera	Hesperiidae	Pyrginae		Pyrgus	Pyrgus carlinae		Yannick Chittaro
GBIFCH-BOL_LEPAA_0254	Arthropoda	Insecta	Lepidoptera	Nymphalidae	Nymphalinae		Melitaea	Melitaea varia		Yannick Chittaro
GBIFCH-BOL_LEPAA_0255	Arthropoda	Insecta	Lepidoptera	Lycaenidae	Polyommatinae		Phengaris	Phengaris nausithous		Yannick Chittaro
GBIFCH-BOL_LEPAA_0256	Arthropoda	Insecta	Lepidoptera	Lycaenidae	Polyommatinae		Phengaris	Phengaris arion		Yannick Chittaro
GBIFCH-BOL_LEPAA_0257	Arthropoda	Insecta	Lepidoptera	Lycaenidae	Polyommatinae		Agriades	Agriades glandon		Yannick Chittaro
GBIFCH-BOL_LEPAA_0258	Arthropoda	Insecta	Lepidoptera	Lycaenidae	Polyommatinae		Phengaris	Phengaris teleius		Yannick Chittaro
GBIFCH-BOL_LEPAA_0259	Arthropoda	Insecta	Lepidoptera	Nymphalidae	Limenitidinae		Limenitis	Limenitis reducta		Yannick Chittaro
GBIFCH-BOL_LEPAA_0260	Arthropoda	Insecta	Lepidoptera	Nymphalidae	Satyrinae		Erebia	Erebia pluto		Yannick Chittaro
GBIFCH-BOL_LEPAA_0261	Arthropoda	Insecta	Lepidoptera	Nymphalidae	Satyrinae		Erebia	Erebia mnestra		Yannick Chittaro
GBIFCH-BOL_LEPAA_0262	Arthropoda	Insecta	Lepidoptera	Nymphalidae	Nymphalinae		Nymphalis	Nymphalis polychloros		Yannick Chittaro
GBIFCH-BOL_LEPAA_0263	Arthropoda	Insecta	Lepidoptera	Nymphalidae	Nymphalinae		Nymphalis	Nymphalis polychloros		Yannick Chittaro
GBIFCH-BOL_LEPAA_0264	Arthropoda	Insecta	Lepidoptera	Nymphalidae	Nymphalinae		Aglais	Aglais urticae		Yannick Chittaro
GBIFCH-BOL_LEPAA_0265	Arthropoda	Insecta	Lepidoptera	Nymphalidae	Nymphalinae		Aglais	Aglais urticae		Yannick Chittaro
GBIFCH-BOL_LEPAA_0266	Arthropoda	Insecta	Lepidoptera	Lycaenidae	Polyommatinae		Phengaris	Phengaris arion		Yannick Chittaro
GBIFCH-BOL_LEPAA_0267	Arthropoda	Insecta	Lepidoptera	Lycaenidae	Polyommatinae		Polyommatus	Polyommatus daphnis		Marie-christine Chittaro
GBIFCH-BOL_LEPAA_0268	Arthropoda	Insecta	Lepidoptera	Nymphalidae	Nymphalinae		Polygonia	Polygonia c-album		Yannick Chittaro
GBIFCH-BOL_LEPAA_0269	Arthropoda	Insecta	Lepidoptera	Pieridae	Pierinae		Anthocharis	Anthocharis cardamines		Yannick Chittaro
GBIFCH-BOL_LEPAA_0270	Arthropoda	Insecta	Lepidoptera	Nymphalidae	Nymphalinae		Polygonia	Polygonia c-album		Yannick Chittaro
GBIFCH-BOL_LEPAA_0271	Arthropoda	Insecta	Lepidoptera	Pieridae	Coliadinae		Gonepteryx	Gonepteryx rhamni		Yannick Chittaro
GBIFCH-BOL_LEPAA_0272	Arthropoda	Insecta	Lepidoptera	Papilionidae	Papilioninae		Iphiclides	Iphiclides podalirius		Yannick Chittaro
GBIFCH-BOL_LEPAA_0273	Arthropoda	Insecta	Lepidoptera	Papilionidae	Parnassiinae		Parnassius	Parnassius mnemosyne		Yannick Chittaro
GBIFCH-BOL_LEPAA_0274	Arthropoda	Insecta	Lepidoptera	Pieridae	Pierinae		Aporia	Aporia crataegi		Yannick Chittaro
GBIFCH-BOL_LEPAA_0275	Arthropoda	Insecta	Lepidoptera	Papilionidae	Papilioninae		Iphiclides	Iphiclides podalirius		Yannick Chittaro
GBIFCH-BOL_LEPAA_0276	Arthropoda	Insecta	Lepidoptera	Papilionidae	Papilioninae		Papilio	Papilio machaon		Yannick Chittaro
GBIFCH-BOL_LEPAA_0277	Arthropoda	Insecta	Lepidoptera	Pieridae	Coliadinae		Colias	Colias croceus		Yannick Chittaro
GBIFCH-BOL_LEPAA_0278	Arthropoda	Insecta	Lepidoptera	Pieridae	Coliadinae		Colias	Colias hyale		Yannick Chittaro
GBIFCH-BOL_LEPAA_0279	Arthropoda	Insecta	Lepidoptera	Pieridae	Coliadinae		Colias	Colias alfacariensis		Yannick Chittaro
GBIFCH-BOL_LEPAA_0280	Arthropoda	Insecta	Lepidoptera	Pieridae	Pierinae		Pontia	Pontia edusa		Yannick Chittaro
GBIFCH-BOL_LEPAA_0281	Arthropoda	Insecta	Lepidoptera	Pieridae	Pierinae		Pieris	Pieris rapae		Yannick Chittaro
GBIFCH-BOL_LEPAA_0282	Arthropoda	Insecta	Lepidoptera	Pieridae	Pierinae		Pieris	Pieris napi		Yannick Chittaro
GBIFCH-BOL_LEPAA_0283	Arthropoda	Insecta	Lepidoptera	Papilionidae	Parnassiinae		Parnassius	Parnassius apollo		Peter Sonderegger	petersonderegger@bluewin.ch
GBIFCH-BOL_LEPAA_0284	Arthropoda	Insecta	Lepidoptera	Nymphalidae	Nymphalinae		Nymphalis	Nymphalis antiopa		Peter Sonderegger	petersonderegger@bluewin.ch
GBIFCH-BOL_LEPAA_0285	Arthropoda	Insecta	Lepidoptera	Nymphalidae	Nymphalinae		Nymphalis	Nymphalis polychloros		Peter Sonderegger	petersonderegger@bluewin.ch
GBIFCH-BOL_LEPAA_0286	Arthropoda	Insecta	Lepidoptera	Nymphalidae	Nymphalinae		Vanessa	Vanessa atalanta		Peter Sonderegger	petersonderegger@bluewin.ch
GBIFCH-BOL_LEPAA_0287	Arthropoda	Insecta	Lepidoptera	Nymphalidae	Nymphalinae		Vanessa	Vanessa cardui		Peter Sonderegger	petersonderegger@bluewin.ch
GBIFCH-BOL_LEPAA_0288	Arthropoda	Insecta	Lepidoptera	Nymphalidae	Satyrinae		Minois	Minois dryas		Peter Sonderegger	petersonderegger@bluewin.ch
GBIFCH-BOL_LEPAA_0289	Arthropoda	Insecta	Lepidoptera	Pieridae	Pierinae		Aporia	Aporia crataegi		Peter Sonderegger	petersonderegger@bluewin.ch
GBIFCH-BOL_LEPAA_0290	Arthropoda	Insecta	Lepidoptera	Pieridae	Pierinae		Pieris	Pieris brassicae		Peter Sonderegger	petersonderegger@bluewin.ch
GBIFCH-BOL_LEPAA_0291	Arthropoda	Insecta	Lepidoptera	Nymphalidae	Satyrinae		Coenonympha	Coenonympha pamphilus		Peter Sonderegger	petersonderegger@bluewin.ch
GBIFCH-BOL_LEPAA_0292	Arthropoda	Insecta	Lepidoptera	Hesperiidae	Pyrginae		Erynnis	Erynnis tages		Peter Sonderegger	petersonderegger@bluewin.ch
GBIFCH-BOL_LEPAA_0293	Arthropoda	Insecta	Lepidoptera	Zygaenidae	Procridinae		Adscita	Adscita alpina		Raymond Guenin		identified by genitalia, anatomically
GBIFCH-BOL_LEPAA_0294	Arthropoda	Insecta	Lepidoptera	Nymphalidae	Heliconiinae		Fabriciana	Fabriciana adippe		Peter Sonderegger	petersonderegger@bluewin.ch
GBIFCH-BOL_LEPAA_0295	Arthropoda	Insecta	Lepidoptera	Nymphalidae	Heliconiinae		Argynnis	Argynnis paphia		Peter Sonderegger	petersonderegger@bluewin.ch
GBIFCH-BOL_LEPAA_0296	Arthropoda	Insecta	Lepidoptera	Nymphalidae	Heliconiinae		Fabriciana	Fabriciana niobe		Peter Sonderegger	petersonderegger@bluewin.ch
GBIFCH-BOL_LEPAA_0297	Arthropoda	Insecta	Lepidoptera	Nymphalidae	Heliconiinae		Speyeria	Speyeria agalaja		Peter Sonderegger	petersonderegger@bluewin.ch
GBIFCH-BOL_LEPAA_0298	Arthropoda	Insecta	Lepidoptera	Pieridae	Coliadinae		Colias	Colias croceus		Peter Sonderegger	petersonderegger@bluewin.ch
GBIFCH-BOL_LEPAA_0299	Arthropoda	Insecta	Lepidoptera	Pieridae	Pierinae		Pieris	Pieris napi		Peter Sonderegger	petersonderegger@bluewin.ch
GBIFCH-BOL_LEPAA_0300	Arthropoda	Insecta	Lepidoptera	Nymphalidae	Satyrinae		Maniola	Maniola jurtina		Peter Sonderegger	petersonderegger@bluewin.ch
GBIFCH-BOL_LEPAA_0301	Arthropoda	Insecta	Lepidoptera	Nymphalidae	Satyrinae		Pararge	Pararge aegeria		Peter Sonderegger	petersonderegger@bluewin.ch
GBIFCH-BOL_LEPAA_0302	Arthropoda	Insecta	Lepidoptera	Nymphalidae	Nymphalinae		Melitaea	Melitaea nevadensis		Peter Sonderegger	petersonderegger@bluewin.ch	identified by genitalia, anatomically
GBIFCH-BOL_LEPAA_0303	Arthropoda	Insecta	Lepidoptera	Nymphalidae	Nymphalinae		Melitaea	Melitaea nevadensis		Peter Sonderegger	petersonderegger@bluewin.ch
GBIFCH-BOL_LEPAA_0304	Arthropoda	Insecta	Lepidoptera	Nymphalidae	Satyrinae		Coenonympha	Coenonympha darwiniana		Peter Sonderegger	petersonderegger@bluewin.ch
GBIFCH-BOL_LEPAA_0305	Arthropoda	Insecta	Lepidoptera	Nymphalidae	Satyrinae		Coenonympha	Coenonympha darwiniana		Peter Sonderegger	petersonderegger@bluewin.ch
GBIFCH-BOL_LEPAA_0306	Arthropoda	Insecta	Lepidoptera	Nymphalidae	Satyrinae		Coenonympha	Coenonympha darwiniana		Peter Sonderegger	petersonderegger@bluewin.ch
GBIFCH-BOL_LEPAA_0307	Arthropoda	Insecta	Lepidoptera	Lycaenidae	Lycaeninae		Lycaena	Lycaena phlaeas		Peter Sonderegger	petersonderegger@bluewin.ch
GBIFCH-BOL_LEPAA_0308	Arthropoda	Insecta	Lepidoptera	Nymphalidae	Heliconiinae		Fabriciana	Fabriciana niobe		Peter Sonderegger	petersonderegger@bluewin.ch
GBIFCH-BOL_LEPAA_0309	Arthropoda	Insecta	Lepidoptera	Nymphalidae	Heliconiinae		Fabriciana	Fabriciana adippe		Peter Sonderegger	petersonderegger@bluewin.ch
GBIFCH-BOL_LEPAA_0310	Arthropoda	Insecta	Lepidoptera	Nymphalidae	Satyrinae		Erebia	Erebia triaria		Peter Sonderegger	petersonderegger@bluewin.ch
GBIFCH-BOL_LEPAA_0311	Arthropoda	Insecta	Lepidoptera	Nymphalidae	Satyrinae		Erebia	Erebia montana		Peter Sonderegger	petersonderegger@bluewin.ch
GBIFCH-BOL_LEPAA_0312	Arthropoda	Insecta	Lepidoptera	Nymphalidae	Satyrinae		Erebia	Erebia pronoe	Erebia pronoe psathura	Peter Sonderegger	petersonderegger@bluewin.ch
GBIFCH-BOL_LEPAA_0313	Arthropoda	Insecta	Lepidoptera	Nymphalidae	Satyrinae		Erebia	Erebia aethiops		Peter Sonderegger	petersonderegger@bluewin.ch
GBIFCH-BOL_LEPAA_0314	Arthropoda	Insecta	Lepidoptera	Nymphalidae	Satyrinae		Erebia	Erebia tyndarus		Peter Sonderegger	petersonderegger@bluewin.ch
GBIFCH-BOL_LEPAA_0315	Arthropoda	Insecta	Lepidoptera	Nymphalidae	Satyrinae		Erebia	Erebia alberganus		Peter Sonderegger	petersonderegger@bluewin.ch
GBIFCH-BOL_LEPAA_0316	Arthropoda	Insecta	Lepidoptera	Nymphalidae	Heliconiinae		Boloria	Boloria euphrosyne		Peter Sonderegger	petersonderegger@bluewin.ch
GBIFCH-BOL_LEPAA_0317	Arthropoda	Insecta	Lepidoptera	Hesperiidae	Hesperiinae		Ochlodes	Ochlodes sylvanus		Peter Sonderegger	petersonderegger@bluewin.ch
GBIFCH-BOL_LEPAA_0318	Arthropoda	Insecta	Lepidoptera	Nymphalidae	Heliconiinae		Issoria	Issoria lathonia		Peter Sonderegger	petersonderegger@bluewin.ch
GBIFCH-BOL_LEPAA_0319	Arthropoda	Insecta	Lepidoptera	Nymphalidae	Satyrinae		Coenonympha	Coenonympha arcania		Peter Sonderegger	petersonderegger@bluewin.ch
GBIFCH-BOL_LEPAA_0320	Arthropoda	Insecta	Lepidoptera	Pieridae	Pierinae		Pieris	Pieris napi		Peter Sonderegger	petersonderegger@bluewin.ch
GBIFCH-BOL_LEPAA_0321	Arthropoda	Insecta	Lepidoptera	Nymphalidae	Satyrinae		Pararge	Pararge aegeria		Peter Sonderegger	petersonderegger@bluewin.ch
GBIFCH-BOL_LEPAA_0322	Arthropoda	Insecta	Lepidoptera	Nymphalidae	Satyrinae		Minois	Minois dryas		Peter Sonderegger	petersonderegger@bluewin.ch
GBIFCH-BOL_LEPAA_0323	Arthropoda	Insecta	Lepidoptera	Pieridae	Coliadinae		Colias	Colias croceus		Peter Sonderegger	petersonderegger@bluewin.ch
GBIFCH-BOL_LEPAA_0324	Arthropoda	Insecta	Lepidoptera	Nymphalidae	Satyrinae		Melanargia	Melanargia galathea		Peter Sonderegger	petersonderegger@bluewin.ch
GBIFCH-BOL_LEPAA_0325	Arthropoda	Insecta	Lepidoptera	Nymphalidae	Satyrinae		Hipparchia	Hipparchia fagi		Peter Sonderegger	petersonderegger@bluewin.ch
GBIFCH-BOL_LEPAA_0326	Arthropoda	Insecta	Lepidoptera	Pieridae	Pierinae		Aporia	Aporia crataegi		Peter Sonderegger	petersonderegger@bluewin.ch
GBIFCH-BOL_LEPAA_0327	Arthropoda	Insecta	Lepidoptera	Lycaenidae	Polyommatinae		Cacyreus	Cacyreus marshalli		Peter Sonderegger	petersonderegger@bluewin.ch
GBIFCH-BOL_LEPAA_0328	Arthropoda	Insecta	Lepidoptera	Lycaenidae	Polyommatinae		Celastrina	Celastrina argiolus		Peter Sonderegger	petersonderegger@bluewin.ch
GBIFCH-BOL_LEPAA_0329	Arthropoda	Insecta	Lepidoptera	Nymphalidae	Satyrinae		Erebia	Erebia euryale		Peter Sonderegger	petersonderegger@bluewin.ch
GBIFCH-BOL_LEPAA_0330	Arthropoda	Insecta	Lepidoptera	Nymphalidae	Satyrinae		Erebia	Erebia medusa		Peter Sonderegger	petersonderegger@bluewin.ch	identified by genitalia, anatomically
GBIFCH-BOL_LEPAA_0331	Arthropoda	Insecta	Lepidoptera	Nymphalidae	Satyrinae		Erebia	Erebia pronoe	Erebia pronoe psathura	Peter Sonderegger	petersonderegger@bluewin.ch
GBIFCH-BOL_LEPAA_0332	Arthropoda	Insecta	Lepidoptera	Nymphalidae	Satyrinae		Erebia	Erebia tyndarus		Peter Sonderegger	petersonderegger@bluewin.ch	identified by genitalia, anatomically
GBIFCH-BOL_LEPAA_0333	Arthropoda	Insecta	Lepidoptera	Nymphalidae	Satyrinae		Coenonympha	Coenonympha darwiniana		Peter Sonderegger	petersonderegger@bluewin.ch
GBIFCH-BOL_LEPAA_0334	Arthropoda	Insecta	Lepidoptera	Nymphalidae	Satyrinae		Coenonympha	Coenonympha darwiniana		Peter Sonderegger	petersonderegger@bluewin.ch
GBIFCH-BOL_LEPAA_0335	Arthropoda	Insecta	Lepidoptera	Nymphalidae	Satyrinae		Coenonympha	Coenonympha darwiniana		Peter Sonderegger	petersonderegger@bluewin.ch
GBIFCH-BOL_LEPAA_0336	Arthropoda	Insecta	Lepidoptera	Zygaenidae	Zygaeninae		Zygaena	Zygaena purpuralis		Raymond Guenin
GBIFCH-BOL_LEPAA_0337	Arthropoda	Insecta	Lepidoptera	Zygaenidae	Procridinae		Adscita	Adscita geryon		Raymond Guenin		identified by genitalia, anatomically
GBIFCH-BOL_LEPAA_0338	Arthropoda	Insecta	Lepidoptera	Zygaenidae	Procridinae		Adscita	Adscita alpina		Raymond Guenin		identified by genitalia, anatomically
GBIFCH-BOL_LEPAA_0339	Arthropoda	Insecta	Lepidoptera	Nymphalidae	Satyrinae		Erebia	Erebia pandrose		Yannick Chittaro
GBIFCH-BOL_LEPAA_0340	Arthropoda	Insecta	Lepidoptera	Nymphalidae	Satyrinae		Lasiommata	Lasiommata megera		Yannick Chittaro
GBIFCH-BOL_LEPAA_0341	Arthropoda	Insecta	Lepidoptera	Nymphalidae	Satyrinae		Erebia	Erebia aethiops		Yannick Chittaro
GBIFCH-BOL_LEPAA_0342	Arthropoda	Insecta	Lepidoptera	Nymphalidae	Satyrinae		Erebia	Erebia gorge		Yannick Chittaro
GBIFCH-BOL_LEPAA_0343	Arthropoda	Insecta	Lepidoptera	Nymphalidae	Satyrinae		Erebia	Erebia alberganus		Yannick Chittaro
GBIFCH-BOL_LEPAA_0344	Arthropoda	Insecta	Lepidoptera	Lycaenidae	Theclinae		Callophrys	Callophrys rubi		Yannick Chittaro
GBIFCH-BOL_LEPAA_0345	Arthropoda	Insecta	Lepidoptera	Zygaenidae	Zygaeninae		Zygaena	Zygaena transalpina		Yannick Chittaro
GBIFCH-BOL_LEPAA_0346	Arthropoda	Insecta	Lepidoptera	Zygaenidae	Zygaeninae		Zygaena	Zygaena lonicerae		Yannick Chittaro
GBIFCH-BOL_LEPAA_0347	Arthropoda	Insecta	Lepidoptera	Lycaenidae	Polyommatinae		Phengaris	Phengaris nausithous		Michel Baudraz
GBIFCH-BOL_LEPAA_0348	Arthropoda	Insecta	Lepidoptera	Lycaenidae	Polyommatinae		Polyommatus	Polyommatus icarus		Yannick Chittaro
GBIFCH-BOL_LEPAA_0349	Arthropoda	Insecta	Lepidoptera	Lycaenidae	Polyommatinae		Cupido	Cupido osiris		Yannick Chittaro
GBIFCH-BOL_LEPAA_0350	Arthropoda	Insecta	Lepidoptera	Lycaenidae	Polyommatinae		Aricia	Aricia artaxerxes		Yannick Chittaro
GBIFCH-BOL_LEPAA_0351	Arthropoda	Insecta	Lepidoptera	Hesperiidae	Hesperiinae		Thymelicus	Thymelicus lineola		Yannick Chittaro
GBIFCH-BOL_LEPAA_0352	Arthropoda	Insecta	Lepidoptera	Lycaenidae	Polyommatinae		Cyaniris	Cyaniris semiargus		Yannick Chittaro
GBIFCH-BOL_LEPAA_0353	Arthropoda	Insecta	Lepidoptera	Hesperiidae	Pyrginae		Carcharodus	Carcharodus alceae		Nicola Zambelli
GBIFCH-BOL_LEPAA_0354	Arthropoda	Insecta	Lepidoptera	Lycaenidae	Polyommatinae		Agriades	Agriades optilete		Nicola Zambelli
GBIFCH-BOL_LEPAA_0355	Arthropoda	Insecta	Lepidoptera	Pieridae	Pierinae		Pieris	Pieris napi		Kathrin Hartmann Walter
GBIFCH-BOL_LEPAA_0356	Arthropoda	Insecta	Lepidoptera	Hesperiidae	Pyrginae		Pyrgus	Pyrgus warrenensis		Yannick Chittaro		identified by genitalia, anatomically
GBIFCH-BOL_LEPAA_0357	Arthropoda	Insecta	Lepidoptera	Hesperiidae	Pyrginae		Pyrgus	Pyrgus andromedae		Yannick Chittaro		identified by genitalia, anatomically
GBIFCH-BOL_LEPAA_0358	Arthropoda	Insecta	Lepidoptera	Lycaenidae	Polyommatinae		Aricia	Aricia artaxerxes
GBIFCH-BOL_LEPAA_0359	Arthropoda	Insecta	Lepidoptera	Nymphalidae	Heliconiinae		Boloria	Boloria pales				captured, identified in hand
GBIFCH-BOL_LEPAA_0360	Arthropoda	Insecta	Lepidoptera	Hesperiidae	Pyrginae		Carcharodus	Carcharodus floccifera				captured, identified in hand
GBIFCH-BOL_LEPAA_0361	Arthropoda	Insecta	Lepidoptera	Nymphalidae	Satyrinae		Coenonympha	Coenonympha gardetta				captured, identified in hand
GBIFCH-BOL_LEPAA_0362	Arthropoda	Insecta	Lepidoptera	Nymphalidae	Nymphalinae		Vanessa	Vanessa cardui				captured, identified in hand
GBIFCH-BOL_LEPAA_0363	Arthropoda	Insecta	Lepidoptera	Nymphalidae	Heliconiinae		Boloria	Boloria titania				captured, identified in hand
GBIFCH-BOL_LEPAA_0364	Arthropoda	Insecta	Lepidoptera	Nymphalidae	Satyrinae		Maniola	Maniola jurtina				captured, identified in hand
GBIFCH-BOL_LEPAA_0365	Arthropoda	Insecta	Lepidoptera	Lycaenidae	Polyommatinae		Polyommatus	Polyommatus damon				captured, identified in hand
GBIFCH-BOL_LEPAA_0366	Arthropoda	Insecta	Lepidoptera	Hesperiidae	Heteropterinae		Carterocephalus	Carterocephalus palaemon				captured, identified in hand
GBIFCH-BOL_LEPAA_0367	Arthropoda	Insecta	Lepidoptera	Hesperiidae	Hesperiinae		Ochlodes	Ochlodes sylvanus				captured, identified in hand
GBIFCH-BOL_LEPAA_0368	Arthropoda	Insecta	Lepidoptera	Hesperiidae	Pyrginae		Spialia	Spialia sertorius				captured, identified in hand
GBIFCH-BOL_LEPAA_0369	Arthropoda	Insecta	Lepidoptera	Nymphalidae	Satyrinae		Aphantopus	Aphantopus hyperantus				captured, identified in hand
GBIFCH-BOL_LEPAA_0370	Arthropoda	Insecta	Lepidoptera	Nymphalidae	Satyrinae		Coenonympha	Coenonympha pamphilus				captured, identified in hand
GBIFCH-BOL_LEPAA_0371	Arthropoda	Insecta	Lepidoptera	Nymphalidae	Satyrinae		Melanargia	Melanargia galathea				captured, identified in hand
GBIFCH-BOL_LEPAA_0372	Arthropoda	Insecta	Lepidoptera	Lycaenidae	Polyommatinae		Polyommatus	Polyommatus icarus				captured, identified in hand
GBIFCH-BOL_LEPAA_0373	Arthropoda	Insecta	Lepidoptera	Nymphalidae	Heliconiinae		Boloria	Boloria aquilonaris				captured, identified in hand
GBIFCH-BOL_LEPAA_0374	Arthropoda	Insecta	Lepidoptera	Nymphalidae	Satyrinae		Maniola	Maniola jurtina				captured, identified in hand
GBIFCH-BOL_LEPAA_0375	Arthropoda	Insecta	Lepidoptera	Lycaenidae	Polyommatinae		Polyommatus	Polyommatus eros				captured, identified in hand
GBIFCH-BOL_LEPAA_0376	Arthropoda	Insecta	Lepidoptera	Lycaenidae	Theclinae		Callophrys	Callophrys rubi				captured, identified in hand
GBIFCH-BOL_LEPAA_0377	Arthropoda	Insecta	Lepidoptera	Hesperiidae	Hesperiinae		Thymelicus	Thymelicus sylvestris				captured, identified in hand
GBIFCH-BOL_LEPAA_0378	Arthropoda	Insecta	Lepidoptera	Nymphalidae	Nymphalinae		Euphydryas	Euphydryas aurinia	Euphydryas aurinia aurinia
GBIFCH-BOL_LEPAA_0379	Arthropoda	Insecta	Lepidoptera	Lycaenidae	Lycaeninae		Lycaena	Lycaena hippothoe	Lycaena hippothoe eurydice	Yannick Chittaro
GBIFCH-BOL_LEPAA_0380	Arthropoda	Insecta	Lepidoptera	Nymphalidae	Heliconiinae		Boloria	Boloria selene				captured, identified in hand
GBIFCH-BOL_LEPAA_0381	Arthropoda	Insecta	Lepidoptera	Hesperiidae	Pyrginae		Pyrgus	Pyrgus carlinae		Yannick Chittaro		identified by genitalia, anatomically
GBIFCH-BOL_LEPAA_0382	Arthropoda	Insecta	Lepidoptera	Lycaenidae	Polyommatinae		Polyommatus	Polyommatus eros		Yannick Chittaro
GBIFCH-BOL_LEPAA_0383	Arthropoda	Insecta	Lepidoptera	Pieridae	Dismorphiinae		Leptidea	Leptidea sinapis		Yannick Chittaro		identified by genitalia, anatomically
GBIFCH-BOL_LEPAA_0384	Arthropoda	Insecta	Lepidoptera	Pieridae	Coliadinae		Colias	Colias alfacariensis		Yannick Chittaro
GBIFCH-BOL_LEPAA_0385	Arthropoda	Insecta	Lepidoptera	Nymphalidae	Satyrinae		Erebia	Erebia eriphyle		Peter Sonderegger	petersonderegger@bluewin.ch
GBIFCH-BOL_LEPAA_0386	Arthropoda	Insecta	Lepidoptera	Nymphalidae	Satyrinae		Erebia	Erebia eriphyle		Peter Sonderegger	petersonderegger@bluewin.ch
GBIFCH-BOL_LEPAA_0387	Arthropoda	Insecta	Lepidoptera	Zygaenidae	Procridinae		Adscita	Adscita geryon		Raymond Guenin		identified by genitalia, anatomically
GBIFCH-BOL_LEPAA_0388	Arthropoda	Insecta	Lepidoptera	Zygaenidae	Procridinae		Adscita	Adscita geryon		Raymond Guenin		identified by genitalia, anatomically
GBIFCH-BOL_LEPAA_0389	Arthropoda	Insecta	Lepidoptera	Zygaenidae	Procridinae		Adscita	Adscita statices		Raymond Guenin		identified by genitalia, anatomically
GBIFCH-BOL_LEPAA_0390	Arthropoda	Insecta	Lepidoptera	Lycaenidae	Polyommatinae		Polyommatus	Polyommatus thersites		Peter Sonderegger	petersonderegger@bluewin.ch	identified by genitalia, anatomically
GBIFCH-BOL_LEPAA_0391	Arthropoda	Insecta	Lepidoptera	Nymphalidae	Satyrinae		Erebia	Erebia eriphyle		Peter Sonderegger	petersonderegger@bluewin.ch
GBIFCH-BOL_LEPAA_0392	Arthropoda	Insecta	Lepidoptera	Nymphalidae	Satyrinae		Erebia	Erebia eriphyle		Peter Sonderegger	petersonderegger@bluewin.ch	identified by genitalia, anatomically
GBIFCH-BOL_LEPAA_0393	Arthropoda	Insecta	Lepidoptera	Lycaenidae	Polyommatinae		Plebejus	Plebejus idas		Peter Sonderegger	petersonderegger@bluewin.ch	identified by genitalia, anatomically
GBIFCH-BOL_LEPAA_0394	Arthropoda	Insecta	Lepidoptera	Nymphalidae	Nymphalinae		Melitaea	Melitaea athalia		Peter Sonderegger	petersonderegger@bluewin.ch
GBIFCH-BOL_LEPAA_0395	Arthropoda	Insecta	Lepidoptera	Nymphalidae	Nymphalinae		Melitaea	Melitaea aurelia		Peter Sonderegger	petersonderegger@bluewin.ch
GBIFCH-BOL_LEPAA_0396	Arthropoda	Insecta	Lepidoptera	Lycaenidae	Polyommatinae		Plebejus	Plebejus idas		Peter Sonderegger	petersonderegger@bluewin.ch	identified by morphological criteria
GBIFCH-BOL_LEPAA_0397	Arthropoda	Insecta	Lepidoptera	Lycaenidae	Polyommatinae		Plebejus	Plebejus idas		Peter Sonderegger	petersonderegger@bluewin.ch	identified by morphological criteria
GBIFCH-BOL_LEPAA_0398	Arthropoda	Insecta	Lepidoptera	Nymphalidae	Satyrinae		Coenonympha	Coenonympha darwiniana		Peter Sonderegger	petersonderegger@bluewin.ch
GBIFCH-BOL_LEPAA_0399	Arthropoda	Insecta	Lepidoptera	Zygaenidae	Zygaeninae		Zygaena	Zygaena purpuralis		Raymond Guenin
GBIFCH-BOL_LEPAA_0400	Arthropoda	Insecta	Lepidoptera	Zygaenidae	Zygaeninae		Zygaena	Zygaena purpuralis		Raymond Guenin		identified by genitalia, anatomically
GBIFCH-BOL_LEPAA_0401	Arthropoda	Insecta	Lepidoptera	Zygaenidae	Zygaeninae		Zygaena	Zygaena purpuralis		Raymond Guenin
GBIFCH-BOL_LEPAA_0402	Arthropoda	Insecta	Lepidoptera	Zygaenidae	Procridinae		Adscita	Adscita geryon		Raymond Guenin		identified by genitalia, anatomically
GBIFCH-BOL_LEPAA_0403	Arthropoda	Insecta	Lepidoptera	Zygaenidae	Procridinae		Adscita	Adscita geryon		Raymond Guenin		identified by genitalia, anatomically
GBIFCH-BOL_LEPAA_0404	Arthropoda	Insecta	Lepidoptera	Nymphalidae	Heliconiinae		Brenthis	Brenthis ino		Peter Sonderegger	petersonderegger@bluewin.ch
GBIFCH-BOL_LEPAA_0405	Arthropoda	Insecta	Lepidoptera	Nymphalidae	Nymphalinae		Melitaea	Melitaea diamina		Peter Sonderegger	petersonderegger@bluewin.ch
GBIFCH-BOL_LEPAA_0406	Arthropoda	Insecta	Lepidoptera	Hesperiidae	Hesperiinae		Ochlodes	Ochlodes sylvanus		Peter Sonderegger	petersonderegger@bluewin.ch
GBIFCH-BOL_LEPAA_0407	Arthropoda	Insecta	Lepidoptera	Zygaenidae	Zygaeninae		Zygaena	Zygaena filipendulae		Raymond Guenin
GBIFCH-BOL_LEPAA_0408	Arthropoda	Insecta	Lepidoptera	Nymphalidae	Nymphalinae		Melitaea	Melitaea athalia		Yannick Chittaro		identified by genitalia, anatomically
GBIFCH-BOL_LEPAA_0409	Arthropoda	Insecta	Lepidoptera	Zygaenidae	Zygaeninae		Zygaena	Zygaena viciae		Raymond Guenin
GBIFCH-BOL_LEPAA_0410	Arthropoda	Insecta	Lepidoptera	Hesperiidae	Hesperiinae		Hesperia	Hesperia comma		Peter Sonderegger	petersonderegger@bluewin.ch
GBIFCH-BOL_LEPAA_0411	Arthropoda	Insecta	Lepidoptera	Nymphalidae	Satyrinae		Erebia	Erebia aethiops		Peter Sonderegger	petersonderegger@bluewin.ch
GBIFCH-BOL_LEPAA_0412	Arthropoda	Insecta	Lepidoptera	Lycaenidae	Polyommatinae		Polyommatus	Polyommatus icarus		Peter Sonderegger	petersonderegger@bluewin.ch
GBIFCH-BOL_LEPAA_0413	Arthropoda	Insecta	Lepidoptera	Hesperiidae	Hesperiinae		Thymelicus	Thymelicus sylvestris		Yannick Chittaro
GBIFCH-BOL_LEPAA_0414	Arthropoda	Insecta	Lepidoptera	Hesperiidae	Hesperiinae		Thymelicus	Thymelicus sylvestris		Peter Sonderegger	petersonderegger@bluewin.ch
GBIFCH-BOL_LEPAA_0415	Arthropoda	Insecta	Lepidoptera	Nymphalidae	Satyrinae		Erebia	Erebia medusa		Peter Sonderegger	petersonderegger@bluewin.ch
GBIFCH-BOL_LEPAA_0416	Arthropoda	Insecta	Lepidoptera	Hesperiidae	Hesperiinae		Ochlodes	Ochlodes sylvanus		Peter Sonderegger	petersonderegger@bluewin.ch
GBIFCH-BOL_LEPAA_0417	Arthropoda	Insecta	Lepidoptera	Nymphalidae	Satyrinae		Erebia	Erebia ligea		Peter Sonderegger	petersonderegger@bluewin.ch
GBIFCH-BOL_LEPAA_0418	Arthropoda	Insecta	Lepidoptera	Hesperiidae	Pyrginae		Erynnis	Erynnis tages		Peter Sonderegger	petersonderegger@bluewin.ch
GBIFCH-BOL_LEPAA_0419	Arthropoda	Insecta	Lepidoptera	Lycaenidae	Polyommatinae		Plebejus	Plebejus argus		Peter Sonderegger	petersonderegger@bluewin.ch	identified by morphological criteria
GBIFCH-BOL_LEPAA_0420	Arthropoda	Insecta	Lepidoptera	Zygaenidae	Procridinae		Adscita	Adscita statices		Raymond Guenin		identified by genitalia, anatomically
GBIFCH-BOL_LEPAA_0421	Arthropoda	Insecta	Lepidoptera	Hesperiidae	Pyrginae		Pyrgus	Pyrgus alveus		Peter Sonderegger	petersonderegger@bluewin.ch
GBIFCH-BOL_LEPAA_0422	Arthropoda	Insecta	Lepidoptera	Hesperiidae	Pyrginae		Pyrgus	Pyrgus malvoides		Peter Sonderegger	petersonderegger@bluewin.ch	identified by genitalia, anatomically
GBIFCH-BOL_LEPAA_0423	Arthropoda	Insecta	Lepidoptera	Hesperiidae	Pyrginae		Pyrgus	Pyrgus serratulae		Peter Sonderegger	petersonderegger@bluewin.ch
GBIFCH-BOL_LEPAA_0424	Arthropoda	Insecta	Lepidoptera	Nymphalidae	Heliconiinae		Brenthis	Brenthis daphne		Peter Sonderegger	petersonderegger@bluewin.ch
GBIFCH-BOL_LEPAA_0425	Arthropoda	Insecta	Lepidoptera	Nymphalidae	Satyrinae		Melanargia	Melanargia galathea		Peter Sonderegger	petersonderegger@bluewin.ch
GBIFCH-BOL_LEPAA_0426	Arthropoda	Insecta	Lepidoptera	Nymphalidae	Satyrinae		Minois	Minois dryas		Peter Sonderegger	petersonderegger@bluewin.ch
GBIFCH-BOL_LEPAA_0427	Arthropoda	Insecta	Lepidoptera	Hesperiidae	Hesperiinae		Thymelicus	Thymelicus acteon		Peter Sonderegger	petersonderegger@bluewin.ch
GBIFCH-BOL_LEPAA_0428	Arthropoda	Insecta	Lepidoptera	Lycaenidae	Polyommatinae		Polyommatus	Polyommatus thersites		Peter Sonderegger	petersonderegger@bluewin.ch
GBIFCH-BOL_LEPAA_0429	Arthropoda	Insecta	Lepidoptera	Pieridae	Pierinae		Pieris	Pieris brassicae		Peter Sonderegger	petersonderegger@bluewin.ch
GBIFCH-BOL_LEPAA_0430	Arthropoda	Insecta	Lepidoptera	Pieridae	Coliadinae		Colias	Colias alfacariensis		Yannick Chittaro
GBIFCH-BOL_LEPAA_0431	Arthropoda	Insecta	Lepidoptera	Zygaenidae	Zygaeninae		Zygaena	Zygaena loti		Raymond Guenin
GBIFCH-BOL_LEPAA_0432	Arthropoda	Insecta	Lepidoptera	Zygaenidae	Zygaeninae		Zygaena	Zygaena lonicerae		Raymond Guenin
GBIFCH-BOL_LEPAA_0433	Arthropoda	Insecta	Lepidoptera	Lycaenidae	Theclinae		Favonius	Favonius quercus		Peter Sonderegger	petersonderegger@bluewin.ch
GBIFCH-BOL_LEPAA_0434	Arthropoda	Insecta	Lepidoptera	Pieridae	Pierinae		Pieris	Pieris bryoniae		Peter Sonderegger	petersonderegger@bluewin.ch
GBIFCH-BOL_LEPAA_0435	Arthropoda	Insecta	Lepidoptera	Pieridae	Pierinae		Anthocharis	Anthocharis cardamines		Peter Sonderegger	petersonderegger@bluewin.ch
GBIFCH-BOL_LEPAA_0436	Arthropoda	Insecta	Lepidoptera	Nymphalidae	Nymphalinae		Melitaea	Melitaea athalia		Peter Sonderegger	petersonderegger@bluewin.ch
GBIFCH-BOL_LEPAA_0437	Arthropoda	Insecta	Lepidoptera	Pieridae	Pierinae		Pieris	Pieris mannii		Peter Sonderegger	petersonderegger@bluewin.ch
GBIFCH-BOL_LEPAA_0438	Arthropoda	Insecta	Lepidoptera	Hesperiidae	Hesperiinae		Ochlodes	Ochlodes sylvanus		Peter Sonderegger	petersonderegger@bluewin.ch
GBIFCH-BOL_LEPAA_0439	Arthropoda	Insecta	Lepidoptera	Nymphalidae	Satyrinae		Lasiommata	Lasiommata maera		Peter Sonderegger	petersonderegger@bluewin.ch
GBIFCH-BOL_LEPAA_0440	Arthropoda	Insecta	Lepidoptera	Nymphalidae	Satyrinae		Erebia	Erebia melampus		Peter Sonderegger	petersonderegger@bluewin.ch
GBIFCH-BOL_LEPAA_0441	Arthropoda	Insecta	Lepidoptera	Nymphalidae	Satyrinae		Erebia	Erebia aethiops		Peter Sonderegger	petersonderegger@bluewin.ch
GBIFCH-BOL_LEPAA_0442	Arthropoda	Insecta	Lepidoptera	Lycaenidae	Polyommatinae		Plebejus	Plebejus argus		Peter Sonderegger	petersonderegger@bluewin.ch	identified by morphological criteria
GBIFCH-BOL_LEPAA_0443	Arthropoda	Insecta	Lepidoptera	Nymphalidae	Satyrinae		Erebia	Erebia meolans		Peter Sonderegger	petersonderegger@bluewin.ch
GBIFCH-BOL_LEPAA_0444	Arthropoda	Insecta	Lepidoptera	Nymphalidae	Satyrinae		Erebia	Erebia epiphron		Peter Sonderegger	petersonderegger@bluewin.ch
GBIFCH-BOL_LEPAA_0445	Arthropoda	Insecta	Lepidoptera	Nymphalidae	Satyrinae		Aphantopus	Aphantopus hyperantus		Peter Sonderegger	petersonderegger@bluewin.ch
GBIFCH-BOL_LEPAA_0446	Arthropoda	Insecta	Lepidoptera	Nymphalidae	Heliconiinae		Boloria	Boloria euphrosyne		Peter Sonderegger	petersonderegger@bluewin.ch
GBIFCH-BOL_LEPAA_0447	Arthropoda	Insecta	Lepidoptera	Nymphalidae	Satyrinae		Erebia	Erebia pronoe	Erebia pronoe vergy	Peter Sonderegger	petersonderegger@bluewin.ch
GBIFCH-BOL_LEPAA_0448	Arthropoda	Insecta	Lepidoptera	Hesperiidae	Pyrginae		Pyrgus	Pyrgus andromedae		Peter Sonderegger	petersonderegger@bluewin.ch
GBIFCH-BOL_LEPAA_0449	Arthropoda	Insecta	Lepidoptera	Nymphalidae	Nymphalinae		Melitaea	Melitaea varia		Peter Sonderegger	petersonderegger@bluewin.ch
GBIFCH-BOL_LEPAA_0450	Arthropoda	Insecta	Lepidoptera	Nymphalidae	Nymphalinae		Euphydryas	Euphydryas aurinia	Euphydryas aurinia glaciegenita	Peter Sonderegger	petersonderegger@bluewin.ch
GBIFCH-BOL_LEPAA_0451	Arthropoda	Insecta	Lepidoptera	Nymphalidae	Heliconiinae		Fabriciana	Fabriciana niobe		Peter Sonderegger	petersonderegger@bluewin.ch
GBIFCH-BOL_LEPAA_0452	Arthropoda	Insecta	Lepidoptera	Pieridae	Pierinae		Pieris	Pieris mannii		Peter Sonderegger	petersonderegger@bluewin.ch
GBIFCH-BOL_LEPAA_0453	Arthropoda	Insecta	Lepidoptera	Zygaenidae	Zygaeninae		Zygaena	Zygaena exulans		Peter Sonderegger	petersonderegger@bluewin.ch
GBIFCH-BOL_LEPAA_0454	Arthropoda	Insecta	Lepidoptera	Lycaenidae	Polyommatinae		Aricia	Aricia artaxerxes		Peter Sonderegger	petersonderegger@bluewin.ch
GBIFCH-BOL_LEPAA_0455	Arthropoda	Insecta	Lepidoptera	Lycaenidae	Polyommatinae		Plebejus	Plebejus idas		Peter Sonderegger	petersonderegger@bluewin.ch	identified by morphological criteria
GBIFCH-BOL_LEPAA_0456	Arthropoda	Insecta	Lepidoptera	Hesperiidae	Hesperiinae		Ochlodes	Ochlodes sylvanus		Peter Sonderegger	petersonderegger@bluewin.ch
GBIFCH-BOL_LEPAA_0457	Arthropoda	Insecta	Lepidoptera	Hesperiidae	Hesperiinae		Thymelicus	Thymelicus lineola		Peter Sonderegger	petersonderegger@bluewin.ch
GBIFCH-BOL_LEPAA_0458	Arthropoda	Insecta	Lepidoptera	Hesperiidae	Hesperiinae		Hesperia	Hesperia comma		Peter Sonderegger	petersonderegger@bluewin.ch
GBIFCH-BOL_LEPAA_0459	Arthropoda	Insecta	Lepidoptera	Hesperiidae	Pyrginae		Pyrgus	Pyrgus armoricanus		Peter Sonderegger	petersonderegger@bluewin.ch	identified by genitalia, anatomically
GBIFCH-BOL_LEPAA_0460	Arthropoda	Insecta	Lepidoptera	Hesperiidae	Pyrginae		Pyrgus	Pyrgus cacaliae		Peter Sonderegger	petersonderegger@bluewin.ch	identified by genitalia, anatomically
GBIFCH-BOL_LEPAA_0461	Arthropoda	Insecta	Lepidoptera	Zygaenidae	Zygaeninae		Zygaena	Zygaena filipendulae		Raymond Guenin
GBIFCH-BOL_LEPAA_0462	Arthropoda	Insecta	Lepidoptera	Zygaenidae	Zygaeninae		Zygaena	Zygaena purpuralis		Markus Fluri
GBIFCH-BOL_LEPAA_0463	Arthropoda	Insecta	Lepidoptera	Lycaenidae	Polyommatinae		Plebejus	Plebejus argus		Markus Fluri
GBIFCH-BOL_LEPAA_0464	Arthropoda	Insecta	Lepidoptera	Lycaenidae	Polyommatinae		Phengaris	Phengaris arion		Peter Sonderegger	petersonderegger@bluewin.ch
GBIFCH-BOL_LEPAA_0465	Arthropoda	Insecta	Lepidoptera	Papilionidae	Parnassiinae		Parnassius	Parnassius sacerdos		Peter Sonderegger	petersonderegger@bluewin.ch
GBIFCH-BOL_LEPAA_0466	Arthropoda	Insecta	Lepidoptera	Papilionidae	Papilioninae		Papilio	Papilio machaon		Peter Sonderegger	petersonderegger@bluewin.ch
GBIFCH-BOL_LEPAA_0467	Arthropoda	Insecta	Lepidoptera	Nymphalidae	Nymphalinae		Vanessa	Vanessa atalanta		Peter Sonderegger	petersonderegger@bluewin.ch
GBIFCH-BOL_LEPAA_0468	Arthropoda	Insecta	Lepidoptera	Nymphalidae	Nymphalinae		Vanessa	Vanessa cardui		Peter Sonderegger	petersonderegger@bluewin.ch
GBIFCH-BOL_LEPAA_0469	Arthropoda	Insecta	Lepidoptera	Nymphalidae	Nymphalinae		Aglais	Aglais urticae		Peter Sonderegger	petersonderegger@bluewin.ch
GBIFCH-BOL_LEPAA_0470	Arthropoda	Insecta	Lepidoptera	Pieridae	Pierinae		Aporia	Aporia crataegi		Peter Sonderegger	petersonderegger@bluewin.ch
GBIFCH-BOL_LEPAA_0471	Arthropoda	Insecta	Lepidoptera	Pieridae	Pierinae		Pieris	Pieris rapae		Peter Sonderegger	petersonderegger@bluewin.ch
GBIFCH-BOL_LEPAA_0472	Arthropoda	Insecta	Lepidoptera	Pieridae	Pierinae		Pieris	Pieris bryoniae		Peter Sonderegger	petersonderegger@bluewin.ch
GBIFCH-BOL_LEPAA_0473	Arthropoda	Insecta	Lepidoptera	Pieridae	Pierinae		Pontia	Pontia callidice		Peter Sonderegger	petersonderegger@bluewin.ch
GBIFCH-BOL_LEPAA_0474	Arthropoda	Insecta	Lepidoptera	Pieridae	Coliadinae		Colias	Colias croceus		Peter Sonderegger	petersonderegger@bluewin.ch
GBIFCH-BOL_LEPAA_0475	Arthropoda	Insecta	Lepidoptera	Pieridae	Coliadinae		Colias	Colias phicomone		Peter Sonderegger	petersonderegger@bluewin.ch
GBIFCH-BOL_LEPAA_0476	Arthropoda	Insecta	Lepidoptera	Pieridae	Coliadinae		Colias	Colias sp.		Peter Sonderegger	petersonderegger@bluewin.ch		Colias hyale/alfacariensis
GBIFCH-BOL_LEPAA_0477	Arthropoda	Insecta	Lepidoptera	Pieridae	Coliadinae		Gonepteryx	Gonepteryx rhamni		Peter Sonderegger	petersonderegger@bluewin.ch
GBIFCH-BOL_LEPAA_0478	Arthropoda	Insecta	Lepidoptera	Nymphalidae	Heliconiinae		Fabriciana	Fabriciana adippe		Peter Sonderegger	petersonderegger@bluewin.ch
GBIFCH-BOL_LEPAA_0479	Arthropoda	Insecta	Lepidoptera	Nymphalidae	Heliconiinae		Speyeria	Speyeria agalaja		Peter Sonderegger	petersonderegger@bluewin.ch
GBIFCH-BOL_LEPAA_0480	Arthropoda	Insecta	Lepidoptera	Nymphalidae	Heliconiinae		Issoria	Issoria lathonia		Peter Sonderegger	petersonderegger@bluewin.ch
GBIFCH-BOL_LEPAA_0481	Arthropoda	Insecta	Lepidoptera	Nymphalidae	Heliconiinae		Boloria	Boloria titania		Peter Sonderegger	petersonderegger@bluewin.ch
GBIFCH-BOL_LEPAA_0482	Arthropoda	Insecta	Lepidoptera	Nymphalidae	Heliconiinae		Boloria	Boloria pales		Peter Sonderegger	petersonderegger@bluewin.ch
GBIFCH-BOL_LEPAA_0483	Arthropoda	Insecta	Lepidoptera	Nymphalidae	Heliconiinae		Boloria	Boloria napaea		Peter Sonderegger	petersonderegger@bluewin.ch
GBIFCH-BOL_LEPAA_0484	Arthropoda	Insecta	Lepidoptera	Nymphalidae	Heliconiinae		Boloria	Boloria selene		Peter Sonderegger	petersonderegger@bluewin.ch
GBIFCH-BOL_LEPAA_0485	Arthropoda	Insecta	Lepidoptera	Nymphalidae	Heliconiinae		Boloria	Boloria dia		Peter Sonderegger	petersonderegger@bluewin.ch
GBIFCH-BOL_LEPAA_0486	Arthropoda	Insecta	Lepidoptera	Nymphalidae	Nymphalinae		Euphydryas	Euphydryas cynthia		Peter Sonderegger	petersonderegger@bluewin.ch
GBIFCH-BOL_LEPAA_0487	Arthropoda	Insecta	Lepidoptera	Nymphalidae	Nymphalinae		Melitaea	Melitaea diamina		Peter Sonderegger	petersonderegger@bluewin.ch
GBIFCH-BOL_LEPAA_0488	Arthropoda	Insecta	Lepidoptera	Nymphalidae	Nymphalinae		Melitaea	Melitaea phoebe		Peter Sonderegger	petersonderegger@bluewin.ch
GBIFCH-BOL_LEPAA_0489	Arthropoda	Insecta	Lepidoptera	Nymphalidae	Satyrinae		Melanargia	Melanargia galathea		Peter Sonderegger	petersonderegger@bluewin.ch
GBIFCH-BOL_LEPAA_0490	Arthropoda	Insecta	Lepidoptera	Nymphalidae	Satyrinae		Lasiommata	Lasiommata petropolitana		Peter Sonderegger	petersonderegger@bluewin.ch
GBIFCH-BOL_LEPAA_0491	Arthropoda	Insecta	Lepidoptera	Nymphalidae	Satyrinae		Lasiommata	Lasiommata maera
GBIFCH-BOL_LEPAA_0492	Arthropoda	Insecta	Lepidoptera	Nymphalidae	Satyrinae		Lasiommata	Lasiommata megera		Peter Sonderegger	petersonderegger@bluewin.ch
GBIFCH-BOL_LEPAA_0493	Arthropoda	Insecta	Lepidoptera	Nymphalidae	Satyrinae		Erebia	Erebia medusa		Peter Sonderegger	petersonderegger@bluewin.ch
GBIFCH-BOL_LEPAA_0494	Arthropoda	Insecta	Lepidoptera	Nymphalidae	Satyrinae		Erebia	Erebia pluto		Peter Sonderegger	petersonderegger@bluewin.ch
GBIFCH-BOL_LEPAA_0495	Arthropoda	Insecta	Lepidoptera	Nymphalidae	Satyrinae		Erebia	Erebia euryale		Peter Sonderegger	petersonderegger@bluewin.ch
GBIFCH-BOL_LEPAA_0496	Arthropoda	Insecta	Lepidoptera	Nymphalidae	Satyrinae		Erebia	Erebia pandrose		Peter Sonderegger	petersonderegger@bluewin.ch
GBIFCH-BOL_LEPAA_0497	Arthropoda	Insecta	Lepidoptera	Nymphalidae	Satyrinae		Erebia	Erebia ligea		Peter Sonderegger	petersonderegger@bluewin.ch
GBIFCH-BOL_LEPAA_0498	Arthropoda	Insecta	Lepidoptera	Nymphalidae	Satyrinae		Erebia	Erebia aethiops		Peter Sonderegger	petersonderegger@bluewin.ch
GBIFCH-BOL_LEPAA_0499	Arthropoda	Insecta	Lepidoptera	Nymphalidae	Satyrinae		Erebia	Erebia gorge		Peter Sonderegger	petersonderegger@bluewin.ch
GBIFCH-BOL_LEPAA_0500	Arthropoda	Insecta	Lepidoptera	Nymphalidae	Satyrinae		Erebia	Erebia meolans		Peter Sonderegger	petersonderegger@bluewin.ch
GBIFCH-BOL_LEPAA_0501	Arthropoda	Insecta	Lepidoptera	Nymphalidae	Satyrinae		Erebia	Erebia montana		Peter Sonderegger	petersonderegger@bluewin.ch
GBIFCH-BOL_LEPAA_0502	Arthropoda	Insecta	Lepidoptera	Nymphalidae	Satyrinae		Erebia	Erebia manto		Peter Sonderegger	petersonderegger@bluewin.ch	identified by genitalia, anatomically
GBIFCH-BOL_LEPAA_0503	Arthropoda	Insecta	Lepidoptera	Nymphalidae	Satyrinae		Erebia	Erebia oeme		Peter Sonderegger	petersonderegger@bluewin.ch
GBIFCH-BOL_LEPAA_0504	Arthropoda	Insecta	Lepidoptera	Nymphalidae	Satyrinae		Erebia	Erebia pharte		Peter Sonderegger	petersonderegger@bluewin.ch
GBIFCH-BOL_LEPAA_0505	Arthropoda	Insecta	Lepidoptera	Nymphalidae	Satyrinae		Erebia	Erebia tyndarus		Peter Sonderegger	petersonderegger@bluewin.ch
GBIFCH-BOL_LEPAA_0506	Arthropoda	Insecta	Lepidoptera	Nymphalidae	Satyrinae		Erebia	Erebia melampus		Peter Sonderegger	petersonderegger@bluewin.ch
GBIFCH-BOL_LEPAA_0507	Arthropoda	Insecta	Lepidoptera	Nymphalidae	Satyrinae		Coenonympha	Coenonympha gardetta		Peter Sonderegger	petersonderegger@bluewin.ch
GBIFCH-BOL_LEPAA_0508	Arthropoda	Insecta	Lepidoptera	Lycaenidae	Lycaeninae		Lycaena	Lycaena hippothoe	Lycaena hippothoe eurydame	Peter Sonderegger	petersonderegger@bluewin.ch
GBIFCH-BOL_LEPAA_0509	Arthropoda	Insecta	Lepidoptera	Lycaenidae	Theclinae		Callophrys	Callophrys rubi		Peter Sonderegger	petersonderegger@bluewin.ch
GBIFCH-BOL_LEPAA_0510	Arthropoda	Insecta	Lepidoptera	Lycaenidae	Polyommatinae		Polyommatus	Polyommatus dorylas		Peter Sonderegger	petersonderegger@bluewin.ch
GBIFCH-BOL_LEPAA_0511	Arthropoda	Insecta	Lepidoptera	Lycaenidae	Polyommatinae		Cyaniris	Cyaniris semiargus		Peter Sonderegger	petersonderegger@bluewin.ch
GBIFCH-BOL_LEPAA_0512	Arthropoda	Insecta	Lepidoptera	Lycaenidae	Polyommatinae		Phengaris	Phengaris alcon		Peter Sonderegger	petersonderegger@bluewin.ch		ecotype dryland
GBIFCH-BOL_LEPAA_0513	Arthropoda	Insecta	Lepidoptera	Lycaenidae	Lycaeninae		Lycaena	Lycaena tityrus	Lycaena tityrus subalpina	Peter Sonderegger	petersonderegger@bluewin.ch
GBIFCH-BOL_LEPAA_0514	Arthropoda	Insecta	Lepidoptera	Lycaenidae	Polyommatinae		Lysandra	Lysandra coridon		Peter Sonderegger	petersonderegger@bluewin.ch
GBIFCH-BOL_LEPAA_0515	Arthropoda	Insecta	Lepidoptera	Lycaenidae	Lycaeninae		Lycaena	Lycaena virgaureae		Peter Sonderegger	petersonderegger@bluewin.ch
GBIFCH-BOL_LEPAA_0516	Arthropoda	Insecta	Lepidoptera	Lycaenidae	Polyommatinae		Lysandra	Lysandra bellargus		Peter Sonderegger	petersonderegger@bluewin.ch
GBIFCH-BOL_LEPAA_0517	Arthropoda	Insecta	Lepidoptera	Lycaenidae	Polyommatinae		Polyommatus	Polyommatus icarus
GBIFCH-BOL_LEPAA_0518	Arthropoda	Insecta	Lepidoptera	Lycaenidae	Polyommatinae		Eumedonia	Eumedonia eumedon		Peter Sonderegger	petersonderegger@bluewin.ch
GBIFCH-BOL_LEPAA_0519	Arthropoda	Insecta	Lepidoptera	Lycaenidae	Polyommatinae		Agriades	Agriades orbitulus		Peter Sonderegger	petersonderegger@bluewin.ch
GBIFCH-BOL_LEPAA_0520	Arthropoda	Insecta	Lepidoptera	Lycaenidae	Polyommatinae		Polyommatus	Polyommatus eros		Peter Sonderegger	petersonderegger@bluewin.ch
GBIFCH-BOL_LEPAA_0521	Arthropoda	Insecta	Lepidoptera	Lycaenidae	Polyommatinae		Cupido	Cupido minimus		Peter Sonderegger	petersonderegger@bluewin.ch
GBIFCH-BOL_LEPAA_0522	Arthropoda	Insecta	Lepidoptera	Hesperiidae	Heteropterinae		Carterocephalus	Carterocephalus palaemon		Peter Sonderegger	petersonderegger@bluewin.ch
GBIFCH-BOL_LEPAA_0523	Arthropoda	Insecta	Lepidoptera	Hesperiidae	Pyrginae		Erynnis	Erynnis tages		Peter Sonderegger	petersonderegger@bluewin.ch
GBIFCH-BOL_LEPAA_0524	Arthropoda	Insecta	Lepidoptera	Hesperiidae	Hesperiinae		Hesperia	Hesperia comma		Peter Sonderegger	petersonderegger@bluewin.ch
GBIFCH-BOL_LEPAA_0525	Arthropoda	Insecta	Lepidoptera	Zygaenidae	Zygaeninae		Zygaena	Zygaena filipendulae		Raymond Guenin
GBIFCH-BOL_LEPAA_0526	Arthropoda	Insecta	Lepidoptera	Zygaenidae	Zygaeninae		Zygaena	Zygaena loti		Raymond Guenin
GBIFCH-BOL_LEPAA_0527	Arthropoda	Insecta	Lepidoptera	Nymphalidae	Heliconiinae		Boloria	Boloria thore		Peter Sonderegger	petersonderegger@bluewin.ch
GBIFCH-BOL_LEPAA_0528	Arthropoda	Insecta	Lepidoptera	Nymphalidae	Nymphalinae		Melitaea	Melitaea varia		Peter Sonderegger	petersonderegger@bluewin.ch	identified by genitalia, anatomically
GBIFCH-BOL_LEPAA_0529	Arthropoda	Insecta	Lepidoptera	Nymphalidae	Satyrinae		Coenonympha	Coenonympha gardetta		Peter Sonderegger	petersonderegger@bluewin.ch
GBIFCH-BOL_LEPAA_0530	Arthropoda	Insecta	Lepidoptera	Lycaenidae	Polyommatinae		Plebejus	Plebejus argus		Peter Sonderegger	petersonderegger@bluewin.ch	identified by morphological criteria
GBIFCH-BOL_LEPAA_0531	Arthropoda	Insecta	Lepidoptera	Hesperiidae	Pyrginae		Pyrgus	Pyrgus cacaliae		Peter Sonderegger	petersonderegger@bluewin.ch
GBIFCH-BOL_LEPAA_0532	Arthropoda	Insecta	Lepidoptera	Lycaenidae	Lycaeninae		Lycaena	Lycaena virgaureae		Peter Sonderegger	petersonderegger@bluewin.ch
GBIFCH-BOL_LEPAA_0533	Arthropoda	Insecta	Lepidoptera	Hesperiidae	Pyrginae		Pyrgus	Pyrgus malvoides		Peter Sonderegger	petersonderegger@bluewin.ch	identified by genitalia, anatomically
GBIFCH-BOL_LEPAA_0534	Arthropoda	Insecta	Lepidoptera	Zygaenidae	Zygaeninae		Zygaena	Zygaena lonicerae		Raymond Guenin
GBIFCH-BOL_LEPAA_0535	Arthropoda	Insecta	Lepidoptera	Pieridae	Coliadinae		Colias	Colias alfacariensis		Peter Sonderegger	petersonderegger@bluewin.ch
GBIFCH-BOL_LEPAA_0536	Arthropoda	Insecta	Lepidoptera	Lycaenidae	Polyommatinae		Agriades	Agriades glandon		Peter Sonderegger	petersonderegger@bluewin.ch
GBIFCH-BOL_LEPAA_0537	Arthropoda	Insecta	Lepidoptera	Lycaenidae	Polyommatinae		Agriades	Agriades optilete		Peter Sonderegger	petersonderegger@bluewin.ch
GBIFCH-BOL_LEPAA_0538	Arthropoda	Insecta	Lepidoptera	Hesperiidae	Pyrginae		Pyrgus	Pyrgus malvoides		Peter Sonderegger	petersonderegger@bluewin.ch	identified by genitalia, anatomically
GBIFCH-BOL_LEPAA_0539	Arthropoda	Insecta	Lepidoptera	Nymphalidae	Heliconiinae		Fabriciana	Fabriciana niobe		Peter Sonderegger	petersonderegger@bluewin.ch
GBIFCH-BOL_LEPAA_0540	Arthropoda	Insecta	Lepidoptera	Nymphalidae	Nymphalinae		Melitaea	Melitaea nevadensis		Yannick Chittaro		identified by genitalia, anatomically
GBIFCH-BOL_LEPAA_0541	Arthropoda	Insecta	Lepidoptera	Nymphalidae	Nymphalinae		Melitaea	Melitaea diamina		Peter Sonderegger	petersonderegger@bluewin.ch
GBIFCH-BOL_LEPAA_0542	Arthropoda	Insecta	Lepidoptera	Nymphalidae	Nymphalinae		Melitaea	Melitaea parthenoides		Peter Sonderegger	petersonderegger@bluewin.ch	identified by genitalia, anatomically
GBIFCH-BOL_LEPAA_0543	Arthropoda	Insecta	Lepidoptera	Lycaenidae	Lycaeninae		Lycaena	Lycaena hippothoe	Lycaena hippothoe eurydice	Peter Sonderegger	petersonderegger@bluewin.ch
GBIFCH-BOL_LEPAA_0544	Arthropoda	Insecta	Lepidoptera	Hesperiidae	Hesperiinae		Thymelicus	Thymelicus lineola		Peter Sonderegger	petersonderegger@bluewin.ch
GBIFCH-BOL_LEPAA_0545	Arthropoda	Insecta	Lepidoptera	Hesperiidae	Hesperiinae		Thymelicus	Thymelicus lineola		Peter Sonderegger	petersonderegger@bluewin.ch
GBIFCH-BOL_LEPAA_0546	Arthropoda	Insecta	Lepidoptera	Hesperiidae	Pyrginae		Erynnis	Erynnis tages		Peter Sonderegger	petersonderegger@bluewin.ch
GBIFCH-BOL_LEPAA_0547	Arthropoda	Insecta	Lepidoptera	Hesperiidae	Pyrginae		Spialia	Spialia sertorius		Peter Sonderegger	petersonderegger@bluewin.ch
GBIFCH-BOL_LEPAA_0548	Arthropoda	Insecta	Lepidoptera	Zygaenidae	Zygaeninae		Zygaena	Zygaena ephialtes		Raymond Guenin
GBIFCH-BOL_LEPAA_0549	Arthropoda	Insecta	Lepidoptera	Zygaenidae	Zygaeninae		Zygaena	Zygaena filipendulae		Raymond Guenin
GBIFCH-BOL_LEPAA_0550	Arthropoda	Insecta	Lepidoptera	Zygaenidae	Zygaeninae		Zygaena	Zygaena filipendulae		Raymond Guenin
GBIFCH-BOL_LEPAA_0551	Arthropoda	Insecta	Lepidoptera	Nymphalidae	Heliconiinae		Boloria	Boloria napaea		Peter Sonderegger	petersonderegger@bluewin.ch
GBIFCH-BOL_LEPAA_0552	Arthropoda	Insecta	Lepidoptera	Nymphalidae	Satyrinae		Erebia	Erebia pluto		Peter Sonderegger	petersonderegger@bluewin.ch
GBIFCH-BOL_LEPAA_0553	Arthropoda	Insecta	Lepidoptera	Nymphalidae	Satyrinae		Lasiommata	Lasiommata petropolitana				captured, identified in hand
GBIFCH-BOL_LEPAA_0554	Arthropoda	Insecta	Lepidoptera	Nymphalidae	Satyrinae		Erebia	Erebia tyndarus		Yannick Chittaro
GBIFCH-BOL_LEPAA_0555	Arthropoda	Insecta	Lepidoptera	Nymphalidae	Satyrinae		Aphantopus	Aphantopus hyperantus		Peter Sonderegger	petersonderegger@bluewin.ch
GBIFCH-BOL_LEPAA_0556	Arthropoda	Insecta	Lepidoptera	Pieridae	Coliadinae		Colias	Colias hyale		Peter Sonderegger	petersonderegger@bluewin.ch
GBIFCH-BOL_LEPAA_0557	Arthropoda	Insecta	Lepidoptera	Nymphalidae	Libytheinae		Libythea	Libythea celtis		Peter Sonderegger	petersonderegger@bluewin.ch
GBIFCH-BOL_LEPAA_0558	Arthropoda	Insecta	Lepidoptera	Pieridae	Dismorphiinae		Leptidea	Leptidea juvernica		Peter Sonderegger	petersonderegger@bluewin.ch	identified by genitalia, anatomically
GBIFCH-BOL_LEPAA_0559	Arthropoda	Insecta	Lepidoptera	Lycaenidae	Theclinae		Thecla	Thecla betulae		Peter Sonderegger	petersonderegger@bluewin.ch
GBIFCH-BOL_LEPAA_0560	Arthropoda	Insecta	Lepidoptera	Lycaenidae	Polyommatinae		Lysandra	Lysandra coridon		Peter Sonderegger	petersonderegger@bluewin.ch
GBIFCH-BOL_LEPAA_0561	Arthropoda	Insecta	Lepidoptera	Lycaenidae	Polyommatinae		Phengaris	Phengaris arion		Peter Sonderegger	petersonderegger@bluewin.ch
GBIFCH-BOL_LEPAA_0562	Arthropoda	Insecta	Lepidoptera	Zygaenidae	Zygaeninae		Zygaena	Zygaena viciae		Raymond Guenin
GBIFCH-BOL_LEPAA_0563	Arthropoda	Insecta	Lepidoptera	Lycaenidae	Polyommatinae		Glaucopsyche	Glaucopsyche alexis		Peter Sonderegger	petersonderegger@bluewin.ch
GBIFCH-BOL_LEPAA_0564	Arthropoda	Insecta	Lepidoptera	Lycaenidae	Lycaeninae		Lycaena	Lycaena virgaureae		Peter Sonderegger	petersonderegger@bluewin.ch
GBIFCH-BOL_LEPAA_0565	Arthropoda	Insecta	Lepidoptera	Hesperiidae	Pyrginae		Pyrgus	Pyrgus armoricanus		Emmanuel Wermeille
GBIFCH-BOL_LEPAA_0566	Arthropoda	Insecta	Lepidoptera	Lycaenidae	Polyommatinae		Phengaris	Phengaris teleius		Emmanuel Wermeille
GBIFCH-BOL_LEPAA_0567	Arthropoda	Insecta	Lepidoptera	Hesperiidae	Pyrginae		Pyrgus	Pyrgus malvae		Emmanuel Wermeille
GBIFCH-BOL_LEPAA_0568	Arthropoda	Insecta	Lepidoptera	Hesperiidae	Pyrginae		Pyrgus	Pyrgus armoricanus		Emmanuel Wermeille
GBIFCH-BOL_LEPAA_0569	Arthropoda	Insecta	Lepidoptera	Lycaenidae	Theclinae		Satyrium	Satyrium ilicis		Emmanuel Wermeille
GBIFCH-BOL_LEPAA_0570	Arthropoda	Insecta	Lepidoptera	Lycaenidae	Theclinae		Satyrium	Satyrium acaciae		Emmanuel Wermeille
GBIFCH-BOL_LEPAA_0571	Arthropoda	Insecta	Lepidoptera	Lycaenidae	Polyommatinae		Plebejus	Plebejus argus		Emmanuel Wermeille
GBIFCH-BOL_LEPAA_0572	Arthropoda	Insecta	Lepidoptera	Pieridae	Pierinae		Pieris	Pieris napi		Emmanuel Wermeille
GBIFCH-BOL_LEPAA_0573	Arthropoda	Insecta	Lepidoptera	Nymphalidae	Nymphalinae		Melitaea	Melitaea parthenoides		Emmanuel Wermeille
GBIFCH-BOL_LEPAA_0574	Arthropoda	Insecta	Lepidoptera	Lycaenidae	Polyommatinae		Plebejus	Plebejus argus		Yannick Chittaro		identified by genitalia, anatomically
GBIFCH-BOL_LEPAA_0575	Arthropoda	Insecta	Lepidoptera	Hesperiidae	Hesperiinae		Thymelicus	Thymelicus acteon		Emmanuel Wermeille
GBIFCH-BOL_LEPAA_0576	Arthropoda	Insecta	Lepidoptera	Lycaenidae	Polyommatinae		Cupido	Cupido minimus		Emmanuel Wermeille
GBIFCH-BOL_LEPAA_0577	Arthropoda	Insecta	Lepidoptera	Pieridae	Coliadinae		Colias	Colias hyale		Emmanuel Wermeille
GBIFCH-BOL_LEPAA_0578	Arthropoda	Insecta	Lepidoptera	Pieridae	Coliadinae		Colias	Colias croceus		Emmanuel Wermeille
GBIFCH-BOL_LEPAA_0579	Arthropoda	Insecta	Lepidoptera	Nymphalidae	Satyrinae		Coenonympha	Coenonympha glycerion		Emmanuel Wermeille
GBIFCH-BOL_LEPAA_0580	Arthropoda	Insecta	Lepidoptera	Lycaenidae	Polyommatinae		Aricia	Aricia artaxerxes		Emmanuel Wermeille
GBIFCH-BOL_LEPAA_0581	Arthropoda	Insecta	Lepidoptera	Lycaenidae	Polyommatinae		Aricia	Aricia agestis		Emmanuel Wermeille
GBIFCH-BOL_LEPAA_0582	Arthropoda	Insecta	Lepidoptera	Lycaenidae	Polyommatinae		Aricia	Aricia artaxerxes		Emmanuel Wermeille
GBIFCH-BOL_LEPAA_0583	Arthropoda	Insecta	Lepidoptera	Lycaenidae	Polyommatinae		Aricia	Aricia agestis		Emmanuel Wermeille
GBIFCH-BOL_LEPAA_0584	Arthropoda	Insecta	Lepidoptera	Lycaenidae	Polyommatinae		Aricia	Aricia agestis		Emmanuel Wermeille
GBIFCH-BOL_LEPAA_0585	Arthropoda	Insecta	Lepidoptera	Lycaenidae	Polyommatinae		Aricia	Aricia artaxerxes		Emmanuel Wermeille
GBIFCH-BOL_LEPAA_0586	Arthropoda	Insecta	Lepidoptera	Zygaenidae	Procridinae		Adscita	Adscita geryon		Raymond Guenin		identified by genitalia, anatomically
GBIFCH-BOL_LEPAA_0587	Arthropoda	Insecta	Lepidoptera	Zygaenidae	Procridinae		Adscita	Adscita alpina		Raymond Guenin		identified by genitalia, anatomically
GBIFCH-BOL_LEPAA_0588	Arthropoda	Insecta	Lepidoptera	Zygaenidae	Procridinae		Adscita	Adscita alpina		Raymond Guenin		identified by genitalia, anatomically
GBIFCH-BOL_LEPAA_0589	Arthropoda	Insecta	Lepidoptera	Zygaenidae	Procridinae		Adscita	Adscita statices		Raymond Guenin		identified by genitalia, anatomically
GBIFCH-BOL_LEPAA_0590	Arthropoda	Insecta	Lepidoptera	Zygaenidae	Procridinae		Adscita	Adscita geryon		Raymond Guenin		identified by genitalia, anatomically
GBIFCH-BOL_LEPAA_0591	Arthropoda	Insecta	Lepidoptera	Zygaenidae	Procridinae		Adscita	Adscita statices		Raymond Guenin		identified by genitalia, anatomically
GBIFCH-BOL_LEPAA_0592	Arthropoda	Insecta	Lepidoptera	Zygaenidae	Procridinae		Jordanita	Jordanita globulariae		Raymond Guenin		identified by genitalia, anatomically
GBIFCH-BOL_LEPAA_0593	Arthropoda	Insecta	Lepidoptera	Zygaenidae	Zygaeninae		Zygaena	Zygaena trifolii		Raymond Guenin		identified by genitalia, anatomically
GBIFCH-BOL_LEPAA_0594	Arthropoda	Insecta	Lepidoptera	Zygaenidae	Zygaeninae		Zygaena	Zygaena purpuralis		Raymond Guenin		identified by genitalia, anatomically
GBIFCH-BOL_LEPAA_0595	Arthropoda	Insecta	Lepidoptera	Zygaenidae	Zygaeninae		Zygaena	Zygaena purpuralis		Raymond Guenin		identified by genitalia, anatomically
GBIFCH-BOL_LEPAA_0596	Arthropoda	Insecta	Lepidoptera	Zygaenidae	Zygaeninae		Zygaena	Zygaena lonicerae		Raymond Guenin		identified by genitalia, anatomically
GBIFCH-BOL_LEPAA_0597	Arthropoda	Insecta	Lepidoptera	Zygaenidae	Zygaeninae		Zygaena	Zygaena lonicerae		Raymond Guenin		identified by genitalia, anatomically
GBIFCH-BOL_LEPAA_0598	Arthropoda	Insecta	Lepidoptera	Zygaenidae	Procridinae		Adscita	Adscita alpina		Raymond Guenin		identified by genitalia, anatomically
GBIFCH-BOL_LEPAA_0599	Arthropoda	Insecta	Lepidoptera	Nymphalidae	Satyrinae		Chazara	Chazara briseis		Yannick Chittaro
GBIFCH-BOL_LEPAA_0600	Arthropoda	Insecta	Lepidoptera	Zygaenidae	Procridinae		Adscita	Adscita dujardini		Raymond Guenin		identified by genitalia, anatomically
GBIFCH-BOL_LEPAA_0601	Arthropoda	Insecta	Lepidoptera	Zygaenidae	Procridinae		Adscita	Adscita mannii		Raymond Guenin
GBIFCH-BOL_LEPAA_0602	Arthropoda	Insecta	Lepidoptera	Zygaenidae	Procridinae		Jordanita	Jordanita globulariae		Raymond Guenin		identified by genitalia, anatomically
GBIFCH-BOL_LEPAA_0603	Arthropoda	Insecta	Lepidoptera	Zygaenidae	Procridinae		Jordanita	Jordanita notata		Raymond Guenin
GBIFCH-BOL_LEPAA_0604	Arthropoda	Insecta	Lepidoptera	Zygaenidae	Procridinae		Jordanita	Jordanita subsolana		Raymond Guenin		identified by genitalia, anatomically
GBIFCH-BOL_LEPAA_0605	Arthropoda	Insecta	Lepidoptera	Zygaenidae	Zygaeninae		Zygaena	Zygaena minos		Raymond Guenin		captured, identified in hand
GBIFCH-BOL_LEPAA_0606	Arthropoda	Insecta	Lepidoptera	Lycaenidae	Polyommatinae		Aricia	Aricia nicias		Florian Altermatt
GBIFCH-BOL_LEPAA_0607	Arthropoda	Insecta	Lepidoptera	Nymphalidae	Satyrinae		Coenonympha	Coenonympha tullia		Yannick Chittaro
GBIFCH-BOL_LEPAA_0608	Arthropoda	Insecta	Lepidoptera	Nymphalidae	Satyrinae		Erebia	Erebia styx		Yannick Chittaro
GBIFCH-BOL_LEPAA_0609	Arthropoda	Insecta	Lepidoptera	Hesperiidae	Heteropterinae		Heteropterus	Heteropterus morpheus		Yannick Chittaro
GBIFCH-BOL_LEPAA_0610	Arthropoda	Insecta	Lepidoptera	Nymphalidae	Nymphalinae		Melitaea	Melitaea britomartis		Yannick Chittaro		identified by genitalia, anatomically
GBIFCH-BOL_LEPAA_0611	Arthropoda	Insecta	Lepidoptera	Lycaenidae	Polyommatinae		Scolitantides	Scolitantides orion
GBIFCH-BOL_LEPAA_0613	Arthropoda	Insecta	Lepidoptera	Nymphalidae	Nymphalinae		Aglais	Aglais urticae		Paolo Palmi
GBIFCH-BOL_LEPAA_0614	Arthropoda	Insecta	Lepidoptera	Nymphalidae	Satyrinae		Lasiommata	Lasiommata petropolitana		Yannick Chittaro
GBIFCH-BOL_LEPAA_0615	Arthropoda	Insecta	Lepidoptera	Zygaenidae	Zygaeninae		Zygaena	Zygaena viciae		Markus Fluri
GBIFCH-BOL_LEPAA_0616	Arthropoda	Insecta	Lepidoptera	Lycaenidae	Polyommatinae		Plebejus	Plebejus idas		Markus Fluri
GBIFCH-BOL_LEPAA_0617	Arthropoda	Insecta	Lepidoptera	Zygaenidae	Procridinae		Adscita	Adscita statices		Markus Fluri
GBIFCH-BOL_LEPAA_0618	Arthropoda	Insecta	Lepidoptera	Nymphalidae	Heliconiinae		Fabriciana	Fabriciana adippe		Paolo Palmi
GBIFCH-BOL_LEPAA_0619	Arthropoda	Insecta	Lepidoptera	Nymphalidae	Heliconiinae		Fabriciana	Fabriciana adippe		Peter Sonderegger	petersonderegger@bluewin.ch
GBIFCH-BOL_LEPAA_0620	Arthropoda	Insecta	Lepidoptera	Nymphalidae	Heliconiinae		Boloria	Boloria euphrosyne		Peter Sonderegger	petersonderegger@bluewin.ch
GBIFCH-BOL_LEPAA_0621	Arthropoda	Insecta	Lepidoptera	Pieridae	Coliadinae		Colias	Colias phicomone		Peter Sonderegger	petersonderegger@bluewin.ch
GBIFCH-BOL_LEPAA_0622	Arthropoda	Insecta	Lepidoptera	Lycaenidae	Polyommatinae		Cupido	Cupido minimus		Peter Sonderegger	petersonderegger@bluewin.ch
GBIFCH-BOL_LEPAA_0623	Arthropoda	Insecta	Lepidoptera	Nymphalidae	Nymphalinae		Euphydryas	Euphydryas cynthia		Peter Sonderegger	petersonderegger@bluewin.ch
GBIFCH-BOL_LEPAA_0624	Arthropoda	Insecta	Lepidoptera	Nymphalidae	Nymphalinae		Euphydryas	Euphydryas aurinia	Euphydryas aurinia glaciegenita	Peter Sonderegger	petersonderegger@bluewin.ch
GBIFCH-BOL_LEPAA_0625	Arthropoda	Insecta	Lepidoptera	Pieridae	Dismorphiinae		Leptidea	Leptidea sinapis		Yannick Chittaro		identified by genitalia, anatomically
GBIFCH-BOL_LEPAA_0626	Arthropoda	Insecta	Lepidoptera	Nymphalidae	Limenitidinae		Limenitis	Limenitis reducta		Peter Sonderegger	petersonderegger@bluewin.ch
GBIFCH-BOL_LEPAA_0627	Arthropoda	Insecta	Lepidoptera	Nymphalidae	Satyrinae		Lopinga	Lopinga achine		Peter Sonderegger	petersonderegger@bluewin.ch
GBIFCH-BOL_LEPAA_0628	Arthropoda	Insecta	Lepidoptera	Lycaenidae	Polyommatinae		Polyommatus	Polyommatus dorylas		Emmanuel Wermeille
GBIFCH-BOL_LEPAA_0629	Arthropoda	Insecta	Lepidoptera	Zygaenidae	Zygaeninae		Zygaena	Zygaena transalpina		Raymond Guenin
GBIFCH-BOL_LEPAA_0630	Arthropoda	Insecta	Lepidoptera	Lycaenidae	Lycaeninae		Lycaena	Lycaena phlaeas		Peter Sonderegger	petersonderegger@bluewin.ch
GBIFCH-BOL_LEPAA_0631	Arthropoda	Insecta	Lepidoptera	Lycaenidae	Polyommatinae		Agriades	Agriades glandon		Peter Sonderegger	petersonderegger@bluewin.ch
GBIFCH-BOL_LEPAA_0632	Arthropoda	Insecta	Lepidoptera	Hesperiidae	Pyrginae		Pyrgus	Pyrgus armoricanus		Peter Sonderegger	petersonderegger@bluewin.ch
GBIFCH-BOL_LEPAA_0633	Arthropoda	Insecta	Lepidoptera	Hesperiidae	Pyrginae		Pyrgus	Pyrgus armoricanus		Peter Sonderegger	petersonderegger@bluewin.ch
GBIFCH-BOL_LEPAA_0634	Arthropoda	Insecta	Lepidoptera	Lycaenidae	Lycaeninae		Lycaena	Lycaena tityrus	Lycaena tityrus subalpina	Peter Sonderegger	petersonderegger@bluewin.ch
GBIFCH-BOL_LEPAA_0635	Arthropoda	Insecta	Lepidoptera	Nymphalidae	Nymphalinae		Melitaea	Melitaea nevadensis		Peter Sonderegger	petersonderegger@bluewin.ch
GBIFCH-BOL_LEPAA_0636	Arthropoda	Insecta	Lepidoptera	Lycaenidae	Theclinae		Thecla	Thecla betulae		Peter Sonderegger	petersonderegger@bluewin.ch
GBIFCH-BOL_LEPAA_0637	Arthropoda	Insecta	Lepidoptera	Lycaenidae	Polyommatinae		Aricia	Aricia agestis		Peter Sonderegger	petersonderegger@bluewin.ch
GBIFCH-BOL_LEPAA_0638	Arthropoda	Insecta	Lepidoptera	Hesperiidae	Pyrginae		Spialia	Spialia sertorius		Peter Sonderegger	petersonderegger@bluewin.ch
GBIFCH-BOL_LEPAA_0639	Arthropoda	Insecta	Lepidoptera	Papilionidae	Parnassiinae		Parnassius	Parnassius apollo		Peter Sonderegger	petersonderegger@bluewin.ch
GBIFCH-BOL_LEPAA_0640	Arthropoda	Insecta	Lepidoptera	Lycaenidae	Polyommatinae		Lysandra	Lysandra coridon		Peter Sonderegger	petersonderegger@bluewin.ch
GBIFCH-BOL_LEPAA_0641	Arthropoda	Insecta	Lepidoptera	Hesperiidae	Hesperiinae		Thymelicus	Thymelicus sylvestris		Peter Sonderegger	petersonderegger@bluewin.ch
GBIFCH-BOL_LEPAA_0642	Arthropoda	Insecta	Lepidoptera	Nymphalidae	Heliconiinae		Boloria	Boloria selene		Peter Sonderegger	petersonderegger@bluewin.ch
GBIFCH-BOL_LEPAA_0643	Arthropoda	Insecta	Lepidoptera	Hesperiidae	Pyrginae		Pyrgus	Pyrgus cacaliae		Peter Sonderegger	petersonderegger@bluewin.ch
GBIFCH-BOL_LEPAA_0644	Arthropoda	Insecta	Lepidoptera	Nymphalidae	Satyrinae		Erebia	Erebia tyndarus		Yannick Chittaro
GBIFCH-BOL_LEPAA_0645	Arthropoda	Insecta	Lepidoptera	Zygaenidae	Zygaeninae		Zygaena	Zygaena purpuralis		Raymond Guenin		identified by genitalia, anatomically
GBIFCH-BOL_LEPAA_0646	Arthropoda	Insecta	Lepidoptera	Nymphalidae	Satyrinae		Erebia	Erebia mnestra		Peter Sonderegger	petersonderegger@bluewin.ch	identified by genitalia, anatomically
GBIFCH-BOL_LEPAA_0647	Arthropoda	Insecta	Lepidoptera	Lycaenidae	Polyommatinae		Polyommatus	Polyommatus amandus		Yannick Chittaro
GBIFCH-BOL_LEPAA_0648	Arthropoda	Insecta	Lepidoptera	Nymphalidae	Limenitidinae		Neptis	Neptis rivularis		Yannick Chittaro
GBIFCH-BOL_LEPAA_0649	Arthropoda	Insecta	Lepidoptera	Nymphalidae	Nymphalinae		Melitaea	Melitaea asteria		Yannick Chittaro		captured, identified in hand
GBIFCH-BOL_LEPAA_0650	Arthropoda	Insecta	Lepidoptera	Hesperiidae	Pyrginae		Pyrgus	Pyrgus warrenensis		Yannick Chittaro		identified by genitalia, anatomically
GBIFCH-BOL_LEPAA_0651	Arthropoda	Insecta	Lepidoptera	Zygaenidae	Zygaeninae		Zygaena	Zygaena osterodensis		Yannick Chittaro
GBIFCH-BOL_LEPAA_0652	Arthropoda	Insecta	Lepidoptera	Zygaenidae	Zygaeninae		Zygaena	Zygaena minos		Raymond Guenin
GBIFCH-BOL_LEPAA_0653	Arthropoda	Insecta	Lepidoptera	Nymphalidae	Satyrinae		Pyronia	Pyronia tithonus		Peter Sonderegger	petersonderegger@bluewin.ch
GBIFCH-BOL_LEPAA_0654	Arthropoda	Insecta	Lepidoptera	Lycaenidae	Theclinae		Favonius	Favonius quercus		Peter Sonderegger	petersonderegger@bluewin.ch
GBIFCH-BOL_LEPAA_0655	Arthropoda	Insecta	Lepidoptera	Nymphalidae	Satyrinae		Maniola	Maniola jurtina		Peter Sonderegger	petersonderegger@bluewin.ch
GBIFCH-BOL_LEPAA_0656	Arthropoda	Insecta	Lepidoptera	Hesperiidae	Pyrginae		Pyrgus	Pyrgus armoricanus		Peter Sonderegger	petersonderegger@bluewin.ch
GBIFCH-BOL_LEPAA_0657	Arthropoda	Insecta	Lepidoptera	Pieridae	Coliadinae		Gonepteryx	Gonepteryx rhamni		Yannick Chittaro
GBIFCH-BOL_LEPAA_0658	Arthropoda	Insecta	Lepidoptera	Pieridae	Coliadinae		Colias	Colias hyale		Yannick Chittaro
GBIFCH-BOL_LEPAA_0659	Arthropoda	Insecta	Lepidoptera	Pieridae	Coliadinae		Colias	Colias alfacariensis		Yannick Chittaro
GBIFCH-BOL_LEPAA_0660	Arthropoda	Insecta	Lepidoptera	Pieridae	Pierinae		Pieris	Pieris brassicae		Yannick Chittaro
GBIFCH-BOL_LEPAA_0661	Arthropoda	Insecta	Lepidoptera	Pieridae	Coliadinae		Colias	Colias alfacariensis		Yannick Chittaro
GBIFCH-BOL_LEPAA_0662	Arthropoda	Insecta	Lepidoptera	Pieridae	Pierinae		Pieris	Pieris napi		Yannick Chittaro
GBIFCH-BOL_LEPAA_0663	Arthropoda	Insecta	Lepidoptera	Nymphalidae	Nymphalinae		Araschnia	Araschnia levana		Yannick Chittaro
GBIFCH-BOL_LEPAA_0664	Arthropoda	Insecta	Lepidoptera	Nymphalidae	Nymphalinae		Melitaea	Melitaea nevadensis		Yannick Chittaro		identified by genitalia, anatomically
GBIFCH-BOL_LEPAA_0665	Arthropoda	Insecta	Lepidoptera	Lycaenidae	Polyommatinae		Cupido	Cupido argiades		Yannick Chittaro
GBIFCH-BOL_LEPAA_0666	Arthropoda	Insecta	Lepidoptera	Lycaenidae	Lycaeninae		Lycaena	Lycaena tityrus	Lycaena tityrus tityrus	Yannick Chittaro
GBIFCH-BOL_LEPAA_0667	Arthropoda	Insecta	Lepidoptera	Nymphalidae	Satyrinae		Erebia	Erebia arvernensis		Yannick Chittaro
GBIFCH-BOL_LEPAA_0668	Arthropoda	Insecta	Lepidoptera	Nymphalidae	Satyrinae		Erebia	Erebia manto		Yannick Chittaro
GBIFCH-BOL_LEPAA_0669	Arthropoda	Insecta	Lepidoptera	Nymphalidae	Satyrinae		Pyronia	Pyronia tithonus		Yannick Chittaro
GBIFCH-BOL_LEPAA_0670	Arthropoda	Insecta	Lepidoptera	Lycaenidae	Polyommatinae		Lampides	Lampides boeticus		Marie-christine Chittaro
GBIFCH-BOL_LEPAA_0671	Arthropoda	Insecta	Lepidoptera	Nymphalidae	Satyrinae		Oeneis	Oeneis glacialis		Yannick Chittaro
GBIFCH-BOL_LEPAA_0672	Arthropoda	Insecta	Lepidoptera	Lycaenidae	Polyommatinae		Phengaris	Phengaris alcon		Yannick Chittaro			ecotype dryland
GBIFCH-BOL_LEPAA_0673	Arthropoda	Insecta	Lepidoptera	Zygaenidae	Procridinae		Adscita	Adscita geryon		Raymond Guenin		identified by genitalia, anatomically
GBIFCH-BOL_LEPAA_0674	Arthropoda	Insecta	Lepidoptera	Lycaenidae	Polyommatinae		Lysandra	Lysandra coridon		Yannick Chittaro
GBIFCH-BOL_LEPAA_0675	Arthropoda	Insecta	Lepidoptera	Zygaenidae	Zygaeninae		Zygaena	Zygaena exulans		Yannick Chittaro
GBIFCH-BOL_LEPAA_0676	Arthropoda	Insecta	Lepidoptera	Lycaenidae	Lycaeninae		Lycaena	Lycaena virgaureae		Yannick Chittaro
GBIFCH-BOL_LEPAA_0677	Arthropoda	Insecta	Lepidoptera	Lycaenidae	Polyommatinae		Cupido	Cupido argiades		Yannick Chittaro
GBIFCH-BOL_LEPAA_0678	Arthropoda	Insecta	Lepidoptera	Nymphalidae	Satyrinae		Coenonympha	Coenonympha gardetta		Yannick Chittaro
GBIFCH-BOL_LEPAA_0679	Arthropoda	Insecta	Lepidoptera	Pieridae	Pierinae		Euchloe	Euchloe simplonia		Yannick Chittaro
GBIFCH-BOL_LEPAA_0680	Arthropoda	Insecta	Lepidoptera	Pieridae	Coliadinae		Colias	Colias palaeno		Yannick Chittaro
GBIFCH-BOL_LEPAA_0681	Arthropoda	Insecta	Lepidoptera	Nymphalidae	Heliconiinae		Argynnis	Argynnis paphia		Yannick Chittaro
GBIFCH-BOL_LEPAA_0682	Arthropoda	Insecta	Lepidoptera	Nymphalidae	Satyrinae		Brintesia	Brintesia circe		Yannick Chittaro
GBIFCH-BOL_LEPAA_0683	Arthropoda	Insecta	Lepidoptera	Nymphalidae	Heliconiinae		Boloria	Boloria titania		Yannick Chittaro
GBIFCH-BOL_LEPAA_0684	Arthropoda	Insecta	Lepidoptera	Lycaenidae	Lycaeninae		Lycaena	Lycaena hippothoe		Yannick Chittaro
GBIFCH-BOL_LEPAA_0685	Arthropoda	Insecta	Lepidoptera	Nymphalidae	Satyrinae		Brintesia	Brintesia circe		Yannick Chittaro
GBIFCH-BOL_LEPAA_0686	Arthropoda	Insecta	Lepidoptera	Nymphalidae	Satyrinae		Erebia	Erebia epiphron		Yannick Chittaro
GBIFCH-BOL_LEPAA_0687	Arthropoda	Insecta	Lepidoptera	Hesperiidae	Pyrginae		Pyrgus	Pyrgus alveus		Yannick Chittaro		identified by genitalia, anatomically
GBIFCH-BOL_LEPAA_0688	Arthropoda	Insecta	Lepidoptera	Lycaenidae	Polyommatinae		Pseudophilotes	Pseudophilotes baton		Yannick Chittaro
GBIFCH-BOL_LEPAA_0689	Arthropoda	Insecta	Lepidoptera	Lycaenidae	Polyommatinae		Cupido	Cupido argiades		Yannick Chittaro
GBIFCH-BOL_LEPAA_0690	Arthropoda	Insecta	Lepidoptera	Lycaenidae	Polyommatinae		Kretania	Kretania trappi		Yannick Chittaro
GBIFCH-BOL_LEPAA_0691	Arthropoda	Insecta	Lepidoptera	Lycaenidae	Polyommatinae		Cyaniris	Cyaniris semiargus		Yannick Chittaro
GBIFCH-BOL_LEPAA_0692	Arthropoda	Insecta	Lepidoptera	Lycaenidae	Polyommatinae		Cupido	Cupido alcetas		Yannick Chittaro
GBIFCH-BOL_LEPAA_0693	Arthropoda	Insecta	Lepidoptera	Lycaenidae	Polyommatinae		Aricia	Aricia artaxerxes		Yannick Chittaro
GBIFCH-BOL_LEPAA_0694	Arthropoda	Insecta	Lepidoptera	Lycaenidae	Lycaeninae		Lycaena	Lycaena hippothoe	Lycaena hippothoe eurydice	Yannick Chittaro
GBIFCH-BOL_LEPAA_0695	Arthropoda	Insecta	Lepidoptera	Nymphalidae	Nymphalinae		Araschnia	Araschnia levana		Yannick Chittaro
GBIFCH-BOL_LEPAA_0696	Arthropoda	Insecta	Lepidoptera	Nymphalidae	Heliconiinae		Boloria	Boloria dia		Yannick Chittaro
GBIFCH-BOL_LEPAA_0697	Arthropoda	Insecta	Lepidoptera	Lycaenidae	Lycaeninae		Lycaena	Lycaena alciphron		Yannick Chittaro
GBIFCH-BOL_LEPAA_0698	Arthropoda	Insecta	Lepidoptera	Nymphalidae	Heliconiinae		Boloria	Boloria dia		Yannick Chittaro
GBIFCH-BOL_LEPAA_0699	Arthropoda	Insecta	Lepidoptera	Nymphalidae	Nymphalinae		Melitaea	Melitaea aurelia		Yannick Chittaro		identified by genitalia, anatomically
GBIFCH-BOL_LEPAA_0700	Arthropoda	Insecta	Lepidoptera	Nymphalidae	Satyrinae		Lopinga	Lopinga achine		Yannick Chittaro
GBIFCH-BOL_LEPAA_0701	Arthropoda	Insecta	Lepidoptera	Lycaenidae	Polyommatinae		Iolana	Iolana iolas		Yannick Chittaro
GBIFCH-BOL_LEPAA_0702	Arthropoda	Insecta	Lepidoptera	Lycaenidae	Theclinae		Satyrium	Satyrium pruni		Yannick Chittaro
GBIFCH-BOL_LEPAA_0703	Arthropoda	Insecta	Lepidoptera	Lycaenidae	Theclinae		Satyrium	Satyrium pruni		Yannick Chittaro
GBIFCH-BOL_LEPAA_0704	Arthropoda	Insecta	Lepidoptera	Lycaenidae	Polyommatinae		Polyommatus	Polyommatus thersites		Yannick Chittaro
GBIFCH-BOL_LEPAA_0705	Arthropoda	Insecta	Lepidoptera	Lycaenidae	Lycaeninae		Lycaena	Lycaena helle		Yannick Chittaro
GBIFCH-BOL_LEPAA_0706	Arthropoda	Insecta	Lepidoptera	Lycaenidae	Lycaeninae		Lycaena	Lycaena helle		Yannick Chittaro
GBIFCH-BOL_LEPAA_0707	Arthropoda	Insecta	Lepidoptera	Lycaenidae	Theclinae		Satyrium	Satyrium w-album		Yannick Chittaro
GBIFCH-BOL_LEPAA_0708	Arthropoda	Insecta	Lepidoptera	Nymphalidae	Nymphalinae		Euphydryas	Euphydryas aurinia	Euphydryas aurinia aurinia	Yannick Chittaro
GBIFCH-BOL_LEPAA_0709	Arthropoda	Insecta	Lepidoptera	Nymphalidae	Nymphalinae		Melitaea	Melitaea diamina		Yannick Chittaro
GBIFCH-BOL_LEPAA_0710	Arthropoda	Insecta	Lepidoptera	Riodinidae	Nemeobiinae		Hamearis	Hamearis lucina		Yannick Chittaro
GBIFCH-BOL_LEPAA_0711	Arthropoda	Insecta	Lepidoptera	Nymphalidae	Nymphalinae		Nymphalis	Nymphalis polychloros		Yannick Chittaro
GBIFCH-BOL_LEPAA_0712	Arthropoda	Insecta	Lepidoptera	Nymphalidae	Satyrinae		Hyponephele	Hyponephele lycaon		Yannick Chittaro
GBIFCH-BOL_LEPAA_0713	Arthropoda	Insecta	Lepidoptera	Nymphalidae	Satyrinae		Erebia	Erebia bubastis		Yannick Chittaro		identified by genitalia, anatomically
GBIFCH-BOL_LEPAA_0714	Arthropoda	Insecta	Lepidoptera	Hesperiidae	Pyrginae		Pyrgus	Pyrgus malvoides		Yannick Chittaro		identified by genitalia, anatomically
GBIFCH-BOL_LEPAA_0715	Arthropoda	Insecta	Lepidoptera	Nymphalidae	Satyrinae		Hipparchia	Hipparchia genava		Yannick Chittaro
GBIFCH-BOL_LEPAA_0716	Arthropoda	Insecta	Lepidoptera	Nymphalidae	Nymphalinae		Melitaea	Melitaea deione		Yannick Chittaro
GBIFCH-BOL_LEPAA_0717	Arthropoda	Insecta	Lepidoptera	Nymphalidae	Heliconiinae		Boloria	Boloria selene		Yannick Chittaro
GBIFCH-BOL_LEPAA_0718	Arthropoda	Insecta	Lepidoptera	Nymphalidae	Heliconiinae		Boloria	Boloria thore		Yannick Chittaro
GBIFCH-BOL_LEPAA_0719	Arthropoda	Insecta	Lepidoptera	Nymphalidae	Nymphalinae		Nymphalis	Nymphalis polychloros		Yannick Chittaro
GBIFCH-BOL_LEPAA_0720	Arthropoda	Insecta	Lepidoptera	Nymphalidae	Heliconiinae		Brenthis	Brenthis ino		Yannick Chittaro
GBIFCH-BOL_LEPAA_0721	Arthropoda	Insecta	Lepidoptera	Nymphalidae	Heliconiinae		Boloria	Boloria selene		Yannick Chittaro
GBIFCH-BOL_LEPAA_0722	Arthropoda	Insecta	Lepidoptera	Nymphalidae	Heliconiinae		Boloria	Boloria aquilonaris		Yannick Chittaro
GBIFCH-BOL_LEPAA_0723	Arthropoda	Insecta	Lepidoptera	Lycaenidae	Lycaeninae		Lycaena	Lycaena dispar		Yannick Chittaro
GBIFCH-BOL_LEPAA_0724	Arthropoda	Insecta	Lepidoptera	Zygaenidae	Zygaeninae		Zygaena	Zygaena osterodensis		Yannick Chittaro
GBIFCH-BOL_LEPAA_0725	Arthropoda	Insecta	Lepidoptera	Nymphalidae	Satyrinae		Erebia	Erebia nivalis		Yannick Chittaro
GBIFCH-BOL_LEPAA_0726	Arthropoda	Insecta	Lepidoptera	Nymphalidae	Satyrinae		Erebia	Erebia flavofasciata		Yannick Chittaro
GBIFCH-BOL_LEPAA_0727	Arthropoda	Insecta	Lepidoptera	Nymphalidae	Nymphalinae		Nymphalis	Nymphalis antiopa		Yannick Chittaro
GBIFCH-BOL_LEPAA_0728	Arthropoda	Insecta	Lepidoptera	Nymphalidae	Satyrinae		Pyronia	Pyronia tithonus		Yannick Chittaro
GBIFCH-BOL_LEPAA_0729	Arthropoda	Insecta	Lepidoptera	Nymphalidae	Satyrinae		Coenonympha	Coenonympha glycerion		Yannick Chittaro
GBIFCH-BOL_LEPAA_0730	Arthropoda	Insecta	Lepidoptera	Nymphalidae	Satyrinae		Coenonympha	Coenonympha arcania		Yannick Chittaro
GBIFCH-BOL_LEPAA_0731	Arthropoda	Insecta	Lepidoptera	Nymphalidae	Limenitidinae		Limenitis	Limenitis camilla		Yannick Chittaro
GBIFCH-BOL_LEPAA_0732	Arthropoda	Insecta	Lepidoptera	Nymphalidae	Apaturinae		Apatura	Apatura ilia		Yannick Chittaro
GBIFCH-BOL_LEPAA_0733	Arthropoda	Insecta	Lepidoptera	Hesperiidae	Pyrginae		Pyrgus	Pyrgus carthami		Yannick Chittaro
GBIFCH-BOL_LEPAA_0734	Arthropoda	Insecta	Lepidoptera	Lycaenidae	Polyommatinae		Phengaris	Phengaris nausithous		Yannick Chittaro
GBIFCH-BOL_LEPAA_0735	Arthropoda	Insecta	Lepidoptera	Zygaenidae	Zygaeninae		Zygaena	Zygaena viciae		Yannick Chittaro
GBIFCH-BOL_LEPAA_0736	Arthropoda	Insecta	Lepidoptera	Hesperiidae	Pyrginae		Pyrgus	Pyrgus onopordi		Yannick Chittaro		identified by genitalia, anatomically
GBIFCH-BOL_LEPAA_0737	Arthropoda	Insecta	Lepidoptera	Hesperiidae	Pyrginae		Spialia	Spialia sertorius		Yannick Chittaro
GBIFCH-BOL_LEPAA_0738	Arthropoda	Insecta	Lepidoptera	Hesperiidae	Pyrginae		Pyrgus	Pyrgus malvae		Yannick Chittaro		identified by genitalia, anatomically
GBIFCH-BOL_LEPAA_0739	Arthropoda	Insecta	Lepidoptera	Nymphalidae	Limenitidinae		Limenitis	Limenitis populi		Yannick Chittaro
GBIFCH-BOL_LEPAA_0740	Arthropoda	Insecta	Lepidoptera	Nymphalidae	Apaturinae		Apatura	Apatura ilia		Yannick Chittaro
GBIFCH-BOL_LEPAA_0741	Arthropoda	Insecta	Lepidoptera	Papilionidae	Papilioninae		Iphiclides	Iphiclides podalirius		Yannick Chittaro
GBIFCH-BOL_LEPAA_0742	Arthropoda	Insecta	Lepidoptera	Nymphalidae	Satyrinae		Brintesia	Brintesia circe		Yannick Chittaro
GBIFCH-BOL_LEPAA_0743	Arthropoda	Insecta	Lepidoptera	Papilionidae	Parnassiinae		Parnassius	Parnassius mnemosyne		Yannick Chittaro
GBIFCH-BOL_LEPAA_0744	Arthropoda	Insecta	Lepidoptera	Nymphalidae	Satyrinae		Erebia	Erebia eriphyle		Yannick Chittaro
GBIFCH-BOL_LEPAA_0745	Arthropoda	Insecta	Lepidoptera	Pieridae	Dismorphiinae		Leptidea	Leptidea sinapis		Yannick Chittaro
GBIFCH-BOL_LEPAA_0746	Arthropoda	Insecta	Lepidoptera	Zygaenidae	Procridinae		Rhagades	Rhagades pruni		Yannick Chittaro
GBIFCH-BOL_LEPAA_0747	Arthropoda	Insecta	Lepidoptera	Hesperiidae	Pyrginae		Carcharodus	Carcharodus floccifera		Yannick Chittaro
GBIFCH-BOL_LEPAA_0748	Arthropoda	Insecta	Lepidoptera	Zygaenidae	Zygaeninae		Zygaena	Zygaena carniolica		Yannick Chittaro
GBIFCH-BOL_LEPAA_0749	Arthropoda	Insecta	Lepidoptera	Pieridae	Coliadinae		Colias	Colias palaeno		Yannick Chittaro
GBIFCH-BOL_LEPAA_0750	Arthropoda	Insecta	Lepidoptera	Pieridae	Pierinae		Pieris	Pieris mannii		Yannick Chittaro
GBIFCH-BOL_LEPAA_0751	Arthropoda	Insecta	Lepidoptera	Nymphalidae	Satyrinae		Satyrus	Satyrus ferula		Yannick Chittaro
GBIFCH-BOL_LEPAA_0752	Arthropoda	Insecta	Lepidoptera	Nymphalidae	Apaturinae		Apatura	Apatura iris		Yannick Chittaro
GBIFCH-BOL_LEPAA_0753	Arthropoda	Insecta	Lepidoptera	Nymphalidae	Nymphalinae		Vanessa	Vanessa atalanta		Yannick Chittaro
GBIFCH-BOL_LEPAA_0754	Arthropoda	Insecta	Lepidoptera	Hesperiidae	Pyrginae		Carcharodus	Carcharodus lavatherae		Yannick Chittaro
GBIFCH-BOL_LEPAA_0755	Arthropoda	Insecta	Lepidoptera	Hesperiidae	Pyrginae		Pyrgus	Pyrgus alveus		Yannick Chittaro		identified by genitalia, anatomically
GBIFCH-BOL_LEPAA_0756	Arthropoda	Insecta	Lepidoptera	Zygaenidae	Zygaeninae		Zygaena	Zygaena carniolica		Yannick Chittaro
GBIFCH-BOL_LEPAA_0757	Arthropoda	Insecta	Lepidoptera	Nymphalidae	Heliconiinae		Fabriciana	Fabriciana adippe		Yannick Chittaro
GBIFCH-BOL_LEPAA_0758	Arthropoda	Insecta	Lepidoptera	Nymphalidae	Satyrinae		Erebia	Erebia euryale		Yannick Chittaro
GBIFCH-BOL_LEPAA_0759	Arthropoda	Insecta	Lepidoptera	Zygaenidae	Zygaeninae		Zygaena	Zygaena romeo		Yannick Chittaro
GBIFCH-BOL_LEPAA_0760	Arthropoda	Insecta	Lepidoptera	Lycaenidae	Lycaeninae		Lycaena	Lycaena alciphron		Yannick Chittaro
GBIFCH-BOL_LEPAA_0761	Arthropoda	Insecta	Lepidoptera	Nymphalidae	Heliconiinae		Boloria	Boloria euphrosyne		Yannick Chittaro
GBIFCH-BOL_LEPAA_0762	Arthropoda	Insecta	Lepidoptera	Zygaenidae	Procridinae		Jordanita	Jordanita subsolana		Laurent Juillerat		identified by genitalia, anatomically
GBIFCH-BOL_LEPAA_0763	Arthropoda	Insecta	Lepidoptera	Zygaenidae	Procridinae		Jordanita	Jordanita subsolana		Yannick Chittaro
GBIFCH-BOL_LEPAA_0764	Arthropoda	Insecta	Lepidoptera	Zygaenidae	Procridinae		Jordanita	Jordanita globulariae		Emmanuel Wermeille		identified by genitalia, anatomically
GBIFCH-BOL_LEPAA_0765	Arthropoda	Insecta	Lepidoptera	Lycaenidae	Polyommatinae		Aricia	Aricia nicias		Yannick Chittaro		captured, identified in hand
GBIFCH-BOL_LEPAA_0766	Arthropoda	Insecta	Lepidoptera	Zygaenidae	Zygaeninae		Zygaena	Zygaena carniolica		Jerome Fournier		captured, identified in hand
GBIFCH-BOL_LEPAA_0767	Arthropoda	Insecta	Lepidoptera	Hesperiidae	Pyrginae		Carcharodus	Carcharodus lavatherae		Yannick Chittaro		captured, identified in hand
GBIFCH-BOL_LEPAA_0768	Arthropoda	Insecta	Lepidoptera	Hesperiidae	Pyrginae		Carcharodus	Carcharodus floccifera		Yannick Chittaro		captured, identified in hand
GBIFCH-BOL_LEPAA_0769	Arthropoda	Insecta	Lepidoptera	Zygaenidae	Zygaeninae		Zygaena	Zygaena minos		Raymond Guenin		captured, identified in hand
GBIFCH-BOL_LEPAA_0770	Arthropoda	Insecta	Lepidoptera	Zygaenidae	Zygaeninae		Zygaena	Zygaena purpuralis		Raymond Guenin		captured, identified in hand
GBIFCH-BOL_LEPAA_0771	Arthropoda	Insecta	Lepidoptera	Zygaenidae	Zygaeninae		Zygaena	Zygaena minos		Raymond Guenin		identified by genitalia, anatomically
GBIFCH-BOL_LEPAA_0772	Arthropoda	Insecta	Lepidoptera	Lycaenidae	Polyommatinae		Phengaris	Phengaris alcon		Yannick Chittaro		identified under binocular microscope	ecotype dryland
GBIFCH-BOL_LEPAA_0773	Arthropoda	Insecta	Lepidoptera	Lycaenidae	Polyommatinae		Cupido	Cupido osiris		Yannick Chittaro
GBIFCH-BOL_LEPAA_0774	Arthropoda	Insecta	Lepidoptera	Nymphalidae	Satyrinae		Erebia	Erebia flavofasciata		Yannick Chittaro		captured, identified in hand
GBIFCH-BOL_LEPAA_0775	Arthropoda	Insecta	Lepidoptera	Nymphalidae	Satyrinae		Erebia	Erebia nivalis		Emmanuel Wermeille		identified by genitalia, anatomically
GBIFCH-BOL_LEPAA_0776	Arthropoda	Insecta	Lepidoptera	Lycaenidae	Polyommatinae		Iolana	Iolana iolas		Yves Gonseth
GBIFCH-BOL_LEPAA_0777	Arthropoda	Insecta	Lepidoptera	Nymphalidae	Satyrinae		Erebia	Erebia pronoe		Yannick Chittaro		captured, identified in hand
GBIFCH-BOL_LEPAA_0778	Arthropoda	Insecta	Lepidoptera	Nymphalidae	Satyrinae		Erebia	Erebia meolans		Yannick Chittaro		captured, identified in hand
GBIFCH-BOL_LEPAA_0779	Arthropoda	Insecta	Lepidoptera	Nymphalidae	Satyrinae		Erebia	Erebia styx		Yannick Chittaro		identified by genitalia, anatomically
GBIFCH-BOL_LEPAA_0780	Arthropoda	Insecta	Lepidoptera	Nymphalidae	Limenitidinae		Limenitis	Limenitis camilla		Peter Sonderegger	petersonderegger@bluewin.ch
GBIFCH-BOL_LEPAA_0781	Arthropoda	Insecta	Lepidoptera	Nymphalidae	Heliconiinae		Brenthis	Brenthis daphne		Peter Sonderegger	petersonderegger@bluewin.ch
GBIFCH-BOL_LEPAA_0782	Arthropoda	Insecta	Lepidoptera	Nymphalidae	Satyrinae		Hipparchia	Hipparchia genava				identified under binocular microscope
GBIFCH-BOL_LEPAA_0783	Arthropoda	Insecta	Lepidoptera	Nymphalidae	Satyrinae		Hipparchia	Hipparchia genava		Markus Fluri		identified by genitalia, anatomically
GBIFCH-BOL_LEPAA_0784	Arthropoda	Insecta	Lepidoptera	Nymphalidae	Satyrinae		Erebia	Erebia sudetica		Peter Sonderegger	petersonderegger@bluewin.ch	identified by genitalia, anatomically
GBIFCH-BOL_LEPAA_0785	Arthropoda	Insecta	Lepidoptera	Lycaenidae	Polyommatinae		Phengaris	Phengaris alcon		Peter Sonderegger	petersonderegger@bluewin.ch		ecotype wetland
GBIFCH-BOL_LEPAA_0786	Arthropoda	Insecta	Lepidoptera	Nymphalidae	Satyrinae		Pararge	Pararge aegeria		Emmanuel Wermeille
GBIFCH-BOL_LEPAA_0787	Arthropoda	Insecta	Lepidoptera	Nymphalidae	Satyrinae		Erebia	Erebia arvernensis		Emmanuel Wermeille		identified by genitalia, anatomically
GBIFCH-BOL_LEPAA_0788	Arthropoda	Insecta	Lepidoptera	Zygaenidae	Zygaeninae		Zygaena	Zygaena osterodensis		Raymond Guenin		identified by genitalia, anatomically
GBIFCH-BOL_LEPAA_0789	Arthropoda	Insecta	Lepidoptera	Hesperiidae	Pyrginae		Pyrgus	Pyrgus armoricanus		Peter Sonderegger	petersonderegger@bluewin.ch	identified by genitalia, anatomically
GBIFCH-BOL_LEPAA_0790	Arthropoda	Insecta	Lepidoptera	Lycaenidae	Polyommatinae		Scolitantides	Scolitantides orion		Yannick Chittaro		captured, identified in hand
GBIFCH-BOL_LEPAA_0791	Arthropoda	Insecta	Lepidoptera	Lycaenidae	Polyommatinae		Cupido	Cupido osiris		Jerome Fournier		captured, identified in hand
GBIFCH-BOL_LEPAA_0792	Arthropoda	Insecta	Lepidoptera	Lycaenidae	Polyommatinae		Kretania	Kretania trappi		Paul Marchesi		captured, identified in hand
GBIFCH-BOL_LEPAA_0793	Arthropoda	Insecta	Lepidoptera	Lycaenidae	Polyommatinae		Pseudophilotes	Pseudophilotes baton		Peter Sonderegger	petersonderegger@bluewin.ch
GBIFCH-BOL_LEPAA_0794	Arthropoda	Insecta	Lepidoptera	Lycaenidae	Polyommatinae		Plebejus	Plebejus argyrognomon		Yannick Chittaro		captured, identified in hand
GBIFCH-BOL_LEPAA_0795	Arthropoda	Insecta	Lepidoptera	Lycaenidae	Theclinae		Satyrium	Satyrium ilicis		Laurent Juillerat		identified under binocular microscope
GBIFCH-BOL_LEPAA_0796	Arthropoda	Insecta	Lepidoptera	Lycaenidae	Theclinae		Satyrium	Satyrium spini		Barbara Wicht
GBIFCH-BOL_LEPAA_0797	Arthropoda	Insecta	Lepidoptera	Lycaenidae	Polyommatinae		Polyommatus	Polyommatus amandus		Peter Sonderegger	petersonderegger@bluewin.ch
GBIFCH-BOL_LEPAA_0798	Arthropoda	Insecta	Lepidoptera	Zygaenidae	Procridinae		Adscita	Adscita geryon		Raymond Guenin		identified by genitalia, anatomically
GBIFCH-BOL_LEPAA_0799	Arthropoda	Insecta	Lepidoptera	Lycaenidae	Theclinae		Satyrium	Satyrium ilicis		Paul Marchesi		captured, identified in hand
GBIFCH-BOL_LEPAA_0800	Arthropoda	Insecta	Lepidoptera	Hesperiidae	Pyrginae		Pyrgus	Pyrgus serratulae		Yannick Chittaro		identified by genitalia, anatomically
GBIFCH-BOL_LEPAA_0801	Arthropoda	Insecta	Lepidoptera	Hesperiidae	Pyrginae		Pyrgus	Pyrgus cirsii
GBIFCH-BOL_LEPAA_0802	Arthropoda	Insecta	Lepidoptera	Hesperiidae	Pyrginae		Pyrgus	Pyrgus carlinae		Laurent Juillerat		identified by genitalia, anatomically
GBIFCH-BOL_LEPAA_0803	Arthropoda	Insecta	Lepidoptera	Lycaenidae	Polyommatinae		Polyommatus	Polyommatus daphnis		Jerome Fournier		captured, identified in hand
GBIFCH-BOL_LEPAA_0804	Arthropoda	Insecta	Lepidoptera	Hesperiidae	Pyrginae		Pyrgus	Pyrgus accreta		Yannick Chittaro		identified by genitalia, anatomically
GBIFCH-BOL_LEPAA_0805	Arthropoda	Insecta	Lepidoptera	Lycaenidae	Polyommatinae		Plebejus	Plebejus argyrognomon		Gilles Carron		identified by genitalia, anatomically
GBIFCH-BOL_LEPAA_0806	Arthropoda	Insecta	Lepidoptera	Hesperiidae	Pyrginae		Pyrgus	Pyrgus warrenensis				captured, identified in hand
GBIFCH-BOL_LEPAA_0807	Arthropoda	Insecta	Lepidoptera	Zygaenidae	Procridinae		Jordanita	Jordanita globulariae		Yannick Chittaro		identified by genitalia, anatomically
GBIFCH-BOL_LEPAA_0808	Arthropoda	Insecta	Lepidoptera	Hesperiidae	Pyrginae		Pyrgus	Pyrgus carthami		Yannick Chittaro		identified at sight
GBIFCH-BOL_LEPAA_0809	Arthropoda	Insecta	Lepidoptera	Nymphalidae	Nymphalinae		Melitaea	Melitaea asteria		Remo Wenger		captured, identified in hand
GBIFCH-BOL_LEPAA_0810	Arthropoda	Insecta	Lepidoptera	Lycaenidae	Polyommatinae		Phengaris	Phengaris alcon		Michel Joss			ecotype dryland
GBIFCH-BOL_LEPAA_0811	Arthropoda	Insecta	Lepidoptera	Nymphalidae	Nymphalinae		Aglais	Aglais io		Peter Sonderegger	petersonderegger@bluewin.ch
GBIFCH-BOL_LEPAA_0812	Arthropoda	Insecta	Lepidoptera	Lycaenidae	Polyommatinae		Polyommatus	Polyommatus icarus		Peter Sonderegger	petersonderegger@bluewin.ch
GBIFCH-BOL_LEPAA_0813	Arthropoda	Insecta	Lepidoptera	Nymphalidae	Satyrinae		Coenonympha	Coenonympha pamphilus		Peter Sonderegger	petersonderegger@bluewin.ch
GBIFCH-BOL_LEPAA_0814	Arthropoda	Insecta	Lepidoptera	Lycaenidae	Polyommatinae		Cupido	Cupido argiades		Peter Sonderegger	petersonderegger@bluewin.ch
GBIFCH-BOL_LEPAA_0815	Arthropoda	Insecta	Lepidoptera	Lycaenidae	Polyommatinae		Aricia	Aricia agestis		Peter Sonderegger	petersonderegger@bluewin.ch
GBIFCH-BOL_LEPAA_0816	Arthropoda	Insecta	Lepidoptera	Lycaenidae	Lycaeninae		Lycaena	Lycaena phlaeas		Peter Sonderegger	petersonderegger@bluewin.ch
GBIFCH-BOL_LEPAA_0817	Arthropoda	Insecta	Lepidoptera	Nymphalidae	Nymphalinae		Vanessa	Vanessa atalanta		Peter Sonderegger	petersonderegger@bluewin.ch
GBIFCH-BOL_LEPAA_0818	Arthropoda	Insecta	Lepidoptera	Nymphalidae	Satyrinae		Lasiommata	Lasiommata maera		Peter Sonderegger	petersonderegger@bluewin.ch
GBIFCH-BOL_LEPAA_0819	Arthropoda	Insecta	Lepidoptera	Nymphalidae	Nymphalinae		Aglais	Aglais urticae		Peter Sonderegger	petersonderegger@bluewin.ch
GBIFCH-BOL_LEPAA_0820	Arthropoda	Insecta	Lepidoptera	Nymphalidae	Satyrinae		Lasiommata	Lasiommata megera		Peter Sonderegger	petersonderegger@bluewin.ch
GBIFCH-BOL_LEPAA_0821	Arthropoda	Insecta	Lepidoptera	Nymphalidae	Satyrinae		Pararge	Pararge aegeria		Peter Sonderegger	petersonderegger@bluewin.ch
GBIFCH-BOL_LEPAA_0822	Arthropoda	Insecta	Lepidoptera	Nymphalidae	Satyrinae		Lasiommata	Lasiommata petropolitana		Peter Sonderegger	petersonderegger@bluewin.ch
GBIFCH-BOL_LEPAA_0823	Arthropoda	Insecta	Lepidoptera	Lycaenidae	Lycaeninae		Lycaena	Lycaena phlaeas		Peter Sonderegger	petersonderegger@bluewin.ch
GBIFCH-BOL_LEPAA_0824	Arthropoda	Insecta	Lepidoptera	Lycaenidae	Polyommatinae		Lysandra	Lysandra bellargus		Peter Sonderegger	petersonderegger@bluewin.ch
GBIFCH-BOL_LEPAA_0825	Arthropoda	Insecta	Lepidoptera	Nymphalidae	Satyrinae		Erebia	Erebia ligea		Peter Sonderegger	petersonderegger@bluewin.ch
GBIFCH-BOL_LEPAA_0826	Arthropoda	Insecta	Lepidoptera	Zygaenidae	Zygaeninae		Zygaena	Zygaena lonicerae		Raymond Guenin
GBIFCH-BOL_LEPAA_0827	Arthropoda	Insecta	Lepidoptera	Nymphalidae	Nymphalinae		Polygonia	Polygonia c-album		Peter Sonderegger	petersonderegger@bluewin.ch
GBIFCH-BOL_LEPAA_0828	Arthropoda	Insecta	Lepidoptera	Pieridae	Dismorphiinae		Leptidea	Leptidea sinapis		Peter Sonderegger	petersonderegger@bluewin.ch	identified by genitalia, anatomically
GBIFCH-BOL_LEPAA_0829	Arthropoda	Insecta	Lepidoptera	Zygaenidae	Zygaeninae		Zygaena	Zygaena filipendulae		Raymond Guenin
GBIFCH-BOL_LEPAA_0830	Arthropoda	Insecta	Lepidoptera	Pieridae	Pierinae		Pieris	Pieris bryoniae		Aline Pasche
GBIFCH-BOL_LEPAA_0831	Arthropoda	Insecta	Lepidoptera	Nymphalidae	Nymphalinae		Polygonia	Polygonia c-album		Peter Sonderegger	petersonderegger@bluewin.ch
GBIFCH-BOL_LEPAA_0832	Arthropoda	Insecta	Lepidoptera	Nymphalidae	Satyrinae		Aphantopus	Aphantopus hyperantus		Peter Sonderegger	petersonderegger@bluewin.ch
GBIFCH-BOL_LEPAA_0833	Arthropoda	Insecta	Lepidoptera	Nymphalidae	Satyrinae		Lasiommata	Lasiommata petropolitana		Peter Sonderegger	petersonderegger@bluewin.ch
GBIFCH-BOL_LEPAA_0834	Arthropoda	Insecta	Lepidoptera	Zygaenidae	Zygaeninae		Zygaena	Zygaena purpuralis		Peter Sonderegger	petersonderegger@bluewin.ch
GBIFCH-BOL_LEPAA_0835	Arthropoda	Insecta	Lepidoptera	Nymphalidae	Satyrinae		Erebia	Erebia ligea		Peter Sonderegger	petersonderegger@bluewin.ch
GBIFCH-BOL_LEPAA_0836	Arthropoda	Insecta	Lepidoptera	Nymphalidae	Heliconiinae		Speyeria	Speyeria agalaja		Peter Sonderegger	petersonderegger@bluewin.ch
GBIFCH-BOL_LEPAA_0837	Arthropoda	Insecta	Lepidoptera	Lycaenidae	Lycaeninae		Lycaena	Lycaena tityrus		Peter Sonderegger	petersonderegger@bluewin.ch
GBIFCH-BOL_LEPAA_0838	Arthropoda	Insecta	Lepidoptera	Pieridae	Coliadinae		Colias	Colias hyale		Peter Sonderegger	petersonderegger@bluewin.ch
GBIFCH-BOL_LEPAA_0839	Arthropoda	Insecta	Lepidoptera	Nymphalidae	Satyrinae		Erebia	Erebia meolans		Peter Sonderegger	petersonderegger@bluewin.ch
GBIFCH-BOL_LEPAA_0840	Arthropoda	Insecta	Lepidoptera	Nymphalidae	Satyrinae		Erebia	Erebia aethiops		Peter Sonderegger	petersonderegger@bluewin.ch
GBIFCH-BOL_LEPAA_0841	Arthropoda	Insecta	Lepidoptera	Nymphalidae	Nymphalinae		Melitaea	Melitaea cinxia		Peter Sonderegger	petersonderegger@bluewin.ch
GBIFCH-BOL_LEPAA_0842	Arthropoda	Insecta	Lepidoptera	Riodinidae	Nemeobiinae		Hamearis	Hamearis lucina		Peter Sonderegger	petersonderegger@bluewin.ch
GBIFCH-BOL_LEPAA_0843	Arthropoda	Insecta	Lepidoptera	Lycaenidae	Lycaeninae		Lycaena	Lycaena tityrus	Lycaena tityrus tityrus	Peter Sonderegger	petersonderegger@bluewin.ch
GBIFCH-BOL_LEPAA_0844	Arthropoda	Insecta	Lepidoptera	Zygaenidae	Zygaeninae		Zygaena	Zygaena lonicerae		Raymond Guenin
GBIFCH-BOL_LEPAA_0845	Arthropoda	Insecta	Lepidoptera	Zygaenidae	Zygaeninae		Zygaena	Zygaena transalpina		Raymond Guenin
GBIFCH-BOL_LEPAA_0846	Arthropoda	Insecta	Lepidoptera	Lycaenidae	Polyommatinae		Aricia	Aricia nicias		Peter Sonderegger	petersonderegger@bluewin.ch
GBIFCH-BOL_LEPAA_0847	Arthropoda	Insecta	Lepidoptera	Nymphalidae	Nymphalinae		Euphydryas	Euphydryas intermedia		Peter Sonderegger	petersonderegger@bluewin.ch
GBIFCH-BOL_LEPAA_0848	Arthropoda	Insecta	Lepidoptera	Pieridae	Dismorphiinae		Leptidea	Leptidea sinapis		Peter Sonderegger	petersonderegger@bluewin.ch
GBIFCH-BOL_LEPAA_0849	Arthropoda	Insecta	Lepidoptera	Nymphalidae	Satyrinae		Erebia	Erebia mnestra		Peter Sonderegger	petersonderegger@bluewin.ch
GBIFCH-BOL_LEPAA_0850	Arthropoda	Insecta	Lepidoptera	Lycaenidae	Theclinae		Satyrium	Satyrium w-album		Peter Sonderegger	petersonderegger@bluewin.ch
GBIFCH-BOL_LEPAA_0851	Arthropoda	Insecta	Lepidoptera	Zygaenidae	Procridinae		Adscita	Adscita alpina		Raymond Guenin
GBIFCH-BOL_LEPAA_0852	Arthropoda	Insecta	Lepidoptera	Hesperiidae	Pyrginae		Spialia	Spialia sertorius		Peter Sonderegger	petersonderegger@bluewin.ch
GBIFCH-BOL_LEPAA_0853	Arthropoda	Insecta	Lepidoptera	Zygaenidae	Zygaeninae		Zygaena	Zygaena lonicerae		Raymond Guenin
GBIFCH-BOL_LEPAA_0854	Arthropoda	Insecta	Lepidoptera	Pieridae	Coliadinae		Colias	Colias palaeno		Peter Sonderegger	petersonderegger@bluewin.ch
GBIFCH-BOL_LEPAA_0855	Arthropoda	Insecta	Lepidoptera	Papilionidae	Parnassiinae		Parnassius	Parnassius mnemosyne		Peter Sonderegger	petersonderegger@bluewin.ch
GBIFCH-BOL_LEPAA_0856	Arthropoda	Insecta	Lepidoptera	Nymphalidae	Nymphalinae		Nymphalis	Nymphalis antiopa		Peter Sonderegger	petersonderegger@bluewin.ch
GBIFCH-BOL_LEPAA_0857	Arthropoda	Insecta	Lepidoptera	Nymphalidae	Satyrinae		Lopinga	Lopinga achine		Peter Sonderegger	petersonderegger@bluewin.ch
GBIFCH-BOL_LEPAA_0858	Arthropoda	Insecta	Lepidoptera	Nymphalidae	Satyrinae		Erebia	Erebia mnestra		Peter Sonderegger	petersonderegger@bluewin.ch
GBIFCH-BOL_LEPAA_0859	Arthropoda	Insecta	Lepidoptera	Nymphalidae	Nymphalinae		Nymphalis	Nymphalis polychloros		Peter Sonderegger	petersonderegger@bluewin.ch
GBIFCH-BOL_LEPAA_0860	Arthropoda	Insecta	Lepidoptera	Lycaenidae	Polyommatinae		Polyommatus	Polyommatus escheri		Peter Sonderegger	petersonderegger@bluewin.ch
GBIFCH-BOL_LEPAA_0861	Arthropoda	Insecta	Lepidoptera	Pieridae	Pierinae		Euchloe	Euchloe simplonia		Peter Sonderegger	petersonderegger@bluewin.ch
GBIFCH-BOL_LEPAA_0862	Arthropoda	Insecta	Lepidoptera	Nymphalidae	Satyrinae		Erebia	Erebia euryale		Peter Sonderegger	petersonderegger@bluewin.ch
GBIFCH-BOL_LEPAA_0863	Arthropoda	Insecta	Lepidoptera	Lycaenidae	Theclinae		Satyrium	Satyrium w-album		Peter Sonderegger	petersonderegger@bluewin.ch
GBIFCH-BOL_LEPAA_0864	Arthropoda	Insecta	Lepidoptera	Nymphalidae	Heliconiinae		Speyeria	Speyeria agalaja		Peter Sonderegger	petersonderegger@bluewin.ch
GBIFCH-BOL_LEPAA_0865	Arthropoda	Insecta	Lepidoptera	Lycaenidae	Polyommatinae		Phengaris	Phengaris arion		Peter Sonderegger	petersonderegger@bluewin.ch
GBIFCH-BOL_LEPAA_0866	Arthropoda	Insecta	Lepidoptera	Pieridae	Pierinae		Pieris	Pieris bryoniae		Peter Sonderegger	petersonderegger@bluewin.ch
GBIFCH-BOL_LEPAA_0867	Arthropoda	Insecta	Lepidoptera	Nymphalidae	Satyrinae		Erebia	Erebia alberganus		Peter Sonderegger	petersonderegger@bluewin.ch
GBIFCH-BOL_LEPAA_0868	Arthropoda	Insecta	Lepidoptera	Lycaenidae	Polyommatinae		Polyommatus	Polyommatus amandus		Peter Sonderegger	petersonderegger@bluewin.ch
GBIFCH-BOL_LEPAA_0869	Arthropoda	Insecta	Lepidoptera	Pieridae	Pierinae		Pieris	Pieris bryoniae		Peter Sonderegger	petersonderegger@bluewin.ch
GBIFCH-BOL_LEPAA_0870	Arthropoda	Insecta	Lepidoptera	Hesperiidae	Pyrginae		Pyrgus	Pyrgus cacaliae		Peter Sonderegger	petersonderegger@bluewin.ch	identified by genitalia, anatomically
GBIFCH-BOL_LEPAA_0871	Arthropoda	Insecta	Lepidoptera	Nymphalidae	Heliconiinae		Boloria	Boloria thore		Peter Sonderegger	petersonderegger@bluewin.ch
GBIFCH-BOL_LEPAA_0872	Arthropoda	Insecta	Lepidoptera	Pieridae	Pierinae		Euchloe	Euchloe simplonia		Peter Sonderegger	petersonderegger@bluewin.ch
GBIFCH-BOL_LEPAA_0873	Arthropoda	Insecta	Lepidoptera	Nymphalidae	Nymphalinae		Melitaea	Melitaea deione		Peter Sonderegger	petersonderegger@bluewin.ch
GBIFCH-BOL_LEPAA_0874	Arthropoda	Insecta	Lepidoptera	Zygaenidae	Procridinae		Adscita	Adscita statices		Raymond Guenin		identified by genitalia, anatomically
GBIFCH-BOL_LEPAA_0875	Arthropoda	Insecta	Lepidoptera	Zygaenidae	Procridinae		Adscita	Adscita dujardini		Raymond Guenin		identified by genitalia, anatomically
GBIFCH-BOL_LEPAA_0876	Arthropoda	Insecta	Lepidoptera	Hesperiidae	Pyrginae		Carcharodus	Carcharodus lavatherae		Peter Sonderegger	petersonderegger@bluewin.ch
GBIFCH-BOL_LEPAA_0877	Arthropoda	Insecta	Lepidoptera	Nymphalidae	Satyrinae		Erebia	Erebia meolans		Peter Sonderegger	petersonderegger@bluewin.ch
GBIFCH-BOL_LEPAA_0878	Arthropoda	Insecta	Lepidoptera	Nymphalidae	Nymphalinae		Euphydryas	Euphydryas cynthia		Peter Sonderegger	petersonderegger@bluewin.ch
GBIFCH-BOL_LEPAA_0879	Arthropoda	Insecta	Lepidoptera	Nymphalidae	Satyrinae		Erebia	Erebia montana		Peter Sonderegger	petersonderegger@bluewin.ch
GBIFCH-BOL_LEPAA_0880	Arthropoda	Insecta	Lepidoptera	Hesperiidae	Pyrginae		Pyrgus	Pyrgus carthami		Peter Sonderegger	petersonderegger@bluewin.ch
GBIFCH-BOL_LEPAA_0881	Arthropoda	Insecta	Lepidoptera	Hesperiidae	Heteropterinae		Heteropterus	Heteropterus morpheus		Peter Sonderegger	petersonderegger@bluewin.ch
GBIFCH-BOL_LEPAA_0882	Arthropoda	Insecta	Lepidoptera	Hesperiidae	Pyrginae		Pyrgus	Pyrgus armoricanus		Peter Sonderegger	petersonderegger@bluewin.ch	identified by genitalia, anatomically
GBIFCH-BOL_LEPAA_0883	Arthropoda	Insecta	Lepidoptera	Nymphalidae	Heliconiinae		Boloria	Boloria thore		Peter Sonderegger	petersonderegger@bluewin.ch
GBIFCH-BOL_LEPAA_0884	Arthropoda	Insecta	Lepidoptera	Lycaenidae	Polyommatinae		Agriades	Agriades optilete		Peter Sonderegger	petersonderegger@bluewin.ch
GBIFCH-BOL_LEPAA_0885	Arthropoda	Insecta	Lepidoptera	Nymphalidae	Satyrinae		Erebia	Erebia pandrose		Peter Sonderegger	petersonderegger@bluewin.ch
GBIFCH-BOL_LEPAA_0886	Arthropoda	Insecta	Lepidoptera	Nymphalidae	Nymphalinae		Melitaea	Melitaea phoebe		Peter Sonderegger	petersonderegger@bluewin.ch
GBIFCH-BOL_LEPAA_0887	Arthropoda	Insecta	Lepidoptera	Nymphalidae	Satyrinae		Erebia	Erebia montana		Peter Sonderegger	petersonderegger@bluewin.ch
GBIFCH-BOL_LEPAA_0888	Arthropoda	Insecta	Lepidoptera	Pieridae	Pierinae		Pontia	Pontia callidice		Peter Sonderegger	petersonderegger@bluewin.ch
GBIFCH-BOL_LEPAA_0889	Arthropoda	Insecta	Lepidoptera	Lycaenidae	Polyommatinae		Agriades	Agriades orbitulus		Peter Sonderegger	petersonderegger@bluewin.ch
GBIFCH-BOL_LEPAA_0890	Arthropoda	Insecta	Lepidoptera	Lycaenidae	Lycaeninae		Lycaena	Lycaena virgaureae		Peter Sonderegger	petersonderegger@bluewin.ch
GBIFCH-BOL_LEPAA_0891	Arthropoda	Insecta	Lepidoptera	Zygaenidae	Zygaeninae		Zygaena	Zygaena fausta		Peter Sonderegger	petersonderegger@bluewin.ch
GBIFCH-BOL_LEPAA_0892	Arthropoda	Insecta	Lepidoptera	Zygaenidae	Zygaeninae		Zygaena	Zygaena fausta		Peter Sonderegger	petersonderegger@bluewin.ch
GBIFCH-BOL_LEPAA_0893	Arthropoda	Insecta	Lepidoptera	Nymphalidae	Satyrinae		Erebia	Erebia eriphyle		Peter Sonderegger	petersonderegger@bluewin.ch
GBIFCH-BOL_LEPAA_0894	Arthropoda	Insecta	Lepidoptera	Lycaenidae	Polyommatinae		Agriades	Agriades orbitulus		Peter Sonderegger	petersonderegger@bluewin.ch
GBIFCH-BOL_LEPAA_0895	Arthropoda	Insecta	Lepidoptera	Nymphalidae	Nymphalinae		Euphydryas	Euphydryas intermedia		Peter Sonderegger	petersonderegger@bluewin.ch
GBIFCH-BOL_LEPAA_0896	Arthropoda	Insecta	Lepidoptera	Papilionidae	Parnassiinae		Parnassius	Parnassius sacerdos		Peter Sonderegger	petersonderegger@bluewin.ch
GBIFCH-BOL_LEPAA_0897	Arthropoda	Insecta	Lepidoptera	Lycaenidae	Theclinae		Satyrium	Satyrium spini		Ulrich Hiermann (Aistleitner)
GBIFCH-BOL_LEPAA_0898	Arthropoda	Insecta	Lepidoptera	Nymphalidae	Satyrinae		Erebia	Erebia styx		Yannick Chittaro
GBIFCH-BOL_LEPAA_0899	Arthropoda	Insecta	Lepidoptera	Nymphalidae	Satyrinae		Coenonympha	Coenonympha tullia		Sonja Engler
GBIFCH-BOL_LEPAA_0900	Arthropoda	Insecta	Lepidoptera	Nymphalidae	Satyrinae		Coenonympha	Coenonympha tullia		Sonja Engler
GBIFCH-BOL_LEPAA_0901	Arthropoda	Insecta	Lepidoptera	Nymphalidae	Satyrinae		Coenonympha	Coenonympha tullia		Andreas Rotach
GBIFCH-BOL_LEPAA_0902	Arthropoda	Insecta	Lepidoptera	Nymphalidae	Satyrinae		Coenonympha	Coenonympha tullia		Andreas Rotach
GBIFCH-BOL_LEPAA_0903	Arthropoda	Insecta	Lepidoptera	Nymphalidae	Satyrinae		Coenonympha	Coenonympha tullia		Goran Dusej
GBIFCH-BOL_LEPAA_0904	Arthropoda	Insecta	Lepidoptera	Nymphalidae	Satyrinae		Coenonympha	Coenonympha tullia		Goran Dusej
GBIFCH-BOL_LEPAA_0905	Arthropoda	Insecta	Lepidoptera	Hesperiidae	Pyrginae		Pyrgus	Pyrgus warrenensis		Yannick Chittaro		identified by genitalia, anatomically
GBIFCH-BOL_LEPAA_0906	Arthropoda	Insecta	Lepidoptera	Nymphalidae	Satyrinae		Coenonympha	Coenonympha tullia		Yannick Chittaro		identified on photo
GBIFCH-BOL_LEPAA_0907	Arthropoda	Insecta	Lepidoptera	Hesperiidae	Pyrginae		Pyrgus	Pyrgus andromedae		Yannick Chittaro
GBIFCH-BOL_LEPAA_0944	Arthropoda	Insecta	Lepidoptera	Nymphalidae	Nymphalinae		Melitaea	Melitaea nevadensis		Sarah Schmid	sarah.schmid@unil.ch	identified by genitalia, anatomically
GBIFCH-BOL_LEPAA_0945	Arthropoda	Insecta	Lepidoptera	Nymphalidae	Nymphalinae		Melitaea	Melitaea nevadensis		Sarah Schmid	sarah.schmid@unil.ch	identified by genitalia, anatomically
GBIFCH-BOL_LEPAA_0946	Arthropoda	Insecta	Lepidoptera	Nymphalidae	Nymphalinae		Melitaea	Melitaea nevadensis		Sarah Schmid	sarah.schmid@unil.ch	identified by genitalia, anatomically
GBIFCH-BOL_LEPAA_0947	Arthropoda	Insecta	Lepidoptera	Nymphalidae	Nymphalinae		Melitaea	Melitaea nevadensis		Sarah Schmid	sarah.schmid@unil.ch	identified by genitalia, anatomically
GBIFCH-BOL_LEPAA_0948	Arthropoda	Insecta	Lepidoptera	Nymphalidae	Nymphalinae		Melitaea	Melitaea nevadensis		Sarah Schmid	sarah.schmid@unil.ch	identified by genitalia, anatomically
GBIFCH-BOL_LEPAA_0949	Arthropoda	Insecta	Lepidoptera	Nymphalidae	Nymphalinae		Melitaea	Melitaea athalia		Sarah Schmid	sarah.schmid@unil.ch	identified by genitalia, anatomically
GBIFCH-BOL_LEPAA_0950	Arthropoda	Insecta	Lepidoptera	Nymphalidae	Nymphalinae		Melitaea	Melitaea nevadensis		Sarah Schmid	sarah.schmid@unil.ch	identified by genitalia, anatomically
GBIFCH-BOL_LEPAA_0951	Arthropoda	Insecta	Lepidoptera	Nymphalidae	Nymphalinae		Melitaea	Melitaea nevadensis		Sarah Schmid	sarah.schmid@unil.ch	identified by genitalia, anatomically
GBIFCH-BOL_LEPAA_0952	Arthropoda	Insecta	Lepidoptera	Lycaenidae	Polyommatinae		Aricia	Aricia agestis		Yannick Chittaro
GBIFCH-BOL_LEPAA_0953	Arthropoda	Insecta	Lepidoptera	Lycaenidae	Polyommatinae		Aricia	Aricia agestis		Jessica R. Litman	jessica.litman@unine.ch
GBIFCH-BOL_LEPAA_0954	Arthropoda	Insecta	Lepidoptera	Lycaenidae	Polyommatinae		Aricia	Aricia artaxerxes		Anton Mayr	a.mayr.mon@hoermann.at
GBIFCH-BOL_LEPAA_0955	Arthropoda	Insecta	Lepidoptera	Lycaenidae	Polyommatinae		Aricia	Aricia artaxerxes		Ulrich Hiermann	u.hiermann@aon.at
GBIFCH-BOL_LEPAA_0956	Arthropoda	Insecta	Lepidoptera	Lycaenidae	Polyommatinae		Aricia	Aricia agestis		Yannick Chittaro
GBIFCH-BOL_LEPAA_0957	Arthropoda	Insecta	Lepidoptera	Lycaenidae	Lycaeninae		Lycaena	Lycaena tityrus	Lycaena tityrus tityrus	Sebastien Gerber
GBIFCH-BOL_LEPAA_0958	Arthropoda	Insecta	Lepidoptera	Lycaenidae	Polyommatinae		Aricia	Aricia artaxerxes		Peter Sonderegger	petersonderegger@bluewin.ch
GBIFCH-BOL_LEPAA_0959	Arthropoda	Insecta	Lepidoptera	Lycaenidae	Polyommatinae		Aricia	Aricia artaxerxes		Peter Sonderegger	petersonderegger@bluewin.ch
GBIFCH-BOL_LEPAA_0960	Arthropoda	Insecta	Lepidoptera	Lycaenidae	Lycaeninae		Lycaena	Lycaena tityrus		Arno Schanowski
GBIFCH-BOL_LEPAA_0961	Arthropoda	Insecta	Lepidoptera	Lycaenidae	Lycaeninae		Lycaena	Lycaena tityrus	Lycaena tityrus tityrus	Arno Schanowski
GBIFCH-BOL_LEPAA_0962	Arthropoda	Insecta	Lepidoptera	Lycaenidae	Lycaeninae		Lycaena	Lycaena tityrus	Lycaena tityrus subalpina	Peter Sonderegger	petersonderegger@bluewin.ch
GBIFCH-BOL_LEPAA_0964	Arthropoda	Insecta	Lepidoptera	Lycaenidae	Lycaeninae		Lycaena	Lycaena tityrus	Lycaena tityrus subalpina	Ulrich Hiermann	u.hiermann@aon.at
GBIFCH-BOL_LEPAA_0965	Arthropoda	Insecta	Lepidoptera	Hesperiidae	Hesperiinae		Thymelicus	Thymelicus lineola		Jerome Fournier
GBIFCH-BOL_LEPAA_0966	Arthropoda	Insecta	Lepidoptera	Hesperiidae	Hesperiinae		Thymelicus	Thymelicus lineola		Peter Sonderegger	petersonderegger@bluewin.ch
GBIFCH-BOL_LEPAA_0967	Arthropoda	Insecta	Lepidoptera	Hesperiidae	Hesperiinae		Thymelicus	Thymelicus lineola		Marc Tourrette
GBIFCH-BOL_LEPAA_0968	Arthropoda	Insecta	Lepidoptera	Hesperiidae	Hesperiinae		Thymelicus	Thymelicus lineola		Yannick Chittaro
GBIFCH-BOL_LEPAA_0969	Arthropoda	Insecta	Lepidoptera	Hesperiidae	Hesperiinae		Thymelicus	Thymelicus sylvestris		Andreas Sanchez
GBIFCH-BOL_LEPAA_0970	Arthropoda	Insecta	Lepidoptera	Hesperiidae	Hesperiinae		Thymelicus	Thymelicus sylvestris		Peter Sonderegger	petersonderegger@bluewin.ch
GBIFCH-BOL_LEPAA_0971	Arthropoda	Insecta	Lepidoptera	Hesperiidae	Hesperiinae		Thymelicus	Thymelicus sylvestris		Yannick Chittaro
GBIFCH-BOL_LEPAA_0972	Arthropoda	Insecta	Lepidoptera	Hesperiidae	Hesperiinae		Thymelicus	Thymelicus sylvestris		Marc Tourrette
GBIFCH-BOL_LEPAA_0974	Arthropoda	Insecta	Lepidoptera	Lycaenidae	Lycaeninae		Lycaena	Lycaena helle		Yannick Chittaro		identified at sight
GBIFCH-BOL_LEPAA_0975	Arthropoda	Insecta	Lepidoptera	Lycaenidae	Lycaeninae		Lycaena	Lycaena helle		Olivier Turin
GBIFCH-BOL_LEPAA_0976	Arthropoda	Insecta	Lepidoptera	Nymphalidae	Satyrinae		Coenonympha	Coenonympha glycerion		Yannick Chittaro
GBIFCH-BOL_LEPAA_0977	Arthropoda	Insecta	Lepidoptera	Pieridae	Dismorphiinae		Leptidea	Leptidea sinapis		Martin Albrecht	carcharodus@hotmail.com	identified by genitalia, anatomically
GBIFCH-BOL_LEPAA_0978	Arthropoda	Insecta	Lepidoptera	Pieridae	Dismorphiinae		Leptidea	Leptidea juvernica		Peter Sonderegger	petersonderegger@bluewin.ch
GBIFCH-BOL_LEPAA_0979	Arthropoda	Insecta	Lepidoptera	Lycaenidae	Theclinae		Satyrium	Satyrium w-album		Sebastien Gerber
GBIFCH-BOL_LEPAA_0980	Arthropoda	Insecta	Lepidoptera	Lycaenidae	Theclinae		Satyrium	Satyrium w-album		Isabella Forini Giacalone	isa.forini@gmail.com
GBIFCH-BOL_LEPAA_0981	Arthropoda	Insecta	Lepidoptera	Lycaenidae	Theclinae		Satyrium	Satyrium w-album		Ulrich Hiermann	u.hiermann@aon.at
GBIFCH-BOL_LEPAA_0982	Arthropoda	Insecta	Lepidoptera	Lycaenidae	Theclinae		Satyrium	Satyrium w-album		Barbara Huber
GBIFCH-BOL_LEPAA_0983	Arthropoda	Insecta	Lepidoptera	Papilionidae	Parnassiinae		Parnassius	Parnassius sacerdos		Ulrich Hiermann	u.hiermann@aon.at
GBIFCH-BOL_LEPAA_0984	Arthropoda	Insecta	Lepidoptera	Nymphalidae	Apaturinae		Apatura	Apatura iris		Markus Bur
GBIFCH-BOL_LEPAA_0985	Arthropoda	Insecta	Lepidoptera	Nymphalidae	Libytheinae		Libythea	Libythea celtis		Paolo Palmi
GBIFCH-BOL_LEPAA_0986	Arthropoda	Insecta	Lepidoptera	Nymphalidae	Nymphalinae		Euphydryas	Euphydryas aurinia	Euphydryas aurinia glaciegenita	Peter Sonderegger	petersonderegger@bluewin.ch
GBIFCH-BOL_LEPAA_0987	Arthropoda	Insecta	Lepidoptera	Lycaenidae	Polyommatinae		Phengaris	Phengaris alcon		Peter Sonderegger	petersonderegger@bluewin.ch		ecotype wetland
GBIFCH-BOL_LEPAA_0988	Arthropoda	Insecta	Lepidoptera	Lycaenidae	Polyommatinae		Cupido	Cupido osiris		Yannick Chittaro
GBIFCH-BOL_LEPAA_0989	Arthropoda	Insecta	Lepidoptera	Hesperiidae	Pyrginae		Pyrgus	Pyrgus alveus		Yannick Chittaro		identified by genitalia, anatomically
GBIFCH-BOL_LEPAA_0991	Arthropoda	Insecta	Lepidoptera	Lycaenidae	Polyommatinae		Agriades	Agriades orbitulus		Yannick Chittaro
GBIFCH-BOL_LEPAA_0992	Arthropoda	Insecta	Lepidoptera	Hesperiidae	Pyrginae		Pyrgus	Pyrgus warrenensis		Yannick Chittaro		identified by genitalia, anatomically
GBIFCH-BOL_LEPAA_0993	Arthropoda	Insecta	Lepidoptera	Nymphalidae	Satyrinae		Erebia	Erebia tyndarus		Yannick Chittaro
GBIFCH-BOL_LEPAA_0994	Arthropoda	Insecta	Lepidoptera	Nymphalidae	Satyrinae		Erebia	Erebia sudetica		Yannick Chittaro
GBIFCH-BOL_LEPAA_0995	Arthropoda	Insecta	Lepidoptera	Lycaenidae	Polyommatinae		Aricia	Aricia artaxerxes		Yannick Chittaro
GBIFCH-BOL_LEPAA_0996	Arthropoda	Insecta	Lepidoptera	Pieridae	Pierinae		Pontia	Pontia edusa		Yannick Chittaro
GBIFCH-BOL_LEPAA_0997	Arthropoda	Insecta	Lepidoptera	Hesperiidae	Pyrginae		Pyrgus	Pyrgus malvoides		Yannick Chittaro		identified by genitalia, anatomically
GBIFCH-BOL_LEPAA_0998	Arthropoda	Insecta	Lepidoptera	Nymphalidae	Satyrinae		Coenonympha	Coenonympha gardetta		Yannick Chittaro
GBIFCH-BOL_LEPAA_0999	Arthropoda	Insecta	Lepidoptera	Nymphalidae	Satyrinae		Coenonympha	Coenonympha gardetta		Yannick Chittaro
GBIFCH-BOL_LEPAA_1000	Arthropoda	Insecta	Lepidoptera	Nymphalidae	Satyrinae		Coenonympha	Coenonympha gardetta		Yannick Chittaro
GBIFCH-BOL_LEPAA_1001	Arthropoda	Insecta	Lepidoptera	Hesperiidae	Pyrginae		Pyrgus	Pyrgus andromedae		Yannick Chittaro
GBIFCH-BOL_LEPAA_1002	Arthropoda	Insecta	Lepidoptera	Zygaenidae	Procridinae		Adscita	Adscita statices x alpina		Yannick Chittaro
GBIFCH-BOL_LEPAA_1003	Arthropoda	Insecta	Lepidoptera	Zygaenidae	Procridinae		Adscita	Adscita statices x alpina		Yannick Chittaro
GBIFCH-BOL_LEPAA_1004	Arthropoda	Insecta	Lepidoptera	Zygaenidae	Procridinae		Adscita	Adscita statices		Yannick Chittaro
GBIFCH-BOL_LEPAA_1005	Arthropoda	Insecta	Lepidoptera	Zygaenidae	Zygaeninae		Zygaena	Zygaena purpuralis		Yannick Chittaro		identified by genitalia, anatomically
GBIFCH-BOL_LEPAA_1006	Arthropoda	Insecta	Lepidoptera	Nymphalidae	Satyrinae		Erebia	Erebia flavofasciata		Yannick Chittaro
GBIFCH-BOL_LEPAA_0908	Arthropoda	Insecta	Lepidoptera	Nymphalidae	Satyrinae		Erebia	Erebia ligea		Anton Mayr	a.mayr.mon@hoermann.at
GBIFCH-BOL_LEPAA_0909	Arthropoda	Insecta	Lepidoptera	Nymphalidae	Satyrinae		Erebia	Erebia ligea		Marc Tourrette
GBIFCH-BOL_LEPAA_0910	Arthropoda	Insecta	Lepidoptera	Zygaenidae	Zygaeninae		Zygaena	Zygaena lonicerae		Yannick Chittaro
GBIFCH-BOL_LEPAA_0911	Arthropoda	Insecta	Lepidoptera	Nymphalidae	Satyrinae		Pyronia	Pyronia tithonus		Sebastien Gerber
GBIFCH-BOL_LEPAA_0912	Arthropoda	Insecta	Lepidoptera	Nymphalidae	Satyrinae		Pyronia	Pyronia tithonus		Yannick Chittaro
GBIFCH-BOL_LEPAA_0913	Arthropoda	Insecta	Lepidoptera	Lycaenidae	Polyommatinae		Lampides	Lampides boeticus		Laura Farina
GBIFCH-BOL_LEPAA_0914	Arthropoda	Insecta	Lepidoptera	Nymphalidae	Satyrinae		Coenonympha	Coenonympha darwiniana		Jerome Fournier
GBIFCH-BOL_LEPAA_0915	Arthropoda	Insecta	Lepidoptera	Nymphalidae	Satyrinae		Coenonympha	Coenonympha darwiniana		Peter Sonderegger	petersonderegger@bluewin.ch
GBIFCH-BOL_LEPAA_0916	Arthropoda	Insecta	Lepidoptera	Nymphalidae	Satyrinae		Erebia	Erebia euryale		Martin Albrecht	carcharodus@hotmail.com
GBIFCH-BOL_LEPAA_0917	Arthropoda	Insecta	Lepidoptera	Nymphalidae	Satyrinae		Erebia	Erebia euryale		Peter Sonderegger	petersonderegger@bluewin.ch
GBIFCH-BOL_LEPAA_0918	Arthropoda	Insecta	Lepidoptera	Nymphalidae	Satyrinae		Erebia	Erebia manto		Martin Albrecht	carcharodus@hotmail.com
GBIFCH-BOL_LEPAA_0919	Arthropoda	Insecta	Lepidoptera	Nymphalidae	Satyrinae		Erebia	Erebia manto		Peter Sonderegger	petersonderegger@bluewin.ch
GBIFCH-BOL_LEPAA_0920	Arthropoda	Insecta	Lepidoptera	Nymphalidae	Satyrinae		Erebia	Erebia manto		Ulrich Hiermann	u.hiermann@aon.at
GBIFCH-BOL_LEPAA_0921	Arthropoda	Insecta	Lepidoptera	Nymphalidae	Satyrinae		Coenonympha	Coenonympha gardetta		Anton Mayr	a.mayr.mon@hoermann.at
GBIFCH-BOL_LEPAA_0922	Arthropoda	Insecta	Lepidoptera	Lycaenidae	Polyommatinae		Scolitantides	Scolitantides orion		Isabella Forini Giacalone	isa.forini@gmail.com
GBIFCH-BOL_LEPAA_0923	Arthropoda	Insecta	Lepidoptera	Nymphalidae	Satyrinae		Coenonympha	Coenonympha gardetta		Peter Sonderegger	petersonderegger@bluewin.ch
GBIFCH-BOL_LEPAA_0924	Arthropoda	Insecta	Lepidoptera	Nymphalidae	Satyrinae		Coenonympha	Coenonympha gardetta		Peter Sonderegger	petersonderegger@bluewin.ch
GBIFCH-BOL_LEPAA_0925	Arthropoda	Insecta	Lepidoptera	Nymphalidae	Satyrinae		Coenonympha	Coenonympha gardetta		Peter Sonderegger	petersonderegger@bluewin.ch
GBIFCH-BOL_LEPAA_0926	Arthropoda	Insecta	Lepidoptera	Nymphalidae	Satyrinae		Coenonympha	Coenonympha gardetta		Peter Sonderegger	petersonderegger@bluewin.ch
GBIFCH-BOL_LEPAA_0927	Arthropoda	Insecta	Lepidoptera	Nymphalidae	Satyrinae		Erebia	Erebia tyndarus		Jerome Fournier
GBIFCH-BOL_LEPAA_0928	Arthropoda	Insecta	Lepidoptera	Nymphalidae	Satyrinae		Erebia	Erebia arvernensis		Martin Albrecht	carcharodus@hotmail.com
GBIFCH-BOL_LEPAA_0929	Arthropoda	Insecta	Lepidoptera	Nymphalidae	Satyrinae		Erebia	Erebia tyndarus		Andreas Sanchez
GBIFCH-BOL_LEPAA_0930	Arthropoda	Insecta	Lepidoptera	Nymphalidae	Satyrinae		Erebia	Erebia tyndarus		Anton Mayr	a.mayr.mon@hoermann.at
GBIFCH-BOL_LEPAA_0931	Arthropoda	Insecta	Lepidoptera	Hesperiidae	Heteropterinae		Heteropterus	Heteropterus morpheus		Isabella Forini Giacalone	isa.forini@gmail.com
GBIFCH-BOL_LEPAA_0932	Arthropoda	Insecta	Lepidoptera	Nymphalidae	Nymphalinae		Melitaea	Melitaea didyma		Andreas Sanchez
GBIFCH-BOL_LEPAA_0933	Arthropoda	Insecta	Lepidoptera	Lycaenidae	Lycaeninae		Lycaena	Lycaena hippothoe	Lycaena hippothoe eurydice	Ulrich Hiermann	u.hiermann@aon.at
GBIFCH-BOL_LEPAA_0934	Arthropoda	Insecta	Lepidoptera	Hesperiidae	Pyrginae		Pyrgus	Pyrgus accreta		Peter Sonderegger	petersonderegger@bluewin.ch
GBIFCH-BOL_LEPAA_0935	Arthropoda	Insecta	Lepidoptera	Lycaenidae	Lycaeninae		Lycaena	Lycaena hippothoe	Lycaena hippothoe eurydice	Martin Albrecht	carcharodus@hotmail.com
GBIFCH-BOL_LEPAA_0936	Arthropoda	Insecta	Lepidoptera	Lycaenidae	Lycaeninae		Lycaena	Lycaena hippothoe	Lycaena hippothoe eurydame	Anton Mayr	a.mayr.mon@hoermann.at
GBIFCH-BOL_LEPAA_0937	Arthropoda	Insecta	Lepidoptera	Lycaenidae	Lycaeninae		Lycaena	Lycaena hippothoe		Daniel Bolt	daniel.bolt@anu.gr.ch
GBIFCH-BOL_LEPAA_0938	Arthropoda	Insecta	Lepidoptera	Lycaenidae	Lycaeninae		Lycaena	Lycaena hippothoe	Lycaena hippothoe eurydice	Jean-claude Gerber
GBIFCH-BOL_LEPAA_0939	Arthropoda	Insecta	Lepidoptera	Nymphalidae	Nymphalinae		Melitaea	Melitaea asteria		Anton Mayr	a.mayr.mon@hoermann.at
GBIFCH-BOL_LEPAA_0940	Arthropoda	Insecta	Lepidoptera	Nymphalidae	Nymphalinae		Melitaea	Melitaea asteria		K. Cerny
GBIFCH-BOL_LEPAA_0941	Arthropoda	Insecta	Lepidoptera	Nymphalidae	Nymphalinae		Melitaea	Melitaea asteria		Anton Mayr	a.mayr.mon@hoermann.at
GBIFCH-BOL_LEPAA_0942	Arthropoda	Insecta	Lepidoptera	Nymphalidae	Nymphalinae		Melitaea	Melitaea nevadensis		Sarah Schmid	sarah.schmid@unil.ch	identified by genitalia, anatomically
GBIFCH-BOL_LEPAA_0943	Arthropoda	Insecta	Lepidoptera	Nymphalidae	Nymphalinae		Melitaea	Melitaea nevadensis		Sarah Schmid	sarah.schmid@unil.ch	identified by genitalia, anatomically
GBIFCH-BOL_LEPAA_0963	Arthropoda	Insecta	Lepidoptera	Lycaenidae	Lycaeninae		Lycaena	Lycaena tityrus	Lycaena tityrus tityrus	Peter Sonderegger	petersonderegger@bluewin.ch
GBIFCH-BOL_LEPAA_0990	Arthropoda	Insecta	Lepidoptera	Lycaenidae	Polyommatinae		Polyommatus	Polyommatus amandus		Yannick Chittaro
GBIFCH-BOL_LEPAA_1013	Arthropoda	Insecta	Lepidoptera	Zygaenidae	Zygaeninae		Zygaena	Zygaena osterodensis		Christophe Praz	christophe.praz@unine.ch
GBIFCH-BOL_LEPAA_1014	Arthropoda	Insecta	Lepidoptera	Zygaenidae	Zygaeninae		Zygaena	Zygaena osterodensis		Christophe Praz	christophe.praz@unine.ch
GBIFCH-BOL_LEPAA_1015	Arthropoda	Insecta	Lepidoptera	Zygaenidae	Zygaeninae		Zygaena	Zygaena osterodensis		Christophe Praz	christophe.praz@unine.ch	identified by genitalia, anatomically
GBIFCH-BOL_LEPAA_1016	Arthropoda	Insecta	Lepidoptera	Zygaenidae	Zygaeninae		Zygaena	Zygaena osterodensis		Christophe Praz	christophe.praz@unine.ch
GBIFCH-BOL_LEPAA_1017	Arthropoda	Insecta	Lepidoptera	Zygaenidae	Zygaeninae		Zygaena	Zygaena romeo		Christophe Praz	christophe.praz@unine.ch
GBIFCH-BOL_LEPAA_1018	Arthropoda	Insecta	Lepidoptera	Zygaenidae	Zygaeninae		Zygaena	Zygaena romeo		Christophe Praz	christophe.praz@unine.ch	identified by genitalia, anatomically
GBIFCH-BOL_LEPAA_1019	Arthropoda	Insecta	Lepidoptera	Zygaenidae	Zygaeninae		Zygaena	Zygaena purpuralis		Christophe Praz	christophe.praz@unine.ch
GBIFCH-BOL_LEPAA_1020	Arthropoda	Insecta	Lepidoptera	Zygaenidae	Zygaeninae		Zygaena	Zygaena loti		Christophe Praz	christophe.praz@unine.ch
GBIFCH-BOL_LEPAA_1021	Arthropoda	Insecta	Lepidoptera	Zygaenidae	Zygaeninae		Zygaena	Zygaena purpuralis		Emmanuel Wermeille		identified by genitalia, anatomically
GBIFCH-BOL_LEPAA_1022	Arthropoda	Insecta	Lepidoptera	Zygaenidae	Zygaeninae		Zygaena	Zygaena purpuralis		Emmanuel Wermeille		identified by genitalia, anatomically
GBIFCH-BOL_LEPAA_1023	Arthropoda	Insecta	Lepidoptera	Zygaenidae	Zygaeninae		Zygaena	Zygaena loti		Christophe Praz	christophe.praz@unine.ch
GBIFCH-BOL_LEPAA_1024	Arthropoda	Insecta	Lepidoptera	Zygaenidae	Zygaeninae		Zygaena	Zygaena osterodensis		Christophe Praz	christophe.praz@unine.ch	identified by genitalia, anatomically
GBIFCH-BOL_LEPAA_1025	Arthropoda	Insecta	Lepidoptera	Zygaenidae	Zygaeninae		Zygaena	Zygaena osterodensis		Christophe Praz	christophe.praz@unine.ch
GBIFCH-BOL_LEPAA_1026	Arthropoda	Insecta	Lepidoptera	Zygaenidae	Zygaeninae		Zygaena	Zygaena osterodensis		Christophe Praz	christophe.praz@unine.ch
GBIFCH-BOL_LEPAA_1027	Arthropoda	Insecta	Lepidoptera	Zygaenidae	Zygaeninae		Zygaena	Zygaena romeo		Emmanuel Wermeille
GBIFCH-BOL_LEPAA_1028	Arthropoda	Insecta	Lepidoptera	Zygaenidae	Zygaeninae		Zygaena	Zygaena romeo		Emmanuel Wermeille
GBIFCH-BOL_LEPAA_1029	Arthropoda	Insecta	Lepidoptera	Zygaenidae	Zygaeninae		Zygaena	Zygaena romeo		Emmanuel Wermeille
GBIFCH-BOL_LEPAA_1030	Arthropoda	Insecta	Lepidoptera	Zygaenidae	Zygaeninae		Zygaena	Zygaena romeo		Emmanuel Wermeille
GBIFCH-BOL_LEPAA_1031	Arthropoda	Insecta	Lepidoptera	Zygaenidae	Zygaeninae		Zygaena	Zygaena romeo		Emmanuel Wermeille		identified by genitalia, anatomically
GBIFCH-BOL_LEPAA_1032	Arthropoda	Insecta	Lepidoptera	Zygaenidae	Zygaeninae		Zygaena	Zygaena romeo		Emmanuel Wermeille
GBIFCH-BOL_LEPAA_1033	Arthropoda	Insecta	Lepidoptera	Zygaenidae	Zygaeninae		Zygaena	Zygaena romeo		Emmanuel Wermeille		identified by genitalia, anatomically
GBIFCH-BOL_LEPAA_1034	Arthropoda	Insecta	Lepidoptera	Zygaenidae	Zygaeninae		Zygaena	Zygaena viciae		Emmanuel Wermeille
GBIFCH-BOL_LEPAA_1035	Arthropoda	Insecta	Lepidoptera	Zygaenidae	Zygaeninae		Zygaena	Zygaena carniolica		Emmanuel Wermeille
GBIFCH-BOL_LEPAA_1036	Arthropoda	Insecta	Lepidoptera	Zygaenidae	Procridinae		Rhagades	Rhagades pruni		Emmanuel Wermeille
GBIFCH-BOL_LEPAA_1037	Arthropoda	Insecta	Lepidoptera	Zygaenidae	Procridinae		Jordanita	Jordanita notata		Emmanuel Wermeille		identified by genitalia, anatomically
GBIFCH-BOL_LEPAA_1038	Arthropoda	Insecta	Lepidoptera	Zygaenidae	Procridinae		Adscita	Adscita geryon		Emmanuel Wermeille		identified by genitalia, anatomically
GBIFCH-BOL_LEPAA_1039	Arthropoda	Insecta	Lepidoptera	Zygaenidae	Zygaeninae		Zygaena	Zygaena filipendulae		Emmanuel Wermeille
GBIFCH-BOL_LEPAA_1040	Arthropoda	Insecta	Lepidoptera	Zygaenidae	Zygaeninae		Zygaena	Zygaena transalpina		Emmanuel Wermeille
GBIFCH-BOL_LEPAA_1041	Arthropoda	Insecta	Lepidoptera	Zygaenidae	Zygaeninae		Zygaena	Zygaena romeo		Yannick Chittaro
GBIFCH-BOL_LEPAA_1042	Arthropoda	Insecta	Lepidoptera	Zygaenidae	Zygaeninae		Zygaena	Zygaena romeo		Yannick Chittaro
GBIFCH-BOL_LEPAA_1043	Arthropoda	Insecta	Lepidoptera	Zygaenidae	Zygaeninae		Zygaena	Zygaena romeo		Yannick Chittaro
GBIFCH-BOL_LEPAA_1044	Arthropoda	Insecta	Lepidoptera	Zygaenidae	Zygaeninae		Zygaena	Zygaena romeo		Yannick Chittaro
GBIFCH-BOL_LEPAA_1045	Arthropoda	Insecta	Lepidoptera	Zygaenidae	Zygaeninae		Zygaena	Zygaena osterodensis		Emmanuel Wermeille		identified by genitalia, anatomically
GBIFCH-BOL_LEPAA_1046	Arthropoda	Insecta	Lepidoptera	Zygaenidae	Zygaeninae		Zygaena	Zygaena osterodensis		Emmanuel Wermeille		identified by genitalia, anatomically
GBIFCH-BOL_LEPAA_1047	Arthropoda	Insecta	Lepidoptera	Zygaenidae	Zygaeninae		Zygaena	Zygaena osterodensis		Emmanuel Wermeille
GBIFCH-BOL_LEPAA_1048	Arthropoda	Insecta	Lepidoptera	Zygaenidae	Zygaeninae		Zygaena	Zygaena osterodensis		Yannick Chittaro
GBIFCH-BOL_LEPAA_1049	Arthropoda	Insecta	Lepidoptera	Zygaenidae	Zygaeninae		Zygaena	Zygaena osterodensis		Yannick Chittaro
GBIFCH-BOL_LEPAA_1050	Arthropoda	Insecta	Lepidoptera	Zygaenidae	Zygaeninae		Zygaena	Zygaena trifolii		Andre Rey
GBIFCH-BOL_LEPAA_1051	Arthropoda	Insecta	Lepidoptera	Zygaenidae	Zygaeninae		Zygaena	Zygaena trifolii		Andre Rey
GBIFCH-BOL_LEPAA_1052	Arthropoda	Insecta	Lepidoptera	Zygaenidae	Zygaeninae		Zygaena	Zygaena minos		Raymond Guenin
GBIFCH-BOL_LEPAA_1053	Arthropoda	Insecta	Lepidoptera	Zygaenidae	Zygaeninae		Zygaena	Zygaena minos		Raymond Guenin
GBIFCH-BOL_LEPAA_1054	Arthropoda	Insecta	Lepidoptera	Zygaenidae	Zygaeninae		Zygaena	Zygaena purpuralis		Emmanuel Wermeille		identified by genitalia, anatomically
GBIFCH-BOL_LEPAA_1055	Arthropoda	Insecta	Lepidoptera	Zygaenidae	Zygaeninae		Zygaena	Zygaena minos		Raymond Guenin		identified by genitalia, anatomically
GBIFCH-BOL_LEPAA_1056	Arthropoda	Insecta	Lepidoptera	Zygaenidae	Zygaeninae		Zygaena	Zygaena fausta		Yannick Chittaro
GBIFCH-BOL_LEPAA_1057	Arthropoda	Insecta	Lepidoptera	Zygaenidae	Zygaeninae		Zygaena	Zygaena viciae		Yannick Chittaro
GBIFCH-BOL_LEPAA_1058	Arthropoda	Insecta	Lepidoptera	Zygaenidae	Zygaeninae		Zygaena	Zygaena carniolica		Yannick Chittaro
GBIFCH-BOL_LEPAA_1059	Arthropoda	Insecta	Lepidoptera	Zygaenidae	Zygaeninae		Zygaena	Zygaena exulans		Yannick Chittaro
GBIFCH-BOL_LEPAA_1060	Arthropoda	Insecta	Lepidoptera	Zygaenidae	Zygaeninae		Zygaena	Zygaena ephialtes		Marie-christine Chittaro
GBIFCH-BOL_LEPAA_1061	Arthropoda	Insecta	Lepidoptera	Nymphalidae	Satyrinae		Hipparchia	Hipparchia fagi		Christophe Praz	christophe.praz@unine.ch
GBIFCH-BOL_LEPAA_1062	Arthropoda	Insecta	Lepidoptera	Nymphalidae	Satyrinae		Erebia	Erebia manto		Peter Sonderegger	petersonderegger@bluewin.ch
GBIFCH-BOL_LEPAA_1063	Arthropoda	Insecta	Lepidoptera	Nymphalidae	Satyrinae		Erebia	Erebia manto		Peter Sonderegger	petersonderegger@bluewin.ch
GBIFCH-BOL_LEPAA_1064	Arthropoda	Insecta	Lepidoptera	Nymphalidae	Satyrinae		Erebia	Erebia manto		Peter Sonderegger	petersonderegger@bluewin.ch
GBIFCH-BOL_LEPAA_1065	Arthropoda	Insecta	Lepidoptera	Nymphalidae	Satyrinae		Hipparchia	Hipparchia fagi		Christophe Praz	christophe.praz@unine.ch

## Sheet: Specimen Details
Project:	LEPAA			User:	Jessica R. Litman
Created:	2018-10-10
Sample ID	Sex	Reproduction	Life Stage	Extra Info	Notes	Voucher Status	Tissue Descriptor	External URLs	Associated Taxa	Associated Specimens
GBIFCH-BOL_LEPAA_0045
GBIFCH-BOL_LEPAA_0046
GBIFCH-BOL_LEPAA_0047
GBIFCH-BOL_LEPAA_0048
GBIFCH-BOL_LEPAA_0001
GBIFCH-BOL_LEPAA_0002
GBIFCH-BOL_LEPAA_0003
GBIFCH-BOL_LEPAA_0004
GBIFCH-BOL_LEPAA_0005
GBIFCH-BOL_LEPAA_0006
GBIFCH-BOL_LEPAA_0007
GBIFCH-BOL_LEPAA_0008
GBIFCH-BOL_LEPAA_0009
GBIFCH-BOL_LEPAA_0010
GBIFCH-BOL_LEPAA_0011
GBIFCH-BOL_LEPAA_0012
GBIFCH-BOL_LEPAA_0013
GBIFCH-BOL_LEPAA_0014
GBIFCH-BOL_LEPAA_0015
GBIFCH-BOL_LEPAA_0016
GBIFCH-BOL_LEPAA_0017
GBIFCH-BOL_LEPAA_0018
GBIFCH-BOL_LEPAA_0019
GBIFCH-BOL_LEPAA_0020
GBIFCH-BOL_LEPAA_0021
GBIFCH-BOL_LEPAA_0022
GBIFCH-BOL_LEPAA_0023
GBIFCH-BOL_LEPAA_0024
GBIFCH-BOL_LEPAA_0025
GBIFCH-BOL_LEPAA_0026
GBIFCH-BOL_LEPAA_0027
GBIFCH-BOL_LEPAA_0028
GBIFCH-BOL_LEPAA_0029
GBIFCH-BOL_LEPAA_0030
GBIFCH-BOL_LEPAA_0031
GBIFCH-BOL_LEPAA_0032	M
GBIFCH-BOL_LEPAA_0033
GBIFCH-BOL_LEPAA_0034
GBIFCH-BOL_LEPAA_0035
GBIFCH-BOL_LEPAA_0036	M
GBIFCH-BOL_LEPAA_0037
GBIFCH-BOL_LEPAA_0038
GBIFCH-BOL_LEPAA_0039
GBIFCH-BOL_LEPAA_0040
GBIFCH-BOL_LEPAA_0041
GBIFCH-BOL_LEPAA_0042
GBIFCH-BOL_LEPAA_0043
GBIFCH-BOL_LEPAA_0044
GBIFCH-BOL_LEPAA_0049
GBIFCH-BOL_LEPAA_0050
GBIFCH-BOL_LEPAA_0051
GBIFCH-BOL_LEPAA_0052
GBIFCH-BOL_LEPAA_0053
GBIFCH-BOL_LEPAA_0054
GBIFCH-BOL_LEPAA_0055
GBIFCH-BOL_LEPAA_0056
GBIFCH-BOL_LEPAA_0057
GBIFCH-BOL_LEPAA_0058
GBIFCH-BOL_LEPAA_0059
GBIFCH-BOL_LEPAA_0060
GBIFCH-BOL_LEPAA_0061
GBIFCH-BOL_LEPAA_0062
GBIFCH-BOL_LEPAA_0063
GBIFCH-BOL_LEPAA_0064
GBIFCH-BOL_LEPAA_0065
GBIFCH-BOL_LEPAA_0066
GBIFCH-BOL_LEPAA_0067
GBIFCH-BOL_LEPAA_0068
GBIFCH-BOL_LEPAA_0069
GBIFCH-BOL_LEPAA_0070
GBIFCH-BOL_LEPAA_0071
GBIFCH-BOL_LEPAA_0072
GBIFCH-BOL_LEPAA_0073
GBIFCH-BOL_LEPAA_0074
GBIFCH-BOL_LEPAA_0075
GBIFCH-BOL_LEPAA_0076
GBIFCH-BOL_LEPAA_0077
GBIFCH-BOL_LEPAA_0078
GBIFCH-BOL_LEPAA_0079
GBIFCH-BOL_LEPAA_0080
GBIFCH-BOL_LEPAA_0081
GBIFCH-BOL_LEPAA_0082
GBIFCH-BOL_LEPAA_0083	M
GBIFCH-BOL_LEPAA_0084
GBIFCH-BOL_LEPAA_0085
GBIFCH-BOL_LEPAA_0086
GBIFCH-BOL_LEPAA_0087
GBIFCH-BOL_LEPAA_0088
GBIFCH-BOL_LEPAA_0089
GBIFCH-BOL_LEPAA_0090
GBIFCH-BOL_LEPAA_0091
GBIFCH-BOL_LEPAA_0092
GBIFCH-BOL_LEPAA_0093
GBIFCH-BOL_LEPAA_0094
GBIFCH-BOL_LEPAA_0095
GBIFCH-BOL_LEPAA_0096
GBIFCH-BOL_LEPAA_0097
GBIFCH-BOL_LEPAA_0098
GBIFCH-BOL_LEPAA_0099
GBIFCH-BOL_LEPAA_0100
GBIFCH-BOL_LEPAA_0101
GBIFCH-BOL_LEPAA_0102
GBIFCH-BOL_LEPAA_0103
GBIFCH-BOL_LEPAA_0104
GBIFCH-BOL_LEPAA_0105
GBIFCH-BOL_LEPAA_0106
GBIFCH-BOL_LEPAA_0107
GBIFCH-BOL_LEPAA_0108
GBIFCH-BOL_LEPAA_0109
GBIFCH-BOL_LEPAA_0110
GBIFCH-BOL_LEPAA_0111
GBIFCH-BOL_LEPAA_0112
GBIFCH-BOL_LEPAA_0113
GBIFCH-BOL_LEPAA_0114
GBIFCH-BOL_LEPAA_0115
GBIFCH-BOL_LEPAA_0116
GBIFCH-BOL_LEPAA_0117
GBIFCH-BOL_LEPAA_0118
GBIFCH-BOL_LEPAA_0119
GBIFCH-BOL_LEPAA_0120
GBIFCH-BOL_LEPAA_0121
GBIFCH-BOL_LEPAA_0122
GBIFCH-BOL_LEPAA_0123
GBIFCH-BOL_LEPAA_0124
GBIFCH-BOL_LEPAA_0125	M
GBIFCH-BOL_LEPAA_0126	M
GBIFCH-BOL_LEPAA_0127	F
GBIFCH-BOL_LEPAA_0128	M
GBIFCH-BOL_LEPAA_0129
GBIFCH-BOL_LEPAA_0130
GBIFCH-BOL_LEPAA_0131
GBIFCH-BOL_LEPAA_0132
GBIFCH-BOL_LEPAA_0133
GBIFCH-BOL_LEPAA_0134
GBIFCH-BOL_LEPAA_0135
GBIFCH-BOL_LEPAA_0136
GBIFCH-BOL_LEPAA_0137
GBIFCH-BOL_LEPAA_0138
GBIFCH-BOL_LEPAA_0139
GBIFCH-BOL_LEPAA_0140
GBIFCH-BOL_LEPAA_0141
GBIFCH-BOL_LEPAA_0142
GBIFCH-BOL_LEPAA_0143
GBIFCH-BOL_LEPAA_0144
GBIFCH-BOL_LEPAA_0145
GBIFCH-BOL_LEPAA_0146
GBIFCH-BOL_LEPAA_0147
GBIFCH-BOL_LEPAA_0148
GBIFCH-BOL_LEPAA_0149
GBIFCH-BOL_LEPAA_0150
GBIFCH-BOL_LEPAA_0151
GBIFCH-BOL_LEPAA_0152
GBIFCH-BOL_LEPAA_0153
GBIFCH-BOL_LEPAA_0154
GBIFCH-BOL_LEPAA_0155
GBIFCH-BOL_LEPAA_0156
GBIFCH-BOL_LEPAA_0157
GBIFCH-BOL_LEPAA_0158
GBIFCH-BOL_LEPAA_0159
GBIFCH-BOL_LEPAA_0160
GBIFCH-BOL_LEPAA_0161
GBIFCH-BOL_LEPAA_0162
GBIFCH-BOL_LEPAA_0163
GBIFCH-BOL_LEPAA_0164
GBIFCH-BOL_LEPAA_0165
GBIFCH-BOL_LEPAA_0166
GBIFCH-BOL_LEPAA_0167
GBIFCH-BOL_LEPAA_0168
GBIFCH-BOL_LEPAA_0169
GBIFCH-BOL_LEPAA_0170
GBIFCH-BOL_LEPAA_0171
GBIFCH-BOL_LEPAA_0172
GBIFCH-BOL_LEPAA_0173
GBIFCH-BOL_LEPAA_0174
GBIFCH-BOL_LEPAA_0175
GBIFCH-BOL_LEPAA_0176
GBIFCH-BOL_LEPAA_0177
GBIFCH-BOL_LEPAA_0178
GBIFCH-BOL_LEPAA_0179
GBIFCH-BOL_LEPAA_0180
GBIFCH-BOL_LEPAA_0181
GBIFCH-BOL_LEPAA_0182
GBIFCH-BOL_LEPAA_0183
GBIFCH-BOL_LEPAA_0184
GBIFCH-BOL_LEPAA_0185
GBIFCH-BOL_LEPAA_0186
GBIFCH-BOL_LEPAA_0187
GBIFCH-BOL_LEPAA_0188
GBIFCH-BOL_LEPAA_0189
GBIFCH-BOL_LEPAA_0190
GBIFCH-BOL_LEPAA_0191
GBIFCH-BOL_LEPAA_0192
GBIFCH-BOL_LEPAA_0193
GBIFCH-BOL_LEPAA_0194
GBIFCH-BOL_LEPAA_0195
GBIFCH-BOL_LEPAA_0196
GBIFCH-BOL_LEPAA_0197
GBIFCH-BOL_LEPAA_0198
GBIFCH-BOL_LEPAA_0199
GBIFCH-BOL_LEPAA_0200
GBIFCH-BOL_LEPAA_0201
GBIFCH-BOL_LEPAA_0202
GBIFCH-BOL_LEPAA_0203
GBIFCH-BOL_LEPAA_0204
GBIFCH-BOL_LEPAA_0205
GBIFCH-BOL_LEPAA_0206
GBIFCH-BOL_LEPAA_0207
GBIFCH-BOL_LEPAA_0208
GBIFCH-BOL_LEPAA_0209
GBIFCH-BOL_LEPAA_0210
GBIFCH-BOL_LEPAA_0211
GBIFCH-BOL_LEPAA_0212
GBIFCH-BOL_LEPAA_0213
GBIFCH-BOL_LEPAA_0214
GBIFCH-BOL_LEPAA_0215
GBIFCH-BOL_LEPAA_0216	M
GBIFCH-BOL_LEPAA_0217	F
GBIFCH-BOL_LEPAA_0218
GBIFCH-BOL_LEPAA_0219
GBIFCH-BOL_LEPAA_0220
GBIFCH-BOL_LEPAA_0221
GBIFCH-BOL_LEPAA_0222
GBIFCH-BOL_LEPAA_0223
GBIFCH-BOL_LEPAA_0224
GBIFCH-BOL_LEPAA_0225
GBIFCH-BOL_LEPAA_0226
GBIFCH-BOL_LEPAA_0227
GBIFCH-BOL_LEPAA_0228
GBIFCH-BOL_LEPAA_0229
GBIFCH-BOL_LEPAA_0230
GBIFCH-BOL_LEPAA_0231
GBIFCH-BOL_LEPAA_0232
GBIFCH-BOL_LEPAA_0233
GBIFCH-BOL_LEPAA_0234
GBIFCH-BOL_LEPAA_0235
GBIFCH-BOL_LEPAA_0236
GBIFCH-BOL_LEPAA_0237
GBIFCH-BOL_LEPAA_0238
GBIFCH-BOL_LEPAA_0239
GBIFCH-BOL_LEPAA_0240
GBIFCH-BOL_LEPAA_0241
GBIFCH-BOL_LEPAA_0242
GBIFCH-BOL_LEPAA_0243
GBIFCH-BOL_LEPAA_0244
GBIFCH-BOL_LEPAA_0245
GBIFCH-BOL_LEPAA_0246
[truncated: 811 more rows]

## Sheet: Collection Data
Sample ID	BOLD Process ID	Identification	Collector	Collection Date	Country	Canton	Locality	Lat	Lon	Institution Storing	Identifier
[truncated: 868 more rows]
