# Supplementary material for: A DNA barcode reference library for Swiss butterflies and forester moths as a tool for species identification, systematics and conservation
Source: PLoS One. 2018 Dec 21;13(12):e0208639. doi: 10.1371/journal.pone.0208639 (PMC6303096; doi:10.1371/journal.pone.0208639)
Supplement: S2 Table — Two-hundred twenty-four species were considered as Swiss residents for the purposes of this study. All changes from the Swiss Red List (Wermeille et al. 2014) have been noted. Species for which no sequences were obtained are marked in red. (XLSX) [file pone.0208639.s012.xlsx]

## Sheet: Species list
Family	Species list	Referred to on Swiss Red List (2014) as:
Zygaenidae	Adscita alpina (Alberti, 1937)	same
Zygaenidae	Adscita dujardini Efetov & Tarmann, 2014	Adscita albanica (Naufock, 1926)
Zygaenidae	Adscita geryon (Hübner, 1813)	same
Zygaenidae	Adscita mannii (Lederer, 1853)	same
Zygaenidae	Adscita statices (Linnaeus, 1758)	same
Nymphalidae	Aglais io (Linnaeus, 1758)	Inachis io (Linnaeus, 1758)
Nymphalidae	Aglais urticae (Linnaeus, 1758)	same
Lycaenidae	Agriades glandon (Prunner, 1798)	Plebeius glandon (Prunner, 1798)
Lycaenidae	Agriades optilete (Knoch, 1781)	Plebeius optilete (Knoch, 1781)
Lycaenidae	Agriades orbitulus (Prunner, 1798)	Plebeius orbitulus (Prunner, 1798)
Pieridae	Anthocharis cardamines (Linnaeus, 1758)	same
Nymphalidae	Apatura ilia (Denis & Schiffermüller, 1775)	same
Nymphalidae	Apatura iris (Linnaeus, 1758)	same
Nymphalidae	Aphantopus hyperantus (Linnaeus, 1758)	same
Pieridae	Aporia crataegi (Linnaeus, 1758)	same
Nymphalidae	Araschnia levana (Linnaeus, 1758)	same
Nymphalidae	Argynnis pandora (Denis & Schiffermüller, 1775)	same
Nymphalidae	Argynnis paphia (Linnaeus, 1758)	same
Lycaenidae	Aricia agestis (Denis & Schiffermüller, 1775)	same
Lycaenidae	Aricia artaxerxes (Fabricius, 1793)	same
Lycaenidae	Aricia nicias (Meigen, 1830)	same
Nymphalidae	Boloria aquilonaris (Stichel, 1908)	same
Nymphalidae	Boloria dia (Linnaeus, 1767)	same
Nymphalidae	Boloria euphrosyne (Linnaeus, 1758)	same
Nymphalidae	Boloria napaea (Hoffmannsegg, 1804)	same
Nymphalidae	Boloria pales (Denis & Schiffermüller, 1775)	same
Nymphalidae	Boloria selene (Denis & Schiffermüller, 1775)	same
Nymphalidae	Boloria thore (Hübner, 1803)	same
Nymphalidae	Boloria titania (Esper, 1793)	same
Nymphalidae	Brenthis daphne (Denis & Schiffermüller, 1775)	same
Nymphalidae	Brenthis ino (Rottemburg, 1775)	same
Nymphalidae	Brintesia circe (Fabricius, 1775)	same
Lycaenidae	Cacyreus marshalli Butler, 1898	same
Lycaenidae	Callophrys rubi (Linnaeus, 1758)	same
Hesperiidae	Carcharodus alceae (Esper, 1780)	same
Hesperiidae	Carcharodus floccifera (Zeller, 1847)	same
Hesperiidae	Carcharodus lavatherae (Esper, 1783)	same
Hesperiidae	Carterocephalus palaemon (Pallas, 1771)	same
Lycaenidae	Celastrina argiolus (Linnaeus, 1758)	same
Nymphalidae	Chazara briseis (Linnaeus, 1764)	same
Nymphalidae	Coenonympha arcania (Linnaeus, 1761)	same
Nymphalidae	Coenonympha darwiniana Staudinger, 1871	same
Nymphalidae	Coenonympha gardetta (Prunner, 1798)	same
Nymphalidae	Coenonympha glycerion (Borkhausen, 1788)	same
Nymphalidae	Coenonympha hero (Linnaeus, 1761)	same
Nymphalidae	Coenonympha oedippus (Fabricius, 1787)	same
Nymphalidae	Coenonympha pamphilus (Linnaeus, 1758)	same
Nymphalidae	Coenonympha tullia (Müller, 1764)	same
Pieridae	Colias alfacariensis Ribbe, 1905	same
Pieridae	Colias croceus (Fourcroy, 1785)	same
Pieridae	Colias hyale (Linnaeus, 1758)	same
Pieridae	Colias palaeno (Linnaeus, 1761)	same
Pieridae	Colias phicomone (Esper, 1780)	same
Lycaenidae	Cupido alcetas (Hoffmannsegg, 1804)	same
Lycaenidae	Cupido argiades (Pallas, 1771)	same
Lycaenidae	Cupido minimus (Fuessly, 1775)	same
Lycaenidae	Cupido osiris (Meigen, 1829)	same
Lycaenidae	Cyaniris semiargus (Rottemburg, 1775)	Polyommatus semiargus (Rottemburg, 1775)
Nymphalidae	Erebia aethiops (Esper, 1777)	same
Nymphalidae	Erebia alberganus (Prunner, 1798)	same
Nymphalidae	Erebia arvernensis Oberthür, 1908	Erebia cassioides (Reiner & Hochenwarth, 1792)
Nymphalidae	Erebia bubastis (Meisner, 1818)	same
Nymphalidae	Erebia christi Rätzer, 1890	same
Nymphalidae	Erebia epiphron (Knoch, 1783)	same
Nymphalidae	Erebia eriphyle (Freyer, 1836)	same
Nymphalidae	Erebia euryale (Esper, 1805)	same
Nymphalidae	Erebia flavofasciata Heyne, 1895	same
Nymphalidae	Erebia gorge (Hübner, 1804)	same
Nymphalidae	Erebia ligea (Linnaeus, 1758)	same
Nymphalidae	Erebia manto (Denis & Schiffermüller, 1775)	same
Nymphalidae	Erebia medusa (Denis & Schiffermüller, 1775)	same
Nymphalidae	Erebia melampus (Fuessly, 1775)	same
Nymphalidae	Erebia meolans (Prunner, 1798)	same
Nymphalidae	Erebia mnestra (Hübner, 1804)	same
Nymphalidae	Erebia montana (Prunner, 1798)	same
Nymphalidae	Erebia nivalis Lorkovic & Lesse, 1954	same
Nymphalidae	Erebia oeme (Hübner, 1804)	same
Nymphalidae	Erebia pandrose (Borkhausen, 1788)	same
Nymphalidae	Erebia pharte (Hübner, 1804)	same
Nymphalidae	Erebia pluto (Prunner, 1798)	same
Nymphalidae	Erebia pronoe (Esper, 1780)	same
Nymphalidae	Erebia styx (Freyer, 1834)	same
Nymphalidae	Erebia sudetica Staudinger, 1861	same
Nymphalidae	Erebia triaria (Prunner, 1798)	same
Nymphalidae	Erebia tyndarus (Esper, 1781)	same
Hesperiidae	Erynnis tages (Linnaeus, 1758)	same
Pieridae	Euchloe simplonia (Boisduval, 1828)	same
Lycaenidae	Eumedonia eumedon (Esper, 1780)	Aricia eumedon (Esper, 1780)
Nymphalidae	Euphydryas aurinia (Rottemburg, 1775)	same
Nymphalidae	Euphydryas cynthia (Denis & Schiffermüller, 1775)	same
Nymphalidae	Euphydryas intermedia (Ménétriés, 1859)	same
Nymphalidae	Fabriciana adippe (Denis & Schiffermüller, 1775)	Argynnis adippe (Denis & Schiffermüller, 1775)
Nymphalidae	Fabriciana niobe (Linnaeus, 1758)	Argynnis niobe (Linnaeus, 1758)
Lycaenidae	Favonius quercus (Linnaeus, 1758)	Neozephyrus quercus (Linnaeus, 1758)
Lycaenidae	Glaucopsyche alexis (Poda, 1761)	same
Pieridae	Gonepteryx rhamni (Linnaeus, 1758)	same
Riodinidae	Hamearis lucina (Linnaeus, 1758)	same
Hesperiidae	Hesperia comma (Linnaeus, 1758)	same
Hesperiidae	Heteropterus morpheus (Pallas, 1771)	same
Nymphalidae	Hipparchia fagi (Scopoli, 1763)	same
Nymphalidae	Hipparchia genava (Fruhstorfer, 1908)	same
Nymphalidae	Hipparchia semele (Linnaeus, 1758)	same
Nymphalidae	Hipparchia statilinus (Hufnagel, 1766)	same
Nymphalidae	Hyponephele lycaon (Rottemburg, 1775)	same
Lycaenidae	Iolana iolas (Ochsenheimer, 1816)	same
Papilionidae	Iphiclides podalirius (Linnaeus, 1758)	same
Nymphalidae	Issoria lathonia (Linnaeus, 1758)	same
Zygaenidae	Jordanita chloros (Hübner, 1813)	same
Zygaenidae	Jordanita globulariae (Hübner, 1793)	same
Zygaenidae	Jordanita notata (Zeller, 1847)	same
Zygaenidae	Jordanita subsolana (Staudinger, 1862)	same
Lycaenidae	Kretania trappi (Verity, 1927)	Plebeius trappi (Verity, 1927)
Nymphalidae	Lasiommata maera (Linnaeus, 1758)	same
Nymphalidae	Lasiommata megera (Linnaeus, 1767)	same
Nymphalidae	Lasiommata petropolitana (Fabricius, 1787)	same
Pieridae	Leptidea juvernica Williams, 1946	same
Pieridae	Leptidea sinapis (Linnaeus, 1758)	same
Nymphalidae	Libythea celtis (Laicharting, 1782)	same
Nymphalidae	Limenitis camilla (Linnaeus, 1764)	same
Nymphalidae	Limenitis populi (Linnaeus, 1758)	same
Nymphalidae	Limenitis reducta Staudinger, 1901	same
Nymphalidae	Lopinga achine (Scopoli, 1763)	same
Lycaenidae	Lycaena alciphron (Rottemburg, 1775)	same
Lycaenidae	Lycaena dispar (Haworth, 1802)	same
Lycaenidae	Lycaena helle (Denis & Schiffermüller, 1775)	same
Lycaenidae	Lycaena hippothoe (Linnaeus, 1761)	same
Lycaenidae	Lycaena phlaeas (Linnaeus, 1761)	same
Lycaenidae	Lycaena tityrus (Poda, 1761)	same
Lycaenidae	Lycaena virgaureae (Linnaeus, 1758)	same
Lycaenidae	Lysandra bellargus (Rottemburg, 1775)	Polyommatus bellargus (Rottemburg, 1775)
Lycaenidae	Lysandra coridon (Poda, 1761)	Polyommatus coridon (Poda, 1761)
Nymphalidae	Maniola jurtina (Linnaeus, 1758)	same
Nymphalidae	Melanargia galathea (Linnaeus, 1758)	same
Nymphalidae	Melitaea asteria Freyer, 1828	same
Nymphalidae	Melitaea athalia (Rottemburg, 1775)	same
Nymphalidae	Melitaea aurelia Nickerl, 1850	same
Nymphalidae	Melitaea britomartis Assmann, 1847	same
Nymphalidae	Melitaea cinxia (Linnaeus, 1758)	same
Nymphalidae	Melitaea deione (Geyer, 1832)	same
Nymphalidae	Melitaea diamina (Lang, 1789)	same
Nymphalidae	Melitaea didyma (Esper, 1778)	same
Nymphalidae	Melitaea nevadensis Oberthür, 1904	included within Melitaea athalia (Rottemburg, 1775)
Nymphalidae	Melitaea parthenoides Keferstein, 1851	same
Nymphalidae	Melitaea phoebe (Denis & Schiffermüller, 1775)	same
Nymphalidae	Melitaea varia Meyer-Dür, 1851	same
Nymphalidae	Minois dryas (Scopoli, 1763)	same
Nymphalidae	Neptis rivularis (Scopoli, 1763)	same
Nymphalidae	Nymphalis antiopa (Linnaeus, 1758)	same
Nymphalidae	Nymphalis polychloros (Linnaeus, 1758)	same
Hesperiidae	Ochlodes sylvanus (Esper, 1778)	Ochlodes venata (Bremer & Grey, 1853)
Nymphalidae	Oeneis glacialis (Moll, 1783)	same
Papilionidae	Papilio machaon Linnaeus, 1758	same
Nymphalidae	Pararge aegeria (Linnaeus, 1758)	same
Papilionidae	Parnassius apollo (Linnaeus, 1758)	same
Papilionidae	Parnassius mnemosyne (Linnaeus, 1758)	same
Papilionidae	Parnassius sacerdos Stichel, 1906	Parnassius phoebus (Fabricius, 1793)
Lycaenidae	Phengaris alcon (Denis & Schiffermüller, 1775)	Maculinea alcon (Denis & Schiffermüller, 1775)
Lycaenidae	Phengaris arion (Linnaeus, 1758)	Maculinea arion (Linnaeus, 1758)
Lycaenidae	Phengaris nausithous (Bergsträsser, 1779)	Maculinea nausithous (Bergsträsser, 1779)
Lycaenidae	Phengaris teleius (Bergsträsser, 1779)	Maculinea teleius (Bergsträsser, 1779)
Pieridae	Pieris brassicae (Linnaeus, 1758)	same
Pieridae	Pieris bryoniae (Hübner, 1806)	same
Pieridae	Pieris mannii (Mayer, 1851)	same
Pieridae	Pieris napi (Linnaeus, 1758)	same
Pieridae	Pieris rapae (Linnaeus, 1758)	same
Lycaenidae	Plebejus argus (Linnaeus, 1758)	Plebeius argus (Linnaeus, 1758)
Lycaenidae	Plebejus argyrognomon (Bergsträsser, 1779)	Plebeius argyrognomon (Bergsträsser, 1779)
Lycaenidae	Plebejus idas (Linnaeus, 1761)	Plebeius idas (Linnaeus, 1761)
Nymphalidae	Polygonia c-album (Linnaeus, 1758)	same
Lycaenidae	Polyommatus amandus (Schneider, 1792)	same
Lycaenidae	Polyommatus damon (Denis & Schiffermüller, 1775)	same
Lycaenidae	Polyommatus daphnis (Denis & Schiffermüller, 1775)	same
Lycaenidae	Polyommatus dorylas (Denis & Schiffermüller, 1775)	same
Lycaenidae	Polyommatus eros (Ochsenheimer, 1808)	same
Lycaenidae	Polyommatus escheri (Hübner, 1823)	same
Lycaenidae	Polyommatus icarus (Rottemburg, 1775)	same
Lycaenidae	Polyommatus thersites (Cantener, 1835)	same
Pieridae	Pontia callidice (Hübner, 1800)	same
Pieridae	Pontia edusa (Fabricius, 1777)	same
Lycaenidae	Pseudophilotes baton (Bergsträsser, 1779)	same
Hesperiidae	Pyrgus accreta (Verity, 1925)	Pyrgus accretus Verity, 1925
Hesperiidae	Pyrgus alveus (Hübner, 1803)	same
Hesperiidae	Pyrgus andromedae (Wallengren, 1853)	same
Hesperiidae	Pyrgus armoricanus (Oberthür, 1910)	same
Hesperiidae	Pyrgus cacaliae (Rambur, 1839)	same
Hesperiidae	Pyrgus carlinae (Rambur, 1839)	same
Hesperiidae	Pyrgus carthami (Hübner, 1813)	same
Hesperiidae	Pyrgus cirsii (Rambur, 1839)	same
Hesperiidae	Pyrgus malvae (Linnaeus, 1758)	same
Hesperiidae	Pyrgus malvoides (Elwes & Edwards, 1897)	same
Hesperiidae	Pyrgus onopordi (Rambur, 1839)	same
Hesperiidae	Pyrgus serratulae (Rambur, 1839)	same
Hesperiidae	Pyrgus warrenensis (Verity, 1928)	same
Nymphalidae	Pyronia tithonus (Linnaeus, 1767)	same
Zygaenidae	Rhagades pruni (Denis & Schiffermüller, 1775)	same
Lycaenidae	Satyrium acaciae (Fabricius, 1787)	same
Lycaenidae	Satyrium ilicis (Esper, 1779)	same
Lycaenidae	Satyrium pruni (Linnaeus, 1758)	same
Lycaenidae	Satyrium spini (Denis & Schiffermüller, 1775)	same
Lycaenidae	Satyrium w-album (Knoch, 1782)	same
Nymphalidae	Satyrus ferula (Fabricius, 1793)	same
Lycaenidae	Scolitantides orion (Pallas, 1771)	same
Nymphalidae	Speyeria aglaja (Linnaeus, 1758)	Argynnis aglaja (Linnaeus, 1758)
Hesperiidae	Spialia sertorius (Hoffmannsegg, 1804)	same
Lycaenidae	Thecla betulae (Linnaeus, 1758)	same
Hesperiidae	Thymelicus acteon (Rottemburg, 1775)	same
Hesperiidae	Thymelicus lineola (Ochsenheimer, 1808)	same
Hesperiidae	Thymelicus sylvestris (Poda, 1761)	same
Nymphalidae	Vanessa atalanta (Linnaeus, 1758)	same
Nymphalidae	Vanessa cardui (Linnaeus, 1758)	same
Zygaenidae	Zygaena carniolica (Scopoli, 1763)	same
Zygaenidae	Zygaena ephialtes (Linnaeus, 1767)	same
Zygaenidae	Zygaena exulans (Hohenwarth, 1792)	same
Zygaenidae	Zygaena fausta (Linnaeus, 1767)	same
Zygaenidae	Zygaena filipendulae (Linnaeus, 1758)	same
Zygaenidae	Zygaena lonicerae (Scheven, 1777)	same
Zygaenidae	Zygaena loti (Denis & Schiffermüller, 1775)	same
Zygaenidae	Zygaena minos (Denis & Schiffermüller, 1775)	same
Zygaenidae	Zygaena osterodensis Reiss, 1921	same
Zygaenidae	Zygaena purpuralis (Brünnich, 1763)	same
Zygaenidae	Zygaena romeo Duponchel, 1835	same
Zygaenidae	Zygaena transalpina (Esper, 1780)	same
Zygaenidae	Zygaena trifolii (Esper, 1783)	same
Zygaenidae	Zygaena viciae (Denis & Schiffermüller, 1775)	same
)
